# Supplementary material for: Unified enantiospecific synthesis of drimane meroterpenoids enabled by enzyme catalysis and transition metal catalysis
Source: Royal Society of Chemistry journal article supplement (doi:10.1039/d4sc06060a), 2024-01-01

## Supporting Information

### Unified Enantiospecific Synthesis of Drimane Meroterpenoids Enabled by Enzyme Catalysis and Transition Metal Catalysis

Yipeng You,<sup>‡a</sup> Xue-Jie Zhang,<sup>‡b</sup> Wen Xiao,<sup>b</sup> Thittaya Kunthic,<sup>b</sup> Zheng Xiang,<sup>\*b,c</sup> and Chen Xu<sup>\*a</sup>

<sup>a</sup>Shenzhen Grubbs Institute and Department of Chemistry, Guangdong Provincial Key Laboratory of Catalysis, Southern University of Science and Technology, 1088 Xueyuan Avenue, Shenzhen (P. R. China). E-mail: xuc@sustech.edu.cn

<sup>b</sup>State Key Laboratory of Chemical Oncogenomics, Shenzhen Key Laboratory of Chemical Genomics, AI for Science (AI4S) Preferred Program, School of Chemical Biology and Biotechnology, Peking University Shenzhen Graduate School, University Town of Shenzhen, Nanshan District, Shenzhen 518055 (P. R. China). E-mail: zxiang@pku.edu.cn

<sup>c</sup>Institute of Chemical Biology, Shenzhen Bay Laboratory, Gaoke Innovation Center, Guangqiao Road, Guangming District, Shenzhen 518132 (P.R. China).

<sup>‡</sup> These authors contributed equally to this work.

## Table of Contents

|                                                                                                                            |    |
|----------------------------------------------------------------------------------------------------------------------------|----|
| 1. Supplementary figures and schemes.....                                                                                  | 3  |
| 2. Materials and methods.....                                                                                              | 4  |
| 3. Heterologous biosynthesis of drimenol.....                                                                              | 6  |
| 3.1 Strains and plasmids.....                                                                                              | 6  |
| 3.2 Protein and codon-optimized nucleotide sequences of enzymes and multienzymes assembly modules used in this study. .... | 7  |
| 3.3 Multienzymes assembly modules of top MVA pathway (MCS1 of pACYCDuet-1 plasmid) .....                                   | 13 |
| 3.4 Multienzymes assembly modules of cross-linking MVA-drimenol synthesis pathway (pETDuet-1)..                            | 16 |
| 3.5 Heterologous biosynthesis of drimenol in <i>E. coli</i> .....                                                          | 18 |
| 4. Biocatalytic oxidation of drimenol catalyzed by P450 <sub>BM3</sub> mutants.....                                        | 22 |
| 4.1 Expression and purification of cytochrome P450 <sub>BM3</sub> (F87A) and BmGDH.....                                    | 22 |
| 4.2 <i>In vitro</i> enzymatic assay of P450 <sub>BM3</sub> (F87A) .....                                                    | 25 |
| 4.3 Product identification .....                                                                                           | 26 |
| 4.4 Docking drimenol into P450 <sub>BM3</sub> (F87A) .....                                                                 | 28 |
| 4.5 Construction of the focus library of P450 <sub>BM3</sub> .....                                                         | 28 |
| 4.6 Screening of the P450 <sub>BM3</sub> library .....                                                                     | 29 |
| 4.7 Optimization of the reaction conditions for drimenol oxidation .....                                                   | 30 |
| 4.8 Gram-scale oxidation of drimenol with P450 <sub>BM3</sub> (L75A/F87I).....                                             | 30 |
| 5. Synthetic procedures .....                                                                                              | 31 |
| 5.1 Optimization for the Ni-catalyzed reductive coupling reaction .....                                                    | 31 |
| 5.2 Synthesis of drimane halides and aryl halides.....                                                                     | 33 |
| 5.3 Synthesis of (+)- <i>ent</i> -chromazonarol .....                                                                      | 39 |
| 5.4 Synthesis of (+)-8- <i>epi</i> -puupehenol .....                                                                       | 39 |
| 5.5 Synthesis of (-)-pelorol.....                                                                                          | 45 |
| 5.6 Synthesis of (-)-mycoleptodiscin A .....                                                                               | 47 |
| 5.7 Synthesis of (+)-hongoquercin A.....                                                                                   | 49 |
| 5.8 Synthesis of (+)-hongoquercin B.....                                                                                   | 53 |
| 6. NMR comparisons.....                                                                                                    | 59 |
| 7. References .....                                                                                                        | 71 |
| 8. NMR spectra .....                                                                                                       | 71 |

## 1. Supplementary figures and schemes

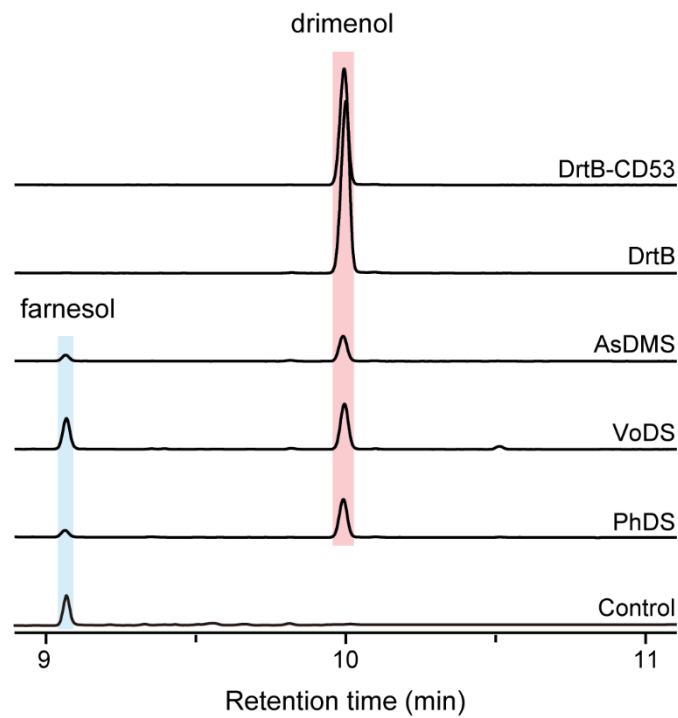

**Figure S1.** GC-MS analysis of product profile of drimenol synthases from four species in *E. coli*. The main product drimenol and side product farnesol were shaded with red and blue background, respectively. The *E. coli* strain harboring pACYCDuet-T1B1 and pETDuet-ERG20 as control.

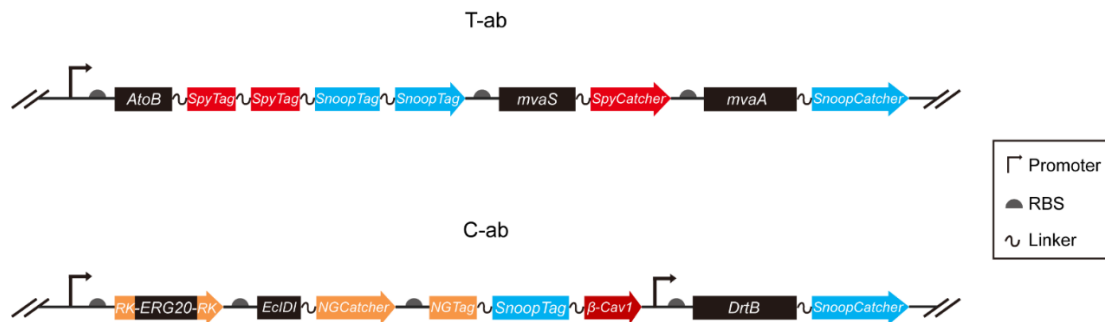

**Figure S2.** Schematic overview of the genetic design of multienzyme assembly for drimenol production.

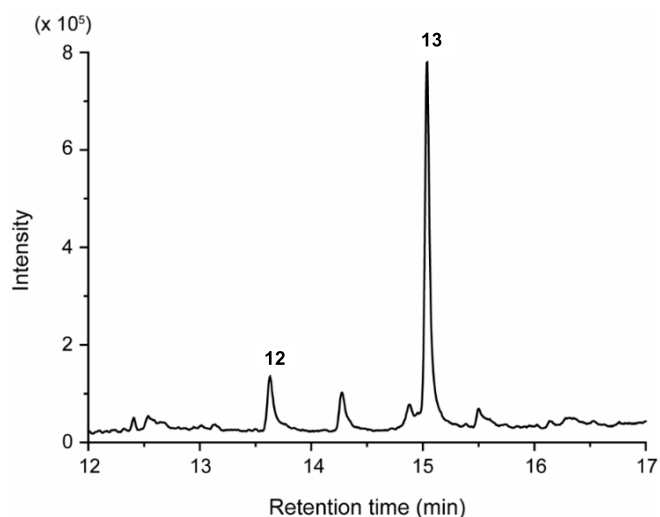

**Figure S3.** *In vitro* enzymatic assay of P450<sub>BM3</sub> (F87A) using 0.2 mM compound **12** (Rt. 13.63 min) as substrate. Compound **13** (Rt. 15.04 min) is observed after 16 h reaction.

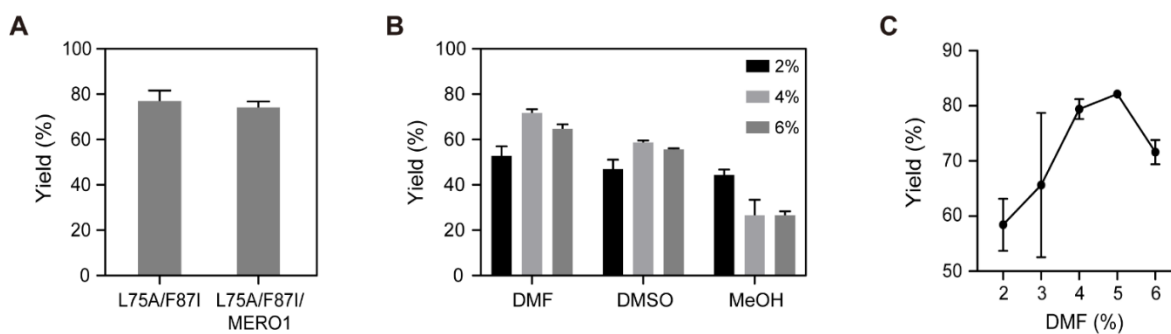

**Figure S4.** Optimization of C3-hydroxylation of drimenol (**11**). A) Comparison of the yield of **12** between P450<sub>BM3</sub> (L75A/F87I) and P450<sub>BM3</sub> (L75A/F87I/MERO1). B) Comparison of the yield of **12** catalyzed by optimal P450<sub>BM3</sub> (L75A/F87I) with various co-solvents in three different concentrations. C) Comparison of the yield of **12** in a range of concentrations of DMF.

## 2. Materials and methods

All reactions were carried out under an argon atmosphere with dry solvents under anhydrous conditions, unless otherwise noted. Anhydrous THF was distilled from sodium-benzophenone, dichloroethane and dichloromethane were distilled from calcium hydride. Reagents were purchased at the highest commercial quality and used without further purification, unless otherwise stated. The platinum catalysts were synthesized following the procedure outlined by our group recently.<sup>1</sup> Thin-layer chromatography (TLC) was conducted with 0.25 mm Tsingtao silica gel plates (60F-254) and visualized by exposure to UV light (254



nm). Flash column chromatography was performed using Tsingtao silica gel (60, particle size 0.040–0.063 mm).  $^1\text{H}$  NMR (400 MHz and 600 MHz),  $^{13}\text{C}$  NMR (101 MHz and 151 MHz) spectra were recorded on a Bruker AV III HD spectrometer, and were reported in terms of chemical shift relative to residual  $\text{CDCl}_3$  ( $\delta$  7.26 and  $\delta$  77.16 ppm, respectively) and  $(\text{CD}_3)_2\text{CO}$  ( $\delta$  2.05 and  $\delta$  29.84 ppm, respectively). Data for  $^1\text{H}$  NMR spectra are reported as follows: chemical shift ( $\delta$  ppm) (multiplicity, coupling constant (Hz), integration). Abbreviations are used as follows: s = singlet, br = broad singlet, d = doublet, t = triplet, q = quartet, m = complex multiplet. Data for  $^{13}\text{C}$  NMR spectra are reported in terms of chemical shift. High-resolution mass spectra (HRMS) data was obtained by using Thermo Scientific™ Q Exactive™ Quadrupole-Orbitrap Mass Spectrometer.

### 3. Heterologous biosynthesis of drimenol

#### 3.1 Strains and plasmids

*Escherichia coli* DH5 $\alpha$  cells were used for molecular cloning and site-directed mutagenesis. *E. coli* BL21(DE3) and MG1655(DE3) cells were used for protein expression and microbial production.

The previously reported plasmids pACYCDuet-T1B1 harboring the MVA pathway genes and pETDuet-ERG20 were used for producing C5 building blocks isopentenyl diphosphate (IPP) and dimethylallyl diphosphate (DMAPP) and linear C15 precursor farnesyl diphosphate (FPP), respectively.<sup>2</sup> Four genes encoding drimenol synthase (*PhDS*, *VoDS*, *AsDMS* and *DrtB*) were codon-optimized and synthesized by GenScript (Nanjing, China) and cloned into the multiple cloning site 2 (MCS2) of pETDuet-ERG20 with NdeI/BglII. Besides, the truncated form of *DrtB* with C' terminal 53 amino acid residues removal was constructed by using quick-change strategy to provide the plasmid pETDuet-ERG20-DrtB-CD53.

For metabolic engineering of drimenol production, a second copy of the *mvaA* and *idi* genes were cloned into pACYCDuet-T1B1 with EcoRI/SacI and pETDuet-ERG20-DrtB with BamHI/EcoRI restriction site, respectively. Briefly, the *mvaA* gene was amplified from pACYCDuet-T1B1 as template and cloned into pET28a(+) with NcoI/XhoI restriction site to provide pET28a-*mvaA*, from which the *mvaA* gene along with flanking T7 terminator was amplified and cloned into pACYCDuet-T1B1 with EcoRI/SacI restriction site to provide pACYCDuet-T1B1-*mvaA*. The *idi* gene from *E. coli* was codon-optimized and synthesized by GenScript (Nanjing, China) and cloned into the MCS1 of pETDuet-ERG20-DrtB with BamHI/EcoRI restriction site to provide pETDuet-ERG20-EcIDI-DrtB.

For multienzymes assembly, top MVA pathway enzymes (*AtoB*, *mvaS* and *mvaA*) were assembled by scaffold-free SpyTag/SpyCatcher and SnoopTag/SnoopCatcher pair with ratio of 1:2:2 assembly (namely T-ab). Cross-linking of MVA-drimenol pathway enzymes (ERG20, EcIDI and *DrtB*) were utilized an engineered caveolin-1 isoform beta ( $\beta$ -Cav1) as scaffold along with covalent conjugation via SnoopTag/SnoopCatcher pair and another covalent bonds and noncovalent interactions based on NGCatcher, NGTag and RK (Arginine/Lysine) tails (namely C-ab). The SpyTag-SpyTag-SnoopTag-SnoopTag, SpyCatcher, SnoopCatcher, NGCatcher-rbs-NGTag-SnoopTag- $\beta$ -Cav1 fragments were codon-optimized and synthesized by GenScript (Nanjing, China). The *atoB*\_tail-SpyTag-SpyTag-SnoopTag-SnoopTag-rbs-*mvaS*-SpyCatcher and rbs-*mvaA*-SnoopCatcher fragments were constructed by overlap-extension PCR and assembled with vector pACYCDuet-*atoB*-B1 by seamless joining to provide pACYCDuet-T-ab-B1. The

RK-ERG20-RK, rbs-EcIDI-NGCatcher, rbs-NGTag-SnoopTag- $\beta$ -Cav1 and DrtB-SnoopCatcher fragments were constructed by overlap-extension PCR. The front three fragments were assembled by seamless joining and cloned into the MCS1 of pETDuet-1 with NcoI/SacI restriction site. The MCS2 of this resulting plasmid was inserted by the DrtB-SnoopCatcher fragment with NdeI/XhoI restriction site.

The sequence information of enzymes and multienzymes assembly modules used in this study are shown below. The primers used for heterologous biosynthesis of drimenol are listed in Table S1.

### **3.2 Protein and codon-optimized nucleotide sequences of enzymes and multienzymes assembly modules used in this study.**

#### **PhDS (559 aa, 1680 bp)**

```
MSTAVNVPSAVRPADKRPIASFHPSPWGDYFLKYVPCDQVTQAKMEDEVKKEEDVKKELRKLAKAVGKPLELLNFIDVVERL
GVGYRLEQEIEDLVQAI FDNDFGVDFDLYHTSLWFRLLRQHGFHVSCDVFVKFKGRNGRFKDSLASDVKGILGLYEASHVR
THGDDTLDEALVFTTTHLKAVVTNQP NHPLVPQVTHALMQPYHKGMPRLESRHFIAFYEKDPYHDKTLLKFGLDFNLVQALH
KKELKDL SRWKKDLDMHAKMPFPSRDRVPEGYFWTLGPFYEPQFALCRKFFLQVFKVTSIVDDIYDAYGTIDELTAFTKAAER
WDRSCLDELPEYMKVSYASLIDTFEEFERDLAPQGRSWSVKYAREEMIQMCRVYYQEAKWCHEKYSPTCDEYLEKASIVSFGY
NLGTVVCF LGMGDVATKEAFEWARGNPKVVRAAGIIGRLMDDIGSHHFEQGRDHVPSAVECYIRQHGVEVTAQRELKGRVES
SWKDINEMMLKPYMMPKPLLTRILNECRIVDVIYKGEDSYTFSNTTMKKNISHILTDPIPI
atgagcaccgcggtgaacgtgccgagcgcggtgctccggcggacaaacgtccgatcgcgagctttcaccgagcccgtggg
tgactacttctgaaatatgtgccgtgcatcaggttaccaagcgaagatggaggacgaagtgaagaaagttgaggaagatg
tgaagaaagagctgctgaagctggcgaagcgggttgtaaacctgagctgctgaactcattgacgtggtgaacgtctg
gggtgttgctaccgtctggagcaggaaatcgaggatctggtgcaagcgattttcgacaacgataagtttgcggtgacgaatt
cgatctgtatcacaccagcctgtggtttcgtctgctgctcagcagcgtttccacgtgagctgagcagcttttcggcaagttta
aaggctgtaacggccggttttaagacagcctggcgagcagatgtgaagggatcctggcctgtacgaggcgagccacgttctgt
accacggtgacgataccctggatgaagcgtggtgttaccaccacccacctgaaagcgggtggttaccacccaaccgaacca
cccgtggtgcccaggttaccacgcgctgatgcaaccgtaccacaagggatgcccgcgtctggagagccgtcacttcattg
cgttttacgaaaaggaccgtatcacgataaaaccctgctgaagtttgcaaacctggacttcaacctggtgcaagcgtgcac
aagaaagagctgaaggatctgagccgttggtggaagacctggatgatgacgcgaagatgccgtttccgagccgtgaccgtgt
tccggagggttacttctggaccctgggcccgttttatgaaccgcagttcgcgctgtgcccgtaaattctttctgcaagtgttta
aggttaccagcatcgtggacgatatttacgacgcgatggtaccatcgatgagctgaccgcgttcaccaaagcggcggaacgt
tgggaccgtagctgcctggatgaactgccggagtagcatgaaagtttagctatgagcgcctgatcgacaccttcgaggaatttga
```

acgtgatctggcgccgcagggccgtagctggagcgtgaaatacgcgcgtgaggaaatgattcagatgtgccgtgttactatc  
aagaagcgaagtgggtgccacagaaaatacagcccacctgcgacgaatatctggagaaggcgagcatcgtgagctttggttat  
aacctgggcaccgtggtttgcttcctgggtatggcgatggttgcgaccaaagaagcgtttgagtgggcgctggtaaccgaa  
ggtggttcgtgcgggggtatcattggccgtctgatggacgatatcggtagccaccactttgagcaaggtcgtgaccatgtgc  
cgagcgcggttgaatgctacattcgtcagcacgggtgtggatgaagttaccgcgcaacgtgagctgggcaaactggttgaagc  
agctggaaggacatcaacgaaatgatgctgaagccgtatatgatgccgaaaccgctgctgaccgctattctgaacgagtccg  
tatcgtggacgttatttacaagggcgaagatagctataccttcagcaacaccaccatgaagaaaaacatcagccacattctga  
ccgatccgatcccgatttaa

**VoDS (556 aa, 1671 bp)**

MSTALNSEHETVRPLASFQ PSTWGD LFI SYSEDSQLKEVYGKEHECLKQQVKTMLLDVTNYRISEKIAFINTLERLGVSHEFE  
NEIEGLLHQMFDAHSKFQDGIQHFDLFTLGIYFRILRQHGYRIYCDVFNKLDKSNNEFKKELKEDAIGLLSLYEATQVRAHAE  
EILDEALIFTKAQLESIAATSSLSPFVEKQITHALVQALHKGIPRVESRHFISVYEEDPDKNDLLRFSKIDYNIVQMLHKQE  
LCHISKWWRDSELETKLTYARNRVAECFLWTL CVYHEPKYSPARLLLGLKINI ISCTDDTYDAYGTLEEVQIFTDVIQRLDRS  
SMEQLPDYMKILYKAVLDLDFDEVEVQLSNQETNNTYRMAYAKEELKAI AKCYEKEHIWFRKCHVPPFEEYLENAVVSIGNRLA  
VTF SFLGMDQVA AVEAF EWAKTDPKMVKSCGKVLRLVDDVMSHEEEDVRGHVATGVECYMKEHGVSREEAVVEFYKRVEYAWK  
DVNEEFITPNHLHIDLNRVNLNTRIADVVKFEDGYTHPEKTLKHHIMALFVDPVPI

atgagcaccgcgctgaacagcgaacacgagaccgttcgtccgctggcgagcttccagccgagcacctggggcgacctgtttat  
cagctacagcgaagatagccaactgaaagaggtgtatggtaaagaacacgagtgacctgaagcagcaagttaaaaccatgctgc  
tgacgtgaccaactatcgtattagcgaagatcgcgttcattaacaccctggagcgtctggcggttagccacgaatttgag  
aacgaaatcgagggctctgctgcaccagatggtcgtatgctgcacagcaaatccaggacggtattcaacacttcgacctgttcac  
cctgggcatctactttcgtattctgctcaacacggttaccgtatctattgcgacgttttcaacaagctgaaggatagcaaca  
acgaattcaagaaagaactgaaagaggacgcgattggcctgctgagcctgtatgaagcgaccaagtgcgtgctgcgatgaggag  
gaaatcctggatgaagcgtgatthttcaccaaagcgcaactggagagcattgcgggcaccagcagcctgagcccgtttgttga  
aaagcagattaccacgcgctgggtgcaagcgtgcacaaaggtatcccgcgtggtgagagccgtcacttcattagcgtgtacg  
aggaagaccggataagaacgacctgctgctgctgtttcagcaagatcgattacaacatcgttcagatgctgcacaagcaagaa  
ctgtgccacatcagcaaatgggtggcgtgacagcgaactggagaccaagctgacctacgcgcgtaaccgtgttgcggaatgctt  
cctgtggaccctgtgctgtaccacgagccgaagtatagccggcgctctgctgctgggcaaactgatcaacatcattagct  
gcaccgacgatacctacgacgcgtatggtaccctggaggaagttcagatcttcaccgacgtgattcaacgtctggatcgtagc  
agcatggaacagctgccgattacatgaagattctgtataaagcgggtgctggacctgtttgatgaagttgaggtgcagctgag

caaccaagagaccaacaacacctaccgtatggcgatgcgaaagaggagctgaaagcgatcggaagtgtacgaaaaagagc  
acattttgggtccgtaaatgccacgttccgcccgtttgaggaatatctggagaacgcggtggttagcatcggcaaccgtctggcg  
gtgaccttcagctttctgggtatggaccaagtggcggcggttgaagcgttcgagtgggcgaagaccgatccgaagatggttaa  
aagctgcggcgaaagtgtcgtcgtctggtggacgatgttatgagccacgaggaagaggacgtgctggtgacgttgcgaccggcg  
tggaatgctacatgaaggagcacggtgttagccgtgaagaggcggtggttgaattctacaagcgtgttgagtatgctggtgaaa  
gacgtgaacgaagagtttatcaccccgaaaccacctgcacattgatctgctgaaccgtgtgctgaacctgacctgatcgcgga  
cgtggtttacaaaattcgaagatggctataccacccggagaagaccctgaaacaccacatcatggcgtgtttggtgatccgg  
ttccgatttaa

**AsDMS (536 aa, 1611 bp)**

MDFSSNVSPINQNNMKEVLTPELITSLQELSQLDRYDTIVFDLGDVLLHWDVSVHFTSETKGIDDVRKMKVHPVWQDLEKGLI  
NQEFALTALSCELETPCSKLKEMLELSIASLQVNPMLVEVLRLVHKKDKQIYCLSNVDLESFSYLYKQDFWKYFDGIYVSAL  
LQLRKNPDI FQYL ISSASINTKSTIFIDDKSENLQEAA NFGISTLKYNKDNFEYTAIEGGWPIPLQNMTPEIHKKRTLGEDY  
LNLRLRFKFPFCKSFVSNVELIGGEDFSKEIFSTAVILHSYTSPLDDI IASMCHEILNHDGQNKLRWCFYKNEARPDNFPDDL  
DTTSMVLSFLLNHNKLTIEKII PVAEQMIANRNEEGII QVYFDDNRPRIDAIVAINVLYLMHQIGYGERKELKETEAFVDFDL  
ISKEYLKGTRYYPAPDVFLFFLSRLVDFPDQFEKFKPLTEMLITRVNCSTFPLERLR I IALKKLGI VNRVDFL KLLDTQL  
ADGGWPVYGLFIAPRSNTYFGSRELSTAFALHILS

atggatttttcaagtaatgtatctcccataaaacaaaaacaacatgaaagaagtcctcacgccggaactgatcacgagcctgca  
agagtgtcgcagatcctggatcgttatgataccatcgatctcgcacctggcgatgtgttctgctgattgggacagcgttcatt  
ttacctctgagaccaaaggtattgacgacgtgcgtaagatggtgaaacaccgggtgtggcaggatctggagaagggcctgatt  
aaccaggagtttgcttgaccggttgagctgcgaactggaaaccccgtagcaaatgaaagagatgctggaactgtctat  
tgcgagcctgcaagttaatccattaatggctcgaggtcctgcggtacttcacaaaaaggacaagcaaatctactgcctgtcca  
acgtggacttgagagcttttcatatctgtacaaacaatcgtattctgaaatactttgacggcatttacgtgtcagctttg  
ttacaactgcgcaagccgaatccggacatcttcagatctgatcagcagcgcacattaacacgaagtccacgatcttc  
cgatgacaaaagcgagaacctgcaagaagcagctaatttcggtatcagaccctgaagtataacaaggataatctcgagtaca  
ccgcatcgaggtggtggccgatcccgtgcaaaacatgaccccgagatacataagaaacgtaccctgggtgaagattat  
ctgaacctgagactgctgtaagttcccggttttgaagagcttcggtttccaataacggttgattggtggcgtggaagatttag  
caaagagattttcagtaactgcggttatcctccacagctacacgtctctgcccgatgacatcatcgcgtctatgtgccatgaaa  
tcctgaaccacgatggtcagaataaattgcgctggtggtttttataagaacgaagcgcgtccagataatctccggacgacctg  
gatactaccagcatggttttatcgttcctgctgaaccacaataaacttaccattgagaagatcatccgggttgagaacagat

gattgcaaccgtaatgaggagggcatcattcaggtgtacttcgacgacaaccgcccgcgtattgatgcaatcgtggccatca  
acgtcctgtacttaatgcatcagattggttatggtgagcgcaaagagttgaaggagactgaagcgttcgtgttcgacttcctc  
atctccaaagagtatctgaagggtacacggttactaccggcaccggacgttttctgtttttctgagccgtctggttga  
cttcccagatcagtttgaaaaattccacaagcgttgaccgagatgctgatcaccggtggaactgctctacgtttccgttgg  
aacgtgctctcgtattatagcgtgaagaagctgggcatgttaaccgctggacttcttaaagctgctggacaccagctt  
gccgatggcgggttgccgtgtttacggcctttttattgctccgcttccaatacctattttgtagcagagaactgagtaccgc  
gttgctttggaagcgtgcacatcttgcgtaa

**DrtB (528 aa, 1587 bp)**

MVRALILDLDGDLFNWDAPASTPISRKTLGQMLHSEIWGEYERGHLTEDEAYNALAKRYSCEAKDVAHTFVLARESLRLDTKF  
KTFLLQTLKQNANGSLRVYGMSNISKPDFEVLLGKADDWTLFDKIFPSGHVGMKRPDLAFFRYVLKDISTPVEDVVFVDDNLDN  
VTSARSLGMRSVLFHKKDEVQRQLTNI FGSPAERGLELYLSANKTNLQSATTTDIPIQDNFGQLLILEATEDPSLVRMEPGKRT  
WNFFIGSPSLTTDTFPDDLDTTSLALSIVPTSPDVVNSVIDEII SRRDKGIVPTYFDNTRPRVDPIVCVNVLSMFAKYGREH  
DLPATVAWVRDVLVYHRAYLGGTRYGSAEAFLEFFTRFVRNLRPGTLKQDLHALLSERVRERLNTPVDALALSMRIQACHALG  
FDAPADIATLITMQDEDEGGWPAAVIYKYGAGGLGITNRGVSTAFVAVKAITGSPVKETETNIGGDGARAVSAMSLSLEARRLQPI S  
SVGDWVRFIIASLHVHLAWLWNVLLLSKVV

atggttaagggctctaataattggacttaggagatgtcctcttcaactgggatgcgccggctagcaccggatcagccgtaaaac  
gctgggcccagatgctgcactccgagatttgggggtgaatatgaacgtggtcatctgaccgaagacgaggcctataacgcgctag  
cgaagcgtacagctgcgaagcgaaggacgtcgcacataccttctgtgttgccgagagagcttgccctggataccaaattt  
aaaaccttctgcaaaccttaaagcaaaacgcgaacggttcaactgcgctgtatggcatgagcaatatttgcgaagccggactt  
tgaagtttctgctgggcaaagctgatgactggaccttcttcgataaaatcttcccagcggtcacgtgggcatgcgaaagccgg  
acttggcgttcttctgttacgtcttgaaagacatctccacgcgggtggaagacgttgtttctgtagacgataacttggacaac  
gtgacgtcggcccgtagcctgggtatgagaagcgttcttttccacaagaaagatgaggttcagcgtcagttgacgaatattt  
tggtagcccggcagagcgcggtctggagtacctgtctgcgaataaaactaaccttcaaagcgcgaccacgactgacatcccga  
tccagacaatttctgccaactgctgatcctggaggctaccgaggaccgctctctggttcgtatggaaccgggtaaaagaaca  
tggaatttttctattggctctccgagcctgaccaccgatacttttccggatgacttagataaccaccagtcttgcgctgtccat  
tgttccgacttcgccgacgtggtgaacagcgtgattgacgagatcatcagtcgtcgcgataaagacggcatcgtgccgacgt  
acttcgacaacaccgctcctcgtgtagaccggattgtttgcgttaacgtgttgagcatgtttgcgaaatacgggctgagcac  
gatctgccggcaacagttgcgtgggtctgtgatgtctgatcatcgtgcctacctgggcggtaccgctactatggttccgc  
cgaagcatttctgttcttcttccaccggtttgttcgtaaatctgcgtccaggtaacgtgaagcaggatttgcagccctcctgt

ccgaacgcgtgcgcgagcgcttaaataccccgggtgatgcactggctttgtctatgcgtattcaggcatgtcatgcgctgggt  
tttgacgcgccagcgatatcgcgaccctgattaccatgcaggatgaggatggcggttggccggcgagtcacataagta  
cggcgcggttggtctgggcatcaccaaccgtggtgtttctaccgcattcgcagttaaagcaattaccggttccccggtcaaga  
ccgaaaccaatatcgggtggcgagcggcgtcgtgcggtgagcgtatgagcagccttgaagctcgtcgtcttcaaccaattagc  
agcgtggcgattgggtgcgcttcatcattgctagcctgcacggtcacctggcggtggctgtggaacgtgctgttgcgtccaa  
gggtgtataa

**EclDI (182 aa, 549 bp)**

MQTEHVILLNAQGVPTGTLEKYAAHTADTRLHLAFSSWLFNAKGQLLVTRRALSKKAWPGVWTVNSVCGHPQLGESNEDAVIRR  
CRYELGVEITPPESIYPDFRYRATDPSGIVENEVCPVFAARTTSALQINDDEVMDYQWCDLADVLHGIDATPWAFSPWMVQA  
TNREARKRLSAFTQLK

atgcagaccgagcacgtgatcctgctgaacgcgcaaggtgtccgaccggcaccctggaaaagtatggcggcgacaccgcgga  
caccgtctgcacctggcgttcagcagctggctgtttaacgcgaagggtcagctgctggtgaccctcgtgcgctgagcaaga  
aagcgtggccggcggtgtggaccaacagcgtttgcggtcaccgcgaactggcgagagcaacgaagatgcggtgatccgtcgt  
tgccgttacgagctgggtgttgaatcaccgcggagagcatttaccggacttccgttatcgtgcgaccgatccgagcgg  
catcgtggagaacgaagtgtgcccggttttgcggcgcgtaccaccagcgcgctgcaataacgacgatgaggtgatggact  
atcaatggtgcgacctggcggtatgttctgcacggtattgatgcgacccctggcggttcagcccggtgatggttatgcagcgg  
accaaccgtgaagcgcgtaagcgtctgagcgcggtttaccaactgaaataa

**RK-ERG20-RK (RKRKRK-CDS-RKRK)**

MRKRKRKASEKEIRRERFLNVFPKLVEELNASLLAYGMPKEACDWYAHS LNYNTPGGKLNRLSVVDTYAILSNKTVEQLGQE  
EYKVAIIGWCIELLQAYFLVADDMMDKSITRRGQPCWYKVPEVGEIAINDAFMLEAAIYKLLKSHFRNEKYIIDITELFHEV  
TFQTELGQLMDLITAPEDKVDLSKFSLKKHSFIVTFKTAYYSFYLPVALAMYVAGITDEKDLKQARDVLIPLGEYFQIQDDYL  
DCFGTPEQIGKIGTDIQDNKCSWVINKALELASAEQRKTLDENYGGKDSVAEAKCKKIFNDLKIEQLYHEYEESIAKDLKAKI  
SQVDESRGFKADVLTAFLNKVYKRSKRKRK

atgcgtaaacgtaaacgtaaacgagcagagaaagaaatccgctcgtgagcgtttcctgaacgtgtttccgaagctgggtgagga  
actgaacgcgagcctgctggcgtacggtatgccgaaagaagcgtgcgactggtacgcgcacagcctgaactataacacccccg  
gtggcaagctgaaccgtggcctgagcgtggttgatacctacgcgattctgagcaaaaaaccgtggagcagctgggtcaagag  
gaatatgaaaaggttgcgatcctgggctggtgcattgagctgctgcaagcgtacttccctgggtggcgacgatgatggacaa  
aagcatcaccgcgtggtcaaccgtgctggtataaggtgccggaagtgggcgaaatcgcgattaacgatgcgttcatgctgg

aggcggcgatttacaagctgctgaaaagccacttccgtaacgaaaagtactacatcgacattaccgagctgtccacgaagtt  
acctttcagaccgagctgggtcaactgatggatctgatcaccgcgccggaagacaaaagtgatctgagcaagttcagcctgaa  
gaaacacagcttcattgttacctttaagaccgctactatagcttttacctgcccgggtggcgtggcgatgtatggtgcgggca  
tcaccgacgagaaggatctgaaacaggcgcgtgacgtgctgatcccgctgggtgaatacttcagattcaagacgattatctg  
gattgctttggcaccgccggagcagatcggtaaaattggcaccgacatccaagataacaaatgcagctgggtgattaacaaggc  
gctggagctggcgagcgcggaacagcgtgaagaccctggacgagaactatggtaagaaagatagcgttgcggaagcgaatgca  
agaaaatctttaacgacctgaagattgagcagctgtaccacgaatatgaggaaagcatcggaaggacctgaaggcgaaaatt  
agccaagttgacgaaagccgtggcttcaaggcggatgtgctgaccgctttctgaacaagttttacaaacgtagcaagcgtaa  
acgtaaataa

### **SpyTag**

AHIVMVDAYKPTK

gcccatattgtcatggttgatgcatacaagccgacgaag

### **SpyCatcher**

AMVDTL SGLSSEQQSGDMTIEEDSATHIKFSKRDEDGKELAGATMELRDSSGKTIISTWISDGQVKDFYLYPGKYTFVETAAP  
DGYEVATAITFTVNEQQQVTVNGKATKGDAMI

gccatggttgataccttatcaggtttatcaagtgagcaaggtcagtcgggtgatatgacaattgaagaagatagtgctacca  
tattaaattctcaaacgtgatgaggacggcaagagtttagctgggtgcaactatggagttgcgtgattcatctggtaaaacta  
ttagtacatggatttcagatggacaagtgaagatttctacctgtatccaggaaaatatacatttgcgaaaccgcagcacca  
gacggttatgaggtagcaactgctattacctttacagttaatgagcaaggtcaggttactgtaaattggcaagcaactaaagg  
tgacgctcatatt

### **NGTag**

RGAHIVMVDAYKPTK

cgcgggcgcgacatcgttatgggtgatgcataaaaccacccaaa

### **NGCatcher**

AMVDTL SGLSSEQQSGDMTIEEDDATHIEFSKRDEDGKELPGATMELRDSSGKTIISTWISDGQVKDFYLEPGEYTFVETEAP  
DGYEVDDAITFTVNEDGQVTEEGKATKGDAMI

gcaatggttgatacactgagtggtctgagcagcgaacaggggcagagcggagatatgaccattgaagaagatgatgcaacca



tattgaattcagcaaacgcgatgaggacggtaaagaactgccgggggcaaccatggaactgcgcgatagcagcggtaaaacaa  
ttagcacctggattagcgatggacaggtgaaagatTTTTTaccTggaaccaggagaatacacattTgtggaaaccgaagcacca  
gacggctatgaagttgatgatgcaattacctTTaccgtaaacgaagatggacaggtgaccgaagaaggaaaagcaaccaaagg  
agatgcacatatc

### **SnoopTag**

ASKLGDIEFIKVNK

gctagcaaaactggcgatattgaatttattaaagtgaacaaa

### **SnoopCatcher**

ASKPLRGAVFSLQKQHPDYPDIYGAIDQNGTYQNVRTGEDGKLTfKNLSDGKYRLFENSEPAGYKPVQNKPIVAFQIVNGEVR  
DVTsIVPQDIPATYEFtNGKHytNEPIPPK

gctagcaagccgctgCGTgGtGCCgtgtttagcctgcagaaacagcatcccgactatcccgatatctatggcgcgattgatca  
gaatgggacctatcaaaatgtgCGTaccggcgaagatggtaaaactgaccttaagaatctgagcgcgatggcaaatatcgCctgt  
ttgaaaatagcgaaccgctggctataaacgggtgcagaataagccgattgtggcgtttcagattgtgaatggcgaagtgcgt  
gatgtgaccagcattgtgCGcaggatattccggctacatatgaatttaccAACggtaaacattatatcaccaatgaaccgat  
accgccgaaa

### **β-Cav1**

MADELSEKQVYDAHTKEIDLvNRDPKHLNDDVVKIDfEDVIAEPEGThSFDGIWKASFTTfTVTKYWFYRLLSALFGIPMALI  
WGIYFailsSFLHIWAVVPCIKSFLIEIQcISRvYSIYVHTVCDPLFEAVGKIFSNVRINLQKEI

atggcgcgatgaactgagcgcgaaacaggtttatgatgcccacaccaaggagatcgacttggttaaccgtgacccaaagcacct  
gaatgatgacgtggTgaagatcgacttcgaggacgtcatcgccgaaccggaaggcactcatagcttcgacggcatttgaaag  
cgagcttcaccaccttcaccgTtaccaaatactggTTTTatcgTcttctgagTgcattgttcggcatcccgatggcgttaatc  
tggggTatctatTTTgcaattctgTccttctgcataTTTggcggtggttcogTgcataagTccttcttgatcgagatcca  
gtgtattagccgctgtacagcatttacgtgcacacggTTTgtgatccgctgTTTgaagctgtgggTaaaatTTTtagcaatg  
ttcgtattaacctgcaaaaagagatctaa

### **3.3 Multienzymes assembly modules of top MVA pathway (MCS1 of pACYCDuet-1 plasmid)**

AtoB-**SpyTag-SpyTag-SnoopTag-SnoopTag**-rbs-mvaS-**SpyCatcher**-rbs-mvaA-**SnoopCatcher** ([linker](#))

ATGAAGAACTGCGTGATTGTTAGCGCGGTTTCGTACCGCGATTGGCAGCTTCAACGGTAGCCTGGCGAGCACCAGCGGATCGA





### 3.4 Multienzymes assembly modules of cross-linking MVA-drimenol synthesis pathway (pETDuet-1)

MCS1: RK-ERG20-RK-rbs-EclDI-NGCatcher-rbs-NGTag-SnoopTag-β-Cav1 (linker)

ATGCGTAAACGTAAACGTAAAGCGAGCGAGAAAGAAATCCGTCGTGAGCGTTTCTGAACGTGTTTCCGAAGCTGGTTGAGGA  
ACTGAACCGGAGCCTGCTGGCGTACGGTATGCCGAAAGAAGCGTGCGACTGGTACGCGCACAGCCTGAACTATAACACCCCGG  
GTGGCAAGCTGAACCGTGGCCTGAGCGTGGTTGATACCTACGCGATTCTGAGCAACAAAACCGTGGAGCAGCTGGGTCAAGAG  
GAATATGAAAAGGTTGCGATCCTGGGCTGGTGCATTGAGCTGCTGCAAGCGTACTTCTGGTGGCGGACGATATGATGGACAA  
AAGCATCACCCGTCGTGGTCAACCGTGTGTATAAGGTGCCGGAAGTGGCGGAAATCGCGATTAACGATGCGTTCATGCTGG  
AGGCGGCGATTTACAAGCTGCTGAAAAGCCACTTCCGTAACGAAAAGTACTACATCGACATTACCGAGCTGTTCCACGAAGTT  
ACCTTTCAGACCGAGCTGGGTCAACTGATGGATCTGATCACCGCGCCGGAAGACAAAGTGGATCTGAGCAAGTTCAGCCTGAA  
GAAACACAGCTTCATTGTTACCTTTAAGACCGCTACTATAGCTTTTACCTGCCGGTGGCGCTGGCGATGTATGTTGCGGGCA  
TCACCGACGAGAAGGATCTGAAACAGGCGGTGACGTGCTGATCCCGTGGGTGAATACTTCCAGATTCAGACGATTATCTG  
GATTGCTTTGGCACCCCGGAGCAGATCGGTAAAATTGGCACCGACATCCAAGATAACAAATGCAGCTGGGTGATTAACAAGGC  
GCTGGAGCTGGCGAGCGCGGAACAGCGTAAGACCCTGGACGAGAACTATGGTAAGAAAAGATAGCGTTGCCGGAAGCGAAATGCA  
AGAAAATCTTTAACGACCTGAAGATTGAGCAGCTGTACCACGAATATGAGGAAAGCATCGCGAAGGACCTGAAGGCGAAAAT  
AGCCAAGTTGACGAAAGCCGTGGCTTCAAGGCGGATGTGCTGACCGCGTTTCTGAACAAGGTTTACAAACGTAGCAAGCGTAA  
ACGTAAATAAggatcggatctaggagtaatcataATGCAGACCGAGCAGTGATCCTGCTGAACGCGCAAGGTGTTCCGACC  
GGCACCTGGAAAAGTATGCGGCGCACACCGCGGACACCCGTCTGCACCTGGCGTTCAGCAGCTGGCTGTTTAAACGCGAAGGG  
TCAGCTGCTGGTGACCCGTCGTGCGCTGAGCAAGAAAGCGTGGCCGGGCGTGTGGACCAACAGCGTTTGGCGTACCCGCAAC  
TGGGCGAGAGCAACGAAGATGCGGTGATCCGTGCTTGCCTTACGAGCTGGGTGTTGAAATCACCCCGCCGAGAGCATTTC  
CCGACTTCCGTTATCGTGCACCGATCCGAGCGGCATCGTGAGAAACGAAGTGTGCCCGGTTTTTGGCGCGCTACCACCAG  
CGCGCTGCAAATTAACGACGATGAGGTGATGGACTATCAATGGTGCACCTGGCGGATGTCTGCACGGTATTGATGCGACCC  
CGTGGGCGTTCAGCCCGTGGATGGTTATGCAGGCGACCAACCGTGAAGCGCGTAAGCGTCTGAGCGCGTTTACCCAACTGAAA  
GGTGGTGGTGGTTCAGTGGTGGTGGTGTGGTGAATGGTGGATACACTGAGTGGTCTGAGCAGCGAACAGGGGCAGAGCGG  
AGATATGACCATTGAAGAAGATGATGCAACCCATATTGAATTGAGCAACCGGATGAGGACGGTAAAGAACTGCCGGGGCAA  
CCATGGAAGTGCAGGATAGCAGCGGTAAAACAATTAGCACCTGGATTAGCGATGGACAGGTGAAAGATTTTTACCTGGAACCA  
GGAGAATACACATTTGTGAAACCGAAGCACCAGACGGCTATGAAGTTGATGATGCAATTACCTTTACCGTAAACGAAGATGG  
ACAGGTGACCGAAGAAGGAAAAGCAACCAAAGGAGATGCACATATCTAAgaattcaggaggaaaacatcATGAGGGGGGCTCA  
CATAGTAATGGTTGATGCGTACAAGCCGACGAAGGGTGGTGGCTCTGGTGGCGGGGGCTGCGGTGCTTCGAAACTGGGTGATA  
TTGAATTTATTAAGGTCAACAAAGGCGCGGTTCTGGCGGTGGTGGTGGCGGTATGGCGGATGAACTGAGCGAGAAACAGGTT

TATGATGCCACACCAAGGAGATCGACTTGGTTAACCGTGACCCAAAGCACCTGAATGATGACGTGGTGAAGATCGACTTCGA  
GGACGTCATCGCCGAACCGGAAGGCACTCATAGCTTCGACGGCATTGGAAAGCGAGCTTCACCACCTTCACCGTTACCAAAT  
ACTGGTTTTATCGTCTTCTGAGTGCATTGTTCCGCATCCCGATGGCGTTAATCTGGGGTATCTATTTTGCAATTCTGTCTTC  
CTGCATATTTGGGCGGTGGTCCGTGCATCAAGTCCTTCTTGATCGAGATCCAGTGTATTAGCCGCGTGTACAGCATTTACGT  
GCACACGGTTTTGTGATCCGCTGTTTGAAGCTGTGGGTAAAATTTTTAGCAATGTTCTGATTAACTGCAAAAAGAGATCTAA

**MCS2: DrtB-SnoopCatcher (linker)**

ATGGTAAGGGCTCTAATATTGGACTTAGGAGATGTCTCTTCAACTGGGATGCGCCGGCTAGCACCCCGATCAGCCGTAAAAC  
GCTGGGCCAGATGCTGCACTCCGAGATTTGGGGTGAATATGAACGTGGTCATCTGACCGAAGACGAGGCCATAACGCGCTAG  
CGAAGCGCTACAGCTGCGAAGCGAAGGACGTGCGACATACCTTCGTGTTGGCGCGGAGAGCTTGCCTGGATACCAAATTT  
AAAACCTTCTGCAAACCTTAAAGCAAAACGCGAACGGTTCCTGCGCGTGTATGGCATGAGCAATATTTGAAAGCCGGACTT  
TGAAGTTTTGCTGGGCAAAGCTGATGACTGGACCTTGTTCGATAAAAATCTTCCGAGCGGTCACGTGGGCATGCGAAAGCCGG  
ACTTGGCGTTCTTTTCGTTACGTCTTGAAAGACATCTCCACGCCGGTGAAGACGTTGTTTTCGTAGACGATAACTTGGACAAC  
GTGACGTCGGCCCGTAGCCTGGGTATGAGAAGCGTTCTTTTTTACAAGAAAGATGAGGTTGAGCGTCAGTTGACGAATATTTT  
TGGTAGCCCGGCAGAGCGCGGTCTGGAGTACCTGTCTGCGAATAAACTAACCTTCAAAGCGCGACCACGACTGACATCCCGA  
TCCAGGACAATTTTCGGCCAACTGCTGATCCTGGAGGCTACCGAGGACCCGCTCTCTGGTTCGTATGGAACCGGGTAAAAGAACA  
TGAATTTTTTTCATTGGCTCTCCGAGCCTGACCACCGATACTTTTCCGGATGACTTAGATACCACAGTCTTGCCTGTCCAT  
TGTTCCGACTTCGCCGGACGTGGTGAACAGCGTGATTGACGAGATCATCAGTCGTGCGGATAAAGACGGCATCGTGCCGACGT  
ACTTCGACAACACCCGTCCTCGTGTAGACCCGATTGTTTTCGTTAACGTGTTGAGCATGTTTGCGAAATACGGGCGTGAGCAC  
GATCTGCCGGCAACAGTTGCGTGGGTTCGTGATGTGCTGTATCATCGTGCTACCTGGGCGGTACCCGCTACTATGGTTCCGC  
CGAAGCATTTCTGTTCTTCTCACCCGTTTTGTTTCGTAATCTGCGTCCAGGTACGCTGAAGCAGGATTTGCACGCCCTCCTGT  
CCGAACGCGTGCGGAGCGCTTAAATACCCCGTTGATGCACTGGCTTTGTCTATGCGTATTCAGGCATGTCATGCGCTGGGT  
TTTGACGCGCCAGCGGATATCGCGACCCTGATTACCATGCAGGATGAGGATGGCGGTTGGCCGGCGGCAGTCATCTATAAGTA  
CGGCGCGGGTGGTCTGGGCATCACCAACCGTGGTGTCTTACCGCATTCGCAGTTAAAGCAATTACCGGTTCCCCGGTCAAGA  
CCGAAACCAATATCGGTGGCGACGGCGCTCGTGCGGTGAGCGCTATGAGCAGCCTTGAAGCTCGTCGCTTCAACCAATTAGC  
AGCGTGGGCGATTGGGTGCGCTTCATCATTTGCTAGCCTGCACGTTACCTGGCGTGGCTGTGGAACGTGCTGTTGCTGTCCAA  
GGTGGTAGGGGGAGGCGGATCAGGTGGGGGAGGTTGTGGCGCTCTAAGCCGTTACGTGGTGCTGTGTTACGCCTGCAGAAGC  
AGCACCCGGACTATCCGGACATCTATGGTGCATTGATCAAAAACGGCACGTACAAAACGTTTCGTACCGGTGAAGATGGCAAG  
CTGACCTTTAAGAATTTGTCCGACGGCAAGTACCGCTGTTCGAAAACAGCGAGCCGGCAGGTTATAAACCGGTCCAGAATAA

ACCGATTGTGGCGTTTTTCAGATCGTAAATGGCGAGGTTTCGTGACGTTACCTCGATCGTGCCGCAAGATATTCCGGCGACCTACG  
AGTTCACTAACGGTAAACATTACATTACCAACGAACCAATCCCGCCTAAATAA

### 3.5 Heterologous biosynthesis of drimenol in *E. coli*

Recombinant plasmids were transformed into *E. coli* BL21(DE3) or MG1655(DE3) strain for drimenol production. A single colony was inoculated into LB medium (1 mL) containing chloramphenicol (34 mg/L) and carbenicillin (50 mg/L) and incubated at 37 °C and 220 rpm overnight. 180 µL of seed culture was inoculated into 9 mL of AM mineral medium containing chloramphenicol (17 mg/L) and carbenicillin (100 mg/L) and incubated at 37 °C and 220 rpm until OD<sub>600</sub> reach 0.5–0.6. The culture was precooled at 4 °C before it was induced with isopropyl β-D-1-thiogalactopyranoside (IPTG, 0.1 mM) and overlaid with 20% (v/v) dodecane. After shaking at 25 °C and 180 rpm for 72 h, the final OD<sub>600</sub> of culture (50-fold dilution) was measured with ultraviolet-visible spectrophotometer and the culture was centrifuged at 48,000g for 10 min. 1 µL of organic layer was diluted to 400-fold with dodecane, and the resulting sample was analyzed by GC-MS. The quantification of product was determined by the external standard method. All assays were performed with three biological replicates.

For large-scale flask fermentation, the optimal recombinant strain (MG1655(DE3) harboring pACYCDuet-T1B1 and pETDuet-ERG20-DrtB) was cultured and enlarged to 1 L AM mineral medium, and the process was same as mentioned above. After 72 h fermentation, the culture was centrifuged at 9,000g for 30 min. The organic phase was separated, and the aqueous phase was extract with ethyl acetate for three times. The resulting samples were dried over anhydrous sodium sulfate and concentrated under reduced pressure. The residue was purified by flash chromatography (silica gel) and eluted with hexane/ethyl acetate (50:1) to afford 1.1 g drimenol as a white powder.

#### GC-MS analysis

GC-MS was performed on a Shimadzu Nexis GC-2030 series GC system equipped with an SH-Rxi-5Sil column (30 m × 0.25 mm × 0.25 µm; Shimadzu) and coupled with a QP2020 NX mass spectrometer. For drimenol, the carrier gas was helium at a constant linear velocity of 40 cm/sec. Injection (1 µL) was in splitless mode with the injector temperature set at 250 °C and the oven temperature was programmed from 80 °C to 170 °C at 20 °C/min (2 min hold), followed by an 8 °C/min ramp to 210 °C, then a 15 °C/min ramp to 300 °C (2 min hold). The identity of the drimenol was confirmed based on the concordance of mass spectrum

with the National Institute of Standards and Technology (NIST) Standard Reference Database (version 2017). For oxidated product of drimenol by P450<sub>BM3</sub> enzyme, the oven temperature program was set from 65 °C to 160 °C at 25°C/min (1 min hold), followed by a 6 °C/min ramp to 230 °C (2 min hold), then a 50 °C/min ramp to 310 °C (2 min hold).

**Table S1.** The primers used for heterologous biosynthesis of drimenol.

| Primer             | Sequence (5'-3')                                                   | Purpose                                                                                      |
|--------------------|--------------------------------------------------------------------|----------------------------------------------------------------------------------------------|
| DrtB-CD53-F        | ACCGAAACCAATATCTAAAGATCTCAAT<br>TGG                                | A plasmid pETDuet-<br>ERG20-DrtB-CD53<br>construction                                        |
| DrtB-CD53-R        | CTTTAGATATTGGTTTCGGTCTTGACCG<br>GG                                 |                                                                                              |
| flank-IDI-F        | AAACGTAGCAAGTAAGGATCCGGATCT<br>AGGAGGTAATC                         | One more copy of <i>EcIDI</i><br>gene insertion into<br>pETDuet-ERG20-DrtB<br>plasmid        |
| flank-IDI-R        | AGGCGCGCCGAGCTCGAATTC                                              |                                                                                              |
| 28a-rbs-mvaA-F     | TAAGAAGGAGATATACCATGGAGGAGG<br>AAAACATCATGCAG                      | <i>mvaA</i> gene insertion into<br>pET28a(+)                                                 |
| 28a-rbs-mvaA-R     | GTGGTGGTGGTGGTCTCGAGTTATTGC<br>TGACGAATTTCTTG                      |                                                                                              |
| T1-mvaA-ter-F      | ATTCGTCAGCAATAAGAATTCAGGAGG<br>AAAACATCATGCAGAG                    | One more copy of <i>mvaA</i><br>gene with T7 terminator<br>insertion into pACYCDuet-<br>T1B1 |
| T1-mvaA-ter-R      | GACCTGCAGGCGCGCCGAGCTCCAGCA<br>AAAACCCCTCAAGACCC                   |                                                                                              |
| RK-ERG20-F         | TAAGAAGGAGATATACCATGCGTAAAC<br>GTAAACGTAAAGCGAGCGAGAAAGAAA<br>TCCG | RK-ERG20-RK, <i>EcIDI</i> -<br>NGCatcher and NGTag-<br>SnoopTag-β-Cav1<br>fragments assembly |
| RK-ERG20-R         | TTATTTACGTTTACGCTTGCTACGTTTGT<br>AAACCTTG                          |                                                                                              |
| RK tail-IDI-F      | CGTAAACGTAAATAAGGATCCGGATCT<br>AGGAGGTAATC                         |                                                                                              |
| linker-IDI-R       | CTGAACCACCACCACCTTTCAGTTGGGT<br>AAACGCGCTC                         |                                                                                              |
| linker-NGCatcher-F | GGTGGTGGTGGTTCAGGTG                                                |                                                                                              |
| β-Cav1-R           | AAGCTTGTCGACCTGCAG                                                 |                                                                                              |
| DrtB-F             | TAAGAAGGAGATATACATATGGTAAGG<br>G                                   |                                                                                              |
| DrtB-R             | TACCACCTTGGACAGCAACAG                                              |                                                                                              |
| DrtB tail-F        | CTGTTGCTGTCCAAGGTGGTA                                              |                                                                                              |
| Duet-R             | GGTTTCTTTACCAGACTCGAG                                              |                                                                                              |
| rev-atoB-B1-F      | GAGCTCGGCGCGCTGCAGGTC                                              | pACYCDuet-atoB-B1<br>vector linearization                                                    |
| rev-atoB-B1-R      | GTTCAGACGTTCAATAACCATCGCGATG<br>CCCTGAC                            |                                                                                              |

|             |                        |                                                                                                     |
|-------------|------------------------|-----------------------------------------------------------------------------------------------------|
| AtoB tail-F | GCGATGGTTATTGAACGTC    | AtoB_tail-SpyTag-SpyTag-SnoopTag-SnoopTag, mvaS-SpyCatcher and mvaA-SnoopCatcher fragments assembly |
| mvaS-head-R | GATTTTGTCAATACCGATGG   |                                                                                                     |
| mvaS-head-F | ACCATCGGTATTGACAAAATC  |                                                                                                     |
| mvaS-R      | CTCCGGACGGTGATATTCAC   |                                                                                                     |
| mvaS-tail-F | GTGAATATCACCGTCCGGAG   |                                                                                                     |
| mvaA-head-R | GAAGTTTTTGTCCAGGCTCTG  |                                                                                                     |
| mvaA-head-F | AGAGCCTGGACAAAAACTTC   |                                                                                                     |
| mvaA-R      | TTGCTGACGAATTTCTTGCAG  |                                                                                                     |
| mvaA-tail-F | ATCCTGCAAGAAATTCGTCAGC |                                                                                                     |
| ACYC-R      | ACCTGCAGGCGCGCCGAGC    |                                                                                                     |

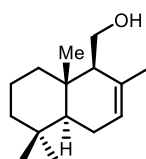

(-)-Drimenol  
11

**<sup>1</sup>H NMR (400 MHz, CDCl<sub>3</sub>):** δ 5.54 (m, 1H), 3.86 (dd, *J* = 11.3, 3.4 Hz, 1H), 3.74 (dd, *J* = 11.3, 4.9 Hz, 1H), 1.93 – 2.05 (m, 2H), 1.83 – 1.92 (m, 2H), 1.77 – 1.79 (m, 3H), 1.55 (m, 1H), 1.39 – 1.49 (m, 2H), 1.13 – 1.22 (m, 2H), 1.07 (td, *J* = 13.1, 3.9 Hz, 1H), 0.89 (s, 3H), 0.86 (s, 3H), 0.86 (s, 3H).

**<sup>13</sup>C NMR (151 MHz, CDCl<sub>3</sub>):** δ 133.0, 124.2, 61.0, 57.4, 50.0, 42.3, 40.0, 36.2, 33.5, 33.0, 23.7, 22.2, 22.1, 18.9, 15.0.

$[\alpha]_D^{23} = -43.30$  (*c* = 1.00, CHCl<sub>3</sub>).

**HRMS (ESI+):** calculated for C<sub>15</sub>H<sub>25</sub>O<sub>2</sub> [M+H-H<sub>2</sub>O]<sup>+</sup>: 205.1951, found 205.1950.

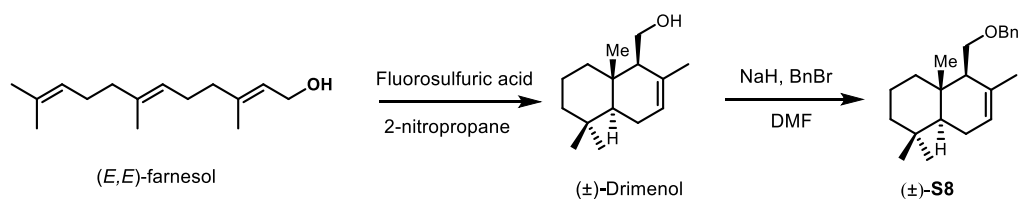

The racemic drimenol was synthesized according to the literature.<sup>3</sup>

Synthesis of racemic benzyl-substituted drimenol derivative (±)-**S8**:

A solution of (*E,E*)-farnesol (44.4 mg, 0.20 mmol, 1.0 equiv.) was treated with fluorosulfonic acid (400 mg, 4.0 mmol, 20 equiv.) in 2-nitropropane (2 mL) at -78 °C for 2 hours. The reaction mixture was neutralized with Et<sub>3</sub>N, washed with H<sub>2</sub>O (10 mL) and extracted with Et<sub>2</sub>O (10 mL × 3). The combined organic phase was washed with brine, dried over anhydrous Na<sub>2</sub>SO<sub>4</sub>, filtered, and concentrated in vacuo. The residue was purified by flash column chromatography (hexane/ethyl acetate = 30:1) to give (±)-Drimenol (26.6 mg, 60%



yield) as white solid.

A solution of ( $\pm$ )-Drimenol (22.2 mg, 0.10 mmol, 1.0 equiv.) in DMF (1 mL) was treated with NaH (60% dispersion in mineral oil, 6 mg, 0.15 mmol, 1.5 equiv.) and BnBr (25.7 mg, 0.15 mmol, 1.5 equiv.). The reaction mixture was stirred at 23 °C for 10 hours before it was quenched with H<sub>2</sub>O (10 mL) and extracted with EtOAc (10 mL  $\times$  3). The combined organic phase was washed with brine, dried over anhydrous Na<sub>2</sub>SO<sub>4</sub>, filtered, and concentrated in vacuo. The residue was purified by flash column chromatography (hexane/ethyl acetate = 70:1) to give ( $\pm$ )-**S8** (29.6 mg, 95% yield) as colorless oil.

**<sup>1</sup>H NMR (600 MHz, CDCl<sub>3</sub>):**  $\delta$  7.33 (d,  $J$  = 4.4 Hz, 4H), 7.29 – 7.23 (m, 1H), 5.41 – 5.51 (m, 1H), 4.46 (dd,  $J$  = 12.0, 2.8 Hz, 2H), 3.61 (dd,  $J$  = 9.7, 2.9 Hz, 1H), 3.42 (dd,  $J$  = 9.7, 6.2 Hz, 1H), 1.95 – 2.02 (m, 2H), 1.81 – 1.94 (m, 2H), 1.74 (s, 3H), 1.48 – 1.56 (m, 1H), 1.35 – 1.46 (m, 2H), 1.19 (dd,  $J$  = 12.3, 4.5 Hz, 1H), 1.15 (dd,  $J$  = 13.3, 3.7 Hz, 1H), 1.08 (td,  $J$  = 13.1, 3.7 Hz, 1H), 0.88 (s, 3H), 0.86 (s, 3H), 0.80 (s, 3H)..

**<sup>13</sup>C NMR (151 MHz, CDCl<sub>3</sub>):**  $\delta$  138.7, 134.1, 128.4, 127.8, 127.5, 122.9, 73.1, 69.3, 54.8, 50.1, 42.4, 39.7, 36.0, 33.5, 33.1, 23.8, 22.1, 22.1, 19.0, 14.7.

(-)-Drimenol was derivated with benzyl group to determine the *ee* value (>99% *ee*).

**HPLC** (OD-H, 0.46\*25 cm, 5 $\mu$ m, hexane / 2-propanol = 99.5/0.5, flow 1 mL/min, detection at 210 nm) retention time = 9.122 min (>99% *ee*).

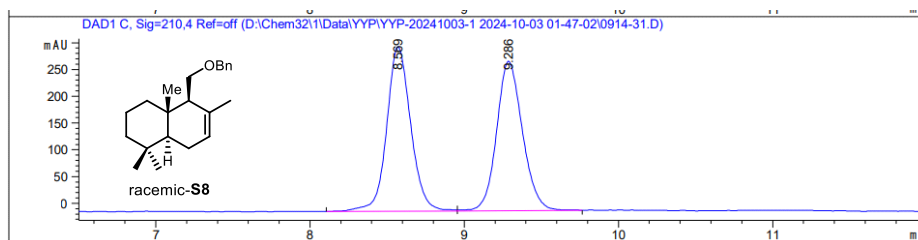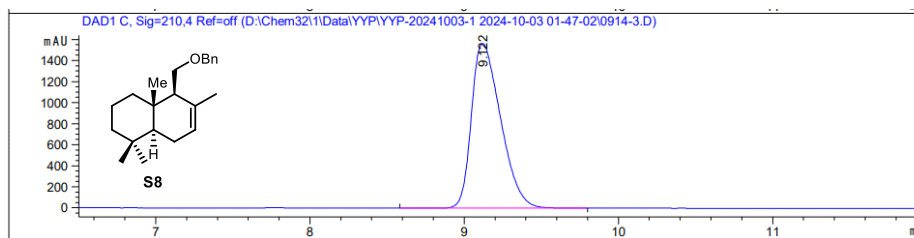



colony was inoculated in 20 mL of LB medium containing ampicillin (100 µg/mL). After shaking at 37 °C and 220 rpm overnight, the culture was added to 1 L of LB medium containing ampicillin (100 µg/mL). The cultures were incubated at 37 °C and 220 rpm until OD<sub>600</sub> reached 0.8–0.9. The culture was pre-cooled to 4 °C, and induced with IPTG (0.1 mM). After shaking at 25 °C and 180 rpm for 16h, the cells were harvested by centrifugation at 20 °C and 9,000g for 15 min. The pellets were stored at –80 °C until further processing. The purification of BmGDH was the same as P450<sub>Bm3</sub> (F87A).

**P450<sub>Bm3</sub> (F87A)** (1049 aa, 3150 bp)

MTIKEMPQPKTFGELKNLPLLNTDKPVQALMKIADELGEIFKFEAPGRVTRYLSSQRLIKEACDESRFDKNLSQALKFVRDFA  
GDGLATSWTHEKNWKAHNILLPSFSQQAMKGYHAMMVDIAVQLVQKWERLNADEHIEVPEDMTRLTLDTIGLCGFNYRFNSF  
YRDQPHPFITSMVRALDEAMNKLQRANPDDPAYDENKRQFQEDIKVMNDLVDKIIADRKASGEQSDDLTHMLNGKDPETGEP  
LDDENIRYQIITFLIAGHETTSGLLSFALYFLVKNPHVLQKAAEEAARVLVDPVPSYKQVKQLKYVGMVLNEALRLWPTAPAF  
SLYAKEDTVLGGEYPLEKGDDELMVLIPLQHRDKTIWGDDVEEFRPERFENPSAIPQHAFKPFNGQRACIGQQFALHEATLVL  
GMMLKHFD FEDHTNYELDIKETLTLKPEGFVVKAKSKKIPLGGIPSPSTEQSAKKVRKKAENAHNTPLLVLYGSNMGTAEFTA  
RDLADIAMSKGFAPQVATLDSHAGNLPREGAVLIVTASYNHPPDNAKQFVDWLDQASADEVKGVRYSVFGCGDKNWATTYQK  
VPAFIDETLAAKGAENIADRGEADASDDFEGTYEEWREHMWSDVAAYFNLDIENSEDNKSTLSLQFVDSAADMPLAKMHGAFS  
TNVVASKELOQPGSARSTRHLEIELPKEASYQEGDHLGVI PRNYEGIVNRV TARFGLDASQQIRLEAEKLAHLPLAKTVSV  
EELLQYVELQDPVTRTQLRAMAAKTVCPPHKVELEALLEKQAYKEQVLAKRLTMLELLEKY PACEMKFSEFIALLP SIRPRYY  
SISSSPRVDEKQASITVSVVSGEAWSGYGEYKGIASNYLAELQEGDTITCFISTPQSEFTLPKDPETPLIMVGP GTGVAPFRG  
FVQARKQLKEQGQSLGEAHL YFGCRSPHEDYLYQEELNAQSEGIITLHTAFSRMPNQPKTYVQHVMEQDGKKLIELLDQGAH  
FYICGDGSMAPAVEATLMKSYADVHVQVSEADARLWLQQLLEEKGRYAKDVWAG

atgacatcaaagaaatgccgcagccgaagacaccttcggcgagctgaaaaacctgccgctgctgaacaccgacaagccggtgca  
agcgtgatgaaaatcgcgatgaactggcgagatcttcaagtttgaggcgccgggcccgtgttacccgttacctgagcagcc  
agcgtctgatcaaagagcgtgacgacgaaagccgtttcgataagaacctgagccaagcgtgaaattcgtgctgactttgcg  
ggtgatggtctggcgaccagctggaccacgaaaagaactggaagaaagcgcacacaacatcctgctgccaagctttagccagca  
agcgtgaagggttatcacgcatgatggtggacattgcggtgcagctggttcaaaaatgggagcgtctgaacgaggatgaac  
acatcgaggttccggaagacatgaccctctgaccctggataccattggcctgtgcggttcaactaccgtttcaacagcttt  
tatcgtgaccagccgacccgtttatcaccagcatggttcgtgctggtgatgaagcgtgaacaagctgcaacgtgcaaccc  
ggacgatccggcgtacgacgaaaacaagcgtcagttccaagaggatattaagtgatgaacgacctggttgataagatcattg

cggaccgtaaagcgagcggcgagcagagcgacgatctgctgaccacatgctgaacggtaaagatccggagaccggcgaaccg  
ctggacgatgaaaacatccgttaccaaatacattacctttctgattgcggtcatgagaccaccagcggcctgctgagcttcgc  
gctgtatcttctggtgaagaaccgcacgttctgcaaaaggcggcgaggaagcggcgctgtgctggtcgaccgggtgccga  
gctacaagcaggttaacaactgaagtatgtgggtatggttctgaacgaagcgtgctgctgtggccgaccgcgcggcgttc  
agcctgtacgcgaaagaggacaccgtgctgggtggcgagtatccgctggaaaagggtgacgagctgatggttctgatcccgca  
gctgcaccgtgataagaccatttggggcgacgatgtggaggagtccgctccggagcgttttgaaaaccgagcgggatcccg  
agcacgcgttcaaaccgtttggtaacggccaacgtgctgcatgggtcagcaattcgctgctgacgaagcgaccctggttctg  
ggcatgatgctgaagcacttcgactttgaggatcacaccaactacgaactggacatcaaggagaccctgaccctgaaaccgga  
gggttttgtggttaaggcgaagcaagaaaatcccgctgggtggcattccgagcccagcaccgaacagagcgcgaagaaa  
tgcgtaagaaagcggagaaacgcgcacaacaccccgctgctggttctgtacggcagcaacatgggcaccgcggagggcaccgcg  
cgtgacctggcggacatcgcgatgagcaaagggttttgcgccgaagtggcgaccctggacagccatgcccgttaacctgccgcg  
tgagggtgcccgtgctgattgttacgcgagctataacggtcaccgcgggataacgcgaagcagtttgttactggctggatc  
aagcgagcgcggacgaagtgaaaggcgttcgttacagcgtgttcggttgcggcgataagaactgggcgaccacctatcagaaa  
gttccggcgtttattgatgagaccctggcggcgaaggggtgcggaaaacattgcccaccgtggcgaggcggatgagcgcgacga  
tttgaaggcacctacgaggaatggcgtgagcacatgtggagcgtggtggcggtattttaacctggacatcgagaacagcg  
aagataacaaaagcaccctgagcctgcaattcgttgacagcggcggtatgcccgtggcgaagatgcacggtgctgttagc  
accaacgtggttgcgagcaaagagctgcaacaaccggcagcgcgctagcaccctcacctggaaatcgagctgccgaaaga  
agcgcgctaccaagagggtgaccacctggcgtgatcccgcgtaactatgaaggattgtgaaccgtgttaccgcgcttttg  
gtctggatgagcagcagcaaatcgtctggaggcggaggaagagaagctggcgacacctgccgtggcgaaaaccgtgagcgtt  
gaagagctgctgcaatacgtggagctgcaagaccgggttaccctgacccaactgctgctgatggcggcgaagaccgtgtgcc  
gccgcacaaaagttgaactggaggcgtgctggaaaaacaggcgtacaaggagcaagttctggcgaagcgtctgaccatgctgg  
agctgctggaaaagtatccggcgtgcaaatgaaattcagcaggtttatcgcgctgctgccgagcattcgtccgcgttactat  
agcatcagcagcagcccgcgtgtggacgaaaagcagggcagcattaccgttagcgtggttagcgggtgaagcgtggagcgggta  
cggcgagtataaaggcatcgcgagcaactatctggcgagctgcaagaggggtgacaccatcacctgcttcattagcaccctgc  
aaagcgaatttaccctgccgaaagatccggagaccccgtgattatggttgggtccgggcaccgggtgttgcgccgttccgtggc  
tttgtgcaggcgcgtaaaacaactgaaggaacaggggtcaaagcctgggcgagggcgacacctgacttccggttgcgtagcccgca  
cgaggactacctgtatcaggaagagctggaaaacgcgcaaagcagggcatcattaccctgcacaccgcgttttagccgtatgc  
cgaaccagccgaagacctatgtgcagcacgttatggaacaagacggtaagaaactgatcagcgtgctggatcagggcgcgcac

ttctacatttgcggtgatggttagccagatggcgccggcggtggaagcgaccctgatgaaaagctatgcggaagctgcaccaagt  
tagcgagggcgatgcgcgctctgtggctgcaacaactggaagagaaaggtcgttacgcaagatgtttggcgggctaa

### **BmGDH (261 aa, 789 bp)**

MYTDLKDKVVVITGGSTGLGRAMAVRFGQEEAKVVINYNNNEEALDAKKEVEEAGGQAI IVQGDVTKEEDVVNLVQTATKEF  
GTLDVMINNAGVENPVPSHELSDLNWNKVIDTNLTGAFLGSREAIKYFVENDIKGNVINMSSVHEMI PWPLFVHYAASKGGMK  
LMTETLALLEYAPKGI RVNNIGPGAMNTP INA EK FADPEQRADVESMI PMGY IGKPEEVAAVA AFLASSQASYVTGITL FADGG  
MTKYPSFQAGRG

atgtatacagattttaaagataaagtagttgtaattacaggtggatcaacaggtttaggacgcgcaatggctgttcgtttcg  
tcaagaagaagcaaaagttgttattaactattacaacaatgaagaagaagctttagatgcaaaaaagaagtagaagaagcag  
gcggaacaagcaatcatcgttcaaggcgacgtaacaaaagaagaagacggtgtaaatcttgttcagacagctactaagaattc  
ggtagacattagacggttatgattaacaacgctgggtgtgaaaatccagttccttctcatgagttatctctagataactggaacaa  
agttattgatacaaaacttaacaggtgcattcttaggaagccgtgaagcaattaaatatttcggtgaaaacgatattaaaggaa  
atggtatcaacatgtctagcgttcacgaaatgattccttggccattatttgttcactatgcagcaagtaaaggcgcatgaaa  
ctaatgacggaaacattggctcttgaatatgccc aaaaggtatccgcgtaataacattggaccaggtgcatgaacacacc  
aattaacgcagagaaaatttgagatccagaacaacgtgcagacgtagaaagcatgattccaatgggctacatcggtaaaccag  
aagaagtagcagcagttgcagcattcttagcatcatcacaagcaagctatgtaacaggtattacattatttgcgatgggtgt  
atgacgaaatacccttctttccaagcaggaagaggctaa

### **4.2 *In vitro* enzymatic assay of P450<sub>BM3</sub> (F87A)**

The 100  $\mu$ L reaction mixture contained 100 mM Kpi buffer, pH 7.4, 100 mM glucose (1 M stock solution in 100 mM Kpi buffer, pH 7.4), 1 mM NADP<sup>+</sup> (100 mM stock solution in 100 mM Kpi buffer, pH 7.4), 10  $\mu$ M P450<sub>BM3</sub> (F87A), 45  $\mu$ M BmGDH in 2 mL tube. And the reaction was started by addition of 2  $\mu$ L drimenol stock solution (50 mM, 100 mM in DMF, respectively). Then the tubes were shaken at 25 °C, 200 rpm for 16 h. The reaction was quenched by adding 200  $\mu$ L ethyl acetate and extracted twice by vortexing. The mixture was centrifuged at 21,000g for 1 min. The collected organic phase was transferred into a new tube and concentrated with N<sub>2</sub> stream. The residual sample was dissolved with 100  $\mu$ L ethyl acetate for the following GC-MS analysis. To verify that **11** was produced through selective epoxidation of **10**, 2  $\mu$ L **10** stock solution (10 mM) was added to start the reaction instead of drimenol. The reaction condition and extraction method were the same as mentioned above. The sample was analyzed by GC-MS (Figure S3).

### 4.3 Product identification

*In vitro* enzymatic assay indicated that purified P450<sub>BM3</sub> (F87A) enzyme catalyzed the oxidation from drimenol to **12** with higher drimenol concentration and to **13** with lower drimenol concentration. To identify the structure of **12**, 100 mg drimenol dissolved in 4.5 mL DMF was added into the reaction mixture (100 mM Kpi buffer, pH 7.4, 100 mM glucose, 1 mM NADP<sup>+</sup>, 10 μM P450<sub>BM3</sub> (F87A), 45 μM BmGDH). The total reaction volume was 225 mL and the final concentration of drimenol was 2 mM. The reaction was incubated at 25 °C, 200 rpm. During the reaction process, 100 μL reaction mixture was sampled and monitored by GC-MS analysis. After 32 h, the reaction mixture was extracted with equal volume ethyl acetate in three times. The organic phase was dried over Na<sub>2</sub>SO<sub>4</sub> and removed at the rotary evaporator. After purification by column chromatography on silica gel, 65.4 mg **12** was obtained. **12** was confirmed by <sup>1</sup>H, <sup>13</sup>C, and X-ray crystallography (Table S2). To identify the structure of **13**, 20 mg drimenol dissolved in 4.5 mL DMF was added into the reaction mixture (100 mM Kpi buffer, pH 7.4, 200 mM glucose, 2 mM NADP<sup>+</sup>, 20 μM P450<sub>BM3</sub> (F87A), 90 μM BmGDH). The total reaction volume was 225 mL and the final concentration of drimenol was 0.4 mM. The reaction was incubated for 22 h before extraction and the post-treatment was similar to mentioned above. Compound **13** was confirmed by <sup>1</sup>H, <sup>13</sup>C according to the previous report.<sup>5</sup>

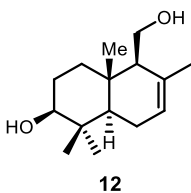

**<sup>1</sup>H NMR (400 MHz, CDCl<sub>3</sub>):** δ 5.32 – 5.65 (m, 1H), 3.84 (dd, *J* = 11.3, 3.5 Hz, 1H), 3.73 (dd, *J* = 11.3, 5.1 Hz, 1H), 3.17 – 3.29 (m, 1H), 1.93 – 2.10 (m, 3H), 1.84 (bs, 1H), 1.74 – 1.80 (m, 3H), 1.54 – 1.69 (m, 2H), 1.27 – 1.29 (m, 1H), 1.23 – 1.26 (m, 1H), 1.19 (dd, *J* = 11.0, 5.7 Hz, 1H), 0.98 (s, 3H), 0.86 (s, 3H), 0.85 (s, 3H).

**<sup>13</sup>C NMR (101 MHz, CDCl<sub>3</sub>):** δ 132.9, 124.0, 79.1, 60.9, 57.2, 49.5, 38.8, 38.0, 36.0, 28.2, 27.4, 23.4, 21.9, 15.5, 15.0.

$[\alpha]_D^{22} = -20.00$  (*c* = 0.50, CHCl<sub>3</sub>).

Melting Point: 135-136 °C.

**HRMS (ESI+):** calculated for C<sub>15</sub>H<sub>26</sub>O<sub>2</sub>Na [M+Na]<sup>+</sup>: 261.1825, found 261.1824.

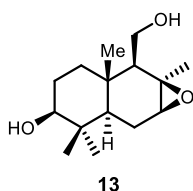

**<sup>1</sup>H NMR (400 MHz, CDCl<sub>3</sub>)**: δ 3.99 (dd, *J* = 11.4, 4.0 Hz, 1H), 3.95 (dd, *J* = 11.3, 4.0 Hz, 1H), 3.15 – 3.24 (m, 1H), 3.04 (d, *J* = 6.4 Hz, 1H), 1.91 – 2.06 (m, 2H), 1.76 – 1.88 (m, 2H), 1.63 – 1.55 (m, 2H), 1.43 (t, *J* = 4.0 Hz, 1H), 1.39 (s, 3H), 1.04 – 1.13 (m, 1H), 1.00 (s, 3H), 0.97 (dd, *J* = 13.3, 4.8 Hz, 1H), 0.92 (s, 3H), 0.80 (s, 3H).

**<sup>13</sup>C NMR (101 MHz, CDCl<sub>3</sub>)**: δ 78.9, 60.7, 60.6, 59.4, 55.1, 49.2, 39.0, 38.7, 36.1, 28.2, 27.0, 22.9, 21.7, 16.0, 15.3.

**HRMS (ESI+)**: calculated for C<sub>15</sub>H<sub>26</sub>O<sub>3</sub>Na [M+Na]<sup>+</sup>: 277.1780, found 277.1773.

**Table S2.** Crystal data and structure refinement for 3-(OH)-drimenol (**12**).

|                                        |                                                               |
|----------------------------------------|---------------------------------------------------------------|
| CCDC Number                            | 2307775                                                       |
| Empirical formula                      | C <sub>15</sub> H <sub>26</sub> O <sub>2</sub>                |
| Formula weight                         | 238.36                                                        |
| Temperature/K                          | 100.0(2)                                                      |
| Crystal system                         | orthorhombic                                                  |
| Space group                            | P2 <sub>1</sub> 2 <sub>1</sub> 2 <sub>1</sub>                 |
| <i>a</i> /Å                            | 9.9809(8)                                                     |
| <i>b</i> /Å                            | 12.4367(11)                                                   |
| <i>c</i> /Å                            | 21.6963(18)                                                   |
| <i>α</i> /°                            | 90                                                            |
| <i>β</i> /°                            | 90                                                            |
| <i>γ</i> /°                            | 90                                                            |
| Volume/Å <sup>3</sup>                  | 2693.1(4)                                                     |
| <i>Z</i>                               | 8                                                             |
| $\rho_{\text{calc}}$ /cm <sup>3</sup>  | 1.176                                                         |
| $\mu$ /mm <sup>-1</sup>                | 0.374                                                         |
| F(000)                                 | 1056.0                                                        |
| Crystal size/mm <sup>3</sup>           | 0.21 × 0.19 × 0.16                                            |
| Radiation                              | GaK $\alpha$ ( $\lambda$ = 1.34138)                           |
| 2 $\theta$ range for data collection/° | 7.09 to 147.078                                               |
| Index ranges                           | -14 ≤ <i>h</i> ≤ 13, -17 ≤ <i>k</i> ≤ 17, -31 ≤ <i>l</i> ≤ 31 |
| Reflections collected                  | 126855                                                        |

|                                             |                                       |
|---------------------------------------------|---------------------------------------|
| Independent reflections                     | 8233 [Rint = 0.0637, Rsigma = 0.0234] |
| Data/restraints/parameters                  | 8233/0/319                            |
| Goodness-of-fit on F <sup>2</sup>           | 1.060                                 |
| Final R indexes [ $I \geq 2\sigma(I)$ ]     | R1 = 0.0282, wR2 = 0.0760             |
| Final R indexes [all data]                  | R1 = 0.0289, wR2 = 0.0767             |
| Largest diff. peak/hole / e Å <sup>-3</sup> | 0.29/-0.16                            |
| Flack parameter                             | -0.03(4)                              |

#### 4.4 Docking drimenol into P450<sub>BM3</sub> (F87A)

The haem domain of P450<sub>BM3</sub> (F87A) was used as receptor structure for docking study, which was performed in Autodock Vina. Mutation of F87A was added to the wild-type P450<sub>BM3</sub> crystal structure (PDB code, 6K24) via Pymol. Simultaneously, the ligand, N-Abietoyl-L-Tryptophan, and all water molecules were removed from the structure prior to the docking calculation, and both receptor and substrate **9**, were treated as rigid entities. In Vina, the docking site was defined as a 22.5 Å × 22.5 Å × 22.5 Å box centered on the 87A, and poses were ranked using the Autodock Vina scoring function. The best pose of nine poses was selected according to the closest distance between C-3 of **11** and haem iron.

#### 4.5 Construction of the focus library of P450<sub>BM3</sub>

The P450<sub>BM3</sub> L75/F87 library was created by Quik-change PCR for site mutation. The annealing temperature was 72 °C. The sequences of primers are shown in Table S3. The L75 mutagenetic primers were firstly applied to obtained nine L75 mutants with P450<sub>BM3</sub> (F87A) as template. Subsequently, those mutants were utilized as templates for generating remaining 72 mutants with F87 mutagenetic primers.

**Table S3.** The primers used for L75/F87 mutant library.

| Primer | Sequence (5'-3')                   |
|--------|------------------------------------|
| L75A-F | CGATAAGAACCTGAGCCAAGCGgcgAAATTCGTG |
| L75A-R | GCAAAGTCACGCACGAATTTcgCGCTTGGCTC   |
| L75F-F | AAGAACCTGAGCCAAGCGtttAAATTCGTG     |
| L75F-R | aaaCGCTTGGCTCAGGTTCTTATCGAAACGG    |
| L75I-F | AAGAACCTGAGCCAAGCGattAAATTCGTG     |
| L75I-R | aatCGCTTGGCTCAGGTTCTTATCGAAACGG    |
| L75M-F | AAGAACCTGAGCCAAGCGatgAAATTCGTG     |
| L75M-R | catCGCTTGGCTCAGGTTCTTATCGAAACGG    |



|        |                                  |
|--------|----------------------------------|
| L75V-F | AAGAACCTGAGCCAAGCGgtgAAATTCGTG   |
| L75V-R | cacCGCTTGGCTCAGGTTCTTATCGAAACGG  |
| L75T-F | AAGAACCTGAGCCAAGCGaccAAATTCGTG   |
| L75T-R | ggtCGCTTGGCTCAGGTTCTTATCGAAACGG  |
| L75S-F | AAGAACCTGAGCCAAGCGgagcAAATTCGTG  |
| L75S-R | gctCGCTTGGCTCAGGTTCTTATCGAAACGG  |
| L75G-F | AAGAACCTGAGCCAAGCGggcAAATTCGTG   |
| L75G-R | gccCGCTTGGCTCAGGTTCTTATCGAAACGG  |
| A87F-F | CTTTGCGGGTGATGGTCTGtttACCAGCTGGA |
| A87F-R | aaaCAGACCATCACCCGCAAAGTCACGCACG  |
| F87L-F | CTTTGCGGGTGATGGTCTGctgACCAGCTGGA |
| F87L-R | cagCAGACCATCACCCGCAAAGTCACGCACG  |
| F87I-F | CTTTGCGGGTGATGGTCTGattACCAGCTGGA |
| F87I-R | aatCAGACCATCACCCGCAAAGTCACGCACG  |
| F87M-F | CTTTGCGGGTGATGGTCTGatgACCAGCTGGA |
| F87M-R | catCAGACCATCACCCGCAAAGTCACGCACG  |
| F87V-F | CTTTGCGGGTGATGGTCTGgtgACCAGCTGGA |
| F87V-R | cacCAGACCATCACCCGCAAAGTCACGCACG  |
| F87T-F | CTTTGCGGGTGATGGTCTGaccACCAGCTGGA |
| F87T-R | ggtCAGACCATCACCCGCAAAGTCACGCACG  |
| F87S-F | CTTTGCGGGTGATGGTCTGagcACCAGCTGGA |
| F87S-R | gctCAGACCATCACCCGCAAAGTCACGCACG  |
| F87G-F | CTTTGCGGGTGATGGTCTGggcACCAGCTGGA |
| F87G-R | gccCAGACCATCACCCGCAAAGTCACGCACG  |

---

#### 4.6 Screening of the P450<sub>BM3</sub> library

Each pET28a-P450<sub>BM3</sub> mutant was co-transformed with pET22b-BmGDH into *E. coli* BL21(DE3). Three colonies or glycerol stocks were inoculated into a 96 deep wells plate, which was filled with 500  $\mu$ L LB medium contained 50  $\mu$ g/mL kanamycin and 100  $\mu$ g/mL ampicillin. The cultures were grown at 37 °C, 500 rpm for 16 h. The expression and cell harvest methods were according to the previous report.<sup>4</sup> Briefly, 100  $\mu$ L of seed culture was inoculated into 800  $\mu$ L modified P450 expression medium (containing appropriate antibiotics and 0.1 mM IPTG) in another 96 deep wells plate and incubated at 25 °C, 200 rpm for 8 h. The cell pellets were harvested and washed with 600  $\mu$ L 100 mM Kpi buffer, pH 7.4. After

centrifugation at 3,000g for 5 min, the cell pellets were frozen in liquid nitrogen for 15 min and thawed at room temperature. The 100  $\mu$ L reaction mixture containing 100 mM Kpi buffer, pH 7.4, 100 mM glucose, 1 mM NADP<sup>+</sup>, and 1 mM drimenol (50 mM stock solution in DMF) was added in each well. Then the deep wells plate was shaken at 25 °C, 200 rpm for 16 h. The reaction was stopped by adding 200  $\mu$ L ethyl acetate. Then the extraction was completed by mixing with pipette. The mixture was centrifuged at 3,000g for 10 min. The 100  $\mu$ L organic phase was transferred into the interior tube of GC vial followed by GC-MS analysis.

P450<sub>BM3</sub> (L75A/F87I) and P450<sub>BM3</sub> (L75G/F87I) were re-cultured in 96 deep wells plate for whole cell and cell lysate catalysis in triplicate. The concentration of cells was around 14 OD/mL measured by UV spectrophotometer. The whole cell catalysis experiments were the same as above. For the cell lysate catalysis, the cells were removed from wells and resuspended with 87  $\mu$ L 100 mM Kpi buffer, pH 7.4 in new tubes, followed by ultrasonication (30% power, 1 s on, 3 s off). The lysate was centrifuged at 4 °C and 21,000g for 2 min. The brownish-red supernatant was transferred into a new 2 mL tube. The reaction was started by adding 100 mM glucose, 1 mM NADP<sup>+</sup>, and 1 mM drimenol (50 mM stock solution in DMF) in the lysate solution and incubated at 25 °C, 200 rpm for 16 h. The reaction was stopped by adding 200  $\mu$ L ethyl acetate and extracted by vortexing. The mixture was centrifuged at 21,000g for 1 min. The organic phase was used for GC-MS analysis.

#### **4.7 Optimization of the reaction conditions for drimenol oxidation**

To screen the appropriate co-solvent and its concentration, 3 mM drimenol was added with the concentration of DMF, DMSO, MeOH ranging from 2% to 6%. Besides, the reaction mixture contained 28 OD/mL cell lysate (in 100 mM Kpi buffer, pH 7.4), 100 mM glucose and 1 mM NADP<sup>+</sup>. Then, the reaction was incubated at 25 °C, 200 rpm for 16 h. The post-treatment was same as library screening procedure (Figure S4B, S4C).

#### **4.8 Gram-scale oxidation of drimenol with P450<sub>BM3</sub> (L75A/F87I)**

*E. coli* BL21(DE3) harboring pET28a-P450<sub>BM3</sub> (L75A/F87I) and pET22b-BmGDH was cultured in 13 L modified P450 expression medium at 37 °C, 220 rpm until OD<sub>600</sub> reached 0.8–0.9. The culture was pre-cooled on ice, and induced with 0.1 mM IPTG. After expression at 25 °C, 180 rpm for 16 h, the concentration of cells is about 8300 OD/L measured by UV spectrophotometer. The cells were harvested by centrifugation at 20 °C and 9,000g for 15 min. The cell pellets were collected in 50 mL tube per 0.76 L initial medium and

stored at  $-80\text{ }^{\circ}\text{C}$  until further processing. For cell lysis, the cell pellet was thawed and resuspended by 200 mL Kpi buffer (100 mM, pH 7.4) per 0.76 L of initial culture. Cells were broken by high pressure homogenizer. The collected lysate was centrifuged at  $4\text{ }^{\circ}\text{C}$  and 36,000g for 30 min. Then the obtained brownish-red supernatant was added into the 2.8 L flask which contained freshly pre-dissolved 335 mg  $\text{NADP}^+$  and 7.6 g glucose in 200 mL Kpi buffer (100 mM, pH 7.4). The reaction was started by addition of 140 mg drimenol dissolved in 21 mL DMF. Then seventeen flasks contained 2.38 g drimenol in total were shaken at  $25\text{ }^{\circ}\text{C}$ , 200 rpm for 16 h. The reaction mixtures were extracted with 1/2 volume ethyl acetate in three times. The resulting sample was dried over  $\text{Na}_2\text{SO}_4$  and concentrated by the rotary evaporator under reduced pressure. After purification by column chromatography on silica gel, 1.55 g of compound **12** was obtained.

## 5. Synthetic procedures

### 5.1 Optimization for the Ni-catalyzed reductive coupling reaction

**Table S4.** Optimization for the Ni-catalyzed reductive coupling reaction

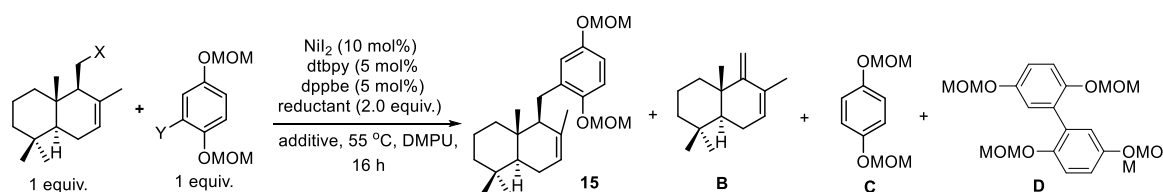

| Entries | X  | Y  | reductant | additive                                                          | yield of <b>15</b> <sup>b</sup> | yield of <b>B</b> <sup>b</sup> | yield of <b>C</b> <sup>c</sup> | yield of <b>D</b> <sup>c</sup> |
|---------|----|----|-----------|-------------------------------------------------------------------|---------------------------------|--------------------------------|--------------------------------|--------------------------------|
| 1       | I  | I  | Mn        | pyridine (12 mol%)                                                | 6%                              | 71%                            | 32%                            | 12%                            |
| 2       | Br | I  | Mn        | pyridine (12 mol%)                                                | 40%                             | 38%                            | 16%                            | 18%                            |
| 3       | I  | Br | Mn        | pyridine (12 mol%)                                                | 3%                              | 75%                            | 30%                            | 10%                            |
| 4       | Br | Br | Mn        | pyridine (12 mol%)                                                | 49%                             | 35%                            | 5%                             | 13%                            |
| 5       | Br | Br | Mn        | pyridine (12 mol%)<br>+ $\text{Co}^{\text{II}}\text{Pc}$ (5 mol%) | 57%                             | 25%                            | 5%                             | 8%                             |
| 6       | Br | I  | Mn        | pyridine (12 mol%)<br>+ $\text{Co}^{\text{II}}\text{Pc}$ (5 mol%) | 62%                             | 20%                            | 8%                             | 7%                             |
| 7       | Br | I  | Zn        | pyridine (12 mol%)<br>+ $\text{Co}^{\text{II}}\text{Pc}$ (5 mol%) | 26%                             | 46%                            | 15%                            | 12%                            |
| 8       | Br | I  | TDAE      | pyridine (12 mol%)<br>+ $\text{Co}^{\text{II}}\text{Pc}$ (5 mol%) | 35%                             | 40%                            | 12%                            | -                              |

<sup>a</sup> dtbpy = 4,4-Di-tert-butyl bipyridine, dppbe = 1,2-bis(diphenylphosphino)benzene, DMPU = 1,3-Dimethyl-3,4,5,6-tetrahydro-2(1H)-pyrimidinone, TDAE = Tetrakis(dimethylamino)ethylene,  $\text{Co}^{\text{II}}\text{Pc}$  = Cobalt phthalocyanin. The yields of isolated products were given. <sup>b</sup> Yield of **15** and yield of **B** were calculated based on the drimane moiety. <sup>c</sup> Yield of **C** and **D** were calculated based on the aryl halide moiety.

#### General Procedure for the Ni-catalyzed reductive coupling reaction:

A solution of drimane halide (0.10 mmol, 1.0 equiv.) and aryl halide (0.10 mmol, 1.0 equiv.) in DMPU (0.3

mL) was treated with NiI<sub>2</sub> (3.1 mg, 0.01 mmol, 10 mol%), 1,2-bis(diphenylphosphino)benzene (2.2 mg, 0.005 mmol, 5 mol%), 4,4'-di-*tert*-butyl-2,2'-dipyridyl (if needed, 1.3 mg, 0.005 mmol, 5 mol%), cobalt phthalocyanin (if needed, 2.9 mg, 0.005 mmol, 5 mol%), reductant (0.20 mmol, 2.0 equiv.), and pyridine (if need, 1  $\mu$ L, 0.012 mmol, 12 mol%). The reaction mixture was heated to 55 °C and stirred at the same temperature for 16 hours. The reaction was quenched with saturated aq. Na<sub>2</sub>S<sub>2</sub>O<sub>3</sub> solution (5 mL), and extracted with EtOAc (10 mL  $\times$  3). The combined organic phase was washed with brine, dried over anhydrous Na<sub>2</sub>SO<sub>4</sub>, filtered, and concentrated in vacuo. The residue was purified by flash column chromatography to yield elimination product **B** (hexane), desired product **13** (hexane/ethyl acetate = 20:1), reduced aryl compound **C** (hexane/ethyl acetate = 20:1) and homocoupling product **D** (hexane/ethyl acetate = 10:1).

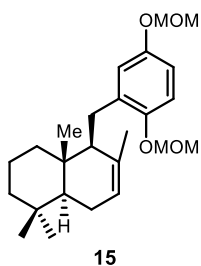

**<sup>1</sup>H NMR (400 MHz, CDCl<sub>3</sub>):**  $\delta$  6.92 – 7.01 (m, 2H), 6.80 (dd,  $J$  = 8.9, 3.0 Hz, 1H), 5.38 (m, 1H), 5.13 (s, 2H), 5.11 (s, 2H), 3.48 (s, 3H), 3.47 (s, 3H), 2.73 (dd,  $J$  = 15.4, 9.3 Hz, 1H), 2.59 (dd,  $J$  = 15.3, 2.6 Hz, 1H), 2.31 – 2.41 (m, 1H), 1.83 – 2.04 (m, 3H), 1.49 – 1.56 (m, 1H), 1.46 (s, 3H), 1.39 – 1.46 (m, 2H), 1.29 (dd,  $J$  = 11.9, 4.9 Hz, 1H), 1.16 – 1.25 (m, 1H), 1.05 – 1.15 (m, 1H), 0.91 (s, 3H), 0.90 (s, 3H), 0.88 (s, 3H).

**<sup>13</sup>C NMR (151 MHz, CDCl<sub>3</sub>):**  $\delta$  152.0, 150.3, 135.9, 134.6, 122.3, 118.4, 115.4, 113.7, 95.4, 95.3, 56.1, 56.0, 54.5, 50.5, 42.4, 39.7, 37.0, 33.4, 33.2, 26.5, 23.9, 22.5, 22.1, 19.1, 14.1.

$[\alpha]_D^{23}$  = -16.09 ( $c$  = 1.10, CHCl<sub>3</sub>).

**HRMS (ESI+):** calculated for C<sub>25</sub>H<sub>39</sub>O<sub>4</sub> [M+H]<sup>+</sup>: 403.2843, found 403.2840.

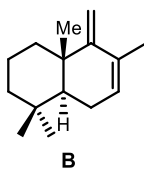

**<sup>1</sup>H NMR (600 MHz, CDCl<sub>3</sub>):**  $\delta$  5.63 – 5.69 (m, 1H), 4.83 (s, 1H), 4.79 (s, 1H), 2.11 – 2.18 (m, 1H), 1.98 – 2.06 (m, 1H), 1.84 – 1.90 (m, 1H), 1.78 – 1.81 (m, 3H), 1.63 (dt,  $J$  = 13.7, 3.2 Hz, 1H), 1.59 – 1.61 (m, 1H),

1.52 – 1.57 (m, 1H), 1.39 – 1.42 (m, 1H), 1.29 (dd,  $J = 11.8, 4.6$  Hz, 1H), 1.14 – 1.21 (m, 1H), 0.97 (s, 3H), 0.93 (s, 3H), 0.86 (s, 3H).

$^{13}\text{C}$  NMR (151 MHz,  $\text{CDCl}_3$ ):  $\delta$  158.3, 131.3, 126.7, 103.9, 48.8, 42.3, 37.9, 37.8, 33.5, 33.1, 24.4, 22.3, 21.2, 20.7, 19.2.

$[\alpha]_D^{24} = -9.40$  ( $c = 1.00$ ,  $\text{CHCl}_3$ ).

The NMR data was consistent with literature report.<sup>6</sup>

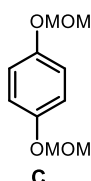

$^1\text{H}$  NMR (600 MHz,  $\text{CDCl}_3$ ):  $\delta$  6.97 (s, 4H), 5.12 (s, 4H), 3.48 (s, 6H).

$^{13}\text{C}$  NMR (151 MHz,  $\text{CDCl}_3$ ):  $\delta$  152.4, 117.6, 95.3, 56.0.

HRMS (ESI+): calculated for  $\text{C}_{10}\text{H}_{15}\text{O}_4$   $[\text{M}+\text{H}]^+$ : 199.0965, found 199.0966.

The NMR data was consistent with literature report.<sup>7</sup>

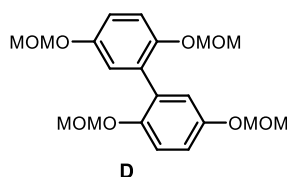

$^1\text{H}$  NMR (600 MHz,  $\text{CDCl}_3$ ):  $\delta$  7.13 (d,  $J = 8.6$  Hz, 1H), 6.95 – 7.00 (m, 2H), 5.13 (s, 2H), 4.99 (s, 2H), 3.48 (s, 3H), 3.33 (s, 3H).

$^{13}\text{C}$  NMR (151 MHz,  $\text{CDCl}_3$ ):  $\delta$  152.2, 150.0, 130.2, 119.8, 117.4, 116.6, 96.2, 95.3, 56.0, 56.0.

HRMS (ESI+): calculated for  $\text{C}_{20}\text{H}_{27}\text{O}_8$   $[\text{M}+\text{H}]^+$ : 395.1700, found 395.1705.

## 5.2 Synthesis of drimane halides and aryl halides

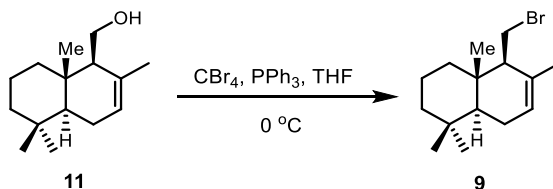

A solution of **11** (222 mg, 1.0 mmol, 1.0 equiv.) and carbon tetrabromide (830 mg, 2.5 mmol, 2.5 equiv.) in dry THF (4 mL) was treated with  $\text{PPh}_3$  (655 mg, 2.5 mmol, 2.5 equiv.) in THF (4 mL) dropwise at 0 °C. The reaction mixture was stirred at 0 °C for 2 hours then quenched with MeOH (5 mL). The solution was

concentrated in vacuo. The crude product was purified by flash column chromatography (hexane) to yield **9** (228 mg, 80% yield) as a colorless oil.

**<sup>1</sup>H NMR (400 MHz, CDCl<sub>3</sub>):** δ 5.48 (m, 1H), 3.65 (dd, *J* = 10.8, 2.2 Hz, 1H), 3.28 (dd, *J* = 10.8, 6.7 Hz, 1H), 2.34 – 2.40 (m, 1H), 1.90 – 2.04 (m, 2H), 1.86 (s, 1H), 1.78 – 1.84 (m, 1H), 1.52 – 1.55 (m, 1H), 1.47 – 1.52 (m, 1H), 1.15 – 1.24 (m, 2H), 1.12 (dd, *J* = 13.1, 4.4 Hz, 1H), 0.88 (s, 3H), 0.86 (s, 3H), 0.81 (s, 3H).  
**<sup>13</sup>C NMR (101 MHz, CDCl<sub>3</sub>):** δ 132.7, 124.1, 57.8, 50.1, 42.1, 39.4, 37.9, 33.3, 33.2, 31.6, 23.7, 22.0, 21.9, 18.8, 14.1.

$[\alpha]_D^{24} = -10.40$  (*c* = 0.50, CHCl<sub>3</sub>).

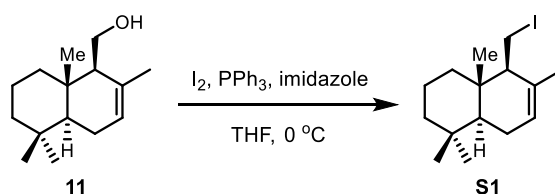

A solution of **11** (222 mg, 1.0 mmol, 1.0 equiv.), imidazole (170 mg, 2.5 mmol, 2.5 equiv.) and iodine (635 mg, 2.5 mmol, 2.5 equiv.) in dry THF (4 mL) was treated with PPh<sub>3</sub> (655 mg, 2.5 mmol, 2.5 equiv.) in THF (4 mL) dropwise at 0 °C. After stirring at 0 °C for 2 hours, the reaction was quenched with saturated aq. Na<sub>2</sub>S<sub>2</sub>O<sub>3</sub> solution (10 mL) and extracted with EtOAc (10 mL × 3). The combined organic phase was washed with brine, dried over anhydrous Na<sub>2</sub>SO<sub>4</sub>, filtered, and concentrated in vacuo. The residue was purified by flash column chromatography (hexane) to yield **S1** (199 mg, 60% yield) as faint yellow oil.

**<sup>1</sup>H NMR (600 MHz, CDCl<sub>3</sub>):** δ 5.37 – 5.47 (m, 1H), 3.50 (dd, *J* = 10.6, 2.0 Hz, 1H), 2.96 (dd, *J* = 10.6, 7.0 Hz, 1H), 2.44 – 2.51 (m, 1H), 1.90 – 2.01 (m, 5H), 1.77 – 1.87 (m, 1H), 1.52 – 1.56 (m, 1H), 1.45 – 1.52 (m, 1H), 1.38 – 1.44 (m, 1H), 1.11 – 1.21 (m, 4H), 0.87 (s, 3H), 0.85 (s, 3H), 0.79 (s, 3H).

**<sup>13</sup>C NMR (151 MHz, CDCl<sub>3</sub>):** δ 133.1, 123.9, 58.5, 50.2, 42.1, 39.2, 38.7, 33.2, 33.2, 23.7, 22.0, 21.9, 18.9, 13.4.

$[\alpha]_D^{24} = -45.80$  (*c* = 0.50, CHCl<sub>3</sub>).

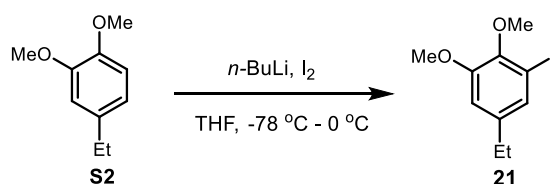

A solution of **S2** (1.66 g, 10 mmol, 1.0 equiv.) in dry THF (10 mL) was treated with *n*-BuLi (2.0 M in *n*-

hexane, 5.5 mL, 1.1 equiv.) in dropwise at -78 °C. The resulting mixture was warm to room temperature and stir for 2 hours. Add a solution of iodine (2.79 g, 11 mmol, 1.1 equiv.) in THF (10 mL) to the mixture at -78°C. The resulting mixture was stirred for 2 hours at room temperature. The solvents were evaporated and CH<sub>2</sub>Cl<sub>2</sub> (30 mL) was added. The organic layer was washed with aqueous NaHSO<sub>3</sub> (20%), aqueous saturated NaHCO<sub>3</sub> and aqueous saturated brine, and the layer was dried with Na<sub>2</sub>SO<sub>4</sub> and concentrated. The residue was purified by flash column chromatography (hexane / dichloromethane = 10:1) to afford **21** (2.57 g, 88% yield) as yellow oil.

**<sup>1</sup>H NMR (400 MHz, CDCl<sub>3</sub>):** δ 7.18 (d, *J* = 1.9 Hz, 1H), 6.71 (d, *J* = 1.9 Hz, 1H), 3.84 (s, 3H), 3.80 (s, 3H), 2.56 (q, *J* = 7.6 Hz, 2H), 1.21 (t, *J* = 7.6 Hz, 3H).

**<sup>13</sup>C NMR (101 MHz, CDCl<sub>3</sub>):** δ 152.4, 146.9, 142.4, 129.5, 112.7, 92.3, 60.4, 56.0, 28.3, 15.6.

**HRMS (ESI<sup>+</sup>):** calculated for C<sub>10</sub>H<sub>13</sub>IO<sub>2</sub>Na [M+Na]<sup>+</sup>: 314.9852, found 314.9852.

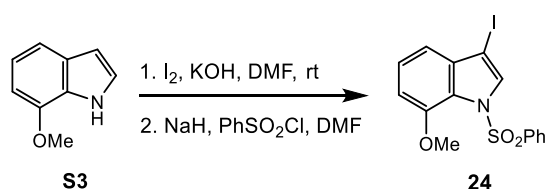

A solution of **S3** (1.47 g, 10 mmol, 1.0 equiv.) in dry DMF (10 mL) was treated with KOH (1.40 g, 25 mmol, 2.5 equiv.) and iodine (2.79 g, 11 mmol, 1.1 equiv.), The mixture was stirred for 2 hours at room temperature and was quenched by a saturated aqueous solution of Na<sub>2</sub>S<sub>2</sub>O<sub>3</sub> (20 mL), the aqueous phase was extracted with EtOAc (20 mL × 3). The organic layer was washed with water and aqueous saturated brine, and the layer was dried with Na<sub>2</sub>SO<sub>4</sub> and concentrated. The 3-iodo-indole derivative was not isolated and directly engaged in the protection step without any purification. The flask containing the crude product was flushed with Ar, then DMF (15 mL) was introduced and the mixture was stirred and cool to 0 °C using an ice bath. NaH (60% in oil, 1.2 equiv.) in added by portions and the mixture was stirred for an additional 20 minutes. Then, PhSO<sub>2</sub>Cl was introduced dropwise, the reaction was stirred at 0 °C for 30 minutes then the ice bath was removed and allowed to heat up to room temperature. The mixture was stirred for 3 hours at room temperature and was quenched by distilled water and a same volume of EtOAc. The layers were separated and the aqueous phase is extracted with two additional volumes of EtOAc. The organic phase was washed with water and brine, dried over Na<sub>2</sub>SO<sub>4</sub>, filtered and concentrated. The residue was purified by flash column chromatography (hexane / dichloromethane = 10:1) to afford **24** (3.10 g, 75% yield) as beige powder.

**<sup>1</sup>H NMR (400 MHz, CDCl<sub>3</sub>):** δ 7.97 (s, 1H), 7.81 – 7.89 (m, 2H), 7.53 – 7.62 (m, 1H), 7.45 – 7.51 (m, 2H), 7.21 (t, *J* = 7.9 Hz, 1H), 7.03 (dd, *J* = 8.0, 1.0 Hz, 1H), 6.74 (dd, *J* = 7.9, 0.9 Hz, 1H), 3.66 (s, 3H).

**<sup>13</sup>C NMR (101 MHz, CDCl<sub>3</sub>):** δ 147.1, 140.0, 135.3, 133.6, 132.1, 129.0, 127.5, 124.8, 124.3, 114.7, 107.8, 64.8, 55.7.

**HRMS (ESI+):** calculated for C<sub>15</sub>H<sub>12</sub>INO<sub>3</sub>SNa [M+Na]<sup>+</sup>: 435.9475, found 435.9475.

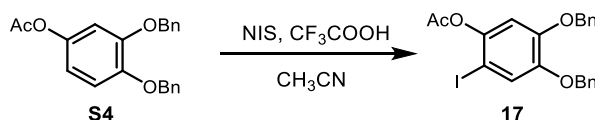

A solution of **S4** (2.0 g, 5.74 mmol, 1.0 equiv.) in CH<sub>3</sub>CN (30 mL) was treated with CF<sub>3</sub>COOH (196 mg, 1.72 mmol, 0.3 equiv.) and *N*-iodosuccinimide (1.42 g, 6.31 mmol, 1.1 equiv.) in CH<sub>3</sub>CN (10 mL) dropwise at room temperature. The reaction mixture was stirred at 40 °C for 2 hours and quenched with H<sub>2</sub>O (20 mL). The mixture was extracted with EtOAc (20 mL × 3). The combined organic phase was washed with brine, dried over anhydrous Na<sub>2</sub>SO<sub>4</sub>, filtered, and concentrated in vacuo. The residue was purified by flash column chromatography (hexane/ dichloromethane = 1:1) to give **17** (2.2 g, 81% yield) as white solid.

**<sup>1</sup>H NMR (400 MHz, CDCl<sub>3</sub>):** δ 7.29 – 7.50 (m, 11H), 6.74 (s, 1H), 5.10 (d, *J* = 3.4 Hz, 1H), 2.33 (s, 3H).

**<sup>13</sup>C NMR (101 MHz, CDCl<sub>3</sub>):** δ 169.0, 150.1, 147.8, 145.7, 136.7, 136.5, 128.7, 128.7, 128.7, 128.2, 128.2, 127.5, 127.5, 127.4, 124.4, 109.6, 78.7, 72.1, 71.5, 21.3.

**HRMS (ESI+):** calculated for C<sub>22</sub>H<sub>19</sub>IO<sub>4</sub>Na [M+Na]<sup>+</sup>: 497.0220, found 497.0219.

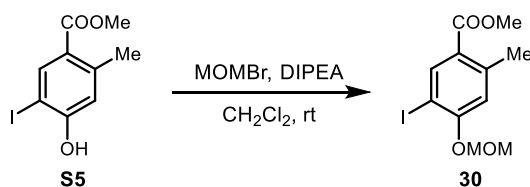

A solution of **S5** (1.69 g, 5.80 mmol, 1.0 equiv.) in dichloromethane (30 mL) was treated with DIPEA (897 mg, 6.95 mmol, 1.2 equiv.). Methoxybromomethane (868 g, 6.95 mmol, 1.2 equiv.) was added to the reaction mixture at room temperature. The reaction mixture was stirred at room temperature for 5 hours before it was quenched with H<sub>2</sub>O (20 mL). The mixture was extracted with EtOAc (20 mL × 3). The combined organic phase was washed with brine, dried over anhydrous Na<sub>2</sub>SO<sub>4</sub>, filtered, and concentrated in vacuo. The residue was purified by flash column chromatography (hexane/ EtOAc = 10:1) to give **30** (1.83 g, 94% yield) as white solid.



**<sup>1</sup>H NMR (600 MHz, CDCl<sub>3</sub>):** δ 8.34 (s, 1H), 6.87 (s, 1H), 5.26 (s, 2H), 3.84 (s, 3H), 3.49 (s, 3H), 2.55 (s, 3H).

**<sup>13</sup>C NMR (151 MHz, CDCl<sub>3</sub>):** δ 166.1, 158.6, 143.3, 142.1, 124.5, 116.9, 94.7, 82.6, 56.6, 51.9, 22.2.

**HRMS (ESI+):** calculated for C<sub>11</sub>H<sub>14</sub>IO<sub>4</sub> [M+H]<sup>+</sup>: 336.9931, found 336.9931.

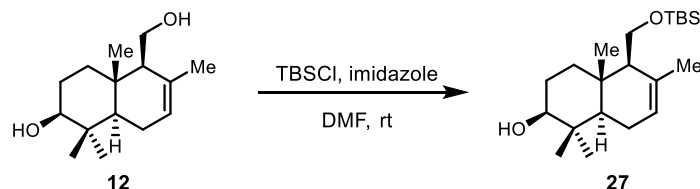

A solution of **12** (23.8 mg, 0.10 mmol, 1.0 equiv.) in DMF (2 mL) was treated with imidazole (6.8 mg, 0.10 mmol, 1.0 equiv.) and TBSCl (15.1 mg, 0.10 mmol, 1.0 equiv.). After stirring at 23 °C for 5 hours. The reaction was quenched with H<sub>2</sub>O (10 mL) and extracted with EtOAc (10 mL × 3). The combined organic phase was washed with brine, dried over anhydrous Na<sub>2</sub>SO<sub>4</sub>, filtered, and concentrated in vacuo. The residue was purified by flash column chromatography (hexane/ethyl acetate = 10:1) to give **27** (31.8 mg, 90% yield) as colorless oil.

**<sup>1</sup>H NMR (400 MHz, CDCl<sub>3</sub>):** δ 5.33 – 5.52 (m, 1H), 3.75 (dd, *J* = 10.5, 3.5 Hz, 1H), 3.62 (dd, *J* = 10.5, 5.8 Hz, 1H), 3.19 – 3.30 (m, 1H), 1.92 – 2.04 (m, 3H), 1.78 – 1.83 (m, 1H), 1.72 (s, 3H), 1.59 – 1.66 (m, 2H), 1.23 – 1.29 (m, 1H), 1.14 – 1.21 (m, 1H), 0.97 (s, 3H), 0.86 – 0.90 (m, 10H), 0.85 (s, 3H), 0.81 (s, 3H), 0.03 (s, 6H).

**<sup>13</sup>C NMR (101 MHz, CDCl<sub>3</sub>):** δ 134.3, 122.5, 79.2, 61.0, 56.9, 49.7, 38.8, 38.0, 35.9, 28.2, 27.6, 26.0, 26.0, 23.4, 22.0, 18.2, 15.4, 14.9, -5.3, -5.4.

[α]<sub>D</sub><sup>22</sup> = +2.20 (c = 0.50, CHCl<sub>3</sub>).

**HRMS (ESI+):** calculated for C<sub>21</sub>H<sub>41</sub>O<sub>2</sub>Si [M+H]<sup>+</sup>: 353.2870, found 353.2870.

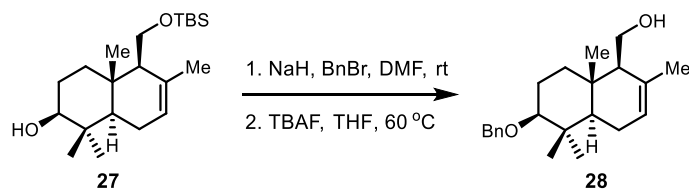

A solution of **27** (35.3 mg, 0.10 mmol, 1.0 equiv.) in DMF (2 mL) was treated with NaH (60% dispersion in mineral oil, 6 mg, 0.15 mmol, 1.5 equiv.) and BnBr (25.7 mg, 0.15 mmol, 1.5 equiv.). The reaction mixture was stirred at 23 °C for 10 hours before it was quenched with H<sub>2</sub>O (10 mL) and extracted with EtOAc (10

mL × 3). The combined organic phase was washed with brine, dried over anhydrous Na<sub>2</sub>SO<sub>4</sub>, filtered, and concentrated in vacuo. The residue was dissolved in THF (4 mL) and was treated with tetrabutylammonium fluoride xhydrate (85%, 65.8 mg, 0.20 mmol, 0.2 equiv.). The reaction mixture was stirred at 60 °C for 12 hours then quenched with H<sub>2</sub>O (10 mL) and extracted with EtOAc (10 mL × 3). The combined organic phase was washed with brine, dried over anhydrous Na<sub>2</sub>SO<sub>4</sub>, filtered, and concentrated in vacuo. The residue was purified by flash column chromatography (hexane/ethyl acetate = 10:1) to give **28** (30.2 mg, 92% yield) as white solid.

**<sup>1</sup>H NMR (400 MHz, CDCl<sub>3</sub>):** δ 7.28 – 7.39 (m, 4H), 7.27 (m, 1H), 5.50 – 5.59 (m, 1H), 4.68 (d, *J* = 11.9 Hz, 1H), 4.44 (d, *J* = 11.9 Hz, 1H), 3.86 (dd, *J* = 11.3, 3.5 Hz, 1H), 3.74 (dd, *J* = 11.3, 5.2 Hz, 1H), 2.96 (dd, *J* = 11.7, 3.9 Hz, 1H), 2.05 (dt, *J* = 13.3, 3.5 Hz, 1H), 1.93 – 2.02 (m, 2H), 1.81 – 1.89 (m, 2H), 1.78 (s, 3H), 1.49 – 1.63 (m, 2H), 1.16 – 1.22 (m, 2H), 0.99 (s, 3H), 0.92 (s, 3H), 0.87 (s, 3H).

**<sup>13</sup>C NMR (101 MHz, CDCl<sub>3</sub>):** δ 139.5, 132.9, 128.3, 127.5, 127.4, 124.2, 86.7, 71.6, 61.0, 57.2, 50.0, 38.9, 38.0, 36.0, 28.5, 23.3, 23.0, 21.9, 16.5, 15.1.

[α]<sub>D</sub><sup>22</sup> = +29.80 (c = 0.50, CHCl<sub>3</sub>).

**HRMS (ESI+):** calculated for C<sub>22</sub>H<sub>32</sub>O<sub>2</sub>Na [M+Na]<sup>+</sup>: 351.2295, found 351.2294.

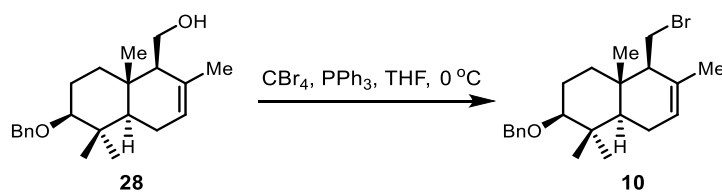

A solution of **28** (32.8 mg, 0.1 mmol, 1.0 equiv.) and carbon tetrabromide (83 mg, 0.25 mmol, 2.5 equiv.) in dry THF (2 mL) was treated with PPh<sub>3</sub> (65.5 mg, 0.25 mmol, 2.5 equiv.) in THF (2 mL) dropwise at 0 °C. The reaction mixture was stirred at 0 °C for 2 hours before it was quenched with MeOH (5 mL). The solution was concentrated in vacuo. The residue was purified by flash column chromatography (hexane/ethyl acetate = 100:1) to yield **10** (24.2 mg, 62% yield) as a colorless oil.

**<sup>1</sup>H NMR (400 MHz, CDCl<sub>3</sub>):** δ 7.31 – 7.39 (m, 4H), 7.24 – 7.30 (m, 1H), 5.36 – 5.64 (m, 1H), 4.68 (d, *J* = 11.8 Hz, 1H), 4.45 (d, *J* = 11.9 Hz, 1H), 3.65 (dd, *J* = 10.8, 2.2 Hz, 1H), 3.29 (dd, *J* = 10.8, 6.7 Hz, 1H), 2.96 (dd, *J* = 11.7, 3.8 Hz, 1H), 2.30 – 2.39 (m, 1H), 2.07 – 1.93 (m, 3H), 1.89 – 1.92 (m, 1H), 1.87 (s, 3H), 1.49 – 1.61 (m, 1H), 1.16 – 1.31 (m, 2H), 0.99 (s, 3H), 0.92 (s, 3H), 0.84 (s, 3H).

$^{13}\text{C}$  NMR (101 MHz,  $\text{CDCl}_3$ ):  $\delta$  139.4, 132.5, 128.3, 127.6, 127.4, 124.0, 86.4, 71.6, 57.8, 50.0, 39.0, 37.6, 37.4, 31.2, 28.3, 23.3, 22.9, 21.7, 16.4, 14.1.

$[\alpha]_D^{25} = +32.71$  ( $c = 1.33$ ,  $\text{CHCl}_3$ ).

HRMS (ESI+): calculated for  $\text{C}_{22}\text{H}_{32}\text{BrO}$   $[\text{M}+\text{H}]^+$ : 391.1631, found 391.1633.

### 5.3 Synthesis of (+)-*ent*-chromazonarol

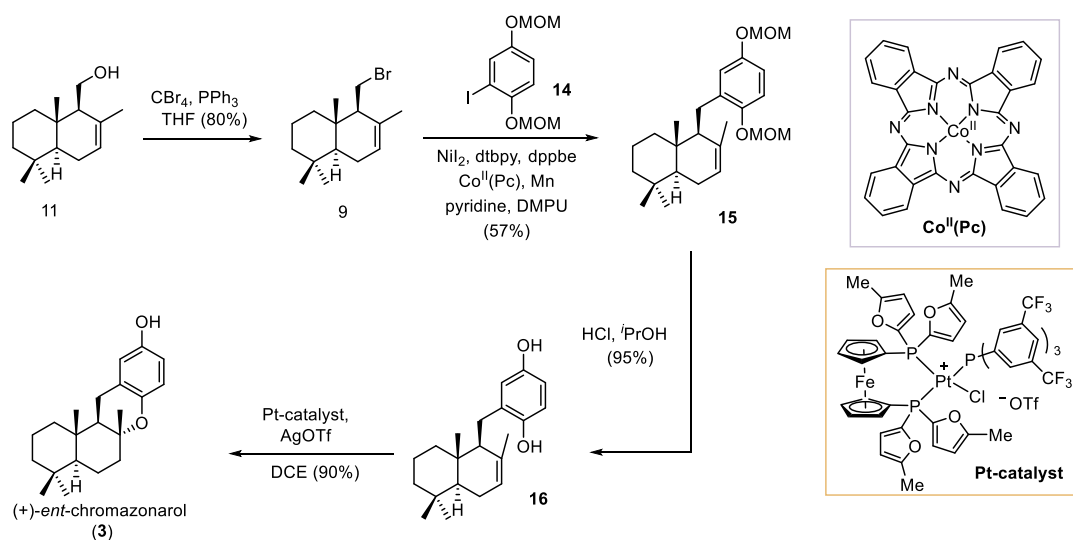

Figure S5. Synthetic route of (+)-*ent*-chromazonarol

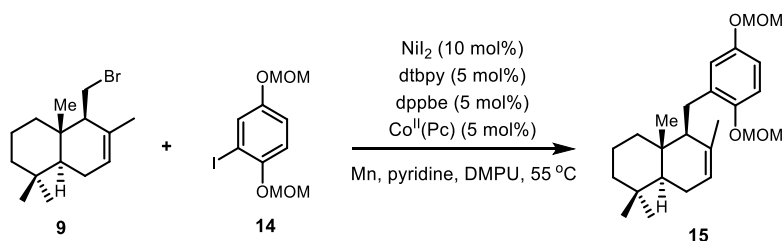

A solution of **9** (28.5 mg, 0.10 mmol, 1.0 equiv.) and **14** (27.7 mg, 0.10 mmol, 1.0 equiv.) in DMPU (0.3 mL) was treated with  $\text{NiI}_2$  (3.1 mg, 0.01 mmol, 10 mol%), 1,2-bis(diphenylphosphino)benzene (2.2 mg, 0.005 mmol, 5 mol%), 4,4'-di-*tert*-butyl-2,2'-dipyridyl (1.3 mg, 0.005 mmol, 5 mol%),  $\text{Co}^{\text{II}}(\text{Pc})$  (2.9 mg, 0.005 mmol, 5 mol%), manganese powder (11.0 mg, 0.20 mmol, 2.0 equiv.), and pyridine (1  $\mu\text{L}$ , 0.012 mmol, 12 mol%). The reaction mixture was heated to 55  $^\circ\text{C}$  and stirred at the same temperature for 16 hours. The reaction was quenched with saturated aq.  $\text{Na}_2\text{S}_2\text{O}_3$  solution (5 mL) and extracted with EtOAc (10 mL  $\times$  3). The combined organic phase was washed with brine, dried over anhydrous  $\text{Na}_2\text{SO}_4$ , filtered, and concentrated in vacuo. The residue was purified by flash column chromatography (hexane/ethyl acetate = 20:1) to yield **15** (22.9 mg, 57% yield) as colorless oil.

$^1\text{H}$  NMR (400 MHz,  $\text{CDCl}_3$ ):  $\delta$  6.92 – 7.01 (m, 2H), 6.80 (dd,  $J = 8.9, 3.0$  Hz, 1H), 5.38 (m, 1H), 5.13 (s,

2H), 5.11 (s, 2H), 3.48 (s, 3H), 3.47 (s, 3H), 2.73 (dd,  $J = 15.4, 9.3$  Hz, 1H), 2.59 (dd,  $J = 15.3, 2.6$  Hz, 1H), 2.31 – 2.41 (m, 1H), 1.83 – 2.04 (m, 3H), 1.49 – 1.56 (m, 1H), 1.46 (s, 3H), 1.39 – 1.46 (m, 2H), 1.29 (dd,  $J = 11.9, 4.9$  Hz, 1H), 1.16 – 1.25 (m, 1H), 1.05 – 1.15 (m, 1H), 0.91 (s, 3H), 0.90 (s, 3H), 0.88 (s, 3H).

$^{13}\text{C}$  NMR (151 MHz,  $\text{CDCl}_3$ ):  $\delta$  152.0, 150.3, 135.9, 134.6, 122.3, 118.4, 115.4, 113.7, 95.4, 95.3, 56.1, 56.0, 54.5, 50.5, 42.4, 39.7, 37.0, 33.4, 33.2, 26.5, 23.9, 22.5, 22.1, 19.1, 14.1.

$[\alpha]_D^{23} = -16.09$  ( $c = 1.10, \text{CHCl}_3$ ).

HRMS (ESI+): calculated for  $\text{C}_{25}\text{H}_{39}\text{O}_4$   $[\text{M}+\text{H}]^+$ : 403.2843, found 403.2840.

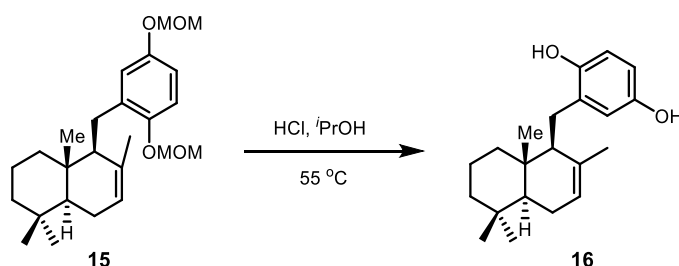

A solution of **15** (40.2 mg, 0.10 mmol, 1.0 equiv.) in *i*PrOH (2 mL) was treated with two drops of concentrated hydrochloric acid. The reaction mixture was stirred at 55 °C for 1 hour before it was quenched with  $\text{H}_2\text{O}$  (10 mL) and extracted with EtOAc (10 mL  $\times$  3). The combined organic phase was washed with brine, dried over anhydrous  $\text{Na}_2\text{SO}_4$ , filtered, and concentrated in vacuo. The residue was purified by flash column chromatography (hexane/ethyl acetate = 5:1) to give **16** (29.8 mg, 95% yield) as white solid.

$^1\text{H}$  NMR (600 MHz,  $\text{CDCl}_3$ ):  $\delta$  6.74 (d,  $J = 2.9$  Hz, 1H), 6.60 (d,  $J = 8.5$  Hz, 1H), 6.51 (dd,  $J = 8.5, 3.0$  Hz, 1H), 5.38 (m, 1H), 4.63 (br, 2H), 2.55 – 2.63 (m, 2H), 2.31 – 2.37 (m, 1H), 1.96 – 2.04 (m, 1H), 1.84 – 1.94 (m, 2H), 1.51 – 1.60 (m, 1H), 1.47 (s, 3H), 1.40 – 1.46 (m, 2H), 1.28 (dd,  $J = 12.1, 4.8$  Hz, 1H), 1.16 – 1.23 (m, 1H), 1.07 – 1.13 (m, 1H), 0.91 (s, 3H), 0.89 (s, 3H), 0.88 (s, 3H).

$^{13}\text{C}$  NMR (151 MHz,  $\text{CDCl}_3$ ):  $\delta$  149.4, 147.2, 135.5, 131.5, 122.5, 116.7, 116.2, 112.95, 54.4, 50.5, 42.4, 39.7, 37.0, 33.4, 33.2, 26.3, 23.9, 22.4, 22.1, 19.1, 14.1.

$[\alpha]_D^{23} = -17.25$  ( $c = 0.80, \text{CHCl}_3$ ).

HRMS (ESI+): calculated for  $\text{C}_{21}\text{H}_{29}\text{O}_2$   $[\text{M}-\text{H}]^-$ : 313.2162, found 313.2170.

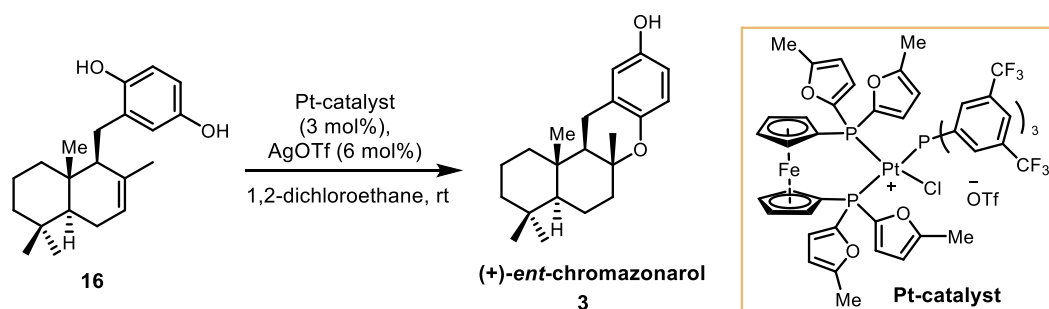

In an argon filled glovebox, to a 4 mL vial with a magnetic stir bar were added the Pt-catalyst<sup>1</sup> (4.9 mg, 3 mol%), silver trifluoromethanesulfonate (1.5 mg, 6 mol%), the substrate **16** (31.4 mg, 0.1 mmol, 1.0 equiv.), and ClCH<sub>2</sub>CH<sub>2</sub>Cl (1 mL). The resulting mixture was stirred at room temperature (23 °C) for 15 h. The reaction mixture was diluted with CH<sub>2</sub>Cl<sub>2</sub>, filtered through a pad of celite and concentrated. The residue was purified with flash column chromatography (hexane/ethyl acetate = 10:1, silica gel) to yield **3** (28.3 mg, 90% yield) as colorless oil.

**<sup>1</sup>H NMR (400 MHz, CDCl<sub>3</sub>):** δ 6.63 (d, *J* = 8.4 Hz, 1H), 6.52 – 6.59 (m, 2H), 4.43 (br, 1H, OH), 2.54 – 2.60 (m, 2H), 2.04 (dt, *J* = 12.5, 3.2 Hz, 1H), 1.72 – 1.78 (m, 1H), 1.61 – 1.71 (m, 4H), 1.36 – 1.50 (m, 3H), 1.15 – 1.21 (m, 4H), 1.02 (dd, *J* = 12.2, 2.3 Hz, 1H), 0.94 – 0.98 (m, 1H), 0.90 (s, 3H), 0.88 (s, 3H), 0.84 (s, 3H).

**<sup>13</sup>C NMR (151 MHz, CDCl<sub>3</sub>):** δ 148.6, 147.3, 123.4, 117.7, 115.9, 114.4, 76.8, 56.3, 52.2, 42.0, 41.3, 39.4, 36.9, 33.6, 33.3, 22.6, 21.8, 20.8, 19.9, 18.7, 15.0.

$[\alpha]_D^{22} = +42.00$  (c = 0.35, CHCl<sub>3</sub>).

**HRMS (ESI+):** calculated for C<sub>21</sub>H<sub>29</sub>O<sub>2</sub> [M-H]<sup>-</sup>: 313.2162, found 313.2169.

## 5.4 Synthesis of (+)-8-*epi*-puupehenol

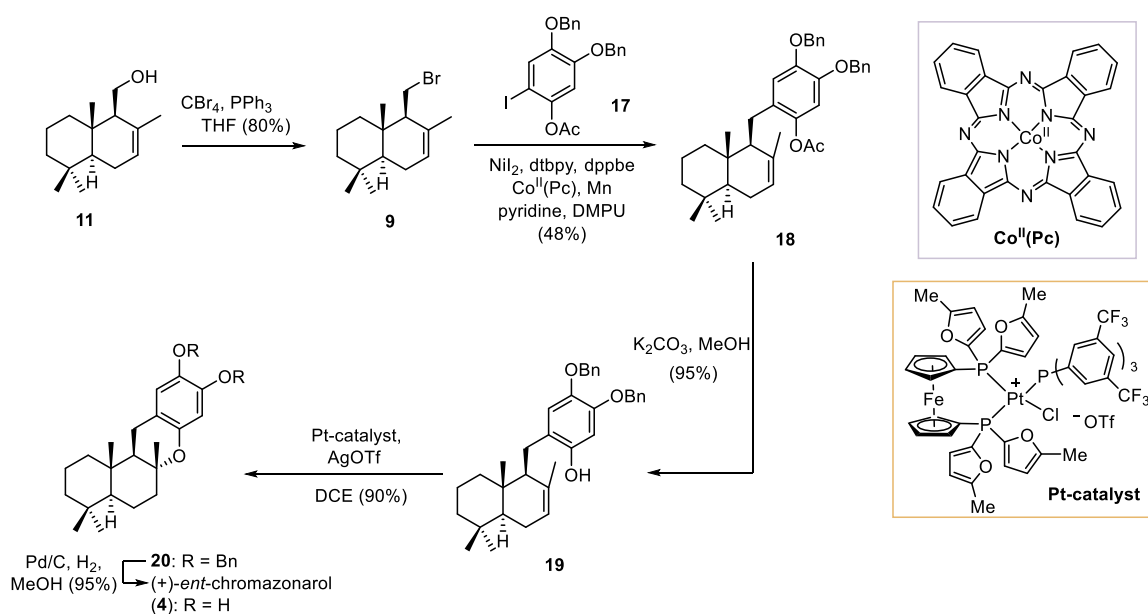

Figure S6. Synthetic route of (+)-8-*epi*-puupehenol

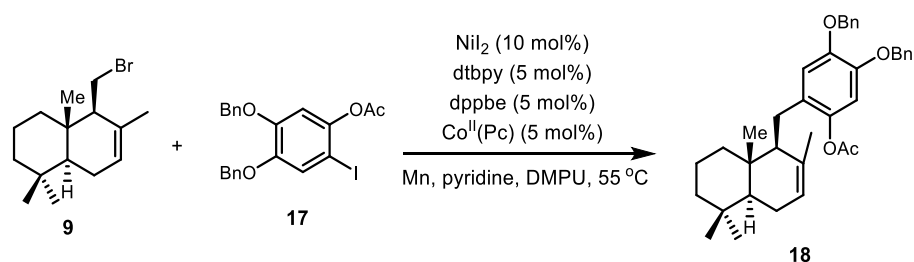

A solution of **9** (28.5 mg, 0.10 mmol, 1.0 equiv.) and **17** (47.4 mg, 0.10 mmol, 1.0 equiv.) in DMPU (0.3 mL) was treated with NiI<sub>2</sub> (3.1 mg, 0.01 mmol, 10 mol%), 1,2-bis(diphenylphosphino)benzene (2.2 mg, 0.005 mmol, 5 mol%), 4,4'-di-*tert*-butyl-2,2'-dipyridyl (1.3 mg, 0.005 mmol, 5 mol%), Co<sup>II</sup>(Pc) (2.9 mg, 0.005 mmol, 5 mol%), manganese powder (11.0 mg, 0.20 mmol, 2.0 equiv.) and pyridine (1 μL, 0.012 mmol, 12 mol%). The reaction mixture was heated to 55 °C for 16 hours then quenched with saturated aq. Na<sub>2</sub>S<sub>2</sub>O<sub>3</sub> solution (5 mL). The mixture was extracted with EtOAc (10 mL × 3). The combined organic phase was washed with brine, dried over anhydrous Na<sub>2</sub>SO<sub>4</sub>, filtered, and concentrated in vacuo. The residue was purified by flash column chromatography (hexane/ethyl acetate = 10:1) to yield **18** (26.5 mg, 48% yield) as colorless oil.

**<sup>1</sup>H NMR (400 MHz, CDCl<sub>3</sub>):** δ 7.26 – 7.49 (m, 10H), 6.83 (s, 1H), 6.62 (s, 1H), 5.31 – 5.42 (m, 1H), 5.13 (s, 2H), 5.09 (s, 2H), 2.45 (dd, *J* = 15.5, 3.1 Hz, 1H), 2.28 (m, 4H), 2.08 – 2.17 (m, 1H), 1.92 – 2.04 (m, 1H), 1.79 – 1.91 (m, 1H), 1.74 (d, *J* = 12.9 Hz, 1H), 1.40 – 1.53 (m, 3H), 1.37 (s, 3H), 1.13 – 1.24 (m, 2H), 0.86

- 0.96 (m, 7H), 0.81 (s, 3H).

$^{13}\text{C}$  NMR (101 MHz,  $\text{CDCl}_3$ ):  $\delta$  169.8, 147.5, 146.6, 142.4, 137.5, 137.0, 135.2, 128.6, 128.0, 127.9, 127.6, 122.6, 117.0, 109.2, 72.3, 71.5, 54.6, 50.4, 42.3, 39.7, 36.9, 33.4, 33.2, 26.4, 23.8, 22.5, 22.1, 21.1, 19.0, 14.0.

$[\alpha]_D^{23} = -14.67$  ( $c = 0.90$ ,  $\text{CHCl}_3$ ).

HRMS (ESI+): calculated for  $\text{C}_{37}\text{H}_{44}\text{O}_4\text{Na}$   $[\text{M}+\text{Na}]^+$ : 575.3132, found 575.3128.

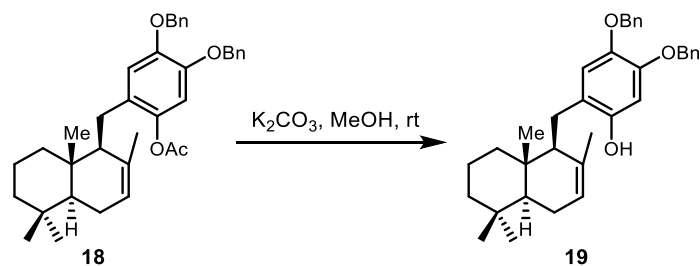

A solution of **18** (55.3 mg, 0.10 mmol, 1.0 equiv.) in MeOH (2 mL) was treated with  $\text{K}_2\text{CO}_3$  (27.6 mg, 0.2 mmol, 2.0 equiv.). The reaction mixture was stirred at 23 °C for 5 hours before it was quenched with  $\text{H}_2\text{O}$  (10 mL) and extracted with EtOAc (10 mL  $\times$  3). The combined organic phase was washed with brine, dried over anhydrous  $\text{Na}_2\text{SO}_4$ , filtered, and concentrated in vacuo. The residue was purified by flash column chromatography (hexane/ethyl acetate = 5:1) to give **19** (48.5 mg, 95% yield) as colorless oil.

$^1\text{H}$  NMR (400 MHz,  $\text{CDCl}_3$ ):  $\delta$  7.39 – 7.48 (m, 4H), 7.27 – 7.38 (m, 6H), 6.76 (s, 1H), 6.39 (s, 1H), 5.34 – 5.39 (m, 1H), 5.07 (s, 4H), 4.67 (s, 1H), 2.51 (dd,  $J = 15.3, 3.2$  Hz, 1H), 2.44 (dd,  $J = 15.2, 8.7$  Hz, 1H), 2.13 – 2.22 (m, 1H), 1.93 – 2.06 (m, 1H), 1.79 – 1.93 (m, 2H), 1.48 – 1.57 (m, 1H), 1.37 – 1.48 (m, 5H), 1.19 – 1.26 (m, 2H), 0.94 – 1.03 (m, 1H), 0.91 (s, 3H), 0.90 (s, 3H), 0.85 (s, 3H).

$^{13}\text{C}$  NMR (151 MHz,  $\text{CDCl}_3$ ):  $\delta$  148.0, 147.9, 142.5, 137.8, 137.3, 135.5, 128.6, 128.5, 127.9, 127.9, 127.9, 127.5, 122.4, 121.8, 119.4, 103.8, 73.3, 71.5, 54.4, 50.4, 42.4, 39.7, 37.0, 33.4, 33.2, 25.9, 23.9, 22.4, 22.1, 19.1, 14.0.

$[\alpha]_D^{22} = -16.91$  ( $c = 0.55$ ,  $\text{CHCl}_3$ ).

HRMS (ESI+): calculated for  $\text{C}_{35}\text{H}_{41}\text{O}_3$   $[\text{M}-\text{H}]^-$ : 509.3050, found 509.3053.

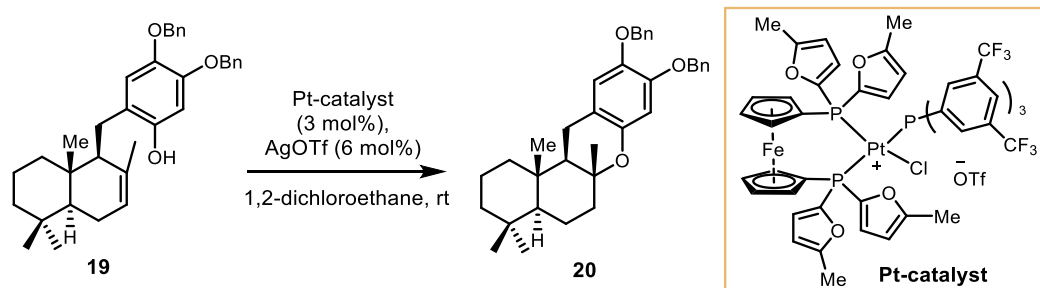

In an argon filled glovebox, to a 4 mL vial with a magnetic stir bar were added the Pt-catalyst (4.9 mg, 3 mol%), silver trifluoromethanesulfonate (1.5 mg, 6 mol%), **19** (51.1 mg, 0.1 mmol, 1.0 equiv.), and  $\text{ClCH}_2\text{CH}_2\text{Cl}$  (1 mL). After stirring at room temperature (23 °C) for 12 h, the reaction mixture was diluted with  $\text{CH}_2\text{Cl}_2$ , filtered through a pad of celite and concentrated. The residue was purified by flash column chromatography (hexane/ethyl acetate = 10:1) to yield **20** (48.0 mg, 94% yield) as colorless oil.

**$^1\text{H NMR}$  (600 MHz,  $\text{CDCl}_3$ ):**  $\delta$  7.44 (d,  $J = 7.5$  Hz, 4H), 7.35 (q,  $J = 6.9$  Hz, 4H), 7.27 – 7.32 (m, 2H), 6.67 (s, 1H), 6.44 (s, 1H), 5.02 – 5.09 (m, 4H), 2.50 (d,  $J = 9.1$  Hz, 2H), 2.00 – 2.07 (m, 1H), 1.73 – 1.79 (m, 1H), 1.64 – 1.71 (m, 2H), 1.58 – 1.63 (m, 2H), 1.44 – 1.51 (m, 1H), 1.30 – 1.42 (m, 2H), 1.18 (s, 3H), 1.10 – 1.15 (m, 1H), 0.94 – 1.06 (m, 2H), 0.91 (s, 3H), 0.88 (s, 3H), 0.85 (s, 3H).

**$^{13}\text{C NMR}$  (151 MHz,  $\text{CDCl}_3$ ):**  $\delta$  148.9, 148.0, 142.5, 138.1, 137.5, 128.5, 128.5, 127.8, 127.7, 127.7, 127.5, 117.9, 114.0, 103.8, 77.0, 73.0, 71.1, 56.3, 52.4, 42.0, 41.2, 39.4, 37.0, 33.6, 33.3, 22.0, 21.7, 20.9, 19.9, 18.7, 15.0.

$[\alpha]_D^{21} = +27.20$  ( $c = 1.00$ ,  $\text{CHCl}_3$ ).

**HRMS (ESI+):** calculated for  $\text{C}_{35}\text{H}_{43}\text{O}_3$   $[\text{M}+\text{H}]^+$ : 511.3207, found 511.3206.

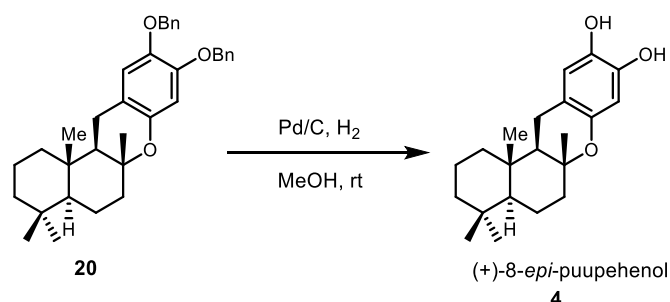

A solution of **20** (51.1 mg, 0.10 mmol, 1.0 equiv.) in MeOH (2 mL) was treated with Pd (10% on carbon, 32 mg, 0.03 mmol, 0.3 equiv.). The reaction mixture was stirred at 23 °C under hydrogen atmosphere (1 atm) for 3 hours then filtered, and concentrated in vacuo. The residue was purified by flash column chromatography (hexane/ethyl acetate = 3:1) to give **4** (31.3 mg, 95% yield) as colorless oil.



**<sup>1</sup>H NMR (600 MHz, Acetone-*d*<sub>6</sub>):** δ 7.61 (s, 1H), 7.20 (s, 1H), 6.50 (s, 1H), 6.19 (s, 1H), 2.40 – 2.51 (m, 2H), 1.96 (dt, *J* = 12.5, 3.2 Hz, 1H), 1.64 – 1.76 (m, 3H), 1.59 (dd, *J* = 13.0, 4.4 Hz, 1H), 1.53 (dd, *J* = 11.4, 7.0 Hz, 1H), 1.43 – 1.47 (m, 1H), 1.38 – 1.42 (m, 2H), 1.18 – 1.23 (m, 1H), 1.13 (s, 3H), 1.06 (dd, *J* = 12.4, 2.5 Hz, 1H), 0.98 – 1.02 (m, 1H), 0.90 (s, 6H), 0.86 (s, 3H).

**<sup>13</sup>C NMR (151 MHz, Acetone-*d*<sub>6</sub>):** δ 147.1, 144.9, 139.3, 116.3, 113.3, 104.5, 76.6, 56.9, 53.5, 42.6, 42.0, 39.9, 37.5, 33.8, 33.8, 22.3, 21.9, 21.0, 20.4, 19.2, 15.2.

$[\alpha]_D^{25} = +43.83$  (*c* = 0.60, CHCl<sub>3</sub>).

**HRMS (ESI+):** calculated for C<sub>21</sub>H<sub>29</sub>O<sub>3</sub> [M-H]<sup>-</sup>: 329.2111, found 329.2115.

### 5.5 Synthesis of (-)-pelorol

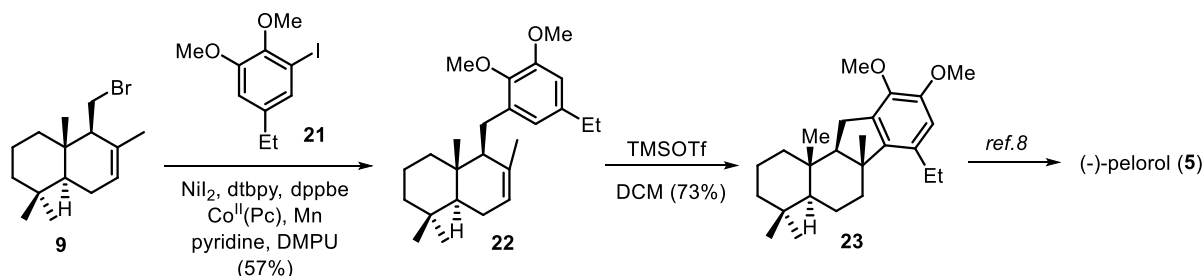

**Figure S7.** Synthetic route of (-)-pelorol<sup>8</sup>

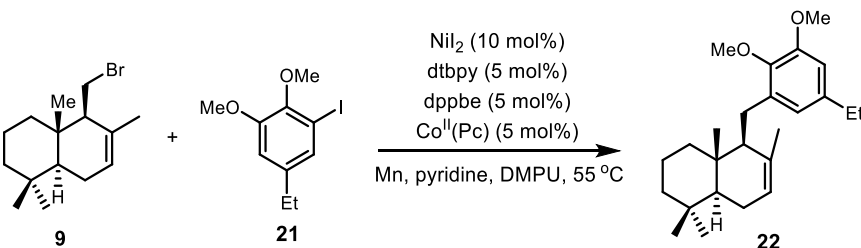

A solution of **9** (28.5 mg, 0.10 mmol, 1.0 equiv.) and **21** (29.2 mg, 0.10 mmol, 1.0 equiv.) in DMPU (0.3 mL) was treated with NiI<sub>2</sub> (3.1 mg, 0.01 mmol, 10 mol%), 1,2-bis(diphenylphosphino)benzene (2.2 mg, 0.005 mmol, 5 mol%), 4,4'-di-*tert*-butyl-2,2'-dipyridyl (1.3 mg, 0.005 mmol, 5 mol%), Co<sup>II</sup>(Pc) (2.9 mg, 0.005 mmol, 5 mol%), manganese powder (11.0 mg, 0.20 mmol, 2.0 equiv.) and pyridine (1 μL, 0.012 mmol, 12 mol%). The reaction mixture was heated to 55 °C for 16 hours then quenched with saturated aq. Na<sub>2</sub>S<sub>2</sub>O<sub>3</sub> solution (5 mL) and extracted with EtOAc (10 mL × 3). The combined organic extracts were washed with brine, dried over anhydrous Na<sub>2</sub>SO<sub>4</sub>, filtered, and concentrated in vacuo. The residue was purified by flash column chromatography (hexane/ethyl acetate = 10:1) to yield **22** (21.1 mg, 57% yield) as colorless oil.

**<sup>1</sup>H NMR (400 MHz, CDCl<sub>3</sub>):** δ 6.69 (d, *J* = 2.0 Hz, 1H), 6.57 (d, *J* = 1.9 Hz, 1H), 5.29 – 5.48 (m, 1H), 3.85

(s, 3H), 3.77 (s, 3H), 2.71 (dd,  $J = 15.1, 9.2$  Hz, 1H), 2.64 (d,  $J = 2.8$  Hz, 1H), 2.59 (q,  $J = 7.5$  Hz, 2H), 2.31 – 2.43 (m, 1H), 1.83 – 2.06 (m, 3H), 1.52 – 1.59 (m, 1H), 1.40 – 1.51 (m, 5H), 1.30 (dd,  $J = 11.9, 4.9$  Hz, 1H), 1.23 (t,  $J = 7.6$  Hz, 3H), 1.18 (dd,  $J = 8.1, 3.7$  Hz, 1H), 1.12 (dd,  $J = 13.1, 3.8$  Hz, 1H), 0.92 (s, 3H), 0.91 (s, 3H), 0.89 (s, 3H).

$^{13}\text{C}$  NMR (101 MHz,  $\text{CDCl}_3$ ):  $\delta$  152.5, 144.9, 139.6, 137.4, 136.1, 122.0, 120.6, 109.1, 60.5, 55.7, 54.6, 50.4, 42.4, 39.6, 37.0, 33.4, 33.2, 29.1, 26.3, 23.9, 22.6, 22.2, 19.1, 16.0, 14.1.

$[\alpha]_D^{24} = -10.87$  ( $c = 3.10$ ,  $\text{CHCl}_3$ ).

HRMS (ESI+): calculated for  $\text{C}_{25}\text{H}_{38}\text{O}_2\text{Na}$   $[\text{M}+\text{Na}]^+$ : 393.2764, found 393.2761.

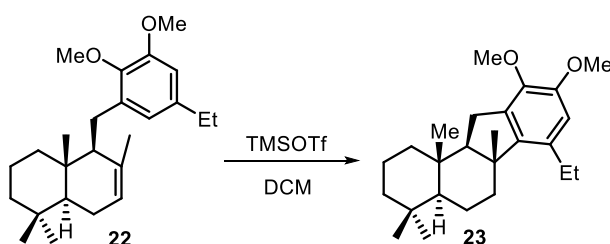

A solution of **22** (37.1 mg, 0.10 mmol, 1.0 equiv.) in  $\text{CH}_2\text{Cl}_2$  (2 mL) was stirred at 0 °C for 0.5 hours, trimethylsilyl triflate (44.4 mg, 0.2 mmol, 2.0 equiv.) was added. Then the reaction mixture was stirred at 25 °C for 2.5 h. After completion of the reaction, the reaction mixture was quenched with sat.  $\text{NaHCO}_3$  solution (10 ml). Then it was extracted with  $\text{CH}_2\text{Cl}_2$  (15 ml x 3). The combined organic extracts were washed with brine, dried over anhydrous  $\text{Na}_2\text{SO}_4$ , filtered, and concentrated in vacuo. The residue was purified by flash column chromatography (hexane/ethyl acetate = 10:1) to yield **23** (27.1 mg, 73% yield) as colorless oil.

$^1\text{H}$  NMR (400 MHz,  $\text{CDCl}_3$ ):  $\delta$  6.51 (s, 1H), 3.83 (s, 3H), 3.82 (s, 3H), 2.73 (dd,  $J = 6.8, 4.6$  Hz, 1H), 2.69 (dd,  $J = 6.8, 4.4$  Hz, 1H), 2.56 – 2.63 (m, 1H), 2.51 (dd,  $J = 14.8, 12.8$  Hz, 1H), 2.38 (dt,  $J = 12.0, 3.2$  Hz, 1H), 1.80 (dd,  $J = 12.6, 3.9$  Hz, 1H), 1.68 – 1.76 (m, 3H), 1.54 – 1.60 (m, 2H), 1.37 – 1.46 (m, 2H), 1.24 (t,  $J = 7.6$  Hz, 3H), 1.17 (dd,  $J = 13.1, 4.2$  Hz, 1H), 1.11 (s, 3H), 1.04 (s, 3H), 0.95 – 1.02 (m, 2H), 0.88 (s, 6H).

$^{13}\text{C}$  NMR (101 MHz,  $\text{CDCl}_3$ ):  $\delta$  150.5, 145.0, 143.7, 136.0, 133.9, 111.2, 64.4, 60.5, 57.2, 56.1, 48.0, 42.7, 40.3, 39.4, 37.2, 33.5, 33.2, 25.4, 24.8, 21.5, 21.3, 19.8, 18.5, 16.3, 16.2.

$[\alpha]_D^{24} = +8.50$  ( $c = 1.60$ ,  $\text{CHCl}_3$ ).

HRMS (ESI+): calculated for  $\text{C}_{25}\text{H}_{38}\text{O}_2\text{Na}$   $[\text{M}+\text{Na}]^+$ : 393.2764, found 393.2760.

## 5.6 Synthesis of (-)-mycoleptodiscin A

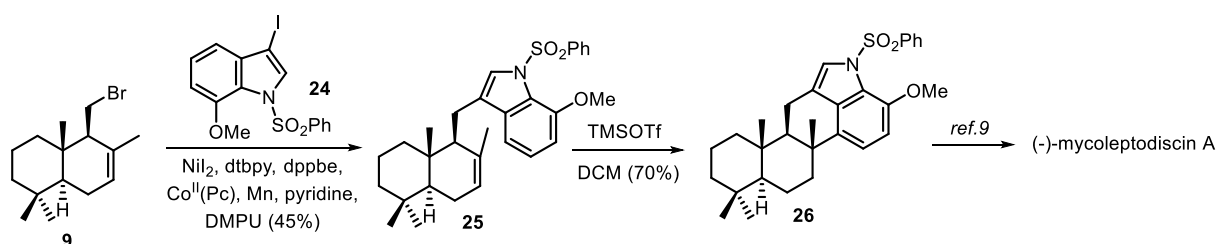

**Figure S8.** Synthetic route of (-)-mycoleptodiscin A<sup>9</sup>

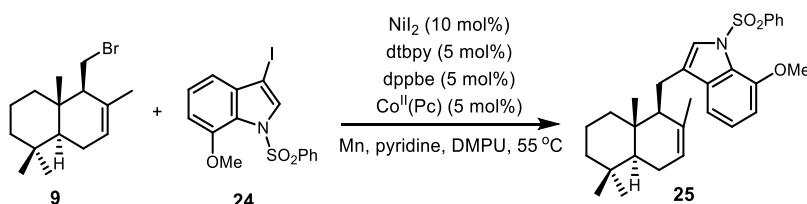

A solution of **9** (28.5 mg, 0.10 mmol, 1.0 equiv.) and **24** (41.3 mg, 0.10 mmol, 1.0 equiv.) in DMPU (0.3 mL) was treated with NiI<sub>2</sub> (3.1 mg, 0.01 mmol, 10 mol%), 1,2-bis(diphenylphosphino)benzene (2.2 mg, 0.005 mmol, 5 mol%), 4,4'-di-tert-butyl-2,2'-dipyridyl (1.3 mg, 0.005 mmol, 5 mol%), Co<sup>II</sup>(Pc) (2.9 mg, 0.005 mmol, 5 mol%), manganese powder (11.0 mg, 0.20 mmol, 2.0 equiv.) and pyridine (1 μL, 0.012 mmol, 12 mol%). The reaction mixture was heated to 55 °C for 16 hours then quenched with saturated aq. Na<sub>2</sub>S<sub>2</sub>O<sub>3</sub> solution (5 mL) and extracted with EtOAc (10 mL × 3). The combined organic extracts were washed with brine, dried over anhydrous Na<sub>2</sub>SO<sub>4</sub>, filtered, and concentrated in vacuo. The residue was purified by flash column chromatography (hexane/ethyl acetate = 10:1) to yield **25** (22.1 mg, 45% yield) as colorless oil.

**<sup>1</sup>H NMR (400 MHz, CDCl<sub>3</sub>):** δ 7.83 (s, 1H), 7.81 (s, 1H), 7.64 (s, 1H), 7.50 – 7.56 (m, 1H), 7.46 (t, *J* = 7.8 Hz, 2H), 7.10 – 7.20 (m, 2H), 6.68 (d, *J* = 7.6 Hz, 1H), 5.39 – 5.57 (m, 1H), 3.65 (s, 3H), 2.82 (dt, *J* = 16.1, 2.0 Hz, 1H), 2.57 (dd, *J* = 16.1, 9.4 Hz, 1H), 2.44 – 2.50 (m, 1H), 2.02 – 2.09 (m, 1H), 1.89 – 2.00 (m, 2H), 1.60 – 1.64 (m, 1H), 1.54 (s, 3H), 1.43 – 1.52 (m, 2H), 1.35 (dd, *J* = 12.2, 4.7 Hz, 1H), 1.21 – 1.28 (m, 1H), 1.18 (td, *J* = 13.0, 3.6 Hz, 1H), 0.94 (s, 3H), 0.93 (s, 3H), 0.92 (s, 3H).

**<sup>13</sup>C NMR (151 MHz, CDCl<sub>3</sub>):** δ 147.5, 140.7, 134.9, 134.2, 133.1, 128.8, 127.2, 125.6, 124.9, 123.9, 123.1, 123.0, 112.2, 107.1, 55.5, 53.6, 50.3, 42.4, 39.7, 37.0, 33.4, 33.2, 24.0, 22.8, 22.1, 19.0, 13.8.

[α]<sub>D</sub><sup>24</sup> = +3.63 (c = 2.40, CHCl<sub>3</sub>).

**HRMS (ESI+):** calculated for C<sub>30</sub>H<sub>37</sub>NO<sub>3</sub>SNa [M+Na]<sup>+</sup>: 514.2386, found 514.2388.

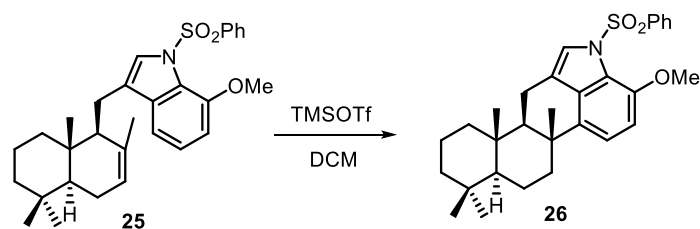

A solution of **25** (49.2 mg, 0.10 mmol, 1.0 equiv.) in  $\text{CH}_2\text{Cl}_2$  (2 mL) was stirred at 0 °C for 0.5 hours, trimethylsilyl triflate (44.4 mg, 0.2 mmol, 2.0 equiv.) was added. Then the reaction mixture was stirred at 25 °C for 2.5 h. After completion of the reaction, the reaction mixture was quenched with sat.  $\text{NaHCO}_3$  solution (10 ml). Then it was extracted with  $\text{CH}_2\text{Cl}_2$  (15 ml x 3). The combined organic extracts were washed with brine, dried over anhydrous  $\text{Na}_2\text{SO}_4$ , filtered, and concentrated in vacuo. The residue was purified by flash column chromatography (hexane/ethyl acetate = 10:1) to yield **26** (34.4 mg, 70% yield) as colorless oil.

**$^1\text{H}$  NMR (400 MHz,  $\text{CDCl}_3$ ):**  $\delta$  7.87 – 7.94 (m, 2H), 7.48 – 7.57 (m, 1H), 7.40 – 7.48 (m, 3H), 6.87 (d,  $J$  = 8.0 Hz, 1H), 6.62 (d,  $J$  = 8.0 Hz, 1H), 3.68 (s, 3H), 2.91 (dd,  $J$  = 15.7, 3.4 Hz, 1H), 2.61 (ddd,  $J$  = 15.5, 12.9, 2.1 Hz, 1H), 2.32 – 2.49 (m, 1H), 1.81 – 1.90 (m, 1H), 1.66 – 1.77 (m, 2H), 1.62 – 1.66 (m, 2H), 1.49 – 1.54 (m, 2H), 1.43 – 1.49 (m, 2H), 1.35 – 1.40 (m, 1H), 1.12 (s, 3H), 1.04 (s, 3H), 0.88 – 0.93 (m, 1H), 0.88 (s, 6H).

**$^{13}\text{C}$  NMR (151 MHz,  $\text{CDCl}_3$ ):**  $\delta$  145.2, 140.4, 138.7, 133.1, 130.8, 128.8, 127.7, 122.4, 121.5, 118.7, 116.6, 108.0, 56.7, 56.5, 56.0, 42.0, 40.3, 39.0, 38.2, 37.3, 33.6, 33.5, 25.1, 21.7, 18.9, 18.8, 18.1, 16.4.

$[\alpha]_D^{24} = +26.0$  ( $c = 0.50$ ,  $\text{CHCl}_3$ ).

**HRMS (ESI+):** calculated for  $\text{C}_{30}\text{H}_{37}\text{NO}_3\text{SNa}$   $[\text{M}+\text{Na}]^+$ : 514.2386, found 514.2386.

## 5.7 Synthesis of (+)-hongoquercin A

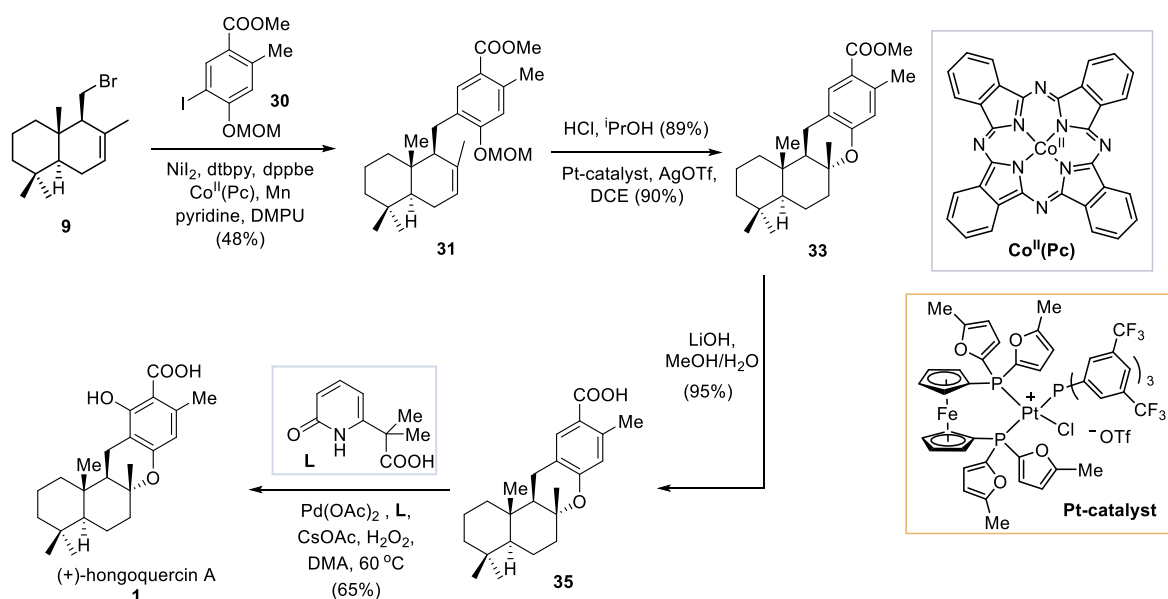

Figure S9. Synthetic route of (+)-hongoquercin A

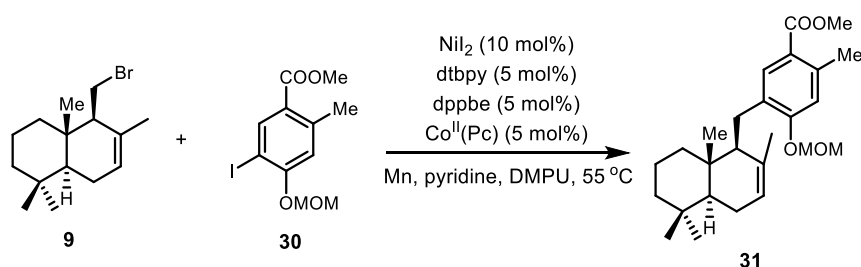

A solution of **9** (28.5 mg, 0.10 mmol, 1.0 equiv.) and **30** (33.6 mg, 0.10 mmol, 1.0 equiv.) in DMPU (0.3 mL) was treated with  $\text{NiI}_2$  (3.1 mg, 0.01 mmol, 10 mol%), 1,2-bis(diphenylphosphino)benzene (2.2 mg, 0.005 mmol, 5 mol%), 4,4'-di-tert-butyl-2,2'-dipyridyl (1.3 mg, 0.005 mmol, 5 mol%),  $\text{Co}^{\text{II}}(\text{Pc})$  (2.9 mg, 0.005 mmol, 5 mol%), manganese powder (11.0 mg, 0.20 mmol, 2.0 equiv.) and pyridine (1  $\mu\text{L}$ , 0.012 mmol, 12 mol%). The reaction mixture was heated to  $55^\circ\text{C}$  for 16 hours then quenched with saturated aq.  $\text{Na}_2\text{S}_2\text{O}_3$  solution (5 mL) and extracted with EtOAc (10 mL  $\times$  3). The combined organic extracts were washed with brine, dried over anhydrous  $\text{Na}_2\text{SO}_4$ , filtered, and concentrated in vacuo. The residue was purified by flash column chromatography (hexane/ethyl acetate = 10:1) to yield **31** (19.9 mg, 48% yield) as colorless oil.

$^1\text{H NMR}$  (600 MHz,  $\text{CDCl}_3$ ):  $\delta$  7.85 (s, 1H), 6.88 (s, 1H), 5.36 – 5.40 (m, 1H), 5.23 5.23 (d,  $J = 1.5$  Hz, 2H), 3.86 (s, 3H), 3.48 (s, 3H), 2.69 (dd,  $J = 15.4, 9.3$  Hz, 1H), 2.61 (d,  $J = 2.7$  Hz, 1H), 2.56 (s, 3H), 2.41 (d,  $J = 9.2$  Hz, 1H), 1.96 – 2.03 (m, 1H), 1.86 – 1.93 (m, 2H), 1.50 – 1.58 (m, 1H), 1.41 – 1.48 (m, 5H), 1.31

(dd,  $J = 12.2, 4.7$  Hz, 1H), 1.21 (td,  $J = 13.6, 13.0, 4.0$  Hz, 1H), 1.12 (td,  $J = 13.2, 3.7$  Hz, 1H), 0.91 (s, 3H), 0.90 (s, 3H), 0.88 (s, 3H).

$^{13}\text{C}$  NMR (151 MHz,  $\text{CDCl}_3$ ):  $\delta$  168.0, 157.7, 139.9, 135.7, 132.6, 130.1, 122.5, 122.4, 116.4, 94.2, 56.4, 54.1, 51.7, 50.4, 42.4, 39.7, 37.1, 33.4, 33.2, 26.0, 23.9, 22.7, 22.2, 22.1, 19.1, 14.1.

$[\alpha]_D^{24} = -26.13$  ( $c = 1.60$ ,  $\text{CHCl}_3$ ).

HRMS (ESI+): calculated for  $\text{C}_{26}\text{H}_{39}\text{O}_4$   $[\text{M}+\text{H}]^+$ : 415.2843, found 415.2841.

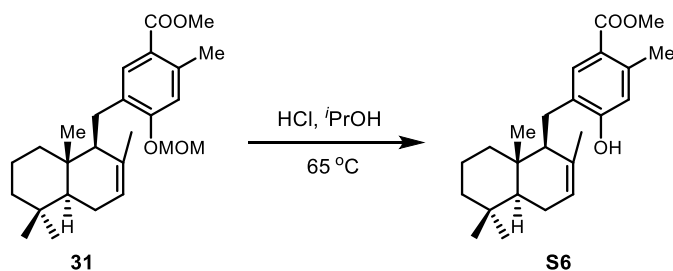

A solution of **31** (41.5 mg, 0.10 mmol, 1.0 equiv.) in *i*PrOH (2 mL) was treated with two drops of concentrated hydrochloric acid. The reaction mixture was stirred at 65 °C for 3 hours then quenched with  $\text{H}_2\text{O}$  (10 mL) and extracted with EtOAc (10 mL  $\times$  3). The combined organic extracts were washed with brine, dried over anhydrous  $\text{Na}_2\text{SO}_4$ , filtered, and concentrated in vacuo. The residue was purified by flash column chromatography (hexane/ethyl acetate = 5:1) to give **S6** (33.0 mg, 89% yield) as white solid.

$^1\text{H}$  NMR (400 MHz,  $\text{CDCl}_3$ ):  $\delta$  7.87 (s, 1H), 6.62 (s, 1H), 5.38 (m, 1H), 3.88 (s, 3H), 2.58 – 2.65 (m, 2H), 2.50 (s, 3H), 2.48 – 2.44 (m, 1H), 1.93 – 2.05 (m, 1H), 1.85 – 1.94 (m, 2H), 1.47 – 1.60 (m, 2H), 1.37 – 1.48 (m, 5H), 1.30 (dd,  $J = 12.0, 4.8$  Hz, 1H), 1.21 (dd,  $J = 13.6, 4.0$  Hz, 1H), 1.10 (dd,  $J = 13.2, 3.9$  Hz, 1H), 0.90 (s, 3H), 0.88 (s, 3H), 0.88 (s, 3H).

$^{13}\text{C}$  NMR (101 MHz,  $\text{CDCl}_3$ ):  $\delta$  168.6, 157.0, 140.0, 135.5, 133.2, 127.5, 122.5, 121.1, 118.4, 53.8, 51.9, 50.2, 42.3, 39.6, 37.0, 33.4, 33.2, 25.8, 23.9, 22.6, 22.1, 21.8, 19.1, 14.0.

$[\alpha]_D^{23} = +26.91$  ( $c = 1.60$ ,  $\text{CHCl}_3$ ).

HRMS (ESI+): calculated for  $\text{C}_{24}\text{H}_{33}\text{O}_3$   $[\text{M}-\text{H}]^-$ : 369.2424, found 369.2428.

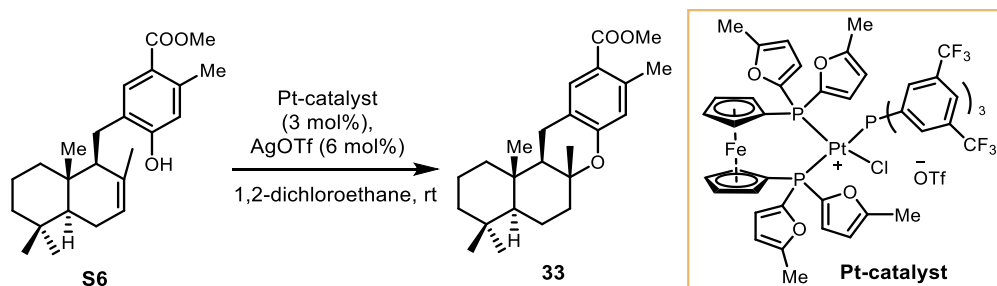

In an argon filled glovebox, to a 4 mL vial with a magnetic stir bar were added the Pt-catalyst<sup>1</sup> (4.9 mg, 3 mol%), silver trifluoromethanesulfonate (1.5 mg, 6 mol%), **S6** (37.1 mg, 0.1 mmol, 1.0 equiv.), and dichloroethane (1 mL). The resulting mixture was stirred at room temperature (23 °C) for 24 h. The reaction mixture was diluted with CH<sub>2</sub>Cl<sub>2</sub>, filtered through a pad of celite and concentrated. The residue was purified with silica gel chromatography (hexane/ethyl acetate = 10:1) to yield **33** (29.7 mg, 80% yield) as colorless oil.

**<sup>1</sup>H NMR (400 MHz, CDCl<sub>3</sub>):** δ 7.73 (s, 1H), 6.60 (s, 1H), 3.84 (s, 3H), 2.55 – 2.63 (m, 2H), 2.51 (s, 3H), 2.02 – 2.12 (m, 1H), 1.58 – 1.80 (m, 4H), 1.58 (s, 3H), 1.31 – 1.52 (m, 3H), 1.23 – 1.28 (m, 1H), 1.19 (s, 3H), 1.11 – 1.18 (m, 1H), 1.02 (dd, *J* = 12.3, 2.2 Hz, 1H), 0.96 (dd, *J* = 12.9, 3.8 Hz, 1H), 0.90 (s, 3H), 0.89 (s, 3H), 0.84 (s, 3H).

**<sup>13</sup>C NMR (151 MHz, CDCl<sub>3</sub>):** δ 167.9, 156.6, 140.5, 133.4, 120.7, 119.8, 119.7, 78.2, 56.2, 52.2, 51.6, 41.9, 41.2, 39.3, 37.0, 33.5, 33.3, 21.9, 21.8, 21.7, 21.1, 19.9, 18.7, 15.1.

[α]<sub>D</sub><sup>22</sup> = +77.92 (c = 1.25, CHCl<sub>3</sub>).

**HRMS (ESI+):** calculated for C<sub>24</sub>H<sub>35</sub>O<sub>3</sub> [M+H]<sup>+</sup>: 371.2581, found 371.2581.

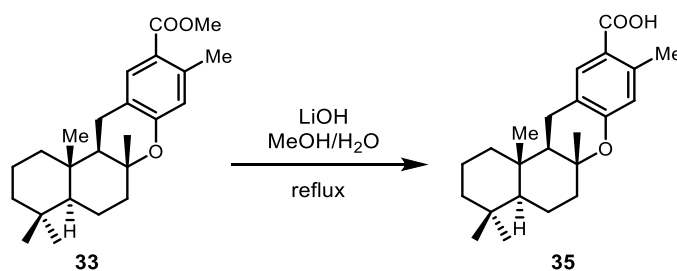

A solution of **33** (37.1 mg, 0.10 mmol, 1.0 equiv.) in MeOH/H<sub>2</sub>O (3 mL:0.6 mL) was treated with LiOH (24 mg, 1.00 mmol, 10 equiv.). The reaction mixture was stirred at 100 °C for 10 hours then quenched with 3 M HCl (10 mL) and extracted with EtOAc (10 mL × 3). The combined organic phase was washed with brine, dried over anhydrous Na<sub>2</sub>SO<sub>4</sub>, filtered, and concentrated in vacuo. The residue was purified by flash column

chromatography (hexane/ethyl acetate = 5:1, with 1% AcOH, v/v) to give **35** (33.1 mg, 93% yield) as white solid.

**<sup>1</sup>H NMR (600 MHz, CDCl<sub>3</sub>):** δ 7.85 (s, 1H), 6.62 (s, 1H), 2.65 (dd, *J* = 16.2, 5.3 Hz, 1H), 2.59 (dd, *J* = 16.4, 13.0 Hz, 1H), 2.55 (s, 3H), 2.08 (dt, *J* = 12.5, 3.2 Hz, 1H), 1.77 (dt, *J* = 13.7, 3.3 Hz, 1H), 1.67 – 1.73 (m, 1H), 1.57 – 1.63 (m, 2H), 1.45 – 1.51 (m, 1H), 1.40– 1.43 (m, 2H), 1.31 – 1.38 (m, 1H), 1.21 (s, 3H), 1.16 (dd, *J* = 13.6, 4.2 Hz, 1H), 1.03 (dd, *J* = 12.3, 2.2 Hz, 1H), 0.96 (td, *J* = 12.8, 3.9 Hz, 1H), 0.91 (s, 3H), 0.90 (s, 4H), 0.85 (s, 3H).

**<sup>13</sup>C NMR (151 MHz, CDCl<sub>3</sub>):** δ 172.9, 157.5, 141.6, 134.5, 120.0, 119.9, 119.5, 78.4, 56.2, 52.2, 41.9, 41.1, 39.3, 37.1, 33.5, 33.3, 22.3, 21.8, 21.7, 21.1, 19.9, 18.6, 15.1.

$[\alpha]_D^{22} = +79.60$  (c = 1.00, CHCl<sub>3</sub>).

**HRMS (ESI+):** calculated for C<sub>23</sub>H<sub>33</sub>O<sub>3</sub> [M+H]<sup>+</sup>: 357.2424, found 357.2422.

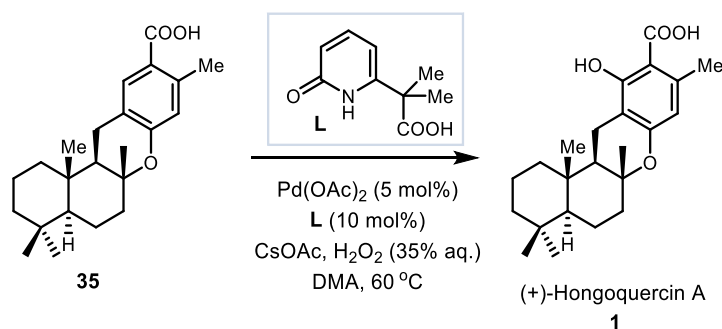

**L** was prepared according to literature procedure.<sup>10</sup>

Pd(OAc)<sub>2</sub> (1.1 mg, 0.005 mmol, 5 mol%), **L** (1.8 mg, 0.01 mmol, 10 mol%), **35** (35.7 mg, 0.1 mmol, 1.0 equiv.), and CsOAc (28.8 mg, 0.15 mmol, 1.5 equiv.) were weighed and placed in a reaction tube. Then, DMA (0.3 mL) was added and stirred for 10 min, followed by the addition of H<sub>2</sub>O<sub>2</sub> (35% aq., 30 uL, 3.0 equiv.). The vial was sealed with a screw cap and stirred at 60 °C for 24 h. Upon completion, the reaction was quenched with saturated solution of Na<sub>2</sub>SO<sub>3</sub> in water until H<sub>2</sub>O<sub>2</sub> was completely decomposed. (Tested by the potassium iodide starch test paper). The mixture was diluted with methanol and acidified with formic acid. The solution was filtered through a pad of Celite, and the aqueous layer was extracted with EtOAc (10 mL × 3). The combined organic layers were dried over anhydrous Na<sub>2</sub>SO<sub>4</sub> and concentrated under vacuum. The crude mixture was purified by flash chromatography (Hexane/EtOAc = 5:1, with 1% AcOH, v/v) to give **1** (24.2 mg, 65% yield) as white solid.

**<sup>1</sup>H NMR (600 MHz, CDCl<sub>3</sub>):** δ 11.83 (s, 1H), 6.21 (s, 1H), 2.68 (dd, *J* = 16.8, 4.9 Hz, 1H), 2.52 (s, 3H), 2.29 (dd, *J* = 16.8, 13.2 Hz, 1H), 2.03 – 2.11 (m, 1H), 1.79 – 1.84 (m, 1H), 1.74 – 1.79 (m, 1H), 1.67 – 1.71



(m, 1H), 1.62 – 1.66 (m, 1H), 1.55 (dd,  $J = 13.1, 5.0$  Hz, 1H), 1.45 – 1.50 (m, 1H), 1.39 – 1.43 (m, 1H), 1.35 – 1.39 (m, 1H), 1.20 (s, 3H), 1.13 – 1.20 (m, 1H), 1.03 (dd,  $J = 12.2, 2.2$  Hz, 1H), 0.95 – 1.01 (m, 1H), 0.92 (s, 3H), 0.91 (s, 3H), 0.85 (s, 3H).

$^{13}\text{C}$  NMR (151 MHz,  $\text{CDCl}_3$ ):  $\delta$  176.1, 164.0, 159.0, 141.6, 112.8, 108.2, 102.7, 78.6, 56.3, 51.7, 42.0, 41.0, 39.3, 37.1, 33.6, 33.4, 24.3, 21.7, 20.9, 19.9, 18.6, 16.8, 15.1.

$[\alpha]_D^{22} = +86.20$  ( $c = 0.50, \text{CHCl}_3$ ).

HRMS (ESI+): calculated for  $\text{C}_{23}\text{H}_{31}\text{O}_4$  [M-H] $^-$ : 371.2217, found 371.2218.

## 5.8 Synthesis of (+)-hongoquercin B

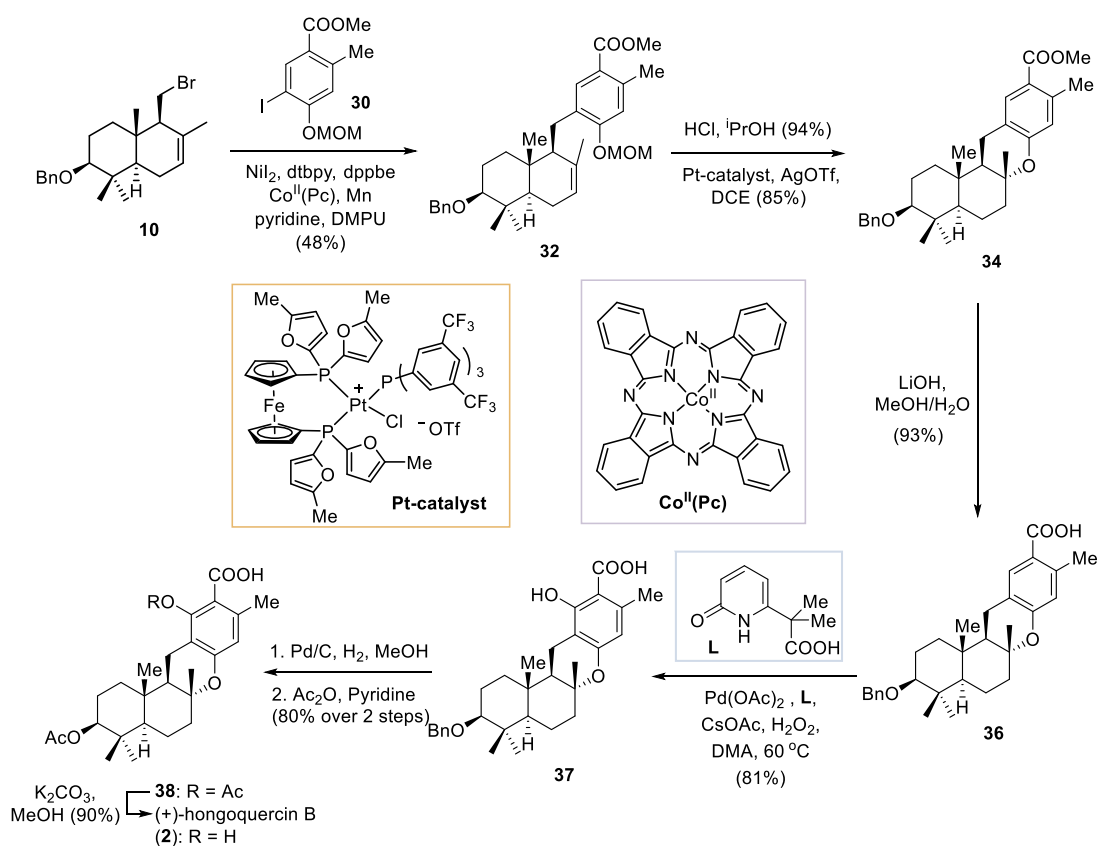

Figure S10. Synthetic route of (+)-hongoquercin B

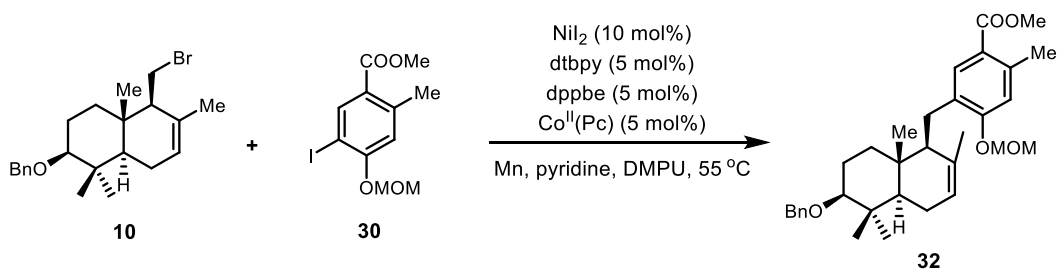

A solution of **10** (39.1 mg, 0.10 mmol, 1.0 equiv.) and **30** (33.6 mg, 0.10 mmol, 1.0 equiv.) in DMPU (0.3 mL) was treated with NiI<sub>2</sub> (3.1 mg, 0.01 mmol, 10 mol%), 1,2-bis(diphenylphosphino)benzene (2.2 mg, 0.005 mmol, 5 mol%), 4,4'-di-tert-butyl-2,2'-dipyridyl (1.3 mg, 0.005 mmol, 5 mol%), Co<sup>II</sup>(Pc) (2.9 mg, 0.005 mmol, 5 mol%), manganese powder (11.0 mg, 0.20 mmol, 2.0 equiv.), and pyridine (1 μL, 0.012 mmol, 12 mol%). The reaction mixture was heated to 55 °C for 16 hours then quenched with saturated aq. Na<sub>2</sub>S<sub>2</sub>O<sub>3</sub> solution (5 mL) and extracted with EtOAc (10 mL × 3). The combined organic extracts were washed with brine, dried over anhydrous Na<sub>2</sub>SO<sub>4</sub>, filtered, and concentrated in vacuo. The residue was purified by flash column chromatography (hexane/ethyl acetate = 10:1) to yield **32** (25.5 mg, 49% yield) as colorless oil.

**<sup>1</sup>H NMR (600 MHz, CDCl<sub>3</sub>):** δ 7.84 (s, 1H), 7.30 – 7.38 (m, 4H), 7.24 – 7.28 (m, 1H), 6.89 (s, 1H), 5.36 – 5.42 (m, 1H), 5.24 (s, 2H), 4.68 (d, *J* = 11.8 Hz, 1H), 4.45 (d, *J* = 11.8 Hz, 1H), 3.88 (s, 3H), 3.49 (s, 3H), 3.00 (dd, *J* = 11.7, 3.8 Hz, 1H), 2.73 (dd, *J* = 15.4, 9.1 Hz, 1H), 2.57 – 2.64 (m, 1H), 2.57 (s, 3H), 2.39 (d, *J* = 8.9 Hz, 1H), 1.98 – 2.01 (m, 2H), 1.95 (dt, *J* = 13.4, 3.5 Hz, 1H), 1.84 (dd, *J* = 13.2, 3.8 Hz, 1H), 1.55 (dd, *J* = 11.6, 2.8 Hz, 1H), 1.45 (s, 3H), 1.32 (dd, *J* = 9.5, 7.2 Hz, 1H), 1.20 (td, *J* = 13.6, 3.6 Hz, 1H), 1.01 (s, 3H), 0.95 (s, 3H), 0.93 (s, 3H).

**<sup>13</sup>C NMR (101 MHz, CDCl<sub>3</sub>):** δ 168.0, 157.7, 140.0, 139.6, 135.5, 132.5, 129.9, 128.3, 127.5, 127.4, 122.5, 122.4, 116.5, 94.3, 86.8, 71.5, 56.5, 53.9, 51.7, 50.3, 39.0, 37.7, 36.9, 28.4, 26.0, 23.5, 23.2, 22.5, 22.2, 16.4, 14.1.

[α]<sub>D</sub><sup>21</sup> = -8.51 (c = 1.75, CHCl<sub>3</sub>).

**HRMS (ESI+):** calculated for C<sub>33</sub>H<sub>44</sub>O<sub>5</sub>Na [M+Na]<sup>+</sup>: 543.3081, found 543.3080.

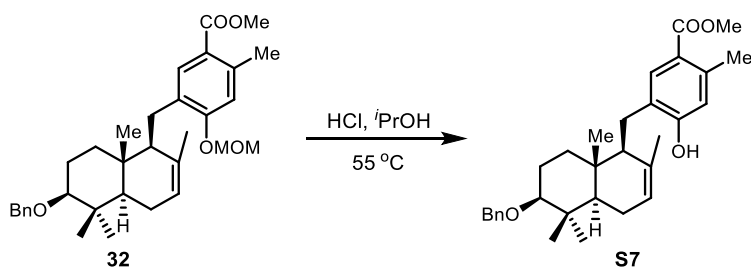

A solution of **32** (52.1 mg, 0.10 mmol, 1.0 equiv.) in *i*PrOH (2 mL) was treated with two drops of concentrated hydrochloric acid. The reaction mixture was stirred at 55 °C for 3 hours then quenched with H<sub>2</sub>O (10 mL) and extracted with EtOAc (10 mL × 3). The combined organic extracts were washed with brine, dried over anhydrous Na<sub>2</sub>SO<sub>4</sub>, filtered, and concentrated in vacuo. The residue was purified by flash column chromatography (hexane/ethyl acetate = 5:1) to give **S7** (44.8 mg, 94% yield) as white solid.

**<sup>1</sup>H NMR (600 MHz, CDCl<sub>3</sub>):** δ 7.85 (s, 1H), 7.30 – 7.39 (m, 4H), 7.20 – 7.29 (m, 1H), 6.56 (s, 1H), 5.38 – 5.42 (m, 1H), 5.36 (s, 1H), 4.68 (d, *J* = 11.8 Hz, 1H), 4.45 (d, *J* = 11.9 Hz, 1H), 3.87 (s, 3H), 3.00 (dd, *J* = 11.8, 3.8 Hz, 1H), 2.63 (d, *J* = 6.3 Hz, 3H), 2.52 (s, 3H), 2.36 – 2.43 (m, 1H), 1.91 – 2.03 (m, 3H), 1.84 (dd, *J* = 13.2, 3.7 Hz, 1H), 1.53 – 1.59 (m, 1H), 1.46 (s, 3H), 1.32 (dd, *J* = 9.7, 7.0 Hz, 2H), 1.21 (td, *J* = 13.6, 3.5 Hz, 1H), 1.01 (s, 3H), 0.95 (s, 3H), 0.92 (s, 3H).

**<sup>13</sup>C NMR (151 MHz, CDCl<sub>3</sub>):** δ 168.1, 156.4, 140.1, 139.6, 135.2, 133.3, 128.4, 127.6, 127.4, 127.1, 122.7, 121.8, 118.4, 86.8, 71.6, 53.7, 51.8, 50.3, 39.0, 37.7, 36.9, 28.4, 25.9, 23.5, 23.2, 22.5, 21.8, 16.4, 14.1.

$[\alpha]_D^{22} = -12.24$  (*c* = 1.25, CHCl<sub>3</sub>).

**HRMS (ESI<sup>+</sup>):** calculated for C<sub>31</sub>H<sub>40</sub>O<sub>4</sub>Na [M+Na]<sup>+</sup>: 499.2819, found 499.2819.

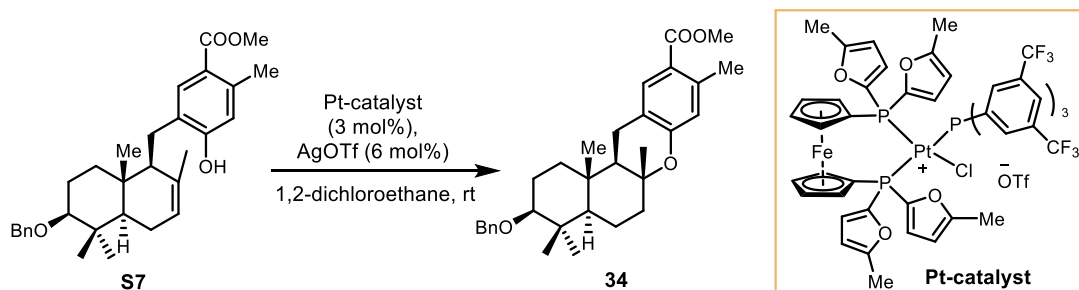

In an argon filled glovebox, to a 4 mL vial with a magnetic stir bar were added the Pt-catalyst<sup>1</sup> (4.9 mg, 3 mol%), silver trifluoromethanesulfonate (1.5 mg, 6 mol%), **S7** (47.7 mg, 0.1 mmol, 1.0 equiv.), and ClCH<sub>2</sub>CH<sub>2</sub>Cl (1 mL). Then the vial was taken outside of the glovebox and the resulting mixture was stirred at room temperature (23 °C) for 12 h. The reaction mixture was diluted with CH<sub>2</sub>Cl<sub>2</sub>, filtered through a pad of celite and concentrated. The residue was purified with silica gel chromatography (hexane/ethyl acetate = 10:1) to yield **34** (40.5 mg, 85% yield) as colorless oil.

**<sup>1</sup>H NMR (600 MHz, CDCl<sub>3</sub>):** δ 7.73 (s, 1H), 7.30 – 7.40 (m, 4H), 7.24 – 7.30 (m, 1H), 6.61 (s, 1H), 4.68 (d, *J* = 11.8 Hz, 1H), 4.44 (d, *J* = 11.8 Hz, 1H), 3.84 (s, 3H), 2.95 (dd, *J* = 11.8, 4.3 Hz, 1H), 2.58 – 2.63 (m, 2H), 2.52 (s, 3H), 2.09 (dt, *J* = 12.5, 3.2 Hz, 1H), 1.89 (dd, *J* = 13.5, 4.0 Hz, 1H), 1.78 (t, *J* = 3.6 Hz, 1H), 1.76 (t, *J* = 3.5 Hz, 1H), 1.64 – 1.69 (m, 1H), 1.59 – 1.61 (m, 1H), 1.53 – 1.57 (m, 1H), 1.38 – 1.47 (m, 1H), 1.20 (s, 3H), 1.03 (s, 3H), 1.00 – 1.02 (m, 1H), 0.92 (s, 3H), 0.87 (s, 3H).

**<sup>13</sup>C NMR (151 MHz, CDCl<sub>3</sub>):** δ 167.9, 156.6, 140.5, 139.4, 133.4, 128.4, 127.6, 127.4, 120.8, 119.9, 119.4, 86.3, 78.0, 71.7, 55.7, 52.1, 51.6, 41.1, 39.1, 37.5, 36.8, 28.5, 22.9, 21.9, 21.0, 19.5, 16.7, 15.2.

$[\alpha]_D^{22} = +101.22$  (*c* = 0.90, CHCl<sub>3</sub>).

**HRMS (ESI+):** calculated for C<sub>31</sub>H<sub>41</sub>O<sub>4</sub> [M+H]<sup>+</sup>: 477.2999, found 477.2998.

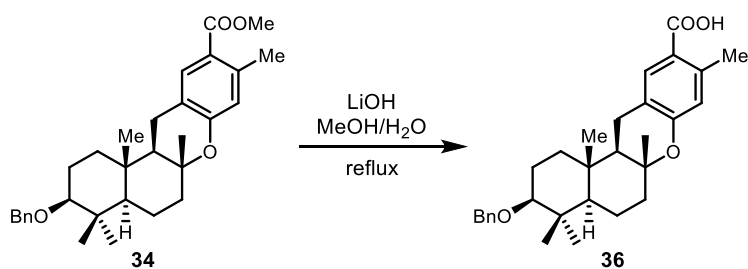

A solution of **34** (47.7 mg, 0.10 mmol, 1.0 equiv.) in MeOH/H<sub>2</sub>O (3 mL:0.6 mL) was treated with LiOH (24 mg, 1.00 mmol, 10 equiv.). The reaction mixture was stirred at 100 °C for 10 hours then quenched with 3 M HCl (10 mL) and extracted with EtOAc (10 mL × 3). The combined organic extracts were washed with brine, dried over anhydrous Na<sub>2</sub>SO<sub>4</sub>, filtered, and concentrated in vacuo. The residue was purified by flash column chromatography (hexane/ethyl acetate = 5:1, with 1% AcOH, v/v) to give **36** (43.1 mg, 93% yield) as white solid.

**<sup>1</sup>H NMR (400 MHz, CDCl<sub>3</sub>):** δ 7.86 (s, 1H), 7.29 – 7.40 (m, 4H), 7.23 – 7.31 (m, 1H), 6.63 (s, 1H), 4.68 (d, *J* = 11.8 Hz, 1H), 4.44 (d, *J* = 11.8 Hz, 1H), 2.96 (dd, *J* = 11.7, 4.3 Hz, 1H), 2.58 – 2.67 (m, 2H), 2.56 (s, 3H), 2.05 – 2.14 (m, 1H), 1.90 (dd, *J* = 13.5, 3.9 Hz, 1H), 1.78 (dd, *J* = 13.1, 3.5 Hz, 2H), 1.59 – 1.74 (m, 2H), 1.51 – 1.61 (m, 1H), 1.39 – 1.48 (m, 1H), 1.21 (s, 3H), 1.04 (s, 3H), 0.98 – 1.03 (m, 2H), 0.92 (s, 3H), 0.88 (s, 3H).

**<sup>13</sup>C NMR (101 MHz, CDCl<sub>3</sub>):** δ 172.8, 157.4, 141.7, 139.4, 134.5, 128.4, 127.6, 127.4, 120.0, 119.6, 119.6, 86.2, 78.2, 71.7, 55.6, 52.0, 41.1, 39.1, 37.5, 36.8, 28.4, 22.9, 22.3, 21.9, 21.1, 19.5, 16.7, 15.2.

[α]<sub>D</sub><sup>23</sup> = +122.80 (c = 0.75, CHCl<sub>3</sub>).

**HRMS (ESI+):** calculated for C<sub>30</sub>H<sub>38</sub>O<sub>4</sub>Na [M+Na]<sup>+</sup>: 485.2662, found 485.2664.

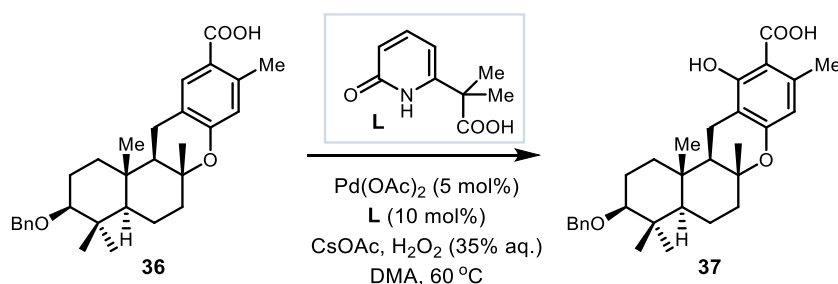

**L** was prepared according to literature procedure.<sup>8</sup>

Pd(OAc)<sub>2</sub> (1.1 mg, 0.005 mmol, 5 mol%), **L** (1.8 mg, 0.01 mmol, 10 mol%), **36** (46.3 mg, 0.1 mmol, 1.0 equiv.), and CsOAc (28.8 mg, 0.15 mmol, 1.5 equiv.) were weighed and placed in a reaction tube. Then, DMA (0.3 mL) was added and stirred for 10 min, followed by the addition of H<sub>2</sub>O<sub>2</sub> (35% aq., 30 uL, 3.0

equiv.). The vial was sealed with a screw cap and stirred at 60 °C for 24 h. Upon completion, the reaction was quenched with saturated solution of Na<sub>2</sub>SO<sub>3</sub> in water until H<sub>2</sub>O<sub>2</sub> was completely decomposed. (Tested by the potassium iodide starch test paper). The mixture was diluted with methanol and acidified with formic acid. The solution was filtered through a pad of Celite, and the aqueous layer was extracted with EtOAc (10 mL × 3). The combined organic layers were dried over anhydrous Na<sub>2</sub>SO<sub>4</sub> and concentrated under vacuum. The crude mixture was purified by flash chromatography (Hexane/EtOAc = 5:1, with 1% AcOH, v/v) to give **37** (38.8 mg, 81% yield) as white solid.

**<sup>1</sup>H NMR (600 MHz, CDCl<sub>3</sub>):** δ 11.85 (s, 1H), 7.31 – 7.40 (m, 4H), 7.24 – 7.30 (m, 1H), 6.21 (s, 1H), 4.69 (d, *J* = 11.8 Hz, 1H), 4.44 (d, *J* = 11.9 Hz, 1H), 2.96 (dd, *J* = 11.7, 4.1 Hz, 1H), 2.67 (dd, *J* = 16.7, 4.9 Hz, 1H), 2.52 (s, 3H), 2.31 (dd, *J* = 16.7, 13.2 Hz, 1H), 2.09 (dt, *J* = 12.3, 3.2 Hz, 1H), 1.85 – 1.93 (m, 2H), 1.74 – 1.82 (m, 1H), 1.62 – 1.71 (m, 1H), 1.55 – 1.64 (m, 1H), 1.51 (dd, *J* = 13.1, 4.9 Hz, 1H), 1.39 – 1.49 (m, 1H), 1.21 (s, 3H), 0.99 – 1.08 (m, 5H), 0.95 (s, 3H), 0.88 (s, 3H).

**<sup>13</sup>C NMR (151 MHz, CDCl<sub>3</sub>):** δ 176.4, 164.0, 158.9, 141.7, 139.4, 128.4, 127.6, 127.4, 112.8, 108.0, 102.8, 86.3, 78.4, 71.6, 55.8, 51.5, 41.0, 39.1, 37.5, 36.9, 28.5, 24.3, 22.9, 20.8, 19.5, 16.9, 16.7, 15.1.

[α]<sub>D</sub><sup>25</sup> = +143.20 (c = 1.00, CHCl<sub>3</sub>).

**HRMS (ESI+):** calculated for C<sub>30</sub>H<sub>37</sub>O<sub>5</sub> [M-H]<sup>-</sup>: 477.2636, found 477.2634.

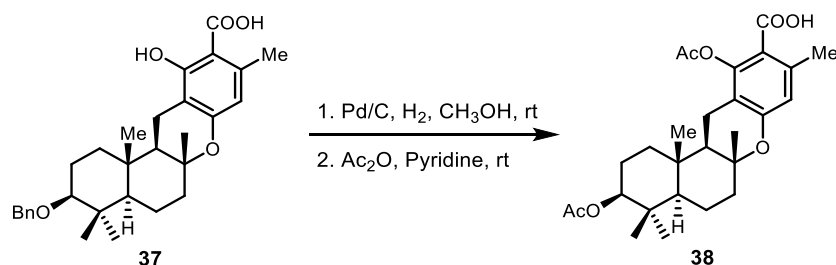

A solution of **37** (47.9 mg, 0.10 mmol, 1.0 equiv.) in MeOH (2 mL) was treated with Pd (10% on carbon, 32 mg, 0.03 mmol, 0.3 equiv.). The reaction mixture was stirred at 23 °C in hydrogen (1 atm) for 5 hours then filtered, and concentrated in vacuo. Acetic anhydride (47 μL, 0.50 mmol, 5.0 equiv.) was added to a magnetically stirred solution of the crude residue in pyridine (0.5 mL) at room temperature. The mixture was stirred for 24 h, then the resulting solution was diluted with water (5 mL), and the mixture was extracted with CH<sub>2</sub>Cl<sub>2</sub> (5 mL × 3). The organic phase was washed with HCl (1 N aq.), sat. CuSO<sub>4</sub> solution, water, and brine, dried with Na<sub>2</sub>SO<sub>4</sub>, and concentrated under reduced pressure. The residue was purified by flash column chromatography (Hexane/EtOAc = 5:1, with 1% AcOH, v/v) to give **38** (38.3 mg, 80% yield) as

colorless oil.

**<sup>1</sup>H NMR (600 MHz, CDCl<sub>3</sub>):** δ. 6.57 (s, 1H), 4.50 (dd, *J* = 11.6, 4.5 Hz, 1H), 2.45 – 2.52 (m, 1H), 2.43 (s, 3H), 2.30 (s, 3H), 2.21 – 2.29 (m, 1H), 2.06 (s, 3H), 1.95 – 2.04 (m, 1H), 1.69 – 1.80 (m, 3H), 1.60 – 1.68 (m, 2H), 1.54 (dd, *J* = 13.1, 5.0 Hz, 1H), 1.38 – 1.47 (m, 1H), 1.18 (s, 3H), 1.13 – 1.17 (m, 1H), 1.09 (dd, *J* = 12.1, 2.2 Hz, 1H), 0.91 (s, 3H), 0.91 (s, 3H), 0.89 (s, 3H).

**<sup>13</sup>C NMR (151 MHz, CDCl<sub>3</sub>):** δ 171.2, 171.1, 169.2, 156.4, 149.8, 139.2, 117.4, 115.6, 114.2, 80.4, 77.8, 55.2, 51.2, 40.7, 37.9, 37.2, 36.7, 28.2, 23.6, 21.5, 21.4, 21.0, 20.8, 19.4, 17.3, 16.8, 15.1.

$[\alpha]_D^{24} = +136.83$  (c = 0.60, CHCl<sub>3</sub>).

**HRMS (ESI+):** calculated for C<sub>27</sub>H<sub>36</sub>O<sub>7</sub>Na [M+Na]<sup>+</sup>: 495.2353, found 495.2353.

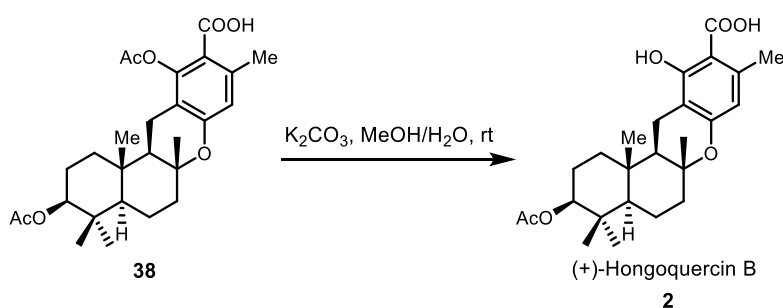

**38** (20 mg, 0.042 mmol, 1.0 equiv.) was dissolved in methanol (1 mL) and water (0.1 mL), and then K<sub>2</sub>CO<sub>3</sub> (17.5 mg, 0.127 mmol, 3.0 equiv.) was added at room temperature. The mixture was stirred for 5 h at room temperature, then the resulting mixture was acidified by 2 N HCl to pH 2–3, and extracted with EtOAc (10 mL × 3). The extract was washed with water and brine, and dried with sodium sulfate. The solvent was evaporated, and the residue was purified by silica gel column chromatography (Hexane/Et<sub>2</sub>O = 5:1, with 1% AcOH, v/v) to give **2** (16.3mg, 90 % yield) as a white solid.

**<sup>1</sup>H NMR (400 MHz, CDCl<sub>3</sub>):** δ 11.88 (s, 1H), 6.21 (s, 1H), 4.52 (dd, *J* = 11.5, 4.9 Hz, 1H), 2.66 (dd, *J* = 16.8, 5.0 Hz, 1H), 2.51 (s, 3H), 2.30 (dd, *J* = 17.0, 13.2 Hz, 1H), 2.05 – 2.14 (m, 1H), 2.07 (s, 3H), 1.86 (dt, *J* = 13.1, 3.6 Hz, 1H), 1.60 – 1.80 (m, 4H), 1.53 (dd, *J* = 13.1, 5.0 Hz, 1H), 1.43 – 1.49 (m, 1H), 1.20 (s, 3H), 1.12 – 1.21 (m, 1H), 1.10 (dd, *J* = 12.0, 2.1 Hz, 1H), 0.95 (s, 3H), 0.91 (s, 3H), 0.89 (s, 3H).

**<sup>13</sup>C NMR (151 MHz, CDCl<sub>3</sub>):** δ 175.7, 171.2, 164.0, 158.8, 141.7, 112.7, 107.9, 102.8, 80.6, 78.1, 55.3, 51.4, 40.8, 37.9, 37.3, 36.8, 28.3, 27.1, 24.3, 23.7, 21.4, 20.8, 19.5, 16.9, 16.8, 15.2.

$[\alpha]_D^{24} = +89.00$  (c = 0.30, CHCl<sub>3</sub>).

**HRMS (ESI+):** calculated for C<sub>25</sub>H<sub>33</sub>O<sub>6</sub> [M-H]<sup>-</sup>: 429.2272, found 429.2276.

## 6. NMR comparisons

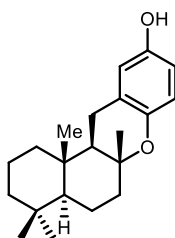

(+)-*ent*-chromazonarol

### <sup>1</sup>H NMR<sup>11</sup>

| Literature (500 MHz in CDCl <sub>3</sub> ) | Synthetic (400 MHz in CDCl <sub>3</sub> ) |
|--------------------------------------------|-------------------------------------------|
| 6.63 (d, $J = 8.3$ Hz, 1 H)                | 6.63 (d, $J = 8.4$ Hz, 1 H)               |
| 6.53 – 6.59 (m, 2 H)                       | 6.52 – 6.59 (m, 2 H)                      |
| 4.72 (s, 1H, OH)                           | 4.33 (br, 1H, OH)                         |
| 2.54 – 2.58 (m, 2 H)                       | 2.54 – 2.60 (m, 2 H)                      |
| 2.04 (dt, $J = 12.5, 3.2$ Hz, 1 H)         | 2.04 (dt, $J = 12.5, 3.2$ Hz, 1 H)        |
| 1.78 (m, 1 H)                              | 1.72 - 1.78 (m, 1 H)                      |
| 1.71 – 1.58 (m, 4 H)                       | 1.61 – 1.71 (m, 4 H)                      |
| 1.31 – 1.51 (m, 3 H)                       | 1.36 – 1.50 (m, 3 H)                      |
| 1.13 – 1.22 (m, 4 H)                       | 1.15 – 1.21 (m, 4 H)                      |
| 1.02 (dd, $J = 12.3, 2.3$ Hz, 1 H)         | 1.02 (dd, $J = 12.2, 2.3$ Hz, 1 H)        |
| 0.92 – 0.99 (m, 1 H)                       | 0.94 – 0.98 (m, 1 H)                      |
| 0.90 (s, 3 H)                              | 0.90 (s, 3 H)                             |
| 0.88 (s, 3 H)                              | 0.88 (s, 3 H)                             |
| 0.84 (s, 3 H)                              | 0.84 (s, 3 H)                             |

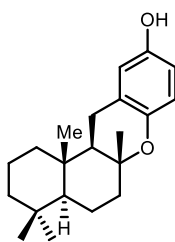

(+)-*ent*-chromazonarol

<sup>13</sup>C NMR<sup>11</sup>

| Literature (125 MHz in CDCl <sub>3</sub> ) | Synthetic (151 MHz in CDCl <sub>3</sub> ) |
|--------------------------------------------|-------------------------------------------|
| 148.7                                      | 148.6                                     |
| 147.2                                      | 147.3                                     |
| 123.4                                      | 123.4                                     |
| 117.6                                      | 117.7                                     |
| 115.9                                      | 115.9                                     |
| 114.4                                      | 114.4                                     |
| 76.9                                       | 76.8                                      |
| 56.2                                       | 56.3                                      |
| 52.2                                       | 52.2                                      |
| 42.0                                       | 42.0                                      |
| 41.2                                       | 41.3                                      |
| 39.3                                       | 39.4                                      |
| 36.9                                       | 36.9                                      |
| 33.6                                       | 33.6                                      |
| 33.3                                       | 33.3                                      |
| 22.6                                       | 22.6                                      |
| 21.7                                       | 21.8                                      |
| 20.8                                       | 20.8                                      |
| 19.9                                       | 19.9                                      |
| 18.7                                       | 18.7                                      |
| 14.9                                       | 15.0                                      |



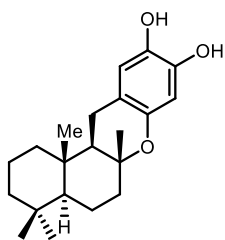

(+)-8-*epi*-puupehenol

<sup>1</sup>H NMR<sup>12</sup>

| Literature (300 MHz in Acetone- <i>d</i> <sub>6</sub> ) | Synthetic (400 MHz in Acetone- <i>d</i> <sub>6</sub> ) |
|---------------------------------------------------------|--------------------------------------------------------|
| 7.60 (bs, 1 H)                                          | 7.61 (s, 1 H)                                          |
| 7.20 (bs, 1 H)                                          | 7.20 (s, 1 H)                                          |
| 6.49 (s, 1 H)                                           | 6.50 (s, 1 H)                                          |
| 6.18 (s, 1 H)                                           | 6.19 (s, 1 H)                                          |
| 2.47 (d, <i>J</i> = 2.0 Hz, 1 H)                        | 2.40 – 2.51 (m, 2 H)                                   |
| 2.44 (s, 1 H)                                           |                                                        |
| 1.95 (dt, <i>J</i> = 12.2, 2.9 Hz, 1 H)                 | 1.96 (dt, <i>J</i> = 12.5, 3.2 Hz, 1 H),               |
| 1.25 (s, 3 H)                                           | 1.64 – 1.76 (m, 3 H)                                   |
| 0.89 (s, 3 H)                                           | 1.59 (dd, <i>J</i> = 13.0, 4.4 Hz, 1 H)                |
| 0.89 (s, 6 H)                                           | 1.53 (dd, <i>J</i> = 11.4, 7.0 Hz, 1 H)                |
|                                                         | 1.43 – 1.47 (m, 1 H)                                   |
|                                                         | 1.38 – 1.42 (m, 2 H)                                   |
|                                                         | 1.18 – 1.23 (m, 1 H)                                   |
|                                                         | 1.13 (s, 3 H)                                          |
|                                                         | 1.06 (dd, <i>J</i> = 12.4, 2.5 Hz, 1 H)                |
|                                                         | 0.98 – 1.02 (m, 1 H)                                   |
|                                                         | 0.90 (s, 6 H)                                          |
|                                                         | 0.86 (s, 3 H)                                          |

Note: References for solvent peaks were not listed in all literature reports, which could be responsible for slight variations in chemical shifts. Also, complete peak listings were not always reported.

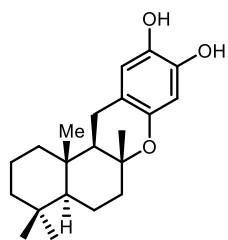

**(+)-8-*epi*-puupehenol**

**<sup>13</sup>C NMR<sup>12</sup>**

| Literature (75 MHz in Acetone- <i>d</i> <sub>6</sub> ) | Synthetic (151 MHz in Acetone- <i>d</i> <sub>6</sub> ) |
|--------------------------------------------------------|--------------------------------------------------------|
| 147.0                                                  | 146.2                                                  |
| 144.8                                                  | 144.0                                                  |
| 139.2                                                  | 138.4                                                  |
| 116.2                                                  | 115.2                                                  |
| 115.2                                                  | 112.4                                                  |
| 104.5                                                  | 103.7                                                  |
| 76.5                                                   | 75.7                                                   |
| 56.8                                                   | 56.1                                                   |
| 53.4                                                   | 52.6                                                   |
| 42.5                                                   | 41.7                                                   |
| 41.9                                                   | 41.2                                                   |
| 39.8                                                   | 39.0                                                   |
| 37.4                                                   | 36.6                                                   |
| 34.0                                                   | 32.9                                                   |
| 33.7                                                   | 32.9                                                   |
| 22.3                                                   | 21.5                                                   |
| 21.9                                                   | 21.1                                                   |
| 21.3                                                   | 20.1                                                   |
| 21.0                                                   | 19.5                                                   |
| 19.2                                                   | 18.3                                                   |
| 15.2                                                   | 14.3                                                   |

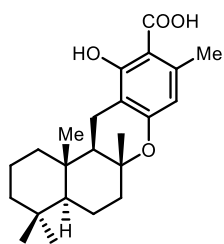

(+)-Hongoquercin A

<sup>1</sup>H NMR<sup>13</sup>

| Literature (500 MHz in CDCl <sub>3</sub> )     | Synthetic (600 MHz in CDCl <sub>3</sub> ) |
|------------------------------------------------|-------------------------------------------|
| 11.81 (s, 1 H)                                 | 11.83 (s, 1 H)                            |
| 6.21 (s, 1 H)                                  | 6.21 (s, 1 H)                             |
| 2.69 (dd, <i>J</i> = 16.8, 4.8 Hz, 1 H)        | 2.68 (dd, <i>J</i> = 16.8, 4.9 Hz, 1 H)   |
| 2.52 (s, 3 H)                                  | 2.52 (s, 3 H)                             |
| 2.28 (dd, <i>J</i> = 16.6, 13.3 Hz, 1 H)       | 2.29 (dd, <i>J</i> = 16.8, 13.2 Hz, 1 H)  |
| 2.07 (ddd, <i>J</i> = 12.5, 3.0, 3.0 Hz, 1 H)  | 2.03 – 2.11 (m, 1 H)                      |
| 1.78 (m, 1 H)                                  | 1.79 – 1.84 (m, 1 H)                      |
| 1.81 (m, 1 H)                                  | 1.74 – 1.79 (m, 1 H)                      |
| 1.67 (ddd, <i>J</i> = 13.2, 13.2, 4.1 Hz, 1 H) | 1.67 – 1.71 (m, 1 H)                      |
| 1.62 (m, 1 H)                                  | 1.62 – 1.66 (m, 1 H)                      |
| 1.55 (dd, <i>J</i> = 13.2, 4.9 Hz, 1 H)        | 1.55 (dd, <i>J</i> = 13.1, 5.0 Hz, 1 H)   |
| 1.49 (m, 1 H)                                  | 1.45 – 1.50 (m, 1 H)                      |
| 1.42 (d, <i>J</i> = 12.4, 1 H)                 | 1.39 – 1.43 (m, 1 H)                      |
| 1.36 (ddd, <i>J</i> = 13.7, 13.7, 3.2 Hz, 1 H) | 1.35 – 1.39 (m, 1 H)                      |
| 1.20 (s, 3 H)                                  | 1.20 (s, 3 H)                             |
| 1.17 (ddd, <i>J</i> = 13.5, 13.5, 3.7 Hz, 1 H) | 1.13 – 1.20 (m, 1 H)                      |
| 1.03 (dd, <i>J</i> = 12.2, 1.4 Hz, 1 H)        | 1.03 (dd, <i>J</i> = 12.2, 2.2 Hz, 1 H)   |
| 0.97 (ddd, <i>J</i> = 13.5, 3.1 Hz, 1 H)       | 0.95 – 1.01 (m, 1 H)                      |
| 0.92 (s, 3 H)                                  | 0.92 (s, 3 H)                             |
| 0.91 (s, 3 H)                                  | 0.91 (s, 3 H)                             |
| 0.85 (s, 3 H)                                  | 0.85 (s, 3 H)                             |

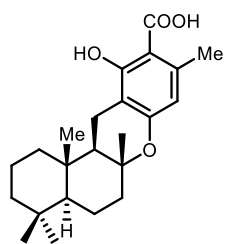

(+)-Hongoquercin A

$^{13}\text{C}$  NMR<sup>13</sup>

| Literature (100 MHz in $\text{CDCl}_3$ ) | Synthetic (151 MHz in $\text{CDCl}_3$ ) |
|------------------------------------------|-----------------------------------------|
| 176.3                                    | 176.1                                   |
| 164.1                                    | 164.0                                   |
| 159.1                                    | 159.0                                   |
| 141.7                                    | 141.6                                   |
| 112.9                                    | 112.8                                   |
| 108.3                                    | 108.2                                   |
| 102.7                                    | 102.7                                   |
| 78.7                                     | 78.6                                    |
| 56.4                                     | 56.3                                    |
| 51.8                                     | 51.7                                    |
| 42.1                                     | 42.0                                    |
| 41.1                                     | 41.0                                    |
| 39.4                                     | 39.3                                    |
| 37.2                                     | 37.1                                    |
| 33.7                                     | 33.6                                    |
| 33.4                                     | 33.4                                    |
| 24.4                                     | 24.3                                    |
| 21.8                                     | 21.7                                    |
| 21.0                                     | 20.9                                    |
| 20.0                                     | 19.9                                    |
| 18.7                                     | 18.6                                    |
| 16.9                                     | 16.8                                    |
| 15.2                                     | 15.1                                    |

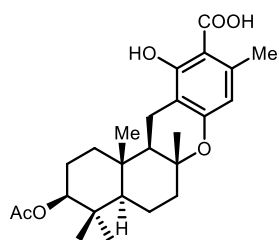

(+)-Hongoquercin B

<sup>1</sup>H NMR<sup>14</sup>

| Literature (500 MHz in CDCl <sub>3</sub> )     | Synthetic (400 MHz in CDCl <sub>3</sub> ) |
|------------------------------------------------|-------------------------------------------|
| 11.85 (s, 1 H)                                 | 11.88 (s, 1 H)                            |
| 6.21 (s, 1 H)                                  | 6.21 (s, 1 H)                             |
| 4.52 (dd, <i>J</i> = 11.6, 4.9 Hz, 1 H)        | 4.52 (dd, <i>J</i> = 11.5, 4.9 Hz, 1 H)   |
| 2.67 (dd, <i>J</i> = 16.8, 4.9 Hz, 1 H)        | 2.66 (dd, <i>J</i> = 16.8, 5.0 Hz, 1 H)   |
| 2.52 (s, 3 H)                                  | 2.51 (s, 3 H)                             |
| 2.31 (dd, <i>J</i> = 16.8, 13.1 Hz, 1 H)       | 2.30 (dd, <i>J</i> = 17.0, 13.2 Hz, 1 H)  |
| 2.08 (ddd, <i>J</i> = 12.5, 3.1, 1 H)          | 2.05 – 2.14 (m, 1 H)                      |
| 2.07 (s, 3 H)                                  | 2.07 (s, 3 H)                             |
| 1.86 (ddd, <i>J</i> = 13.2, 3.4, 3.4 Hz, 1 H)  | 1.86 (dt, <i>J</i> = 13.1, 3.6 Hz, 1 H)   |
| 1.64 – 1.80 (m, 4 H)                           | 1.60 – 1.80 (m, 4 H)                      |
| 1.53 (dd, <i>J</i> = 13.1, 4.9 Hz, 1 H)        | 1.53 (dd, <i>J</i> = 13.1, 5.0 Hz, 1 H)   |
| 1.44 (m, 1 H)                                  | 1.43 – 1.49 (m, 1 H)                      |
| 1.20 (s, 3 H)                                  | 1.20 (s, 3 H)                             |
| 1.19 (ddd, <i>J</i> = 13.2, 13.2, 3.7 Hz, 1 H) | 1.12 – 1.21 (m, 1 H)                      |
| 1.10 (dd, <i>J</i> = 12.2, 1.8 Hz, 1 H)        | 1.10 (dd, <i>J</i> = 12.0, 2.1 Hz, 1 H)   |
| 0.96 (s, 3 H)                                  | 0.95 (s, 3 H)                             |
| 0.91 (s, 3 H)                                  | 0.91 (s, 3 H)                             |
| 0.90 (s, 3 H)                                  | 0.89 (s, 3 H)                             |

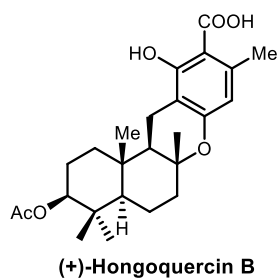

**<sup>13</sup>C NMR<sup>14</sup>**

| Literature (75 MHz in CDCl <sub>3</sub> ) | Synthetic (151 MHz in CDCl <sub>3</sub> ) |
|-------------------------------------------|-------------------------------------------|
| 176.1                                     | 175.7                                     |
| 171.1                                     | 171.2                                     |
| 163.8                                     | 164.0                                     |
| 158.5                                     | 158.8                                     |
| 141.5                                     | 141.7                                     |
| 112.6                                     | 112.7                                     |
| 107.7                                     | 107.9                                     |
| 102.9                                     | 102.8                                     |
| 80.6                                      | 80.6                                      |
| 77.9                                      | 78.1                                      |
| 55.1                                      | 55.3                                      |
| 51.2                                      | 51.4                                      |
| 40.6                                      | 40.8                                      |
| 37.7                                      | 37.9                                      |
| 37.1                                      | 37.3                                      |
| 36.6                                      | 36.8                                      |
| 28.0                                      | 28.3                                      |
| 24.1                                      | 24.3                                      |
| 23.5                                      | 23.7                                      |
| 21.3                                      | 21.4                                      |
| 20.6                                      | 20.8                                      |
| 19.3                                      | 19.5                                      |
| 16.8                                      | 16.9                                      |
| 16.6                                      | 16.8                                      |
| 15.0                                      | 15.2                                      |

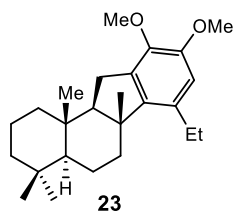

**<sup>1</sup>H NMR<sup>8</sup>**

| Literature (400 MHz in CDCl <sub>3</sub> ) | Synthetic (400 MHz in CDCl <sub>3</sub> ) |
|--------------------------------------------|-------------------------------------------|
| 6.49 (s, 1H)                               | 6.51 (s, 1H)                              |
| 3.81 (s, 3H)                               | 3.83 (s, 3H)                              |
| 3.80 (s, 3H)                               | 3.82 (s, 3H)                              |
| 2.69 (m, 2H)                               | 2.73 (dd, <i>J</i> = 6.8, 4.6 Hz, 1H)     |
|                                            | 2.69 (dd, <i>J</i> = 6.8, 4.4 Hz, 1H)     |
| 2.56 (dd, <i>J</i> = 14.5, 7.5 Hz, 1H)     | 2.56 – 2.63 (m, 1H)                       |
| 2.49 (dd, <i>J</i> = 14.5, 13.0 Hz, 1H)    | 2.51 (dd, <i>J</i> = 14.8, 12.8 Hz, 1H)   |
| 2.36 (dt, <i>J</i> = 12.0, 3.4 Hz, 1H)     | 2.38 (dt, <i>J</i> = 12.0, 3.2 Hz, 1H)    |
|                                            | 1.80 (dd, <i>J</i> = 12.6, 3.9 Hz, 1H)    |
|                                            | 1.68 – 1.76 (m, 3H)                       |
|                                            | 1.54 – 1.60 (m, 2H)                       |
|                                            | 1.37 – 1.46 (m, 2H)                       |
| 1.22 (t, <i>J</i> = 7.6 Hz, 3H)            | 1.24 (t, <i>J</i> = 7.6 Hz, 3H)           |
|                                            | 1.17 (dd, <i>J</i> = 13.1, 4.2 Hz, 1H)    |
| 1.08 (s, 3H)                               | 1.11 (s, 3H)                              |
| 1.02 (s, 3H)                               | 1.04 (s, 3H)                              |
|                                            | 0.95 – 1.02 (m, 2H)                       |
| 0.85 (s, 6H)                               | 0.88 (s, 6H)                              |

Note: References for solvent peaks were not listed in all literature reports, which could be responsible for slight variations in chemical shifts. Also, complete peak listings were not always reported

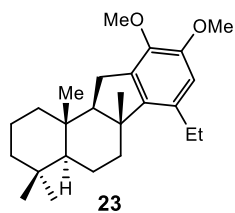

<sup>13</sup>C NMR<sup>8</sup>

| Literature (75 MHz in CDCl <sub>3</sub> ) | Synthetic (101 MHz in CDCl <sub>3</sub> ) |
|-------------------------------------------|-------------------------------------------|
| 150.3                                     | 150.5                                     |
| 144.8                                     | 145.0                                     |
| 143.6                                     | 143.7                                     |
| 135.8                                     | 136.0                                     |
| 133.7                                     | 133.9                                     |
| 111.1                                     | 111.2                                     |
| 64.3                                      | 64.4                                      |
| 60.4                                      | 60.5                                      |
| 57.1                                      | 57.2                                      |
| 55.9                                      | 56.1                                      |
| 47.9                                      | 48.0                                      |
| 42.5                                      | 42.7                                      |
| 40.2                                      | 40.3                                      |
| 39.3                                      | 39.4                                      |
| 37.1                                      | 37.2                                      |
| 33.4                                      | 33.5                                      |
| 33.1                                      | 33.2                                      |
| 25.2                                      | 25.4                                      |
| 24.7                                      | 24.8                                      |
| 21.3                                      | 21.5                                      |
| 21.1                                      | 21.3                                      |
| 19.7                                      | 19.8                                      |
| 18.3                                      | 18.5                                      |
| 16.1                                      | 16.3                                      |
| 16.0                                      | 16.2                                      |



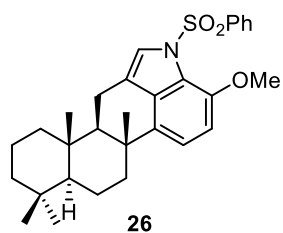

**<sup>1</sup>H NMR<sup>9</sup>**

| Literature (400 MHz in CDCl <sub>3</sub> ) | Synthetic (400 MHz in CDCl <sub>3</sub> )     |
|--------------------------------------------|-----------------------------------------------|
| 7.93 (d, <i>J</i> = 8.2 Hz, 2H)            | 7.87 – 7.94 (m, 2H)                           |
| 7.51 - 7.58 (m, 1H)                        | 7.48 – 7.57 (m, 1H)                           |
| 7.42 - 7.49 (m, 3H)                        | 7.40 - 7.48 (m, 3 H)                          |
| 6.88 (d, <i>J</i> = 8.15 Hz, 1H)           | 6.87 (d, <i>J</i> = 8.0 Hz, 1H)               |
| 6.65 (d, <i>J</i> = 8.15 Hz, 1H)           | 6.62 (d, <i>J</i> = 8.0 Hz, 1H)               |
| 3.70 (s, 3H)                               | 3.68 (s, 3H)                                  |
| 2.94 (dd, <i>J</i> = 15.8, 2.8 Hz, 1H)     | 2.91 (dd, <i>J</i> = 15.7, 3.4 Hz, 1H)        |
| 2.66 (dd, <i>J</i> = 16, 11.8 Hz, 1H)      | 2.61 (ddd, <i>J</i> = 15.5, 12.9, 2.1 Hz, 1H) |
| 2.44 (d, <i>J</i> = 12.2 Hz, 1H)           | 2.32 – 2.49 (m, 1H)                           |
| 1.85-1.88 (m, 1H)                          | 1.81 – 1.90 (m, 1H)                           |
| 1.71-1.76 (m, 2H)                          | 1.66 – 1.77 (m, 2H)                           |
| 1.66-1.70 (m, 2H)                          | 1.62 – 1.66 (m, 2H)                           |
| 1.50-1.58 (m, 2H)                          | 1.49 – 1.54 (m, 2H)                           |
| 1.46-1.48 (m, 2H)                          | 1.43 – 1.49 (m, 2H)                           |
| 1.36-1.39 (m, 1H)                          | 1.35 – 1.40 (m, 1H)                           |
| 1.13 (s, 3H)                               | 1.12 (s, 3H)                                  |
| 1.05 (s, 3H)                               | 1.04 (s, 3H)                                  |
| 0.81 – 0.92 (m, 1H)                        | 0.88 – 0.93 (m, 1H)                           |
| 0.89 (s, 6H)                               | 0.88 (s, 6H)                                  |

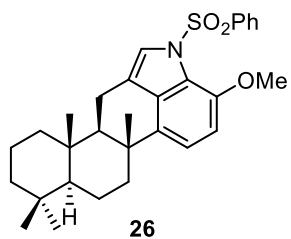

**<sup>13</sup>C NMR<sup>9</sup>**

| Literature (75 MHz in CDCl <sub>3</sub> ) | Synthetic (101 MHz in CDCl <sub>3</sub> ) |
|-------------------------------------------|-------------------------------------------|
| 145.3                                     | 145.2                                     |
| 140.6                                     | 140.4                                     |
| 138.8                                     | 138.7                                     |
| 133.2                                     | 133.1                                     |
| 130.9                                     | 130.8                                     |
| 128.9                                     | 128.8                                     |
| 127.8                                     | 127.7                                     |
| 122.5                                     | 122.4                                     |
| 121.6                                     | 121.5                                     |
| 118.8                                     | 118.7                                     |
| 116.7                                     | 116.6                                     |
| 108.2                                     | 108.0                                     |
| 56.8                                      | 56.7                                      |
| 56.6                                      | 56.5                                      |
| 56.1                                      | 56.0                                      |
| 42.1                                      | 42.0                                      |
| 40.4                                      | 40.3                                      |
| 39.1                                      | 39.0                                      |
| 38.3                                      | 38.2                                      |
| 37.4                                      | 37.3                                      |
| 33.7                                      | 33.6                                      |
| 33.6                                      | 33.5                                      |
| 25.2                                      | 25.1                                      |
| 21.8                                      | 21.7                                      |
| 19.0                                      | 18.9                                      |
| 18.9                                      | 18.8                                      |
| 18.2                                      | 18.1                                      |
| 16.5                                      | 16.4                                      |

## 7. References

- 1 Y. Zhou, X. Xu, H. Sun, G. Tao, X.-Y. Chang, X. Xing, B. Chen and C. Xu, *Nat. Commun.*, 2021, **12**, 1953.
- 2 S.-B. Mou, W. Xiao, H.-Q. Wang, S.-J. Wang and Z. Xiang, *Org. Lett.*, 2020, **22**, 1976–1979.
- 3 M. P. Polovinka, D. V. Korchagina, Y. V. Gatilov, I. Y. Bagrianskaya, V. A. Barkhash, V. B. Perutskii, N. D. Ungur, P. F. Vlad, V. V. Shcherbukhin and N. S. Zefirov, *J. Org. Chem.*, 1994, **59**, 1509–1517.
- 4 S. Kille, F. E. Zilly, J. P. Acevedo and M. T. Reetz, *Nat. Chem.*, 2011, **3**, 738–743.
- 5 S. W. Pelletier, S. Lajsic, Y. Ohtsuka and Z. Djarmati, *J. Org. Chem.*, 1975, **40**, 1607–1609.
- 6 P. F. Vlad, A. G. Ciocarlan, M. N. Coltsa, A. V. Baranovsky and N. B. Khripach, *Synth. Commun.*, 2008, **38**, 3960–3972.
- 7 Z.-F. Shi, L.-J. Wang, H. Wang, X.-P. Cao and H.-L. Zhang, *Org. Lett.*, 2007, **9**, 595–598.
- 8 L. Yang, D. E. Williams, A. Mui, C. Ong, G. Krystal, R. van Soest and R. J. Andersen, *Org. Lett.*, 2005, **7**, 1073–1076.
- 9 D. H. Dethe, S. K. Sau and S. Mahapatra, *Org. Lett.*, 2016, **18**, 6392–6395.
- 10 Z. Li, H. S. Park, J. X. Qiao, K.-S. Yeung and J.-Q. Yu, *J. Am. Chem. Soc.*, 2022, **144**, 18109–18116.
- 11 D. D. Dixon, J. W. Lockner, Q. Zhou and P. S. Baran, *J. Am. Chem. Soc.*, 2012, **134**, 8432–8435.
- 12 A. F. Barrero, E. J. Alvarez-Manzaneda, R. Chahboun, M. Cortés and V. Armstrong, *Tetrahedron*, 1999, **55**, 15181–15208.
- 13 D. H. Dethe, G. M. Murhade, B. D. Dherange and S. K. Sau, *Eur. J. Org. Chem.*, 2017, **2017**, 1143–1150.
- 14 H. TSUJIMORI and K. MORI, *Biosci. Biotechnol., Biochem.*, 2000, **64**, 1410–1415.

## 8. NMR spectra

7.26  
5.55  
5.55  
5.54  
5.54  
5.53  
3.88  
3.87  
3.85  
3.84  
3.76  
3.75  
3.73  
3.72  
1.99  
1.99  
1.98  
1.98  
1.97  
1.97  
1.96  
1.95  
1.95  
1.94  
1.94  
1.91  
1.91  
1.90  
1.88  
1.87  
1.86  
1.85  
1.85  
1.84  
1.84  
1.83  
1.83  
1.79  
1.79  
1.78  
1.78  
1.78  
1.59  
1.59  
1.58  
1.56  
1.55  
1.55  
1.54  
1.52  
1.48  
1.48  
1.47  
1.46  
1.45  
1.44  
1.44  
1.43  
1.43  
1.41  
1.41  
1.41  
1.40  
1.40  
1.39  
1.21  
1.21  
1.20  
1.20  
1.19  
1.18  
1.17  
1.16  
1.14  
1.13  
1.11  
1.11  
1.10  
1.07  
1.06  
1.04  
1.03  
0.89  
0.86  
0.86

| Parameter                     | Value                                          |
|-------------------------------|------------------------------------------------|
| 1 Title                       | Drimenol-220808.1.1.1r                         |
| 2 Comment                     |                                                |
| 3 Origin                      | Bruker BioSpin GmbH                            |
| 4 Owner                       | nmrsu                                          |
| 5 Site                        |                                                |
| 6 Instrument                  | AVANCE NEO 400 MHZ<br>DIGITAL NMR SPECTROMETER |
| 7 Author                      |                                                |
| 8 Solvent                     | CDC13                                          |
| 9 Temperature                 | 298.1                                          |
| 10 Pulse Sequence             | zg30                                           |
| 11 Experiment                 | 1D                                             |
| 12 Probe                      | Z116098_0723 (PA BBO<br>400S1 BBF-H-D-05 Z SP) |
| 13 Number of Scans            | 8                                              |
| 14 Receiver Gain              | 101.0                                          |
| 15 Relaxation Delay           | 1.0000                                         |
| 16 Pulse Width                | 8.5800                                         |
| 17 Presaturation<br>Frequency |                                                |
| 18 Acquisition Time           | 3.9977                                         |
| 19 Acquisition Date           | 2022-08-08T18:44:36                            |
| 20 Modification<br>Date       | 2023-11-17T10:24:31                            |
| 21 Class                      |                                                |
| 22 Spectrometer<br>Frequency  | 400.13                                         |
| 23 Spectral Width             | 8196.7                                         |
| 24 Lowest Frequency           | -1636.9                                        |
| 25 Nucleus                    | 1H                                             |
| 26 Acquired Size              | 32768                                          |
| 27 Spectral Size              | 65536                                          |

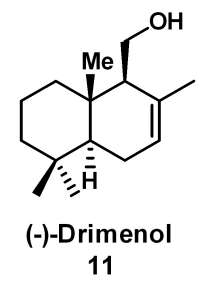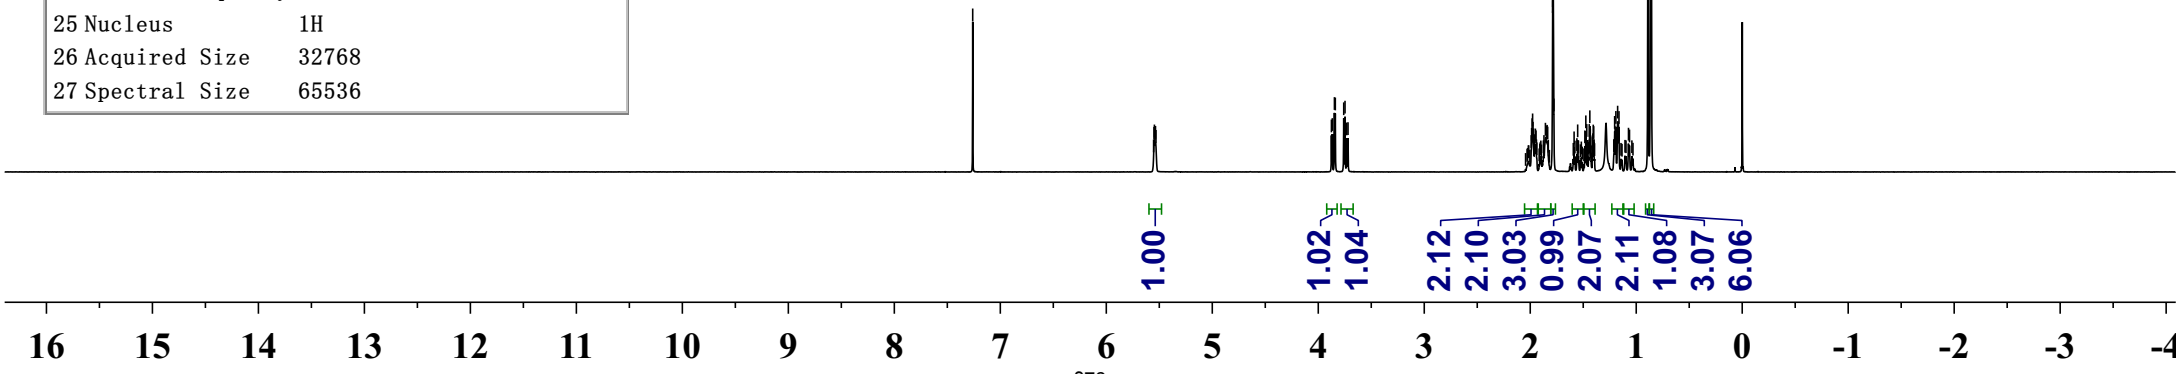

| Parameter                     | Value                                               |
|-------------------------------|-----------------------------------------------------|
| 1 Title                       | YYP-<br>drimenol-20210920.11.1.1r                   |
| 2 Comment                     |                                                     |
| 3 Origin                      | Bruker BioSpin GmbH                                 |
| 4 Owner                       | nmrsu                                               |
| 5 Site                        |                                                     |
| 6 Instrument                  | Avance NEO 600                                      |
| 7 Author                      |                                                     |
| 8 Solvent                     | CDC13                                               |
| 9 Temperature                 | 298.2                                               |
| 10 Pulse Sequence             | zpgpg30                                             |
| 11 Experiment                 | 1D                                                  |
| 12 Probe                      | Z168773_0027 (CPP1.1 BBO<br>600S3 BB-H&F-D-05 Z XT) |
| 13 Number of<br>Scans         | 128                                                 |
| 14 Receiver Gain              | 101.0                                               |
| 15 Relaxation<br>Delay        | 2.0000                                              |
| 16 Pulse Width                | 9.9100                                              |
| 17 Presaturation<br>Frequency |                                                     |
| 18 Acquisition<br>Time        | 0.9175                                              |
| 19 Acquisition<br>Date        | 2021-09-21T06:12:14                                 |
| 20 Modification<br>Date       | 2023-04-26T14:43:59                                 |
| 21 Class                      |                                                     |
| 22 Spectrometer<br>Frequency  | 150.91                                              |
| 23 Spectral Width             | 35714.3                                             |
| 24 Lowest<br>Frequency        | -2750.1                                             |
| 25 Nucleus                    | <sup>13</sup> C                                     |
| 26 Acquired Size              | 32768                                               |
| 27 Spectral Size              | 32768                                               |

—133.0

—124.2

 77.4  
 77.2  
 76.9

 61.0  
 57.4

—50.0

 42.3  
 40.0  
 36.2  
 33.5  
 33.0

 23.7  
 22.2  
 22.1  
 18.9  
 15.0
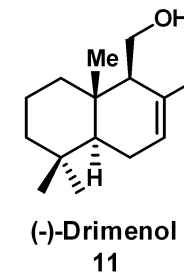

210 200 190 180 170 160 150 140 130 120 110 100 90 80 70 60 50 40 30 20 10 0 -10

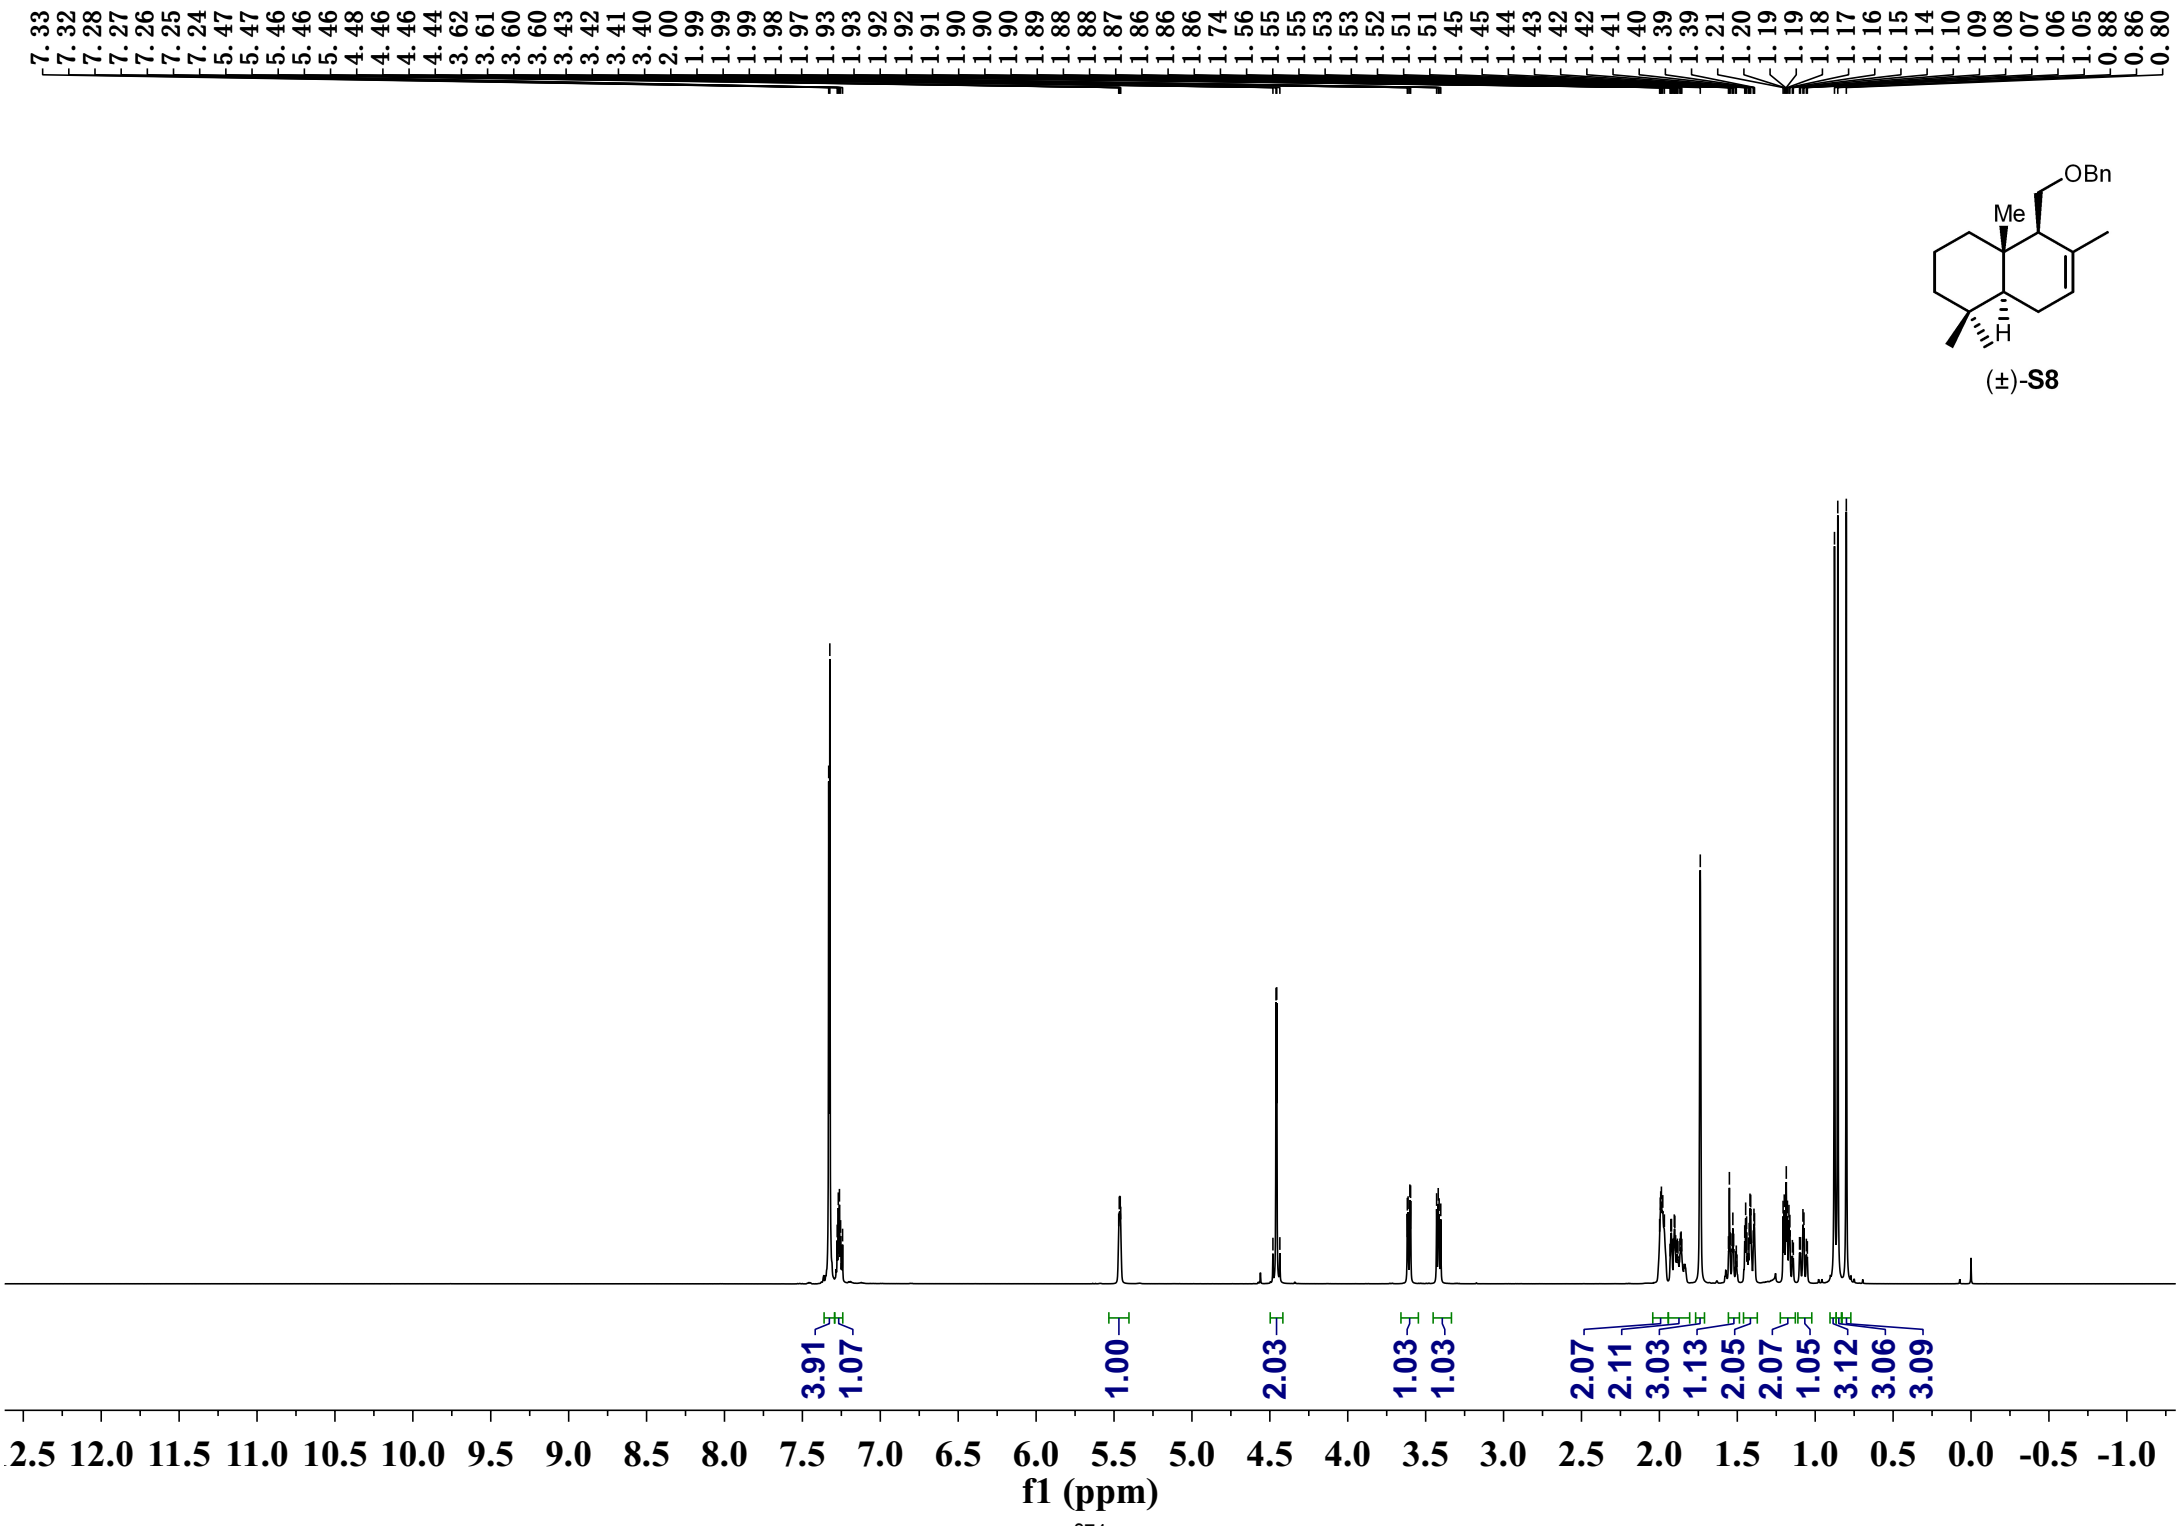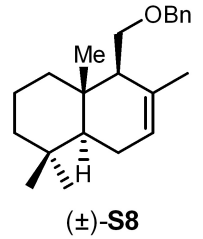

138.7  
134.1  
128.4  
127.8  
127.5  
122.9

77.4  
77.2  
76.9  
73.1  
69.3

54.8  
50.1

42.4  
39.7  
36.0  
33.5  
33.1

23.8  
22.1  
22.1  
19.0  
14.7

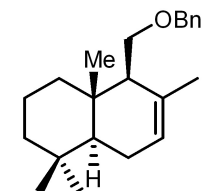

(±)-S8

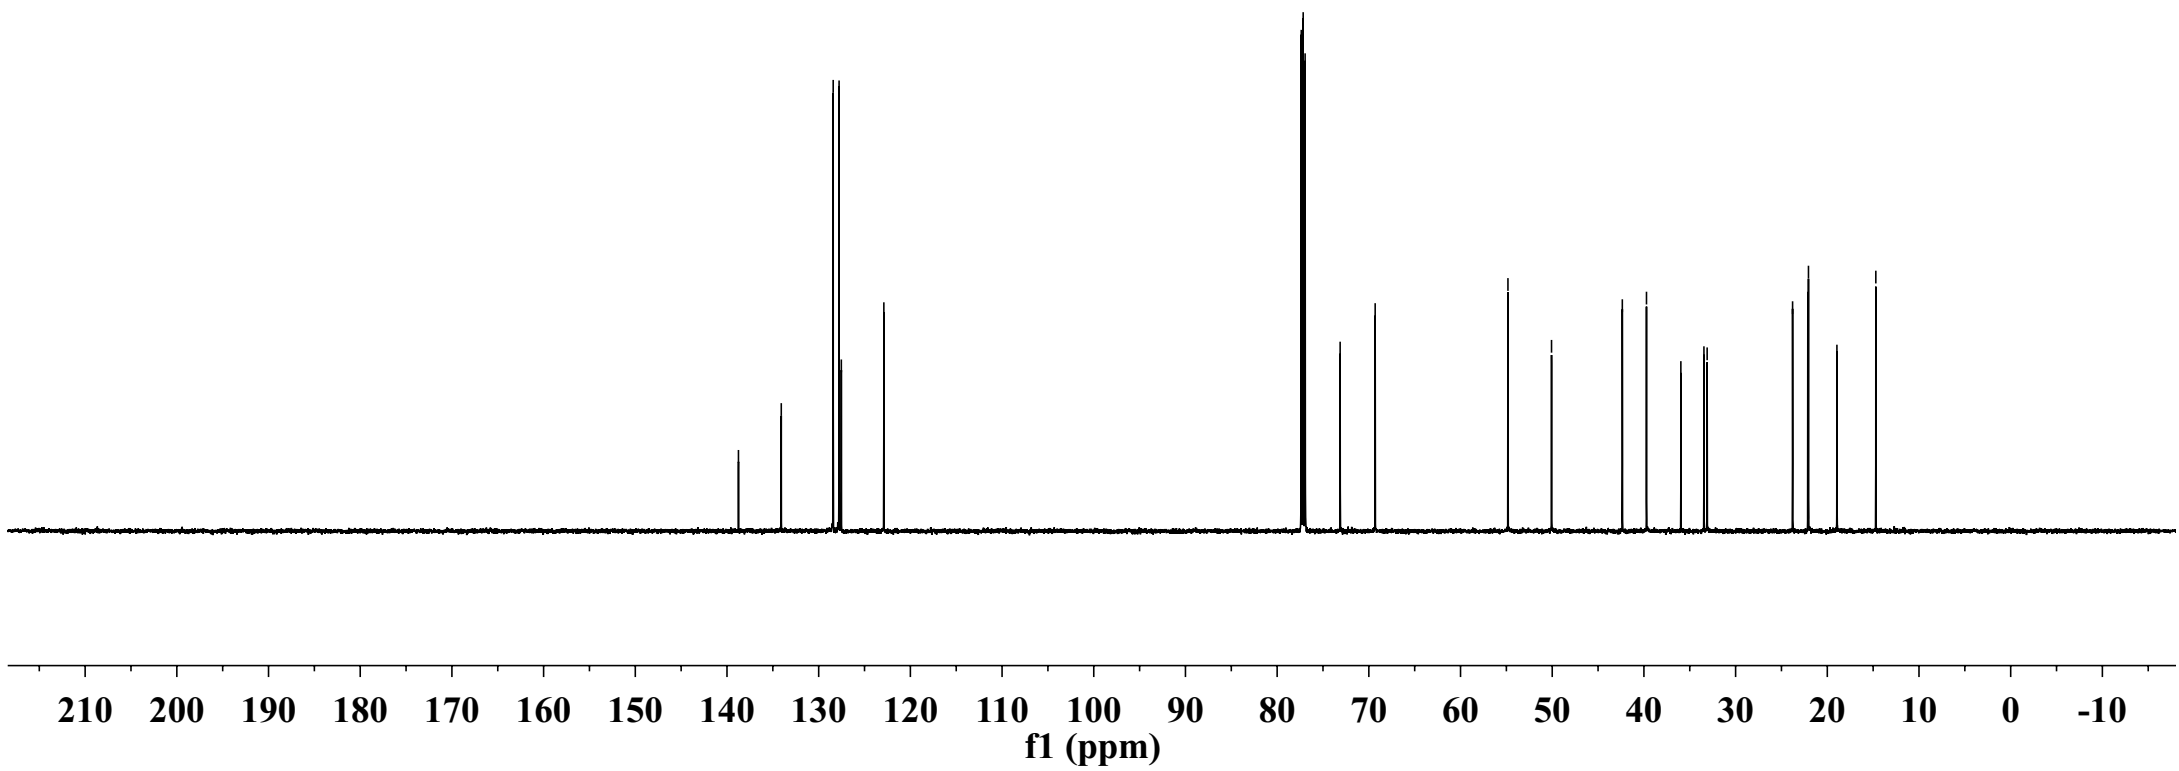

| Parameter                     | Value                                           |
|-------------------------------|-------------------------------------------------|
| 1 Title                       | 20220519-Dri-P1-65.4mg-2.1.1.1r                 |
| 2 Comment                     | 20220519-Dri-P1-65.4mg-2400M CDC13              |
| 3 Origin                      | Bruker BioSpin GmbH                             |
| 4 Owner                       | nmr                                             |
| 5 Site                        |                                                 |
| 6 Instrument                  | spect                                           |
| 7 Author                      |                                                 |
| 8 Solvent                     | CDC13                                           |
| 9 Temperature                 | 531.0                                           |
| 10 Pulse Sequence             | zg30                                            |
| 11 Experiment                 | 1D                                              |
| 12 Probe                      | 5 mm PABBO BB/ 19F-1H/<br>D Z-GRD Z108618/ 0355 |
| 13 Number of Scans            | 8                                               |
| 14 Receiver Gain              | 86.7                                            |
| 15 Relaxation Delay           | 1.0000                                          |
| 16 Pulse Width                | 15.0000                                         |
| 17 Presaturation<br>Frequency |                                                 |
| 18 Acquisition Time           | 3.9846                                          |
| 19 Acquisition Date           | 2022-05-19T23:18:50                             |
| 20 Modification Date          | 2022-05-19T23:18:00                             |
| 21 Class                      |                                                 |
| 22 Spectrometer<br>Frequency  | 400.13                                          |
| 23 Spectral Width             | 8223.7                                          |
| 24 Lowest Frequency           | -1520.6                                         |
| 25 Nucleus                    | 1H                                              |
| 26 Acquired Size              | 32768                                           |
| 27 Spectral Size              | 65536                                           |

— 7.26

5.54  
5.54  
5.54  
5.53  
5.53  
5.53  
3.86  
3.85  
3.83  
3.82  
3.75  
3.74  
3.72  
3.71  
3.27  
3.26  
3.25  
3.24  
3.23  
2.03  
1.99  
1.84  
1.77  
1.64  
1.63  
1.61  
1.28  
1.25  
1.20  
0.98  
0.86  
0.85

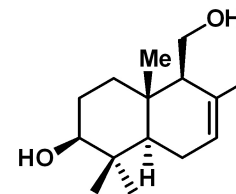

12

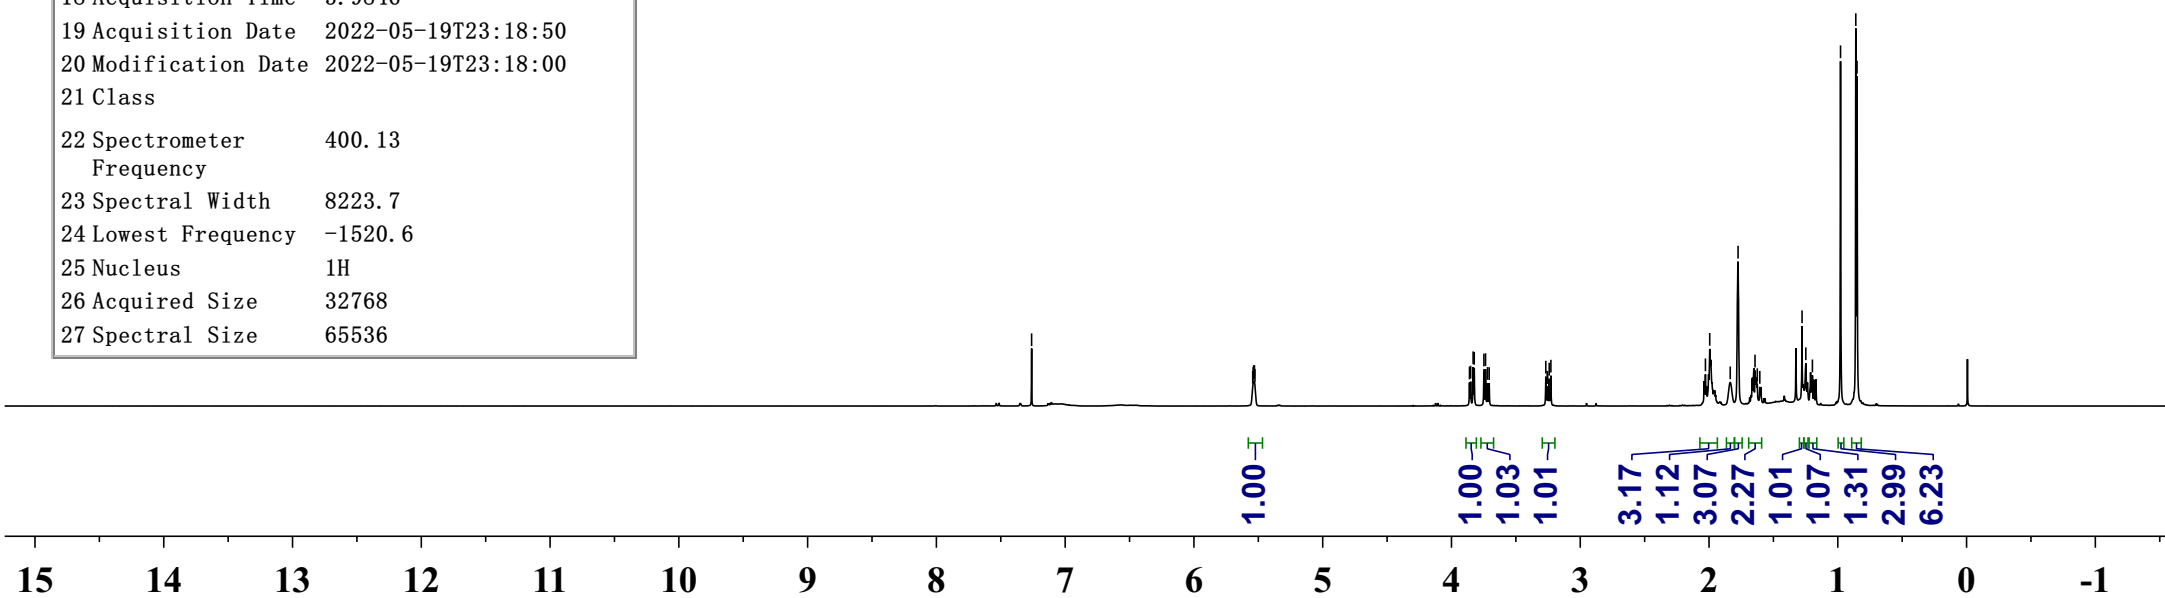



| Parameter                     | Value                                             |
|-------------------------------|---------------------------------------------------|
| 1 Title                       | YYP-3-OH-drimenol.<br>2.1.1r                      |
| 2 Comment                     |                                                   |
| 3 Origin                      | Bruker BioSpin GmbH                               |
| 4 Owner                       | nmrsu                                             |
| 5 Site                        |                                                   |
| 6 Instrument                  | AVANCE NEO 400 MHZ<br>DIGITAL NMR<br>SPECTROMETER |
| 7 Author                      |                                                   |
| 8 Solvent                     | CDC13                                             |
| 9 Temperature                 | 298.1                                             |
| 10 Pulse Sequence             | zgpg30                                            |
| 11 Experiment                 | 1D                                                |
| 12 Probe                      | Z116098_0723 (PA BBO<br>400S1 BBF-H-D-05 Z SP)    |
| 13 Number of Scans            | 400                                               |
| 14 Receiver Gain              | 62.1                                              |
| 15 Relaxation Delay           | 2.0000                                            |
| 16 Pulse Width                | 9.7000                                            |
| 17 Presaturation<br>Frequency |                                                   |
| 18 Acquisition Time           | 1.3763                                            |
| 19 Acquisition Date           | 2022-05-27T00:42:36                               |
| 20 Modification Date          | 2023-06-28T10:55:08                               |
| 21 Class                      |                                                   |
| 22 Spectrometer<br>Frequency  | 100.61                                            |
| 23 Spectral Width             | 23809.5                                           |
| 24 Lowest Frequency           | -1843.5                                           |
| 25 Nucleus                    | <sup>13</sup> C                                   |
| 26 Acquired Size              | 32768                                             |
| 27 Spectral Size              | 32768                                             |

—132.9

—124.0

79.1  
77.5  
77.2  
76.8

—60.9

—57.2

—49.5

38.8

38.0

36.0

28.2

27.4

23.4

21.9

15.5

15.0

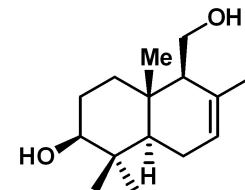

12

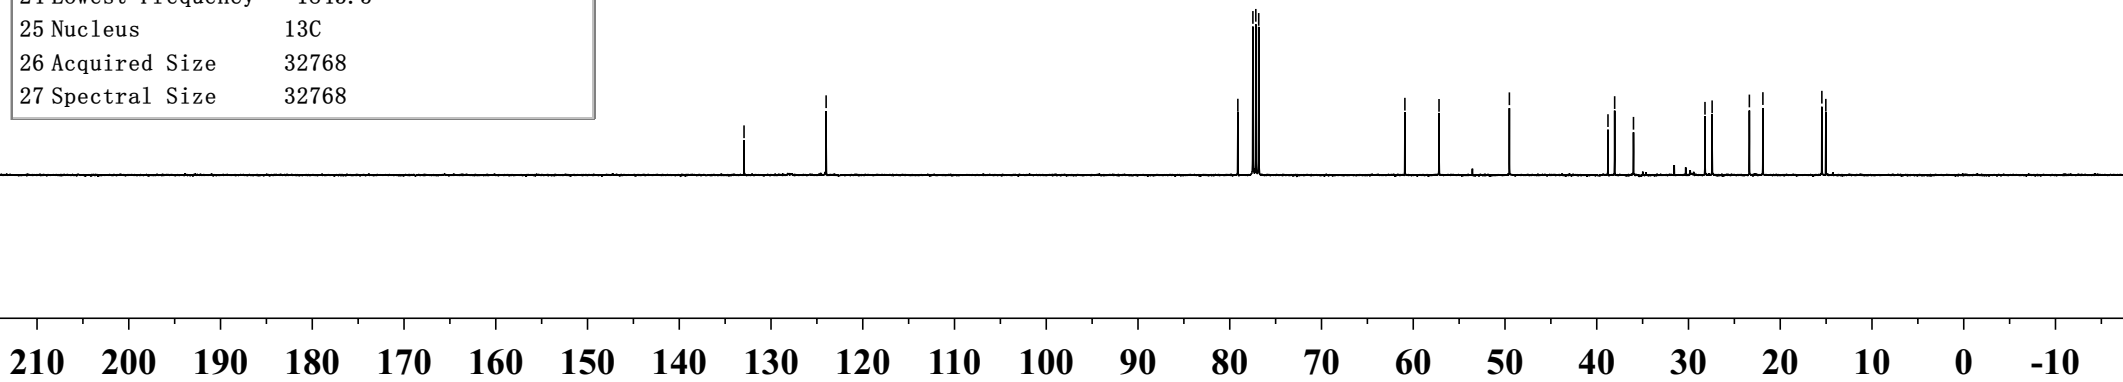

Cosy

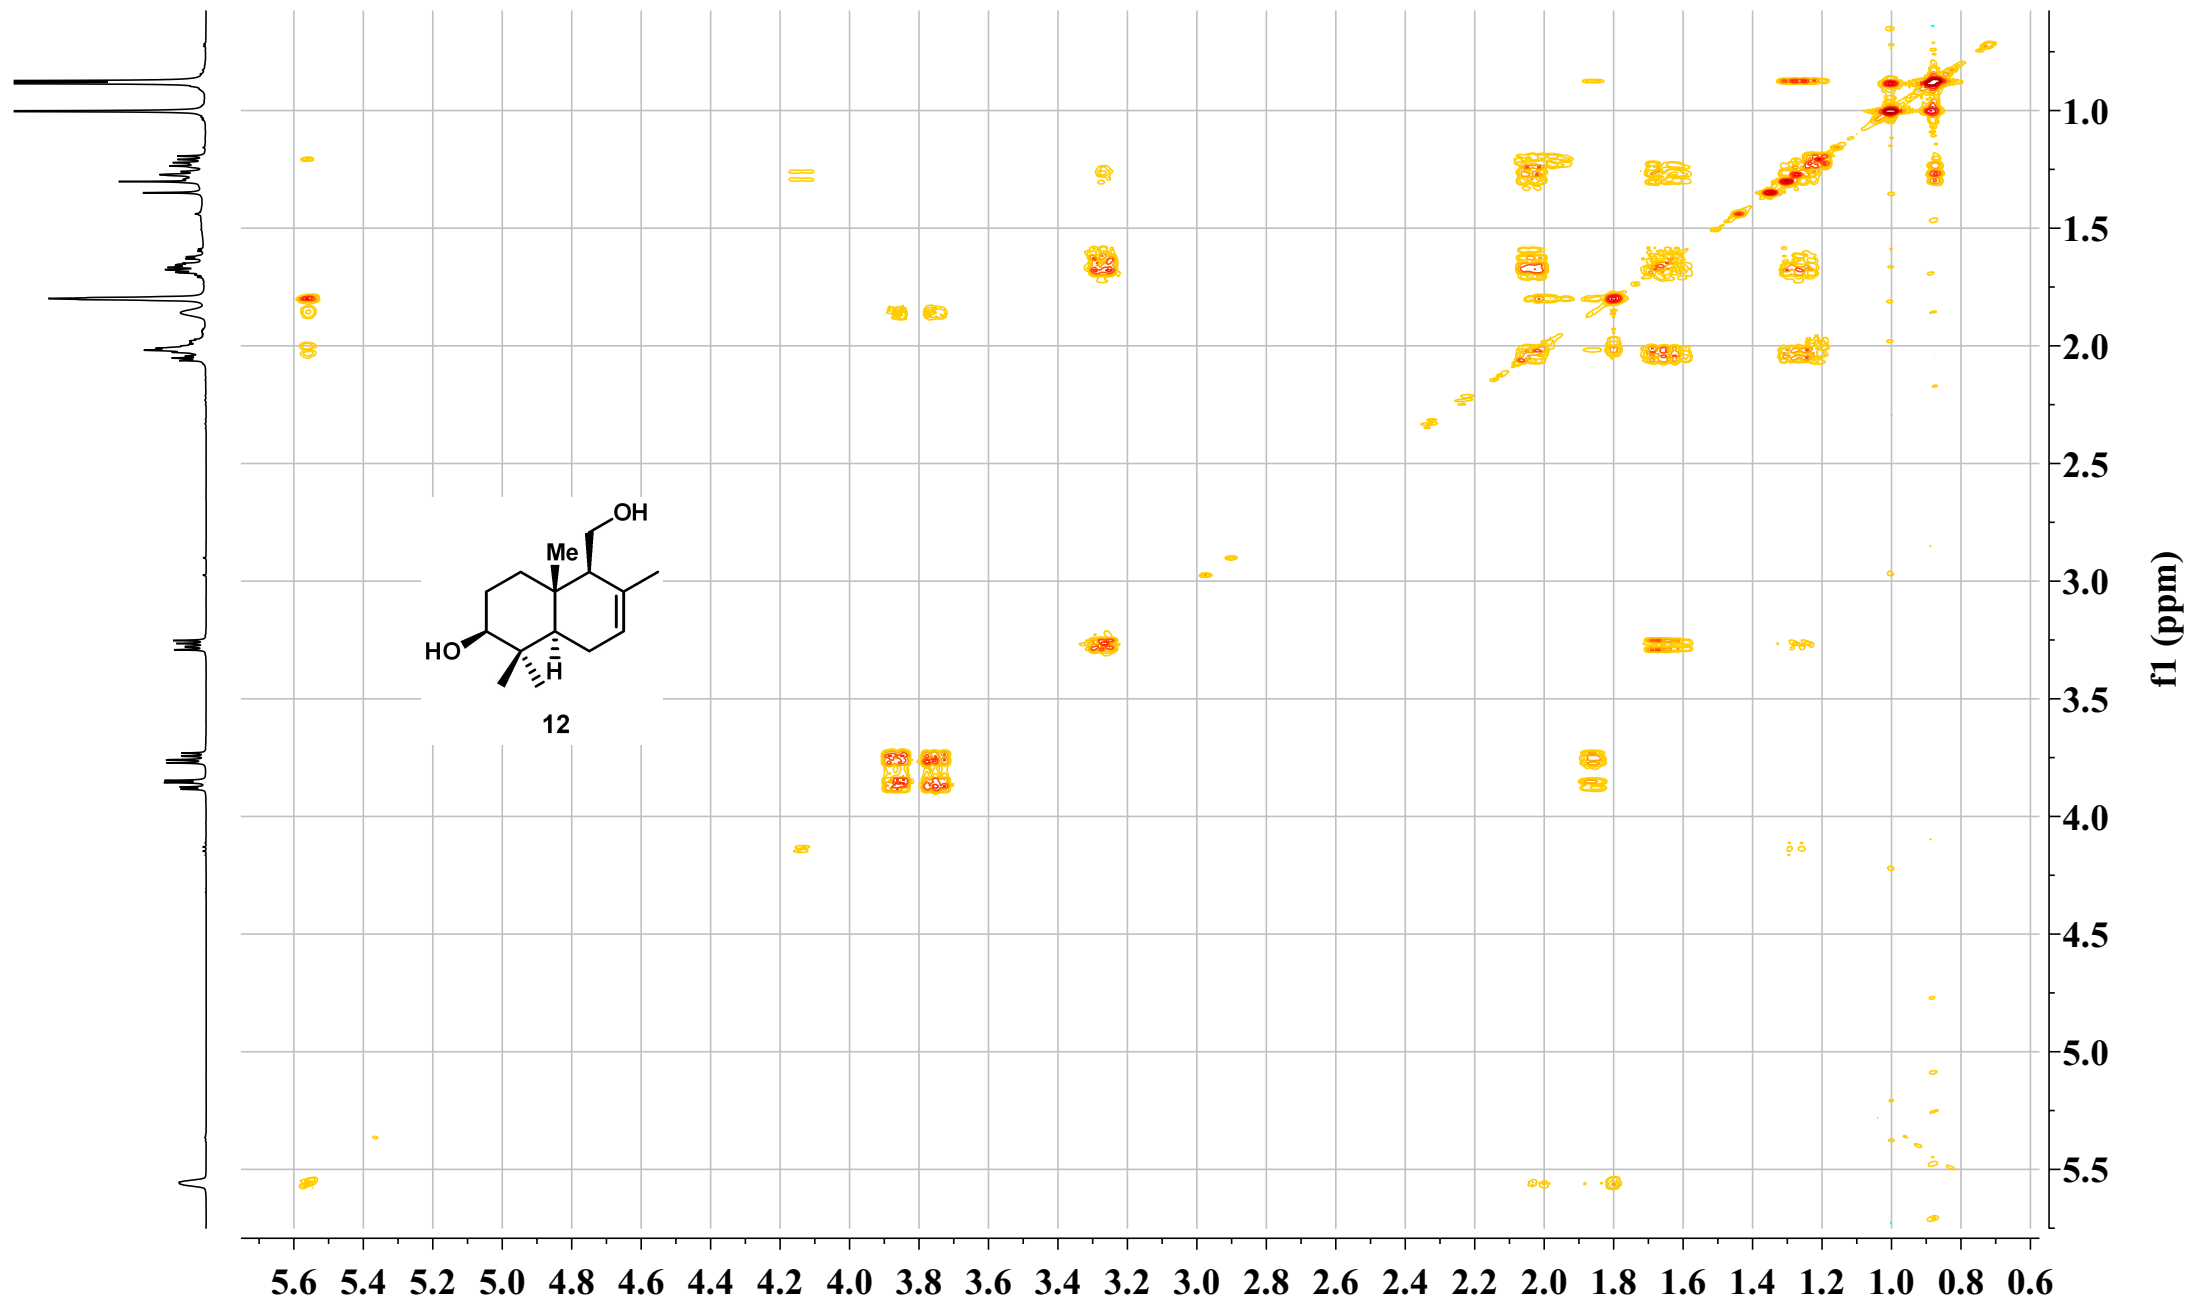

Noesy

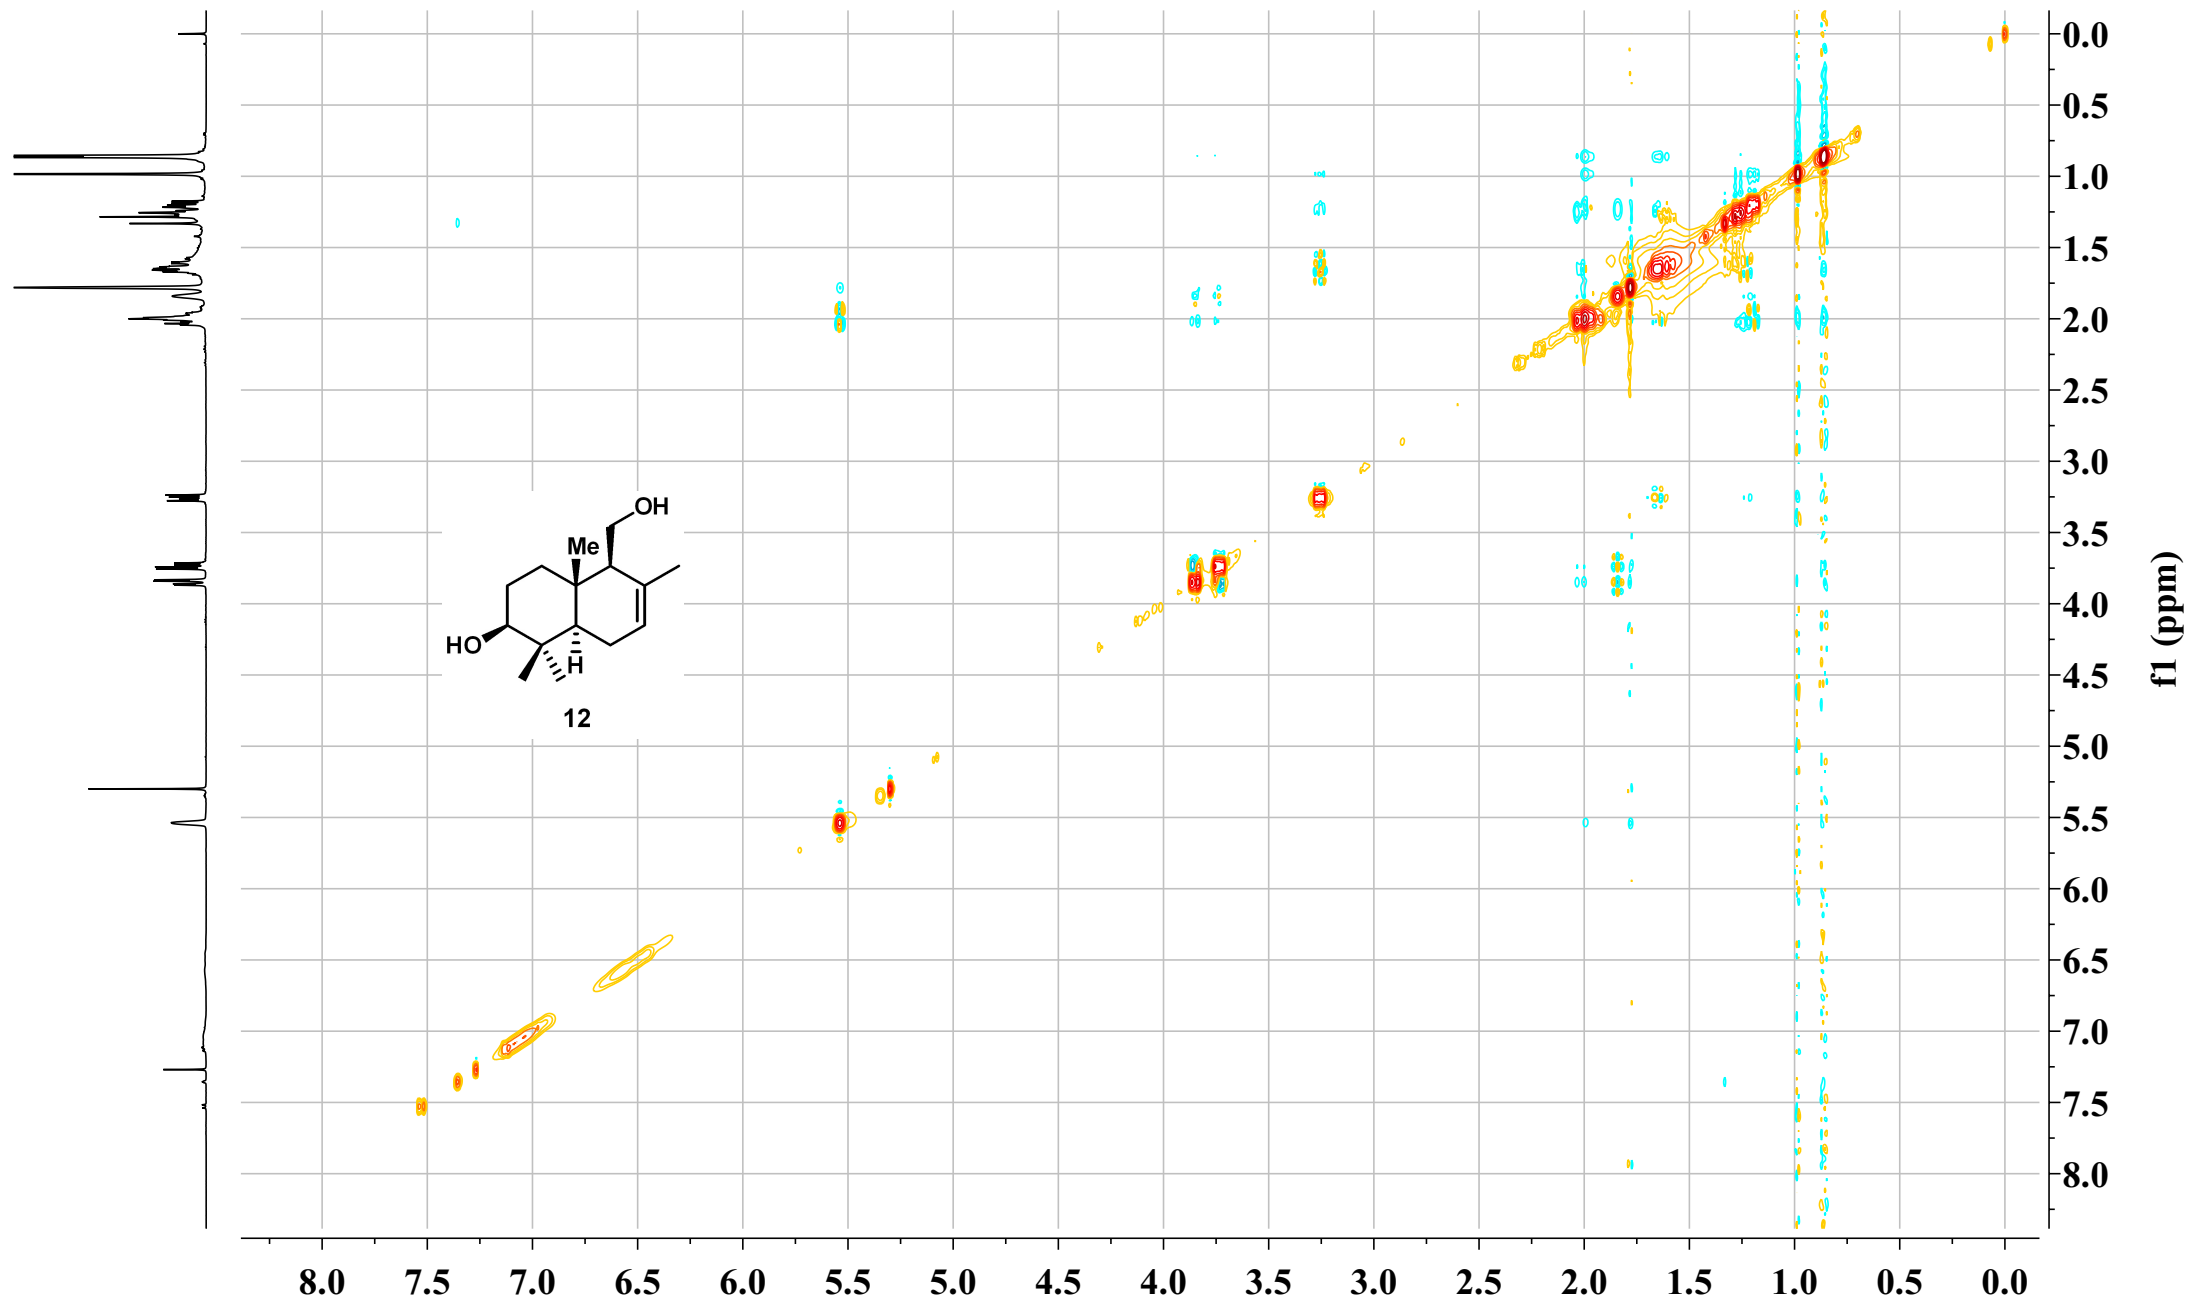

HSQC

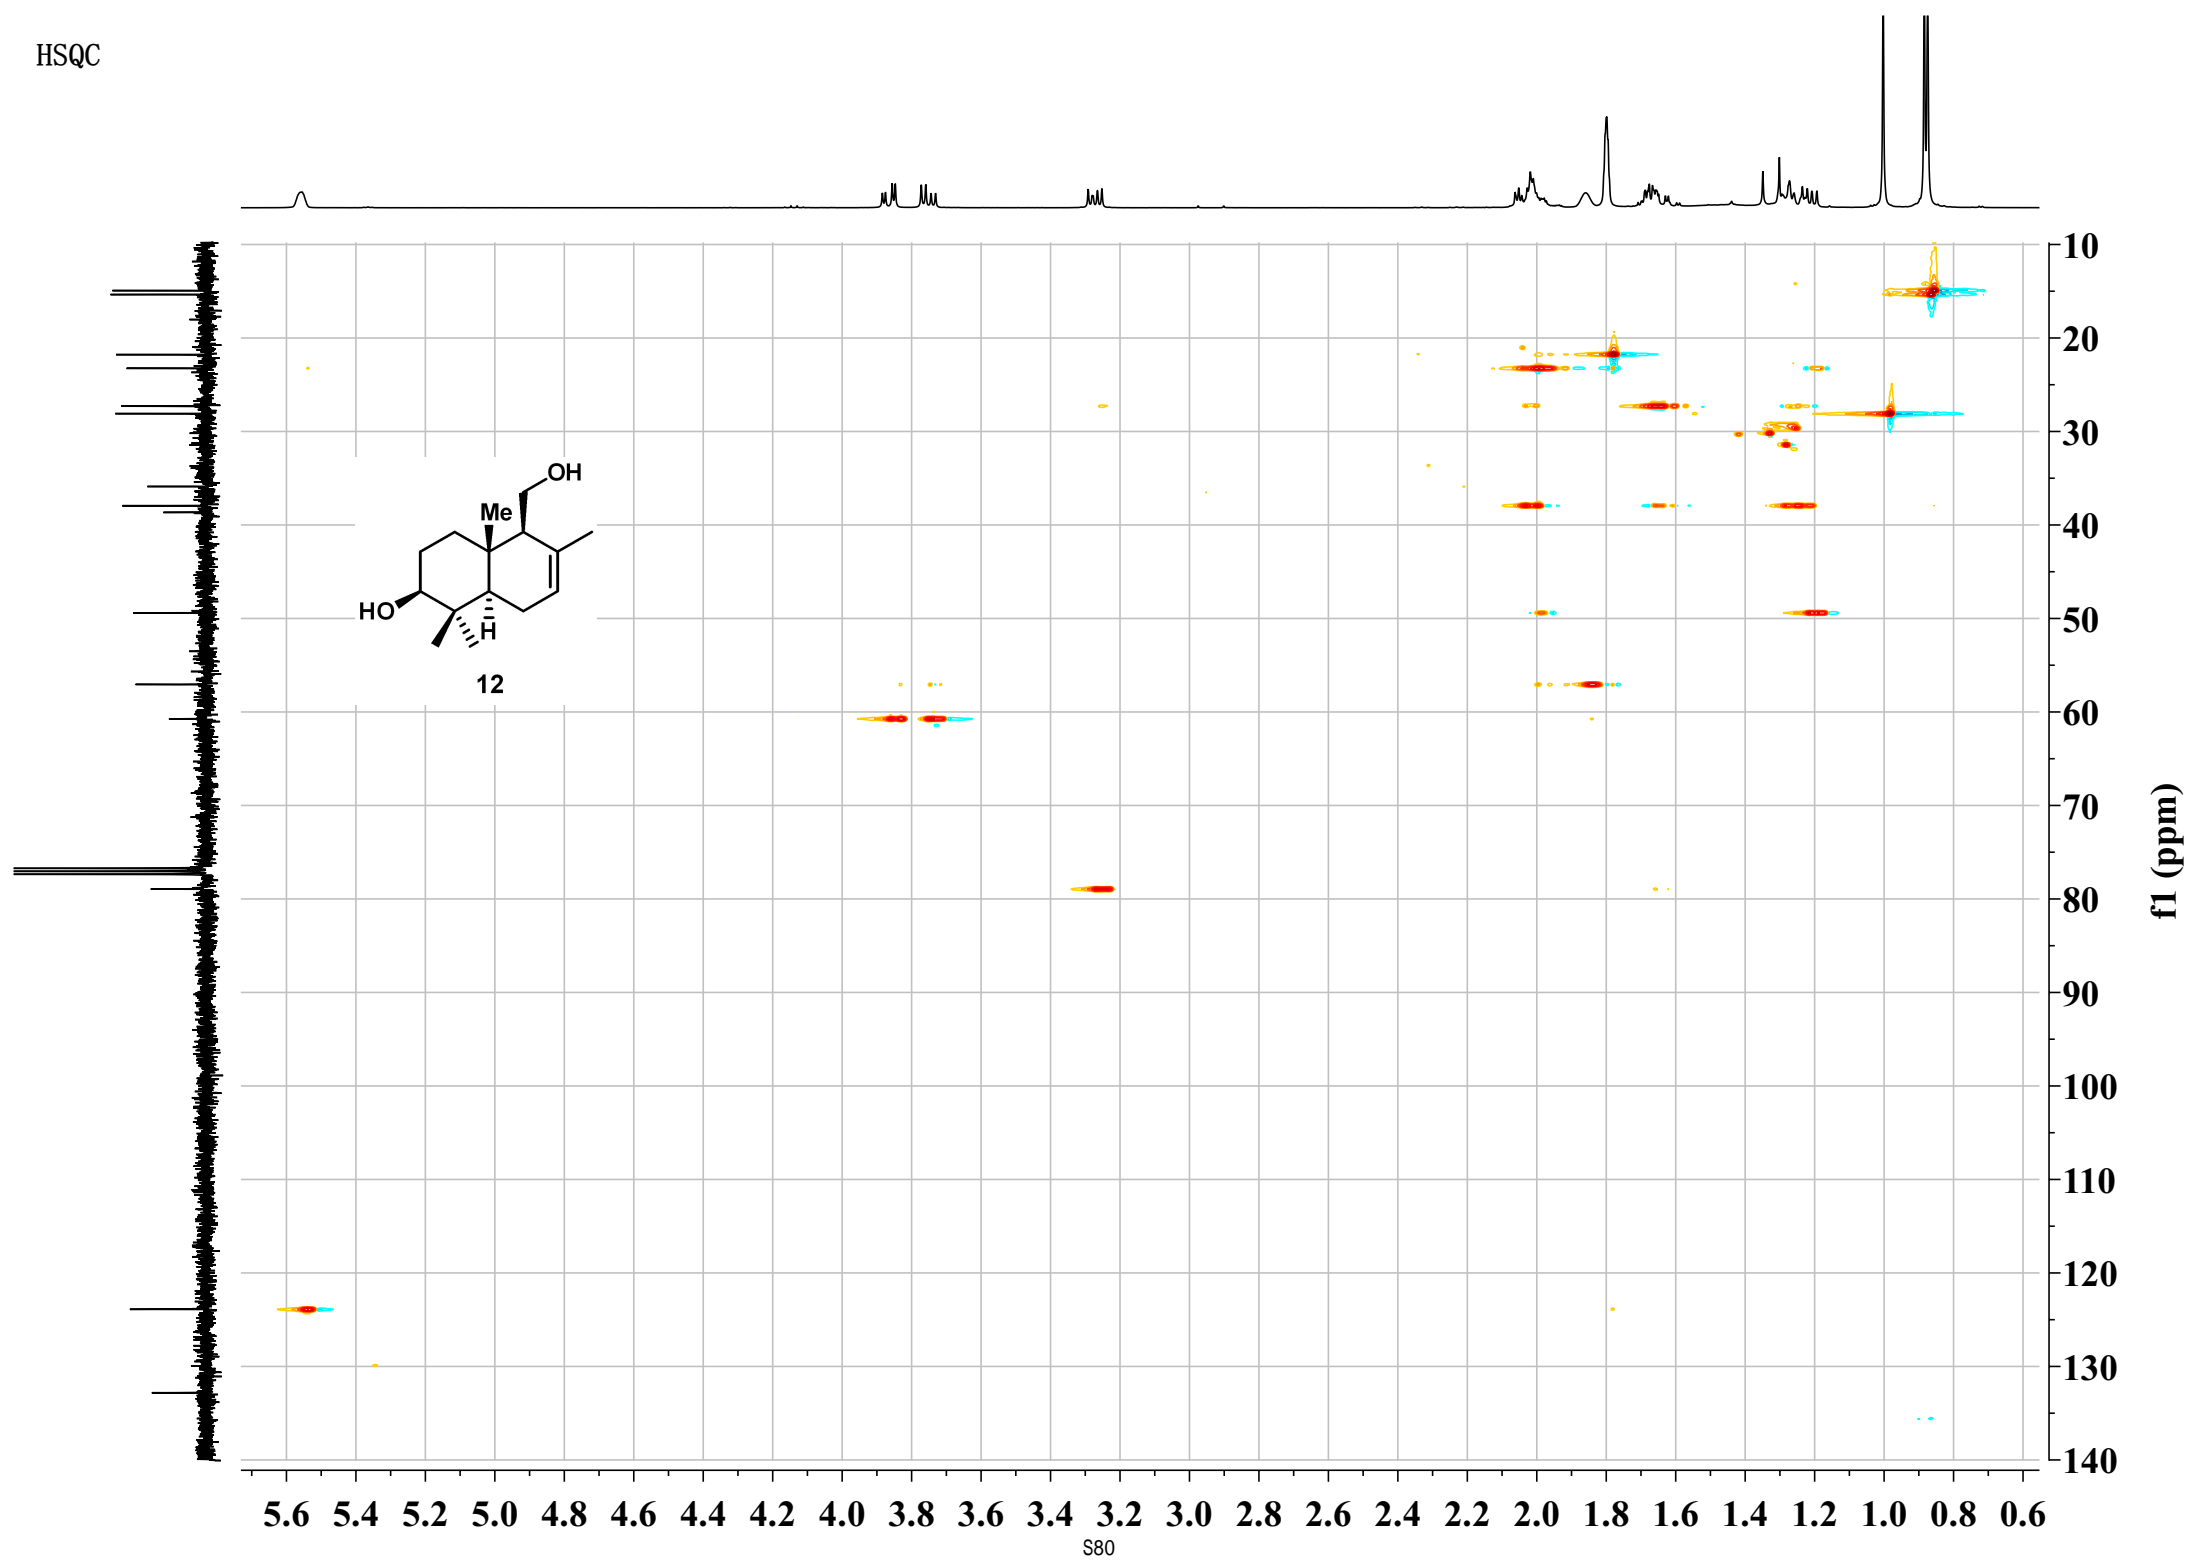

HMBC

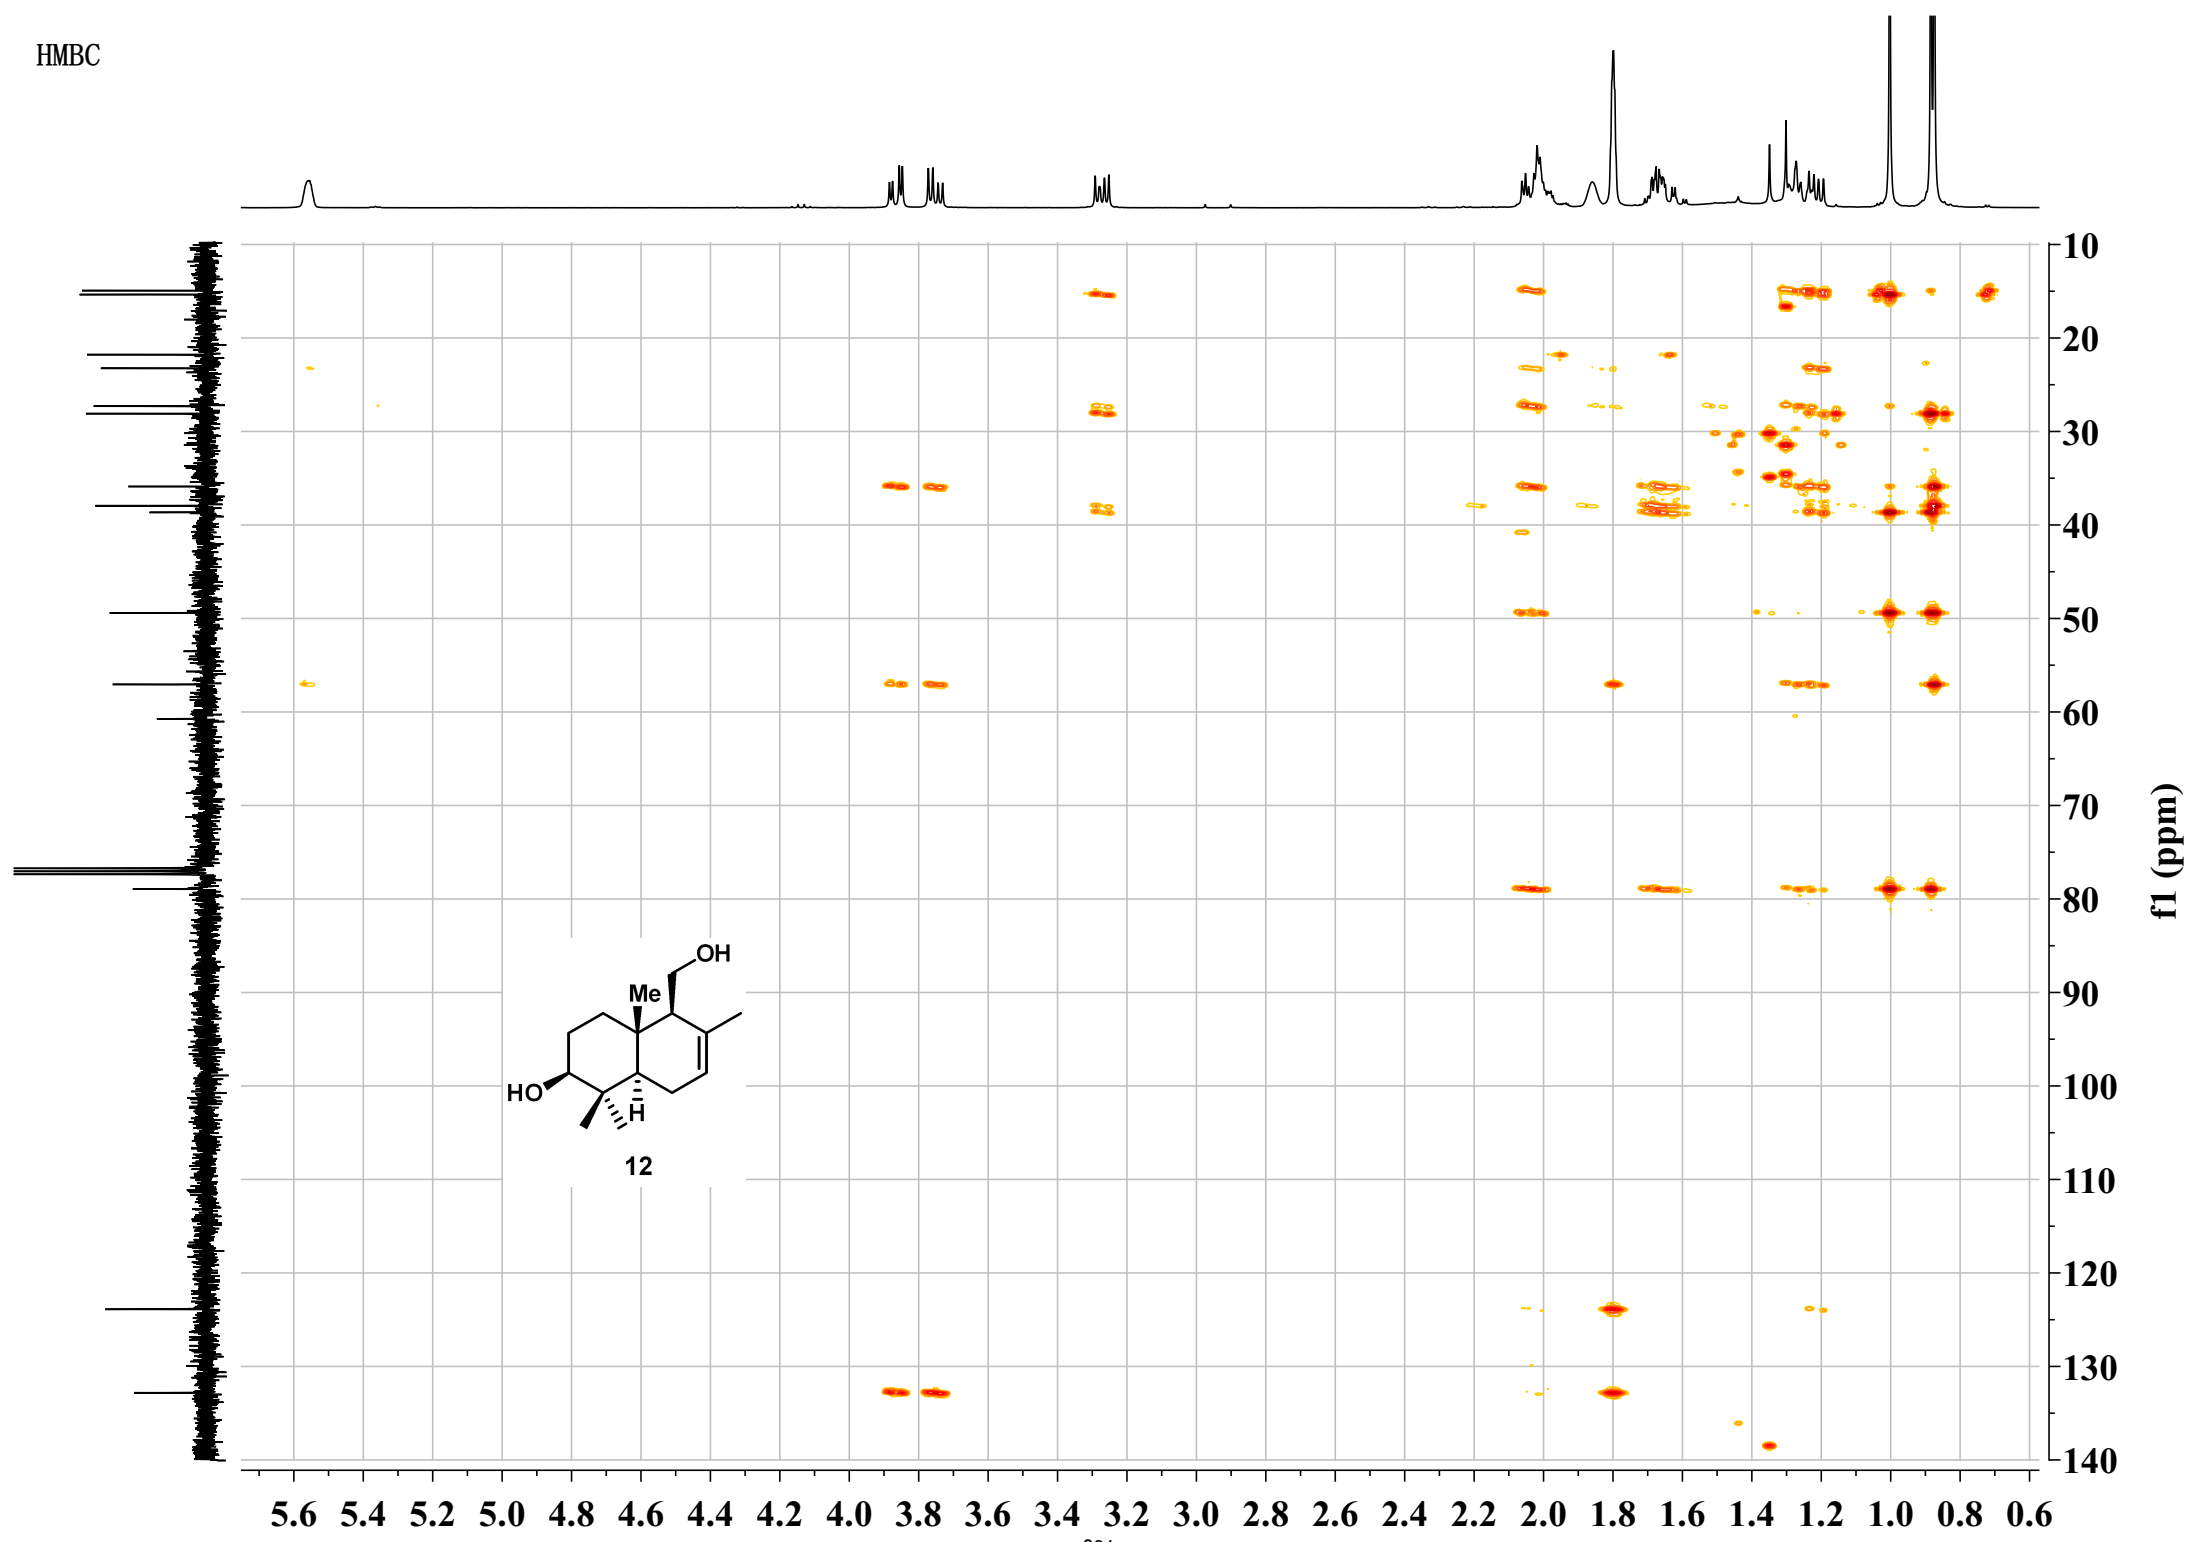

7.26  
4.01  
4.00  
3.98  
3.97  
3.97  
3.96  
3.94  
3.93  
3.21  
3.20  
3.19  
3.19  
3.17  
3.04  
3.03  
2.03  
2.02  
2.01  
2.00  
2.00  
1.99  
1.98  
1.97  
1.97  
1.96  
1.96  
1.95  
1.93  
1.92  
1.92  
1.86  
1.83  
1.79  
1.61  
1.60  
1.59  
1.59  
1.59  
1.58  
1.58  
1.58  
1.57  
1.56  
1.44  
1.43  
1.42  
1.39  
1.13  
1.11  
1.10  
1.09  
1.09  
1.08  
1.07  
1.07  
1.06  
1.05  
1.00  
0.99  
0.98  
0.95  
0.94  
0.92  
0.80

| Parameter                     | Value                                           |
|-------------------------------|-------------------------------------------------|
| 1 Title                       | 20231130-DRI p2-15 mg.<br>1.1.1r                |
| 2 Comment                     | 20231130-DRI p2-15 mg<br>400M CDC13             |
| 3 Origin                      | Bruker BioSpin GmbH                             |
| 4 Owner                       | nmr                                             |
| 5 Site                        |                                                 |
| 6 Instrument                  | spect                                           |
| 7 Author                      |                                                 |
| 8 Solvent                     | CDC13                                           |
| 9 Temperature                 | -18.3                                           |
| 10 Pulse Sequence             | zg30                                            |
| 11 Experiment                 | 1D                                              |
| 12 Probe                      | 5 mm PABBO BB/ 19F-1H/<br>D Z-GRD Z108618/ 0355 |
| 13 Number of Scans            | 8                                               |
| 14 Receiver Gain              | 78.8                                            |
| 15 Relaxation Delay           | 1.0000                                          |
| 16 Pulse Width                | 15.0000                                         |
| 17 Presaturation<br>Frequency |                                                 |
| 18 Acquisition Time           | 3.9846                                          |
| 19 Acquisition Date           | 2023-11-30T19:07:32                             |
| 20 Modification Date          | 2023-11-30T19:07:00                             |
| 21 Class                      |                                                 |
| 22 Spectrometer<br>Frequency  | 400.13                                          |
| 23 Spectral Width             | 8223.7                                          |
| 24 Lowest Frequency           | -1520.6                                         |
| 25 Nucleus                    | 1H                                              |
| 26 Acquired Size              | 32768                                           |
| 27 Spectral Size              | 65536                                           |

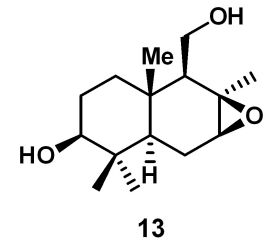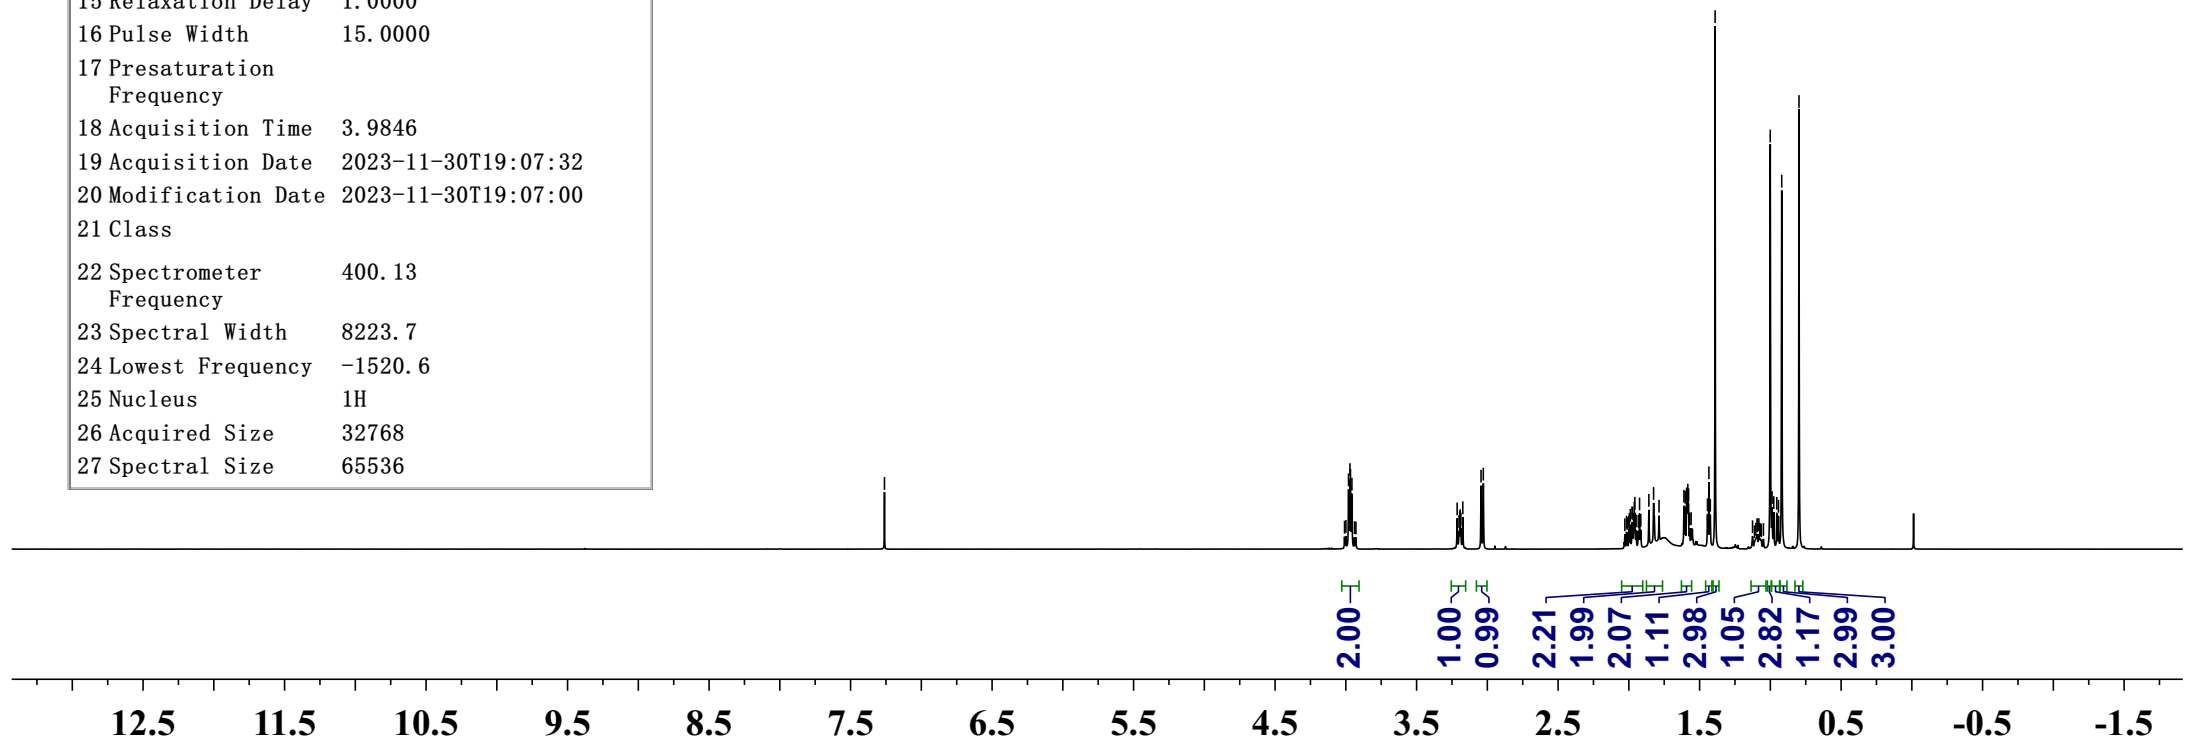

| Parameter                     | Value                                           |
|-------------------------------|-------------------------------------------------|
| 1 Title                       | 20231130-DRI p2-15 mg.<br>2.1.1r                |
| 2 Comment                     | 20231130-DRI p2-15 mg<br>400M CDC13             |
| 3 Origin                      | Bruker BioSpin GmbH                             |
| 4 Owner                       | nmr                                             |
| 5 Site                        |                                                 |
| 6 Instrument                  | spect                                           |
| 7 Author                      |                                                 |
| 8 Solvent                     | CDC13                                           |
| 9 Temperature                 | -18.3                                           |
| 10 Pulse Sequence             | zgpg30                                          |
| 11 Experiment                 | 1D                                              |
| 12 Probe                      | 5 mm PABBO BB/ 19F-1H/<br>D Z-GRD Z108618/ 0355 |
| 13 Number of Scans            | 31                                              |
| 14 Receiver Gain              | 195.8                                           |
| 15 Relaxation Delay           | 2.0000                                          |
| 16 Pulse Width                | 10.5800                                         |
| 17 Presaturation<br>Frequency |                                                 |
| 18 Acquisition Time           | 1.2583                                          |
| 19 Acquisition Date           | 2023-11-30T19:09:22                             |
| 20 Modification Date          | 2023-11-30T19:10:00                             |
| 21 Class                      |                                                 |
| 22 Spectrometer<br>Frequency  | 100.61                                          |
| 23 Spectral Width             | 26041.7                                         |
| 24 Lowest Frequency           | -2444.1                                         |
| 25 Nucleus                    | 13C                                             |
| 26 Acquired Size              | 32768                                           |
| 27 Spectral Size              | 32768                                           |

78.9  
77.5  
77.2  
76.8  
60.7  
60.6  
59.4  
55.1  
49.2  
39.0  
38.7  
36.1  
28.2  
27.0  
22.9  
21.7  
16.0  
15.3

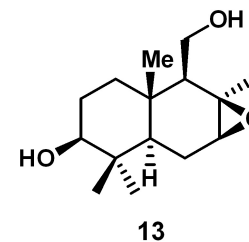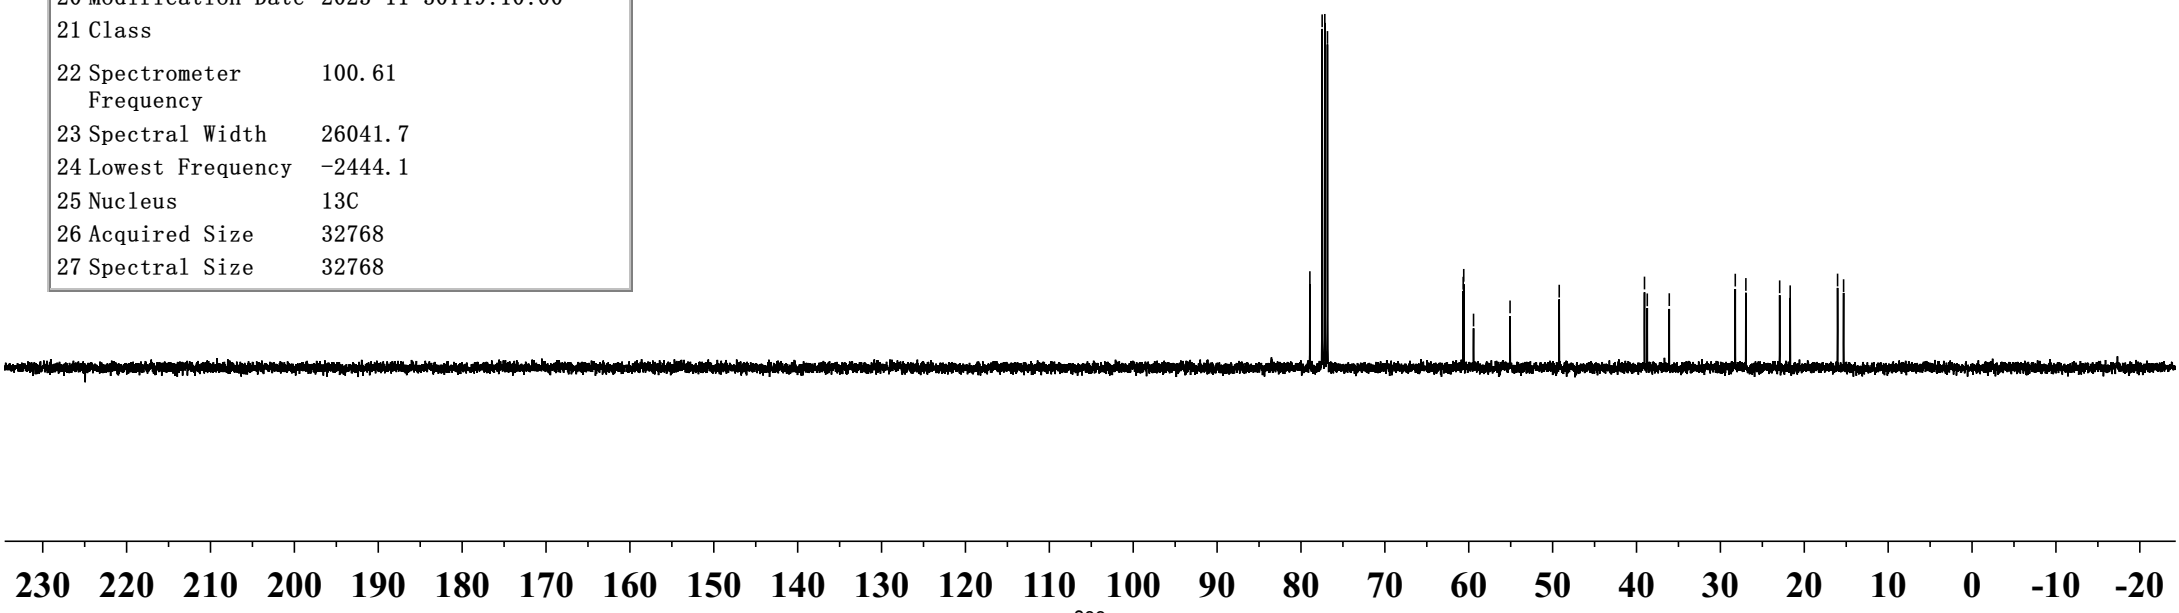

7.26  
5.45  
5.45  
5.44  
5.44  
5.44  
3.51  
3.50  
3.49  
3.49  
2.97  
2.96  
2.96  
2.94  
2.48  
2.47  
2.47  
2.47  
2.46  
1.99  
1.96  
1.94  
1.94  
1.92  
1.92  
1.91  
1.86  
1.85  
1.84  
1.84  
1.83  
1.83  
1.82  
1.81  
1.80  
1.79  
1.56  
1.55  
1.55  
1.54  
1.54  
1.53  
1.53  
1.51  
1.50  
1.49  
1.49  
1.48  
1.47  
1.46  
1.43  
1.43  
1.43  
1.42  
1.41  
1.41  
1.41  
1.40  
1.20  
1.19  
1.19  
1.19  
1.18  
1.17  
1.17  
1.17  
1.15  
1.15  
1.13  
1.12  
0.87  
0.85  
0.79

| Parameter                     | Value                                          |
|-------------------------------|------------------------------------------------|
| 1 Title                       | YYP-G-118-1-2.10.1.1r                          |
| 2 Comment                     |                                                |
| 3 Origin                      | Bruker BioSpin GmbH                            |
| 4 Owner                       | nmrsu                                          |
| 5 Site                        |                                                |
| 6 Instrument                  | Avance NEO 600                                 |
| 7 Author                      |                                                |
| 8 Solvent                     | CDC13                                          |
| 9 Temperature                 | 298.1                                          |
| 10 Pulse Sequence             | zg30                                           |
| 11 Experiment                 | 1D                                             |
| 12 Probe                      | Z114607_0339 (PA BBO<br>600S3 BBF-H-D-05 Z SP) |
| 13 Number of Scans            | 6                                              |
| 14 Receiver Gain              | 22.6                                           |
| 15 Relaxation Delay           | 1.0000                                         |
| 16 Pulse Width                | 10.0000                                        |
| 17 Presaturation<br>Frequency |                                                |
| 18 Acquisition Time           | 2.7525                                         |
| 19 Acquisition Date           | 2023-11-24T21:31:17                            |
| 20 Modification Date          | 2023-11-27T09:35:11                            |
| 21 Class                      |                                                |
| 22 Spectrometer<br>Frequency  | 600.15                                         |
| 23 Spectral Width             | 11904.8                                        |
| 24 Lowest Frequency           | -2260.9                                        |
| 25 Nucleus                    | <sup>1</sup> H                                 |
| 26 Acquired Size              | 32768                                          |
| 27 Spectral Size              | 65536                                          |

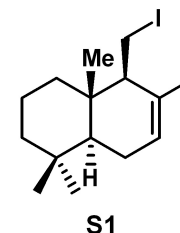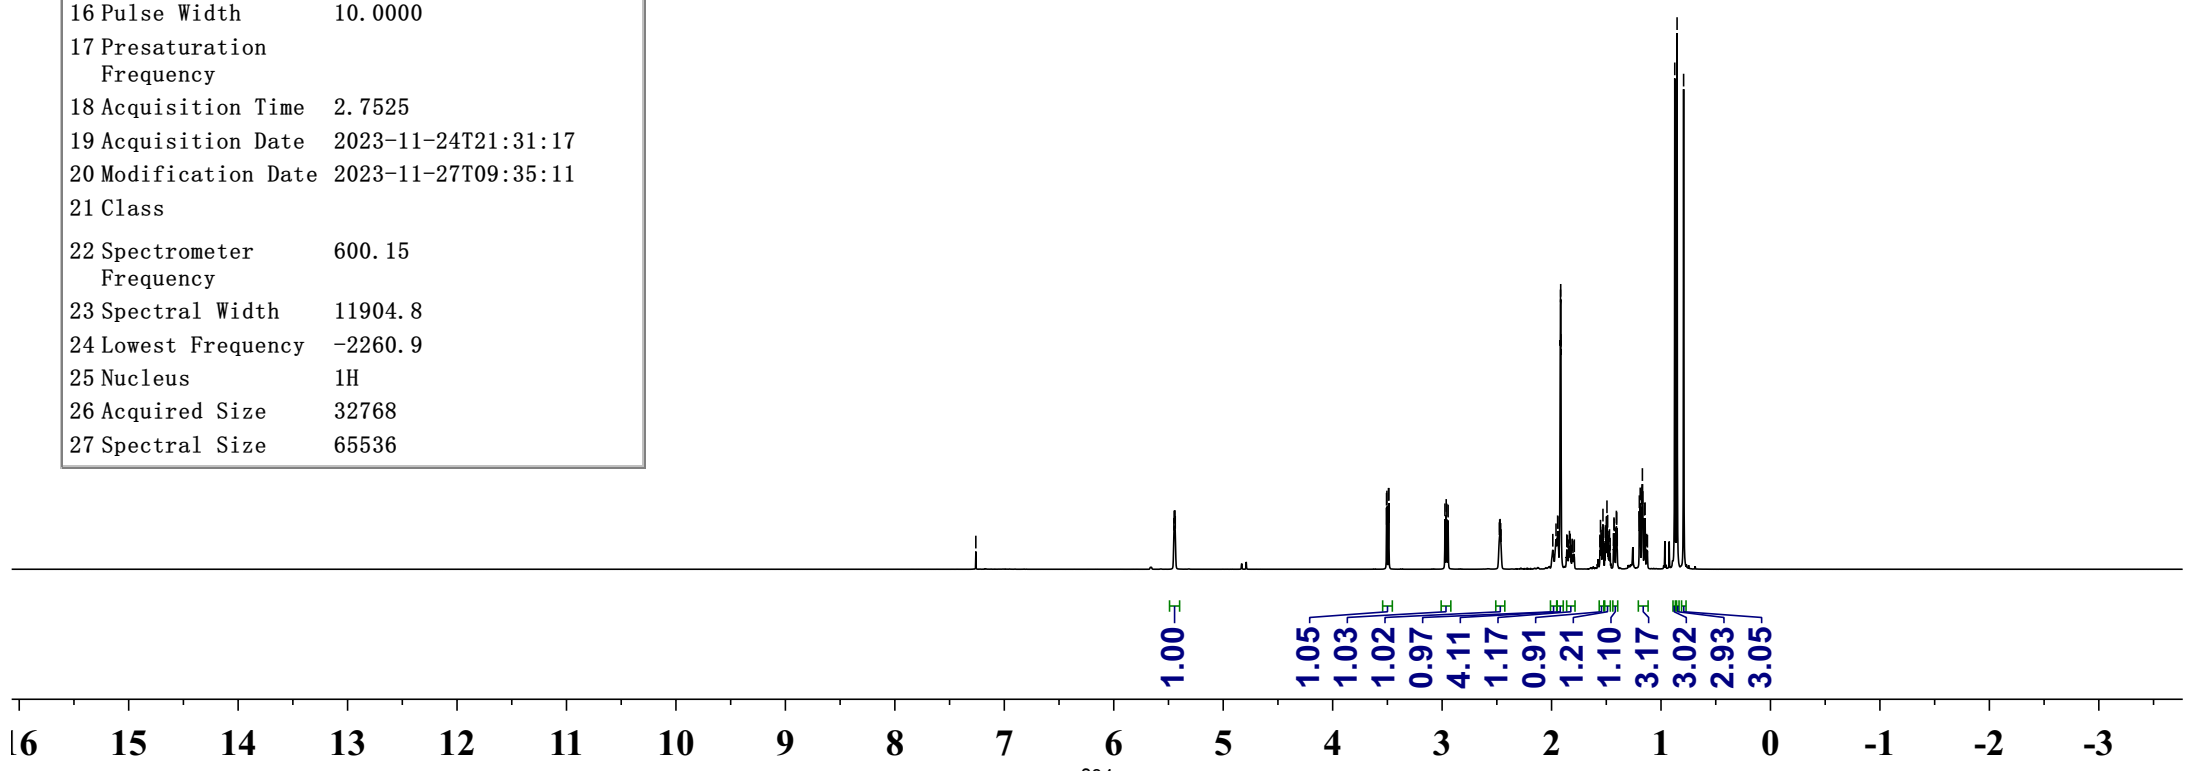



| Parameter                     | Value                                          |
|-------------------------------|------------------------------------------------|
| 1 Title                       | YYP-G-118-1-2. 11. 1. 1r                       |
| 2 Comment                     |                                                |
| 3 Origin                      | Bruker BioSpin GmbH                            |
| 4 Owner                       | nmrsu                                          |
| 5 Site                        |                                                |
| 6 Instrument                  | Avance NEO 600                                 |
| 7 Author                      |                                                |
| 8 Solvent                     | CDC13                                          |
| 9 Temperature                 | 298.4                                          |
| 10 Pulse Sequence             | zgpg30                                         |
| 11 Experiment                 | 1D                                             |
| 12 Probe                      | Z114607_0339 (PA BBO<br>600S3 BBF-H-D-05 Z SP) |
| 13 Number of Scans            | 31                                             |
| 14 Receiver Gain              | 101.0                                          |
| 15 Relaxation Delay           | 2.0000                                         |
| 16 Pulse Width                | 11.5000                                        |
| 17 Presaturation<br>Frequency |                                                |
| 18 Acquisition Time           | 0.9175                                         |
| 19 Acquisition Date           | 2023-11-24T21:34:09                            |
| 20 Modification Date          | 2023-11-27T09:35:11                            |
| 21 Class                      |                                                |
| 22 Spectrometer<br>Frequency  | 150.91                                         |
| 23 Spectral Width             | 35714.3                                        |
| 24 Lowest Frequency           | -2750.5                                        |
| 25 Nucleus                    | 13C                                            |
| 26 Acquired Size              | 32768                                          |
| 27 Spectral Size              | 32768                                          |

—133.1

—123.9

77.4  
77.2  
76.9

—58.5

—50.2

42.1  
39.2  
38.7  
33.2  
33.2

23.7  
22.0  
21.9  
18.9  
13.4

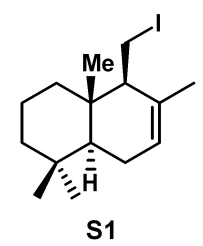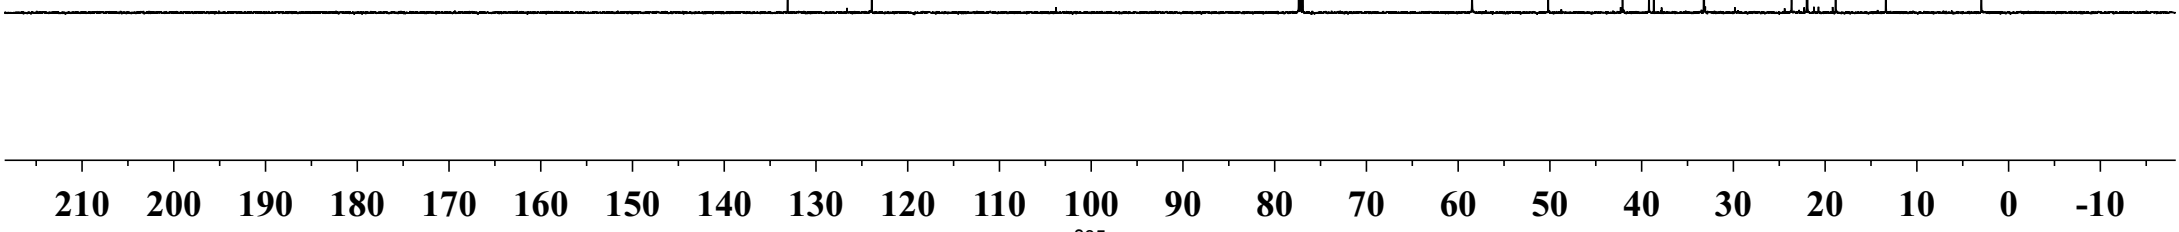

7.26  
5.49  
5.49  
5.48  
5.48  
5.47  
3.67  
3.66  
3.64  
3.64  
3.30  
3.29  
3.28  
3.26  
2.38  
2.37  
2.36  
1.97  
1.96  
1.95  
1.95  
1.95  
1.92  
1.91  
1.86  
1.86  
1.85  
1.80  
1.80  
1.80  
1.79  
1.79  
1.55  
1.54  
1.53  
1.51  
1.51  
1.51  
1.50  
1.49  
1.49  
1.48  
1.47  
1.45  
1.44  
1.44  
1.44  
1.43  
1.43  
1.41  
1.41  
1.41  
1.40  
1.40  
1.39  
1.21  
1.21  
1.20  
1.20  
1.19  
1.19  
1.17  
1.16  
1.14  
1.13  
1.11  
1.10  
0.88  
0.86  
0.81

| Parameter                     | Value                                             |
|-------------------------------|---------------------------------------------------|
| 1 Title                       | YYP-D-179-1-2.1.1.1r                              |
| 2 Comment                     |                                                   |
| 3 Origin                      | Bruker BioSpin GmbH                               |
| 4 Owner                       | nmr-su                                            |
| 5 Site                        |                                                   |
| 6 Instrument                  | AVANCE NEO 400 MHZ<br>DIGITAL NMR<br>SPECTROMETER |
| 7 Author                      |                                                   |
| 8 Solvent                     | CDC13                                             |
| 9 Temperature                 | 295.9                                             |
| 10 Pulse Sequence             | zg30                                              |
| 11 Experiment                 | 1D                                                |
| 12 Probe                      | Z116098_0723 (PA BBO<br>400S1 BBF-H-D-05 Z SP)    |
| 13 Number of Scans            | 3                                                 |
| 14 Receiver Gain              | 101.0                                             |
| 15 Relaxation Delay           | 1.0000                                            |
| 16 Pulse Width                | 8.5800                                            |
| 17 Presaturation<br>Frequency |                                                   |
| 18 Acquisition Time           | 3.9977                                            |
| 19 Acquisition Date           | 2022-04-12T22:26:05                               |
| 20 Modification Date          | 2023-10-19T16:42:24                               |
| 21 Class                      |                                                   |
| 22 Spectrometer<br>Frequency  | 400.13                                            |
| 23 Spectral Width             | 8196.7                                            |
| 24 Lowest Frequency           | -1637.1                                           |
| 25 Nucleus                    | <sup>1</sup> H                                    |
| 26 Acquired Size              | 32768                                             |
| 27 Spectral Size              | 65536                                             |

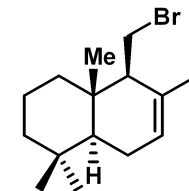

9

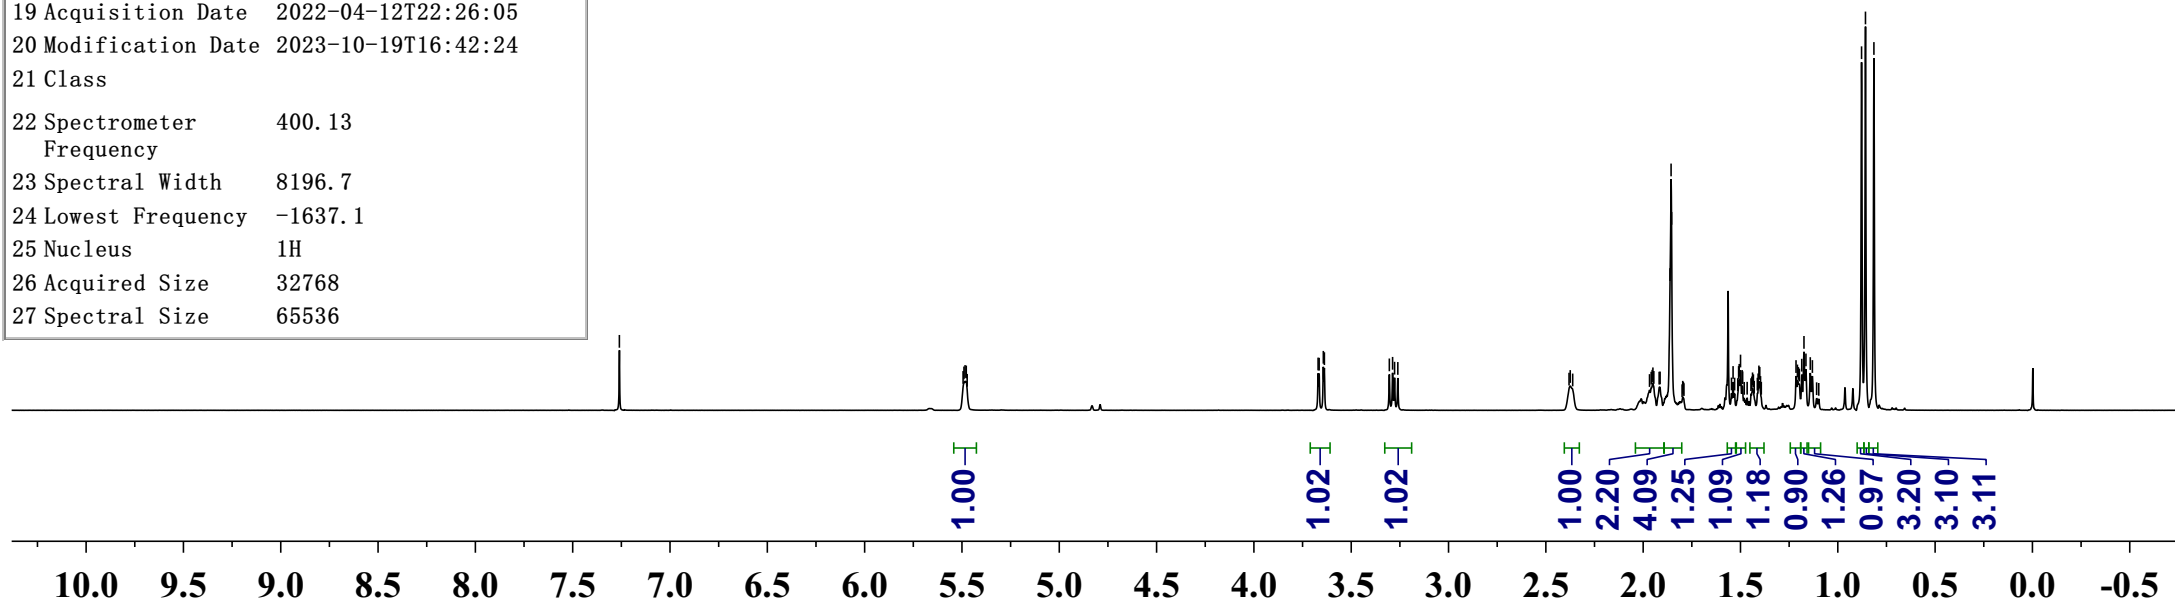

| Parameter                     | Value                                             |
|-------------------------------|---------------------------------------------------|
| 1 Title                       | YYP-D-179-1-2.2.1.1r                              |
| 2 Comment                     |                                                   |
| 3 Origin                      | Bruker BioSpin GmbH                               |
| 4 Owner                       | nmrsu                                             |
| 5 Site                        |                                                   |
| 6 Instrument                  | AVANCE NEO 400 MHZ<br>DIGITAL NMR<br>SPECTROMETER |
| 7 Author                      |                                                   |
| 8 Solvent                     | CDC13                                             |
| 9 Temperature                 | 296.3                                             |
| 10 Pulse Sequence             | zgpg30                                            |
| 11 Experiment                 | 1D                                                |
| 12 Probe                      | Z116098_0723 (PA BBO<br>400S1 BBF-H-D-05 Z SP)    |
| 13 Number of Scans            | 52                                                |
| 14 Receiver Gain              | 58.7                                              |
| 15 Relaxation Delay           | 2.0000                                            |
| 16 Pulse Width                | 9.7000                                            |
| 17 Presaturation<br>Frequency |                                                   |
| 18 Acquisition Time           | 1.3763                                            |
| 19 Acquisition Date           | 2022-04-12T22:30:17                               |
| 20 Modification Date          | 2023-10-19T16:42:25                               |
| 21 Class                      |                                                   |
| 22 Spectrometer<br>Frequency  | 100.61                                            |
| 23 Spectral Width             | 23809.5                                           |
| 24 Lowest Frequency           | -1843.5                                           |
| 25 Nucleus                    | 13C                                               |
| 26 Acquired Size              | 32768                                             |
| 27 Spectral Size              | 32768                                             |

—132.7

—124.1

 77.5  
 77.2  
 76.8

—57.8

—50.1

42.1

39.4

37.9

33.3

33.2

31.6

23.7

22.0

21.9

18.8

14.1

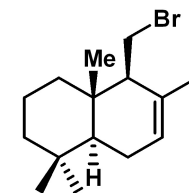

9

210 200 190 180 170 160 150 140 130 120 110 100 90 80 70 60 50 40 30 20 10 0 -10

7.26  
6.98  
6.96  
6.95  
6.94  
6.81  
6.80  
6.79  
6.78  
5.38  
5.37  
5.13  
5.11  
3.48  
3.47  
2.76  
2.73  
2.72  
2.70  
2.62  
2.61  
2.58  
2.57  
2.37  
2.35  
2.02  
2.01  
1.99  
1.97  
1.96  
1.93  
1.93  
1.92  
1.90  
1.90  
1.89  
1.89  
1.85  
1.85  
1.84  
1.84  
1.55  
1.54  
1.54  
1.52  
1.51  
1.50  
1.46  
1.46  
1.46  
1.45  
1.45  
1.43  
1.43  
1.42  
1.41  
1.41  
1.31  
1.29  
1.28  
1.26  
1.26  
1.24  
1.23  
1.20  
1.19  
1.17  
1.16  
1.15  
1.14  
1.11  
1.10  
1.08  
1.07  
0.91  
0.90  
0.88

| Parameter                     | Value                                             |
|-------------------------------|---------------------------------------------------|
| 1 Title                       | YYP-G-094-2-3.3.1.1r                              |
| 2 Comment                     |                                                   |
| 3 Origin                      | Bruker BioSpin GmbH                               |
| 4 Owner                       | nmrsu                                             |
| 5 Site                        |                                                   |
| 6 Instrument                  | AVANCE NEO 400 MHZ<br>DIGITAL NMR<br>SPECTROMETER |
| 7 Author                      |                                                   |
| 8 Solvent                     | CDC13                                             |
| 9 Temperature                 | 298.1                                             |
| 10 Pulse Sequence             | zg30                                              |
| 11 Experiment                 | 1D                                                |
| 12 Probe                      | Z116098_0723 (PA BBO<br>400S1 BBF-H-D-05 Z SP)    |
| 13 Number of Scans            | 7                                                 |
| 14 Receiver Gain              | 101.0                                             |
| 15 Relaxation Delay           | 1.0000                                            |
| 16 Pulse Width                | 8.8100                                            |
| 17 Presaturation<br>Frequency |                                                   |
| 18 Acquisition Time           | 3.9977                                            |
| 19 Acquisition Date           | 2023-10-12T21:58:16                               |
| 20 Modification Date          | 2023-10-13T14:47:19                               |
| 21 Class                      |                                                   |
| 22 Spectrometer<br>Frequency  | 400.13                                            |
| 23 Spectral Width             | 8196.7                                            |
| 24 Lowest Frequency           | -1637.2                                           |
| 25 Nucleus                    | 1H                                                |
| 26 Acquired Size              | 32768                                             |
| 27 Spectral Size              | 65536                                             |

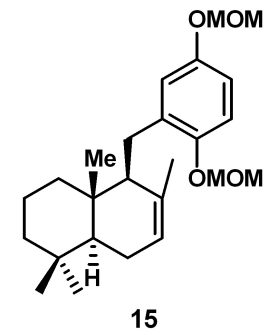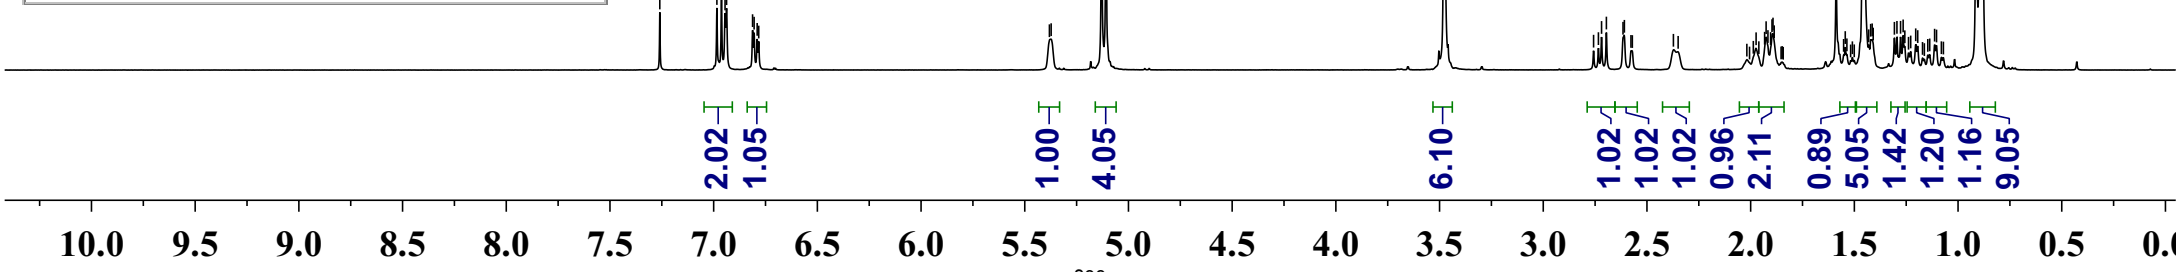

| Parameter                     | Value                                          |
|-------------------------------|------------------------------------------------|
| 1 Title                       | YYP-G-094-2-3.10.1.1r                          |
| 2 Comment                     |                                                |
| 3 Origin                      | Bruker BioSpin GmbH                            |
| 4 Owner                       | nmrsu                                          |
| 5 Site                        |                                                |
| 6 Instrument                  | Avance NEO 600                                 |
| 7 Author                      |                                                |
| 8 Solvent                     | CDC13                                          |
| 9 Temperature                 | 298.3                                          |
| 10 Pulse Sequence             | zgpg30                                         |
| 11 Experiment                 | 1D                                             |
| 12 Probe                      | Z114607_0339 (PA BBO<br>600S3 BBF-H-D-05 Z SP) |
| 13 Number of Scans            | 50                                             |
| 14 Receiver Gain              | 101.0                                          |
| 15 Relaxation Delay           | 2.0000                                         |
| 16 Pulse Width                | 11.5000                                        |
| 17 Presaturation<br>Frequency |                                                |
| 18 Acquisition Time           | 0.9175                                         |
| 19 Acquisition Date           | 2023-10-12T22:10:58                            |
| 20 Modification Date          | 2023-10-13T14:47:19                            |
| 21 Class                      |                                                |
| 22 Spectrometer<br>Frequency  | 150.91                                         |
| 23 Spectral Width             | 35714.3                                        |
| 24 Lowest Frequency           | -2766.4                                        |
| 25 Nucleus                    | 13C                                            |
| 26 Acquired Size              | 32768                                          |
| 27 Spectral Size              | 32768                                          |

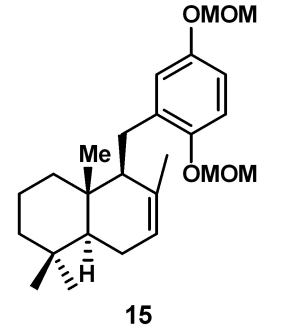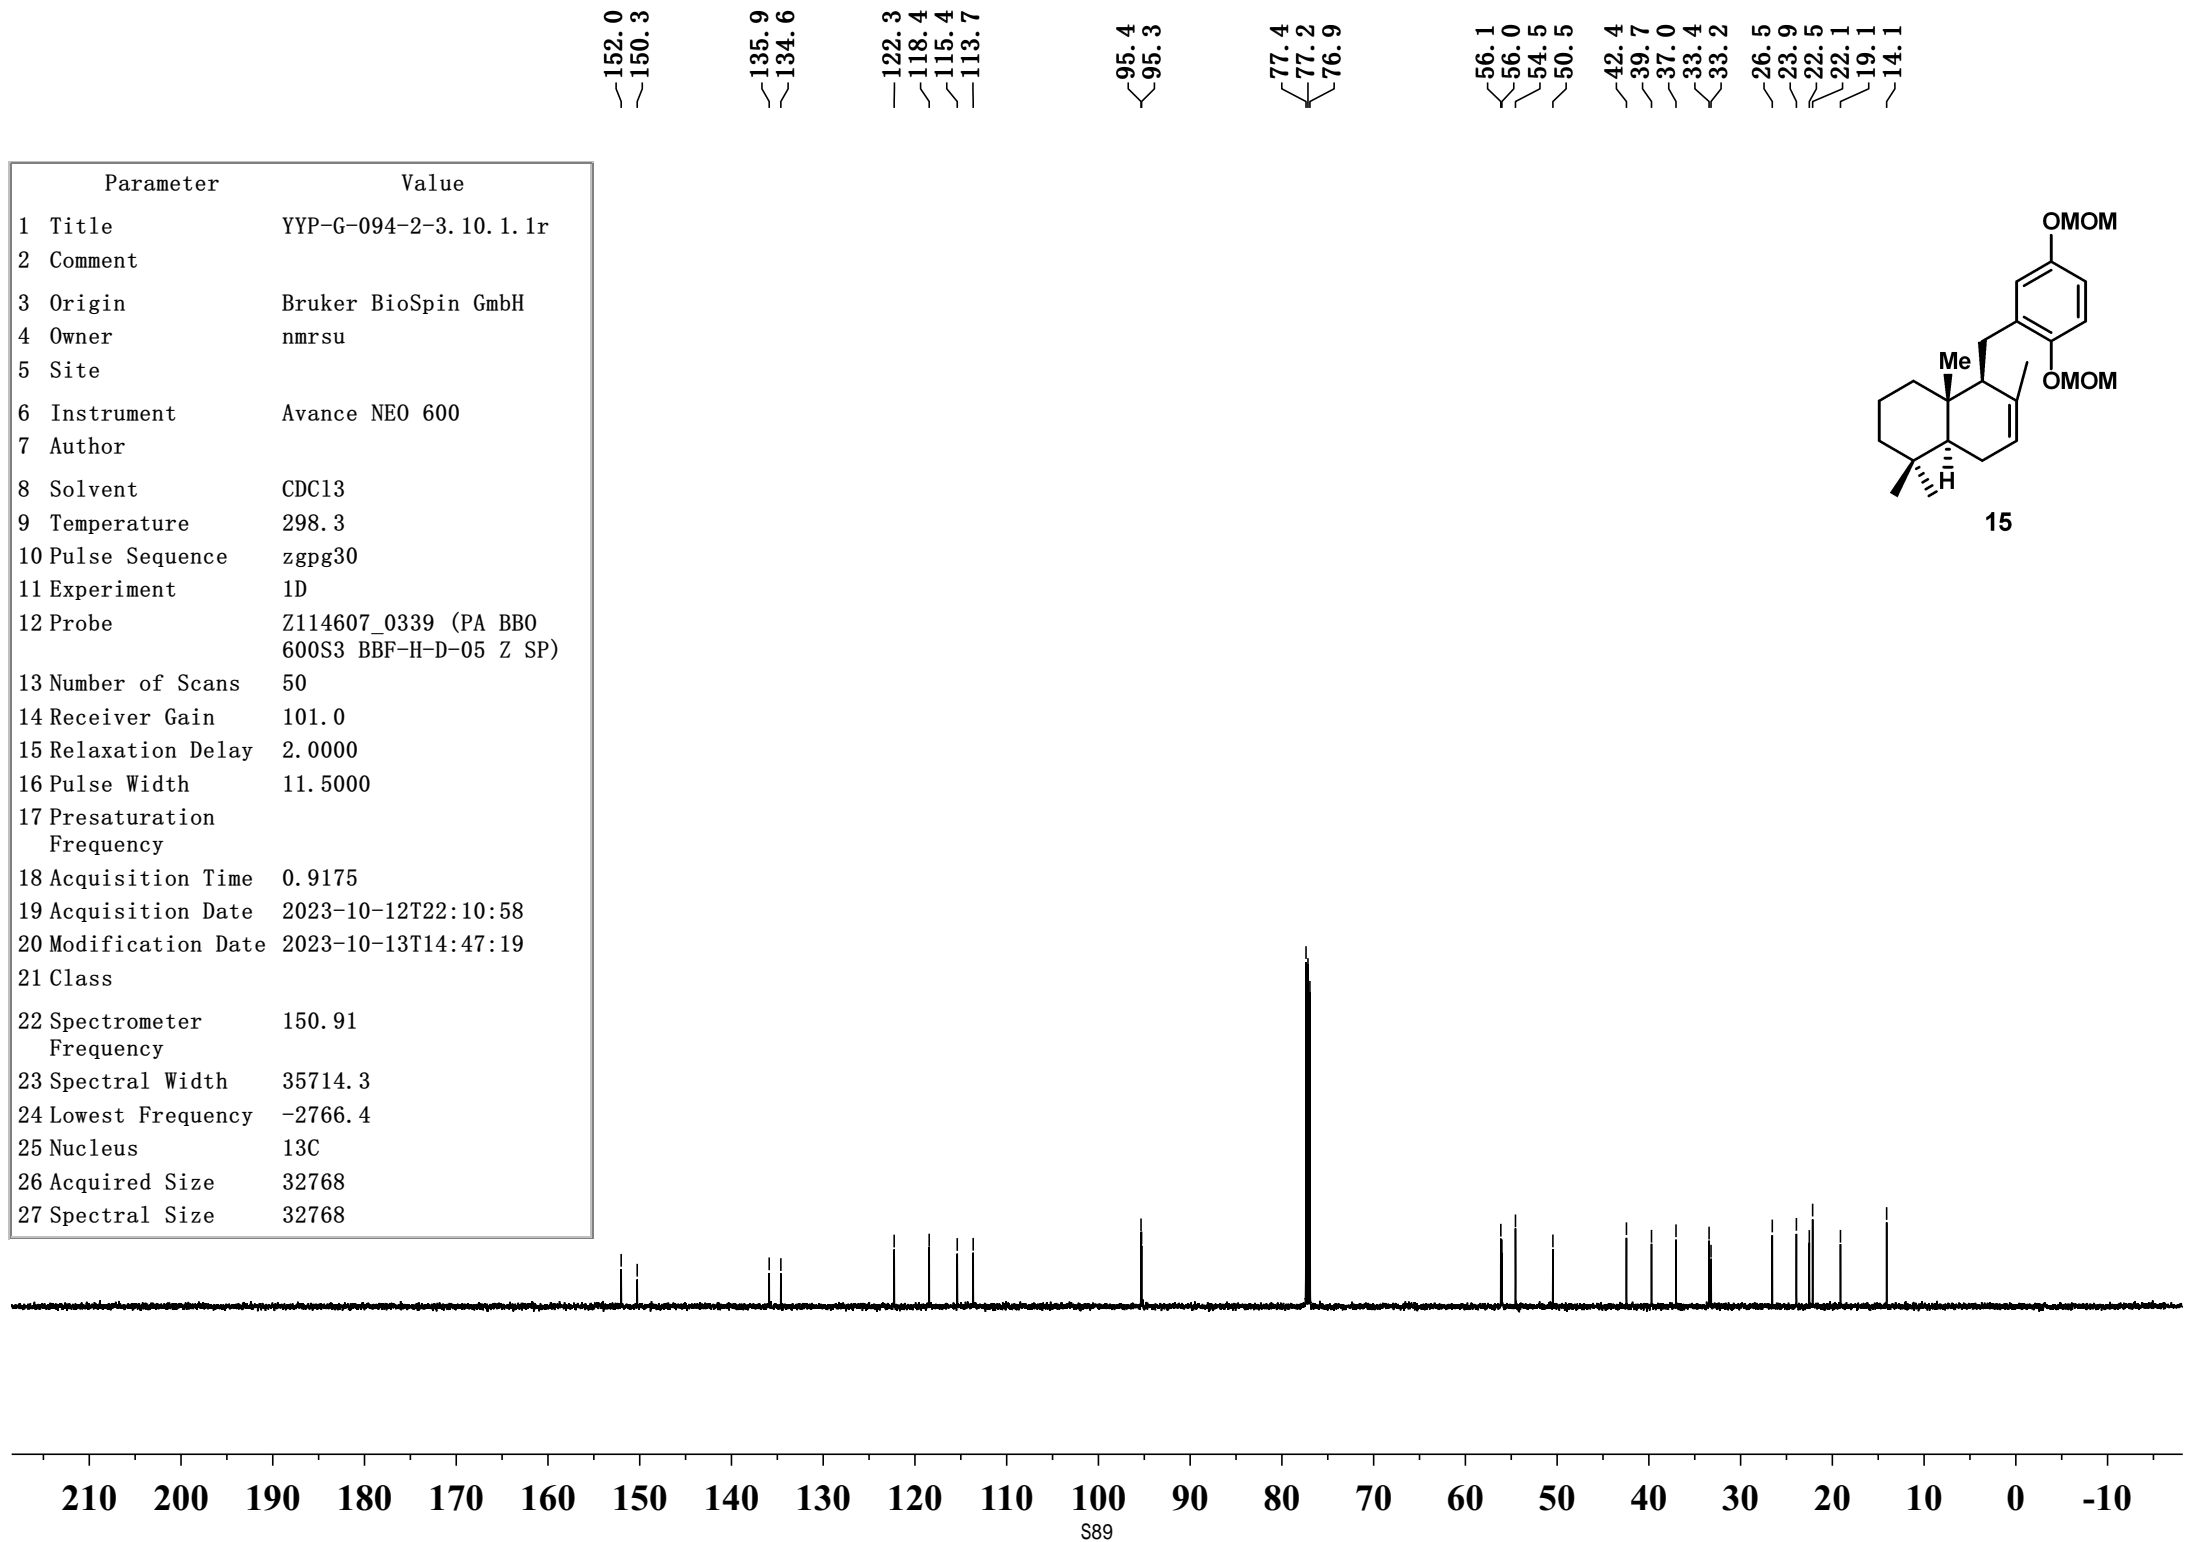

| Parameter                     | Value                                          |
|-------------------------------|------------------------------------------------|
| 1 Title                       | YYP-G-099-1-1.22.1.1r                          |
| 2 Comment                     |                                                |
| 3 Origin                      | Bruker BioSpin GmbH                            |
| 4 Owner                       | nmrsu                                          |
| 5 Site                        |                                                |
| 6 Instrument                  | Avance NEO 600                                 |
| 7 Author                      |                                                |
| 8 Solvent                     | CDC13                                          |
| 9 Temperature                 | 298.1                                          |
| 10 Pulse Sequence             | zg30                                           |
| 11 Experiment                 | 1D                                             |
| 12 Probe                      | Z114607_0339 (PA BBO<br>600S3 BBF-H-D-05 Z SP) |
| 13 Number of Scans            | 8                                              |
| 14 Receiver Gain              | 71.8                                           |
| 15 Relaxation Delay           | 1.0000                                         |
| 16 Pulse Width                | 10.0000                                        |
| 17 Presaturation<br>Frequency |                                                |
| 18 Acquisition Time           | 2.7525                                         |
| 19 Acquisition Date           | 2023-10-14T22:19:53                            |
| 20 Modification Date          | 2023-10-16T08:49:46                            |
| 21 Class                      |                                                |
| 22 Spectrometer<br>Frequency  | 600.15                                         |
| 23 Spectral Width             | 11904.8                                        |
| 24 Lowest Frequency           | -2260.5                                        |
| 25 Nucleus                    | 1H                                             |
| 26 Acquired Size              | 32768                                          |
| 27 Spectral Size              | 65536                                          |

7.26 6.74 6.74 6.61 6.59 6.52 6.52 6.51 6.50 5.39 5.39 5.38 5.38 2.60 2.59 2.58 2.35 2.35 2.01 2.01 1.98 1.92 1.92 1.91 1.91 1.90 1.89 1.89 1.47 1.47 1.47 1.47 1.29 1.29 1.27 1.27 1.22 1.22 1.21 1.21 1.20 1.19 1.17 1.13 1.12 1.11 1.10 1.08 0.91 0.88

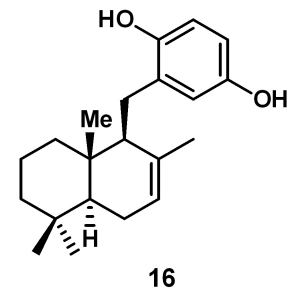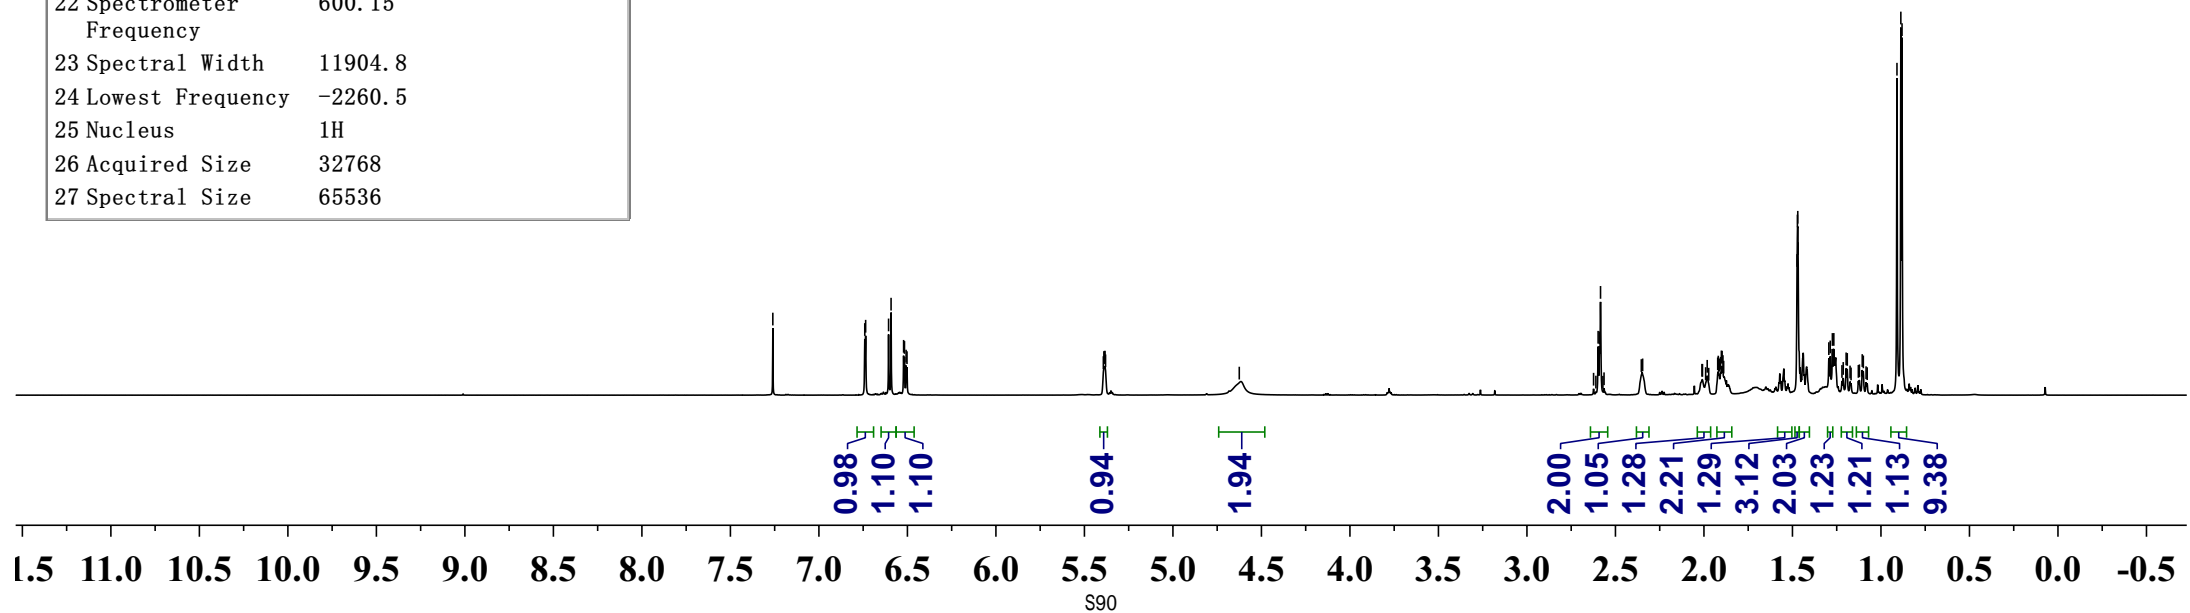

| Parameter                     | Value                                          |
|-------------------------------|------------------------------------------------|
| 1 Title                       | YYP-G-099-1-1. 23. 1. 1r                       |
| 2 Comment                     |                                                |
| 3 Origin                      | Bruker BioSpin GmbH                            |
| 4 Owner                       | nmrsu                                          |
| 5 Site                        |                                                |
| 6 Instrument                  | Avance NEO 600                                 |
| 7 Author                      |                                                |
| 8 Solvent                     | CDC13                                          |
| 9 Temperature                 | 298.2                                          |
| 10 Pulse Sequence             | zgpg30                                         |
| 11 Experiment                 | 1D                                             |
| 12 Probe                      | Z114607_0339 (PA BBO<br>600S3 BBF-H-D-05 Z SP) |
| 13 Number of Scans            | 200                                            |
| 14 Receiver Gain              | 101.0                                          |
| 15 Relaxation Delay           | 2.0000                                         |
| 16 Pulse Width                | 11.5000                                        |
| 17 Presaturation<br>Frequency |                                                |
| 18 Acquisition Time           | 0.9175                                         |
| 19 Acquisition Date           | 2023-10-14T22:30:38                            |
| 20 Modification Date          | 2023-10-16T08:49:46                            |
| 21 Class                      |                                                |
| 22 Spectrometer<br>Frequency  | 150.91                                         |
| 23 Spectral Width             | 35714.3                                        |
| 24 Lowest Frequency           | -2766.4                                        |
| 25 Nucleus                    | 13C                                            |
| 26 Acquired Size              | 32768                                          |
| 27 Spectral Size              | 32768                                          |

~149.4  
~147.2

~135.5  
~131.5

~122.5  
~116.7  
~116.2  
~113.0

~77.4  
~77.2  
~76.9

~54.4  
~50.5

~42.4  
~39.7  
~37.0  
~33.4  
~33.2  
~26.3  
~23.9  
~22.4  
~22.1  
~19.1  
~14.1

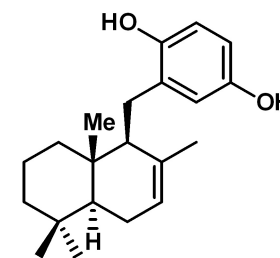

16

210 200 190 180 170 160 150 140 130 120 110 100 90 80 70 60 50 40 30 20 10 0 -10

| Parameter                     | Value                                             |
|-------------------------------|---------------------------------------------------|
| 1 Title                       | YYP-G-101-1-1.1.1.1r                              |
| 2 Comment                     |                                                   |
| 3 Origin                      | Bruker BioSpin GmbH                               |
| 4 Owner                       | nmrsu                                             |
| 5 Site                        |                                                   |
| 6 Instrument                  | AVANCE NEO 400 MHZ<br>DIGITAL NMR<br>SPECTROMETER |
| 7 Author                      |                                                   |
| 8 Solvent                     | CDC13                                             |
| 9 Temperature                 | 298.1                                             |
| 10 Pulse Sequence             | zg30                                              |
| 11 Experiment                 | 1D                                                |
| 12 Probe                      | Z116098_0723 (PA BBO<br>400S1 BBF-H-D-05 Z SP)    |
| 13 Number of Scans            | 8                                                 |
| 14 Receiver Gain              | 101.0                                             |
| 15 Relaxation Delay           | 1.0000                                            |
| 16 Pulse Width                | 8.8100                                            |
| 17 Presaturation<br>Frequency |                                                   |
| 18 Acquisition Time           | 3.9977                                            |
| 19 Acquisition Date           | 2023-10-18T20:33:34                               |
| 20 Modification Date          | 2023-10-18T20:45:39                               |
| 21 Class                      |                                                   |
| 22 Spectrometer<br>Frequency  | 400.13                                            |
| 23 Spectral Width             | 8196.7                                            |
| 24 Lowest Frequency           | -1637.1                                           |
| 25 Nucleus                    | 1H                                                |
| 26 Acquired Size              | 32768                                             |
| 27 Spectral Size              | 65536                                             |

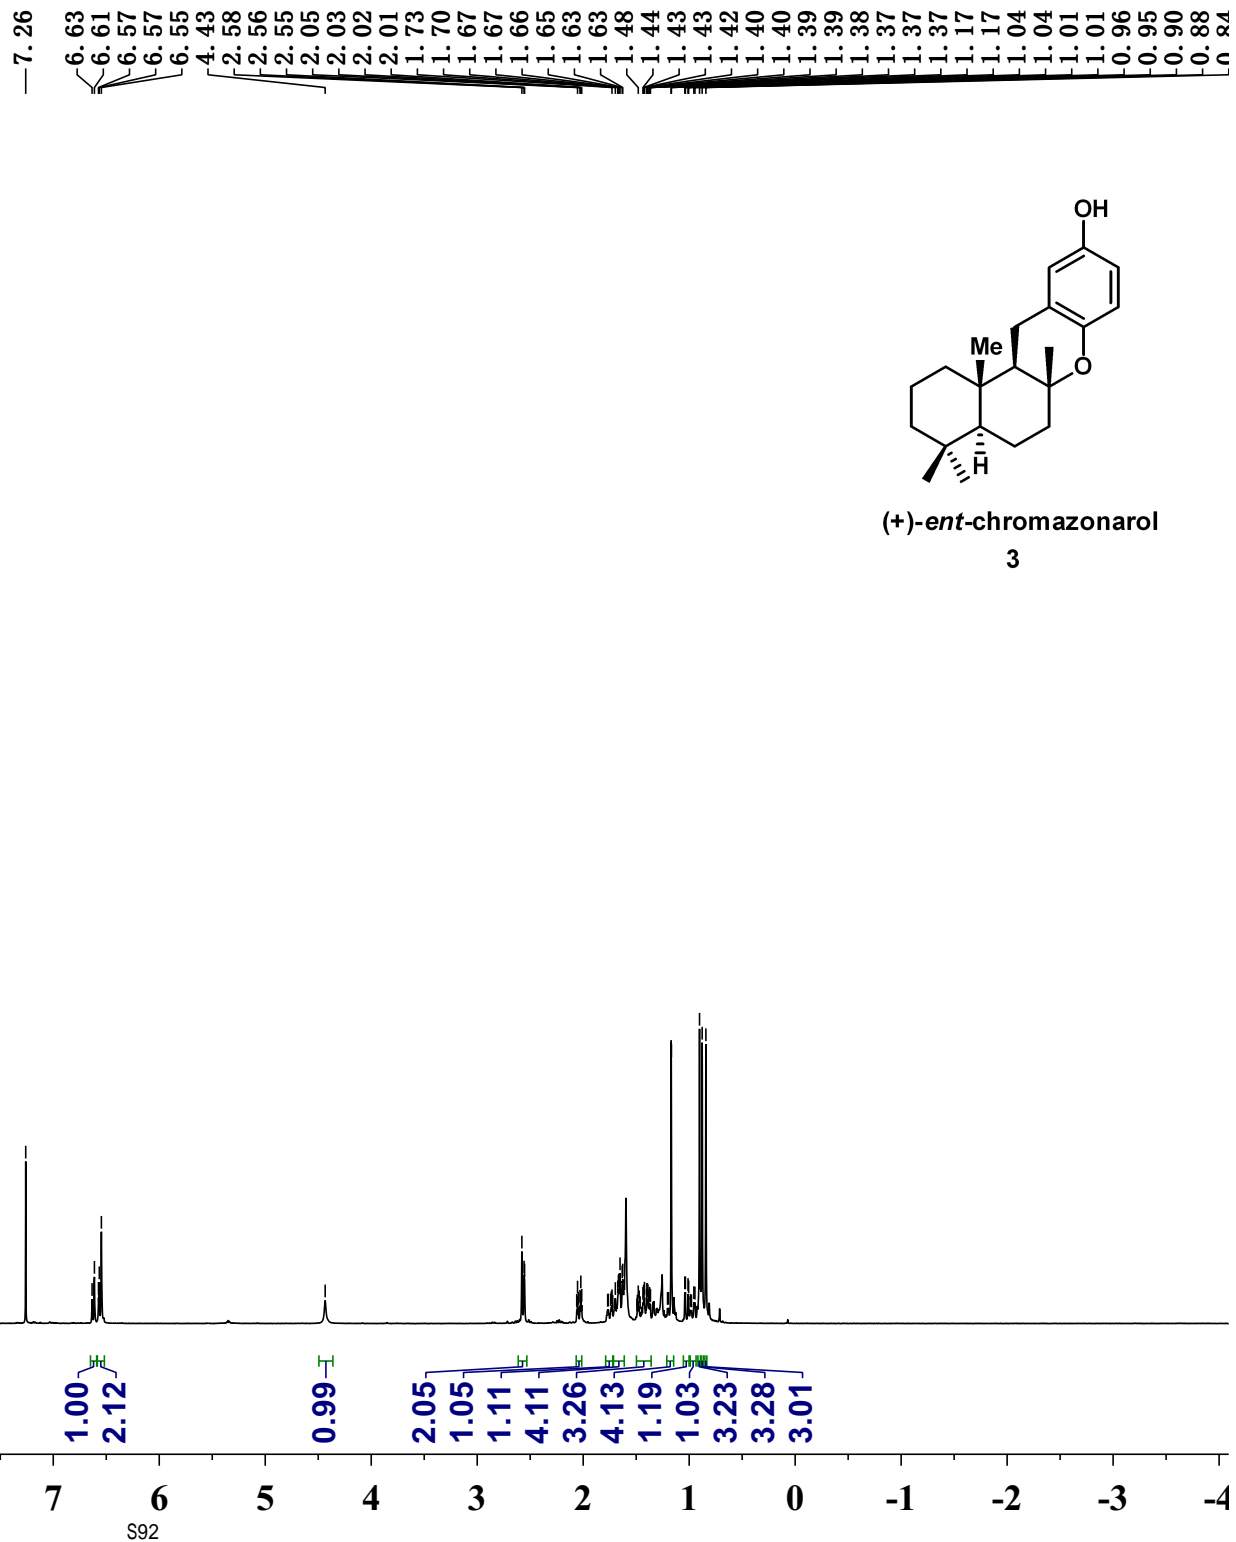



| Parameter                     | Value                                                  |
|-------------------------------|--------------------------------------------------------|
| 1 Title                       | YYP-D-112-1-1.11.1.1r                                  |
| 2 Comment                     |                                                        |
| 3 Origin                      | Bruker BioSpin GmbH                                    |
| 4 Owner                       | nmrsu                                                  |
| 5 Site                        |                                                        |
| 6 Instrument                  | Avance NEO 600                                         |
| 7 Author                      |                                                        |
| 8 Solvent                     | CDC13                                                  |
| 9 Temperature                 | 298.1                                                  |
| 10 Pulse Sequence             | zgpg30                                                 |
| 11 Experiment                 | 1D                                                     |
| 12 Probe                      | Z168773_0027 (CPP1.1<br>BB0 600S3 BB-H&F-D-05 Z<br>XT) |
| 13 Number of Scans            | 102                                                    |
| 14 Receiver Gain              | 101.0                                                  |
| 15 Relaxation Delay           | 2.0000                                                 |
| 16 Pulse Width                | 9.9100                                                 |
| 17 Presaturation<br>Frequency |                                                        |
| 18 Acquisition Time           | 0.9175                                                 |
| 19 Acquisition Date           | 2022-01-10T20:55:01                                    |
| 20 Modification Date          | 2023-10-18T20:07:01                                    |
| 21 Class                      |                                                        |
| 22 Spectrometer<br>Frequency  | 150.91                                                 |
| 23 Spectral Width             | 35714.3                                                |
| 24 Lowest Frequency           | -2745.5                                                |
| 25 Nucleus                    | <sup>13</sup> C                                        |
| 26 Acquired Size              | 32768                                                  |
| 27 Spectral Size              | 32768                                                  |

~148.6  
~147.4

—123.4  
~117.7  
~115.9  
~114.4

77.4  
77.2  
76.9  
76.8

—56.3  
—52.2

42.0  
41.3  
39.4  
36.9  
33.6  
33.3

22.6  
21.8  
20.8  
19.9  
18.7  
15.0

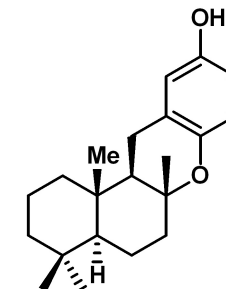

(+)-*ent*-chromazonarol  
3

210 200 190 180 170 160 150 140 130 120 110 100 90 80 70 60 50 40 30 20 10 0 -10

| Parameter                  | Value                                            |
|----------------------------|--------------------------------------------------|
| 1 Title                    | YYP-F-169-1-1.3.1.1r                             |
| 2 Comment                  |                                                  |
| 3 Origin                   | Bruker BioSpin GmbH                              |
| 4 Owner                    | nmrsu                                            |
| 5 Site                     |                                                  |
| 6 Instrument               | Avance Neo 400M                                  |
| 7 Author                   |                                                  |
| 8 Solvent                  | CDC13                                            |
| 9 Temperature              | 298.1                                            |
| 10 Pulse Sequence          | zg30                                             |
| 11 Experiment              | 1D                                               |
| 12 Probe                   | Z163739_0254 (PI HR-BBO400S1-BBF/ H/ D-5.0-Z SP) |
| 13 Number of Scans         | 4                                                |
| 14 Receiver Gain           | 101.0                                            |
| 15 Relaxation Delay        | 1.0000                                           |
| 16 Pulse Width             | 8.0000                                           |
| 17 Presaturation Frequency |                                                  |
| 18 Acquisition Time        | 3.9977                                           |
| 19 Acquisition Date        | 2023-07-05T18:57:34                              |
| 20 Modification Date       | 2023-07-05T19:55:11                              |
| 21 Class                   |                                                  |
| 22 Spectrometer Frequency  | 400.18                                           |
| 23 Spectral Width          | 8196.7                                           |
| 24 Lowest Frequency        | -1636.9                                          |
| 25 Nucleus                 | 1H                                               |
| 26 Acquired Size           | 32768                                            |
| 27 Spectral Size           | 65536                                            |

7.44  
7.44  
7.43  
7.42  
7.42  
7.42  
7.41  
7.41  
7.40  
7.39  
7.39  
7.39  
7.38  
7.37  
7.37  
7.36  
7.36  
7.35  
7.35  
7.34  
7.34  
7.33  
7.33  
7.32  
7.32  
7.31  
7.31  
7.30  
7.26  
6.74

5.10  
5.09

2.33

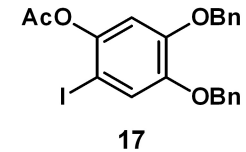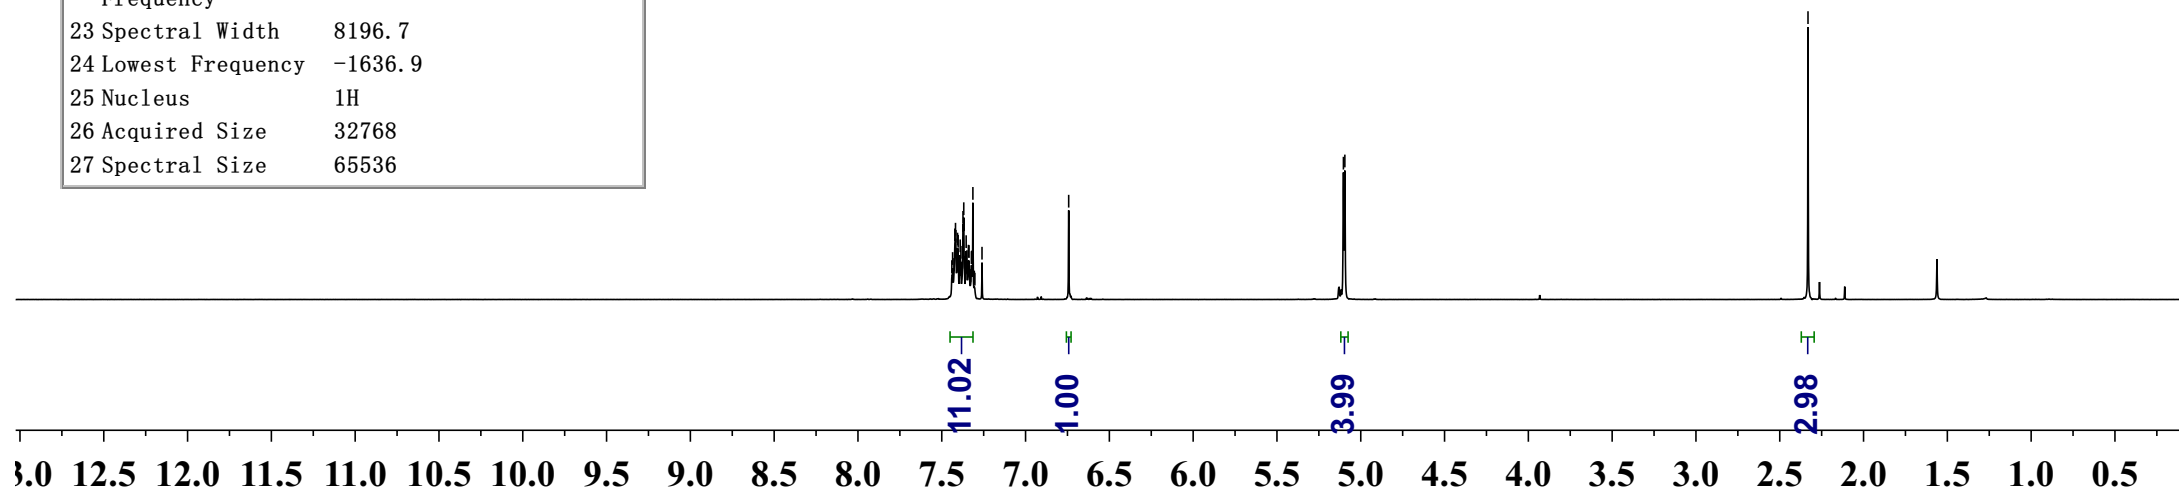

| Parameter                  | Value                                            |
|----------------------------|--------------------------------------------------|
| 1 Title                    | YYP-F-169-1-1.4.1.1r                             |
| 2 Comment                  |                                                  |
| 3 Origin                   | Bruker BioSpin GmbH                              |
| 4 Owner                    | nmrsu                                            |
| 5 Site                     |                                                  |
| 6 Instrument               | Avance Neo 400M                                  |
| 7 Author                   |                                                  |
| 8 Solvent                  | CDC13                                            |
| 9 Temperature              | 298.2                                            |
| 10 Pulse Sequence          | zgpg30                                           |
| 11 Experiment              | 1D                                               |
| 12 Probe                   | Z163739_0254 (PI HR-BB0400S1-BBF/ H/ D-5.0-Z SP) |
| 13 Number of Scans         | 61                                               |
| 14 Receiver Gain           | 36.4                                             |
| 15 Relaxation Delay        | 2.0000                                           |
| 16 Pulse Width             | 7.8100                                           |
| 17 Presaturation Frequency |                                                  |
| 18 Acquisition Time        | 1.3763                                           |
| 19 Acquisition Date        | 2023-07-05T19:02:49                              |
| 20 Modification Date       | 2023-07-05T19:55:11                              |
| 21 Class                   |                                                  |
| 22 Spectrometer Frequency  | 100.63                                           |
| 23 Spectral Width          | 23809.5                                          |
| 24 Lowest Frequency        | -1842.2                                          |
| 25 Nucleus                 | <sup>13</sup> C                                  |
| 26 Acquired Size           | 32768                                            |
| 27 Spectral Size           | 32768                                            |

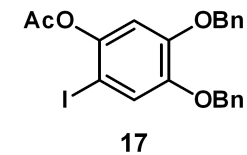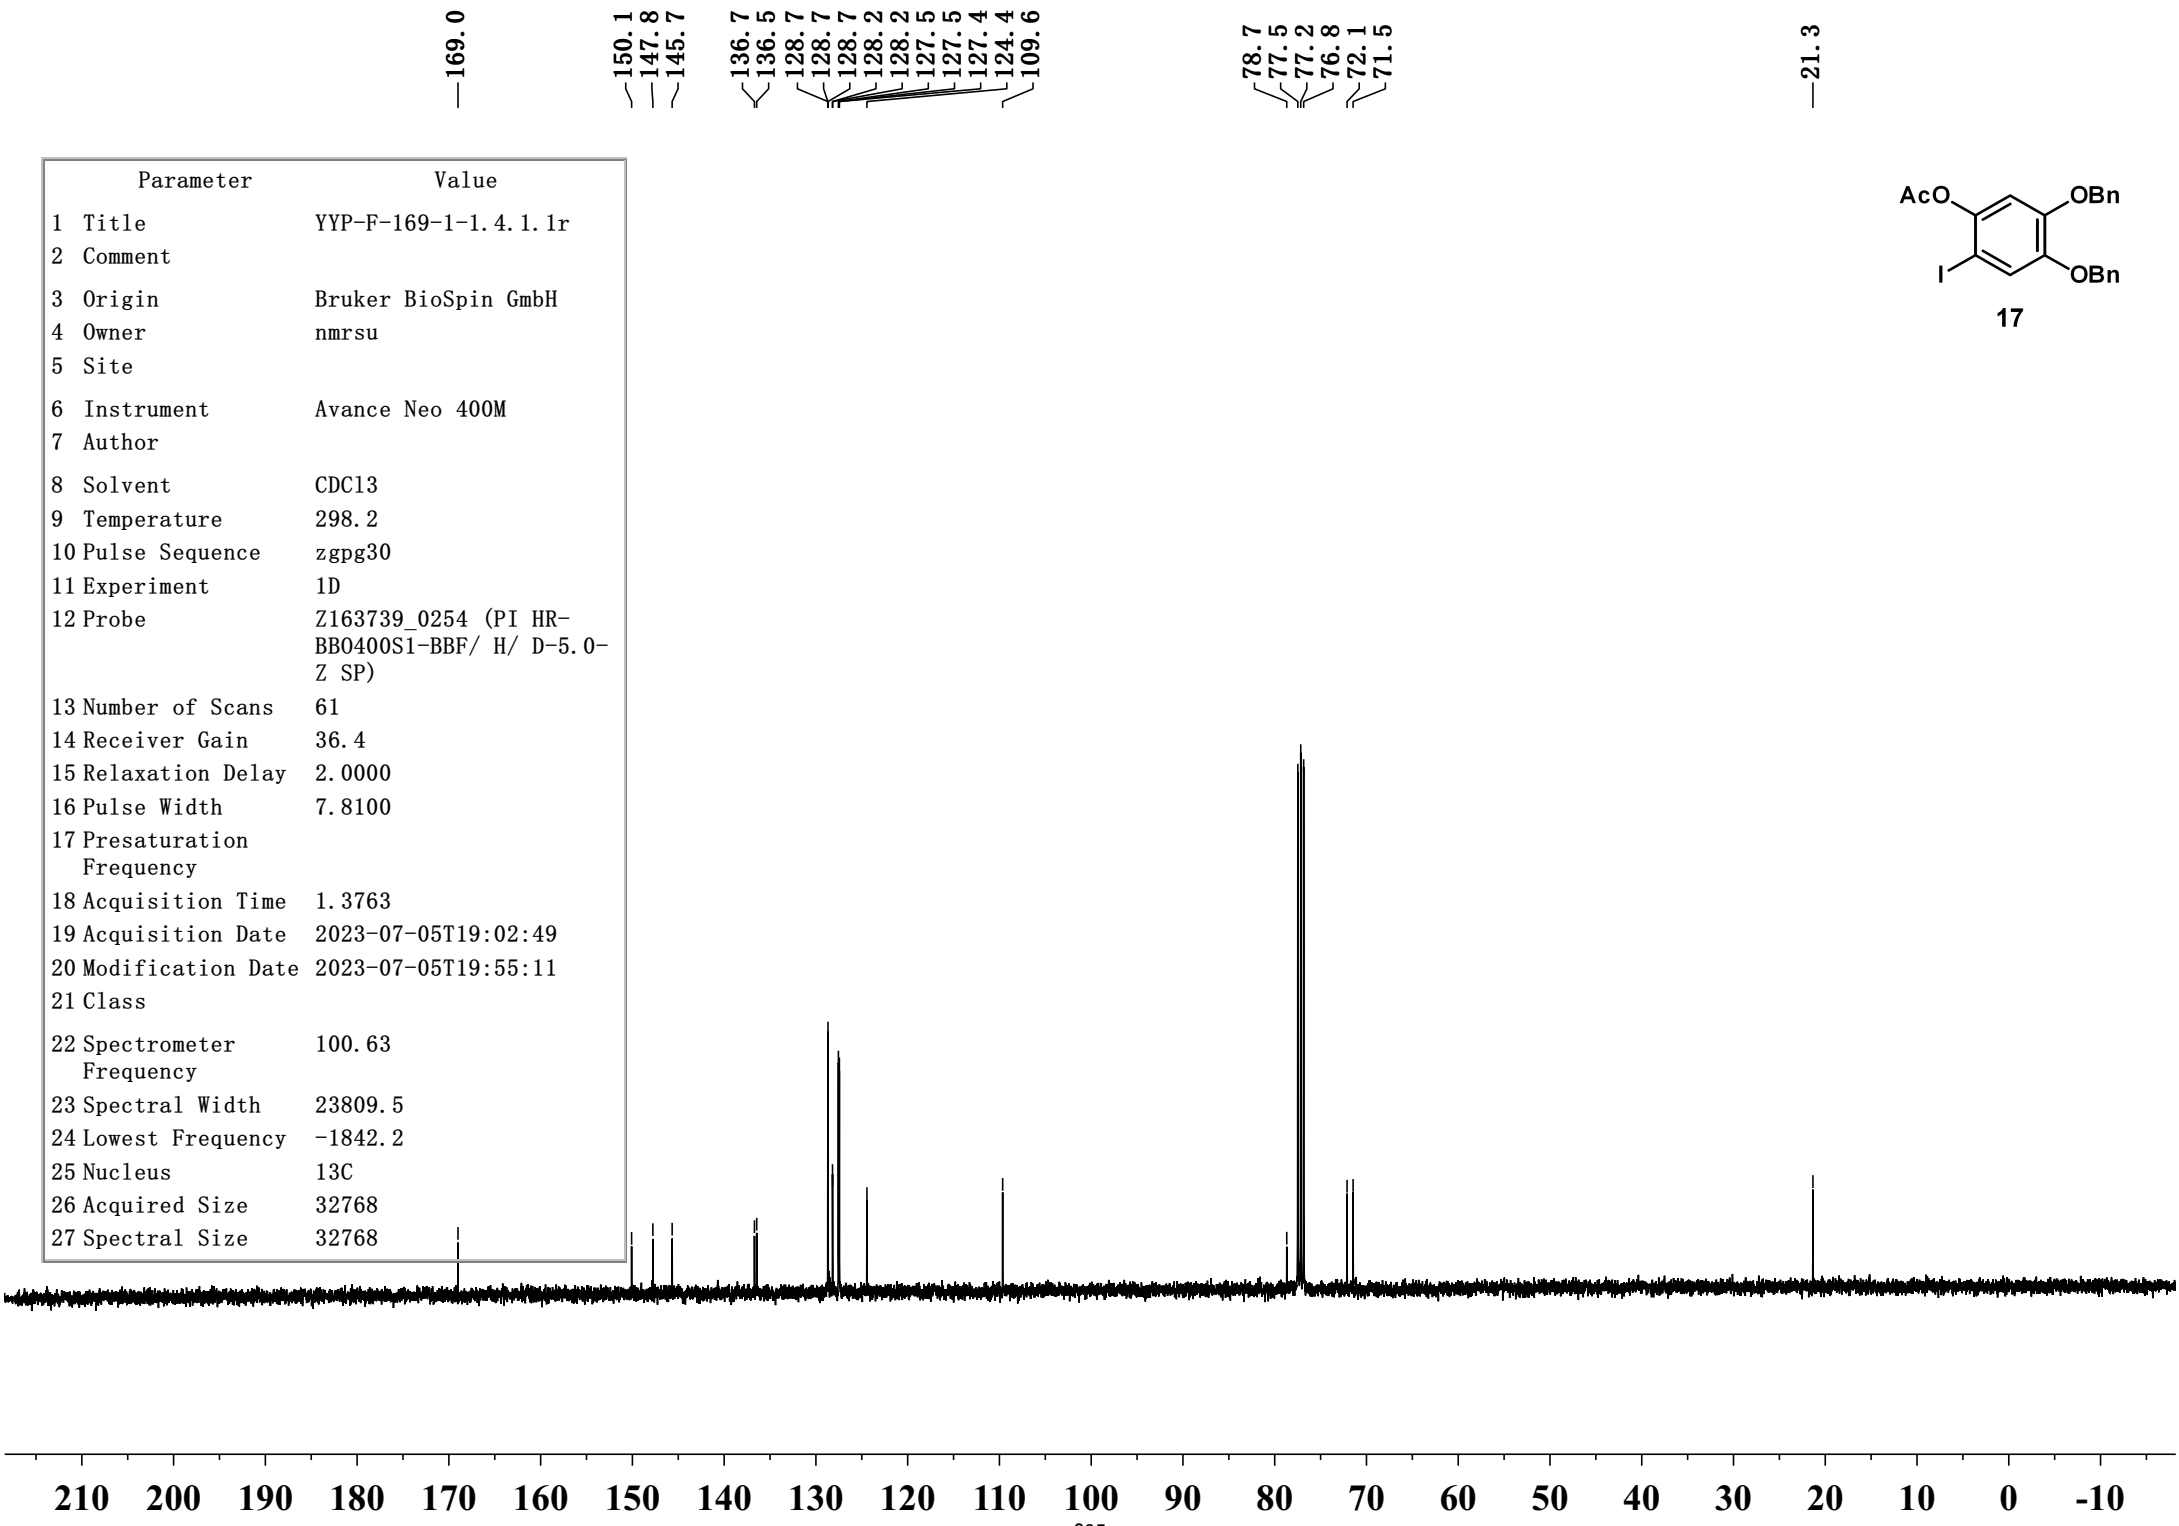

| Parameter                  | Value                                            |
|----------------------------|--------------------------------------------------|
| 1 Title                    | YYP-F-172-1-2.3.1.1r                             |
| 2 Comment                  |                                                  |
| 3 Origin                   | Bruker BioSpin GmbH                              |
| 4 Owner                    | nmrsu                                            |
| 5 Site                     |                                                  |
| 6 Instrument               | Avance Neo 400M                                  |
| 7 Author                   |                                                  |
| 8 Solvent                  | CDC13                                            |
| 9 Temperature              | 298.2                                            |
| 10 Pulse Sequence          | zg30                                             |
| 11 Experiment              | 1D                                               |
| 12 Probe                   | Z163739_0254 (PI HR-BB0400S1-BBF/ H/ D-5.0-Z SP) |
| 13 Number of Scans         | 9                                                |
| 14 Receiver Gain           | 101.0                                            |
| 15 Relaxation Delay        | 1.0000                                           |
| 16 Pulse Width             | 8.0000                                           |
| 17 Presaturation Frequency |                                                  |
| 18 Acquisition Time        | 3.9977                                           |
| 19 Acquisition Date        | 2023-07-06T15:58:03                              |
| 20 Modification Date       | 2023-07-06T16:04:00                              |
| 21 Class                   |                                                  |
| 22 Spectrometer Frequency  | 400.18                                           |
| 23 Spectral Width          | 8196.7                                           |
| 24 Lowest Frequency        | -1636.9                                          |
| 25 Nucleus                 | 1H                                               |
| 26 Acquired Size           | 32768                                            |
| 27 Spectral Size           | 65536                                            |

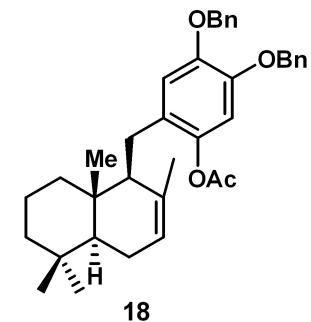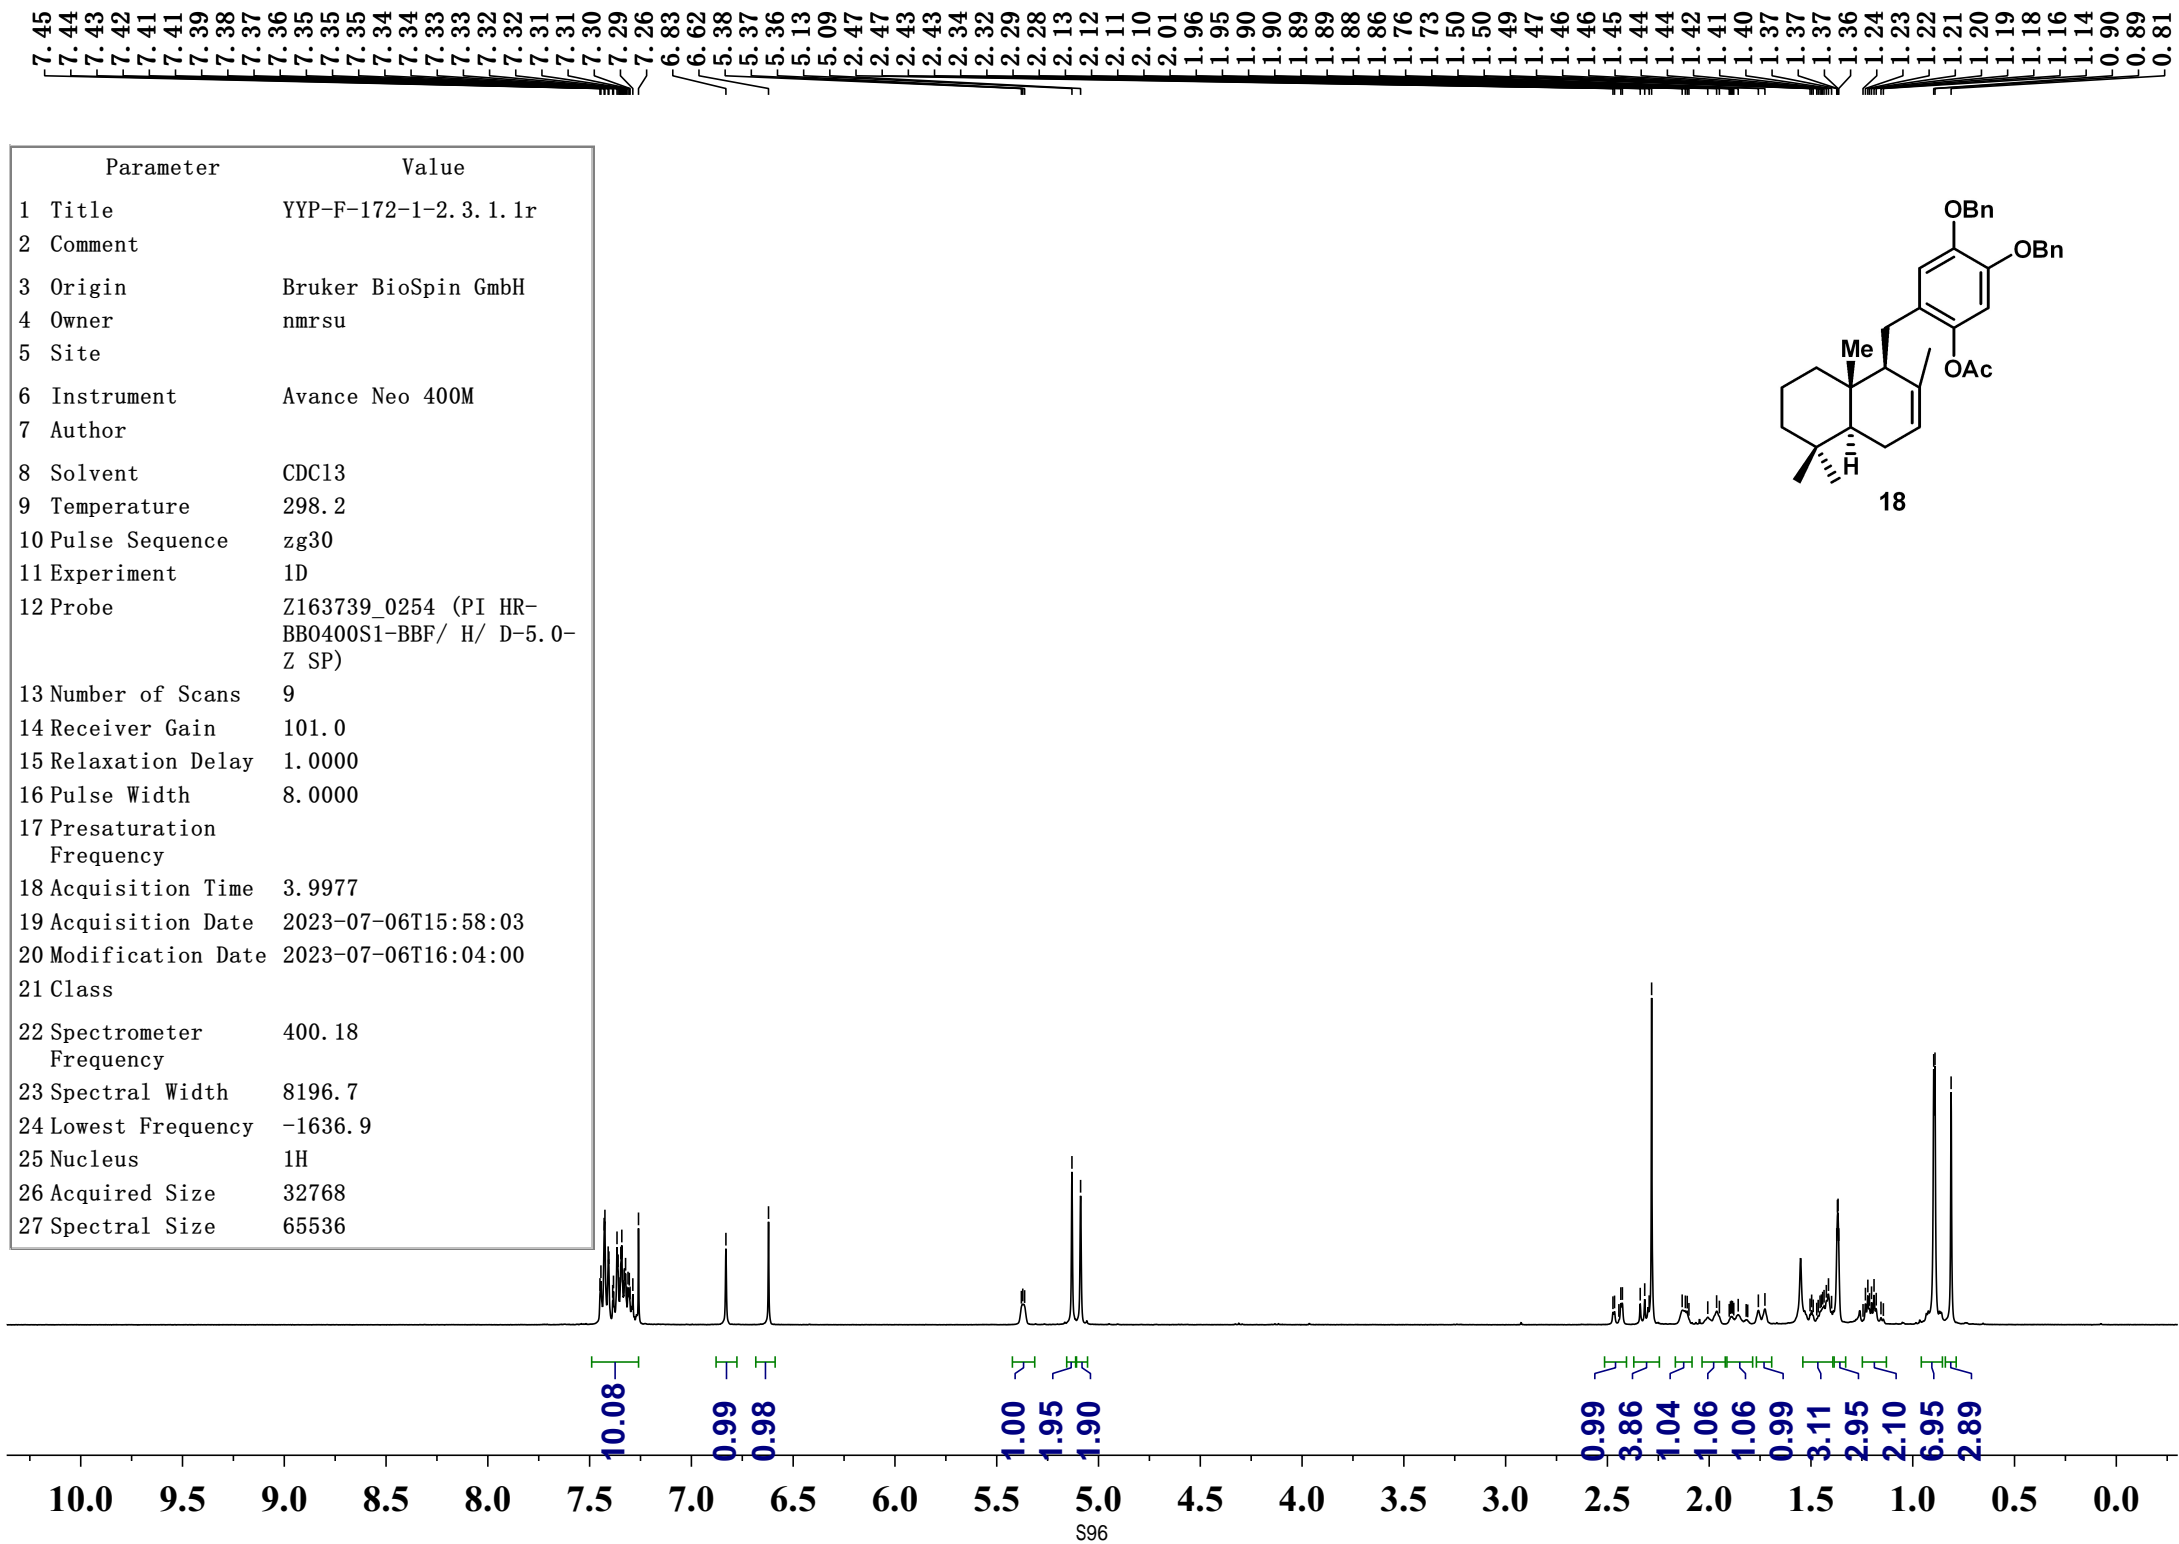

7.45  
7.44  
7.43  
7.42  
7.41  
7.41  
7.39  
7.38  
7.37  
7.36  
7.35  
7.35  
7.35  
7.34  
7.34  
7.33  
7.33  
7.33  
7.32  
7.32  
7.31  
7.31  
7.30  
7.29  
7.26  
6.83  
6.62  
5.38  
5.37  
5.36  
5.13  
5.09  
2.47  
2.47  
2.43  
2.43  
2.34  
2.34  
2.32  
2.29  
2.28  
2.13  
2.12  
2.11  
2.10  
2.01  
1.96  
1.95  
1.90  
1.90  
1.89  
1.89  
1.88  
1.86  
1.76  
1.73  
1.50  
1.50  
1.49  
1.47  
1.47  
1.46  
1.46  
1.45  
1.44  
1.44  
1.42  
1.41  
1.41  
1.40  
1.37  
1.37  
1.37  
1.36  
1.24  
1.23  
1.22  
1.21  
1.21  
1.20  
1.19  
1.18  
1.16  
1.14  
0.90  
0.89  
0.81

| Parameter                  | Value                                            |
|----------------------------|--------------------------------------------------|
| 1 Title                    | YYP-F-172-1-2.11.1.1r                            |
| 2 Comment                  |                                                  |
| 3 Origin                   | Bruker BioSpin GmbH                              |
| 4 Owner                    | nmrsu                                            |
| 5 Site                     |                                                  |
| 6 Instrument               | Avance Neo 400M                                  |
| 7 Author                   |                                                  |
| 8 Solvent                  | CDC13                                            |
| 9 Temperature              | 296.9                                            |
| 10 Pulse Sequence          | zgpg30                                           |
| 11 Experiment              | 1D                                               |
| 12 Probe                   | Z163739_0254 (PI HR-BB0400S1-BBF/ H/ D-5.0-Z SP) |
| 13 Number of Scans         | 77                                               |
| 14 Receiver Gain           | 36.3                                             |
| 15 Relaxation Delay        | 2.0000                                           |
| 16 Pulse Width             | 7.8100                                           |
| 17 Presaturation Frequency |                                                  |
| 18 Acquisition Time        | 1.3763                                           |
| 19 Acquisition Date        | 2023-07-26T09:14:15                              |
| 20 Modification Date       | 2023-07-26T09:33:19                              |
| 21 Class                   |                                                  |
| 22 Spectrometer Frequency  | 100.63                                           |
| 23 Spectral Width          | 23809.5                                          |
| 24 Lowest Frequency        | -1831.3                                          |
| 25 Nucleus                 | 13C                                              |
| 26 Acquired Size           | 32768                                            |
| 27 Spectral Size           | 32768                                            |

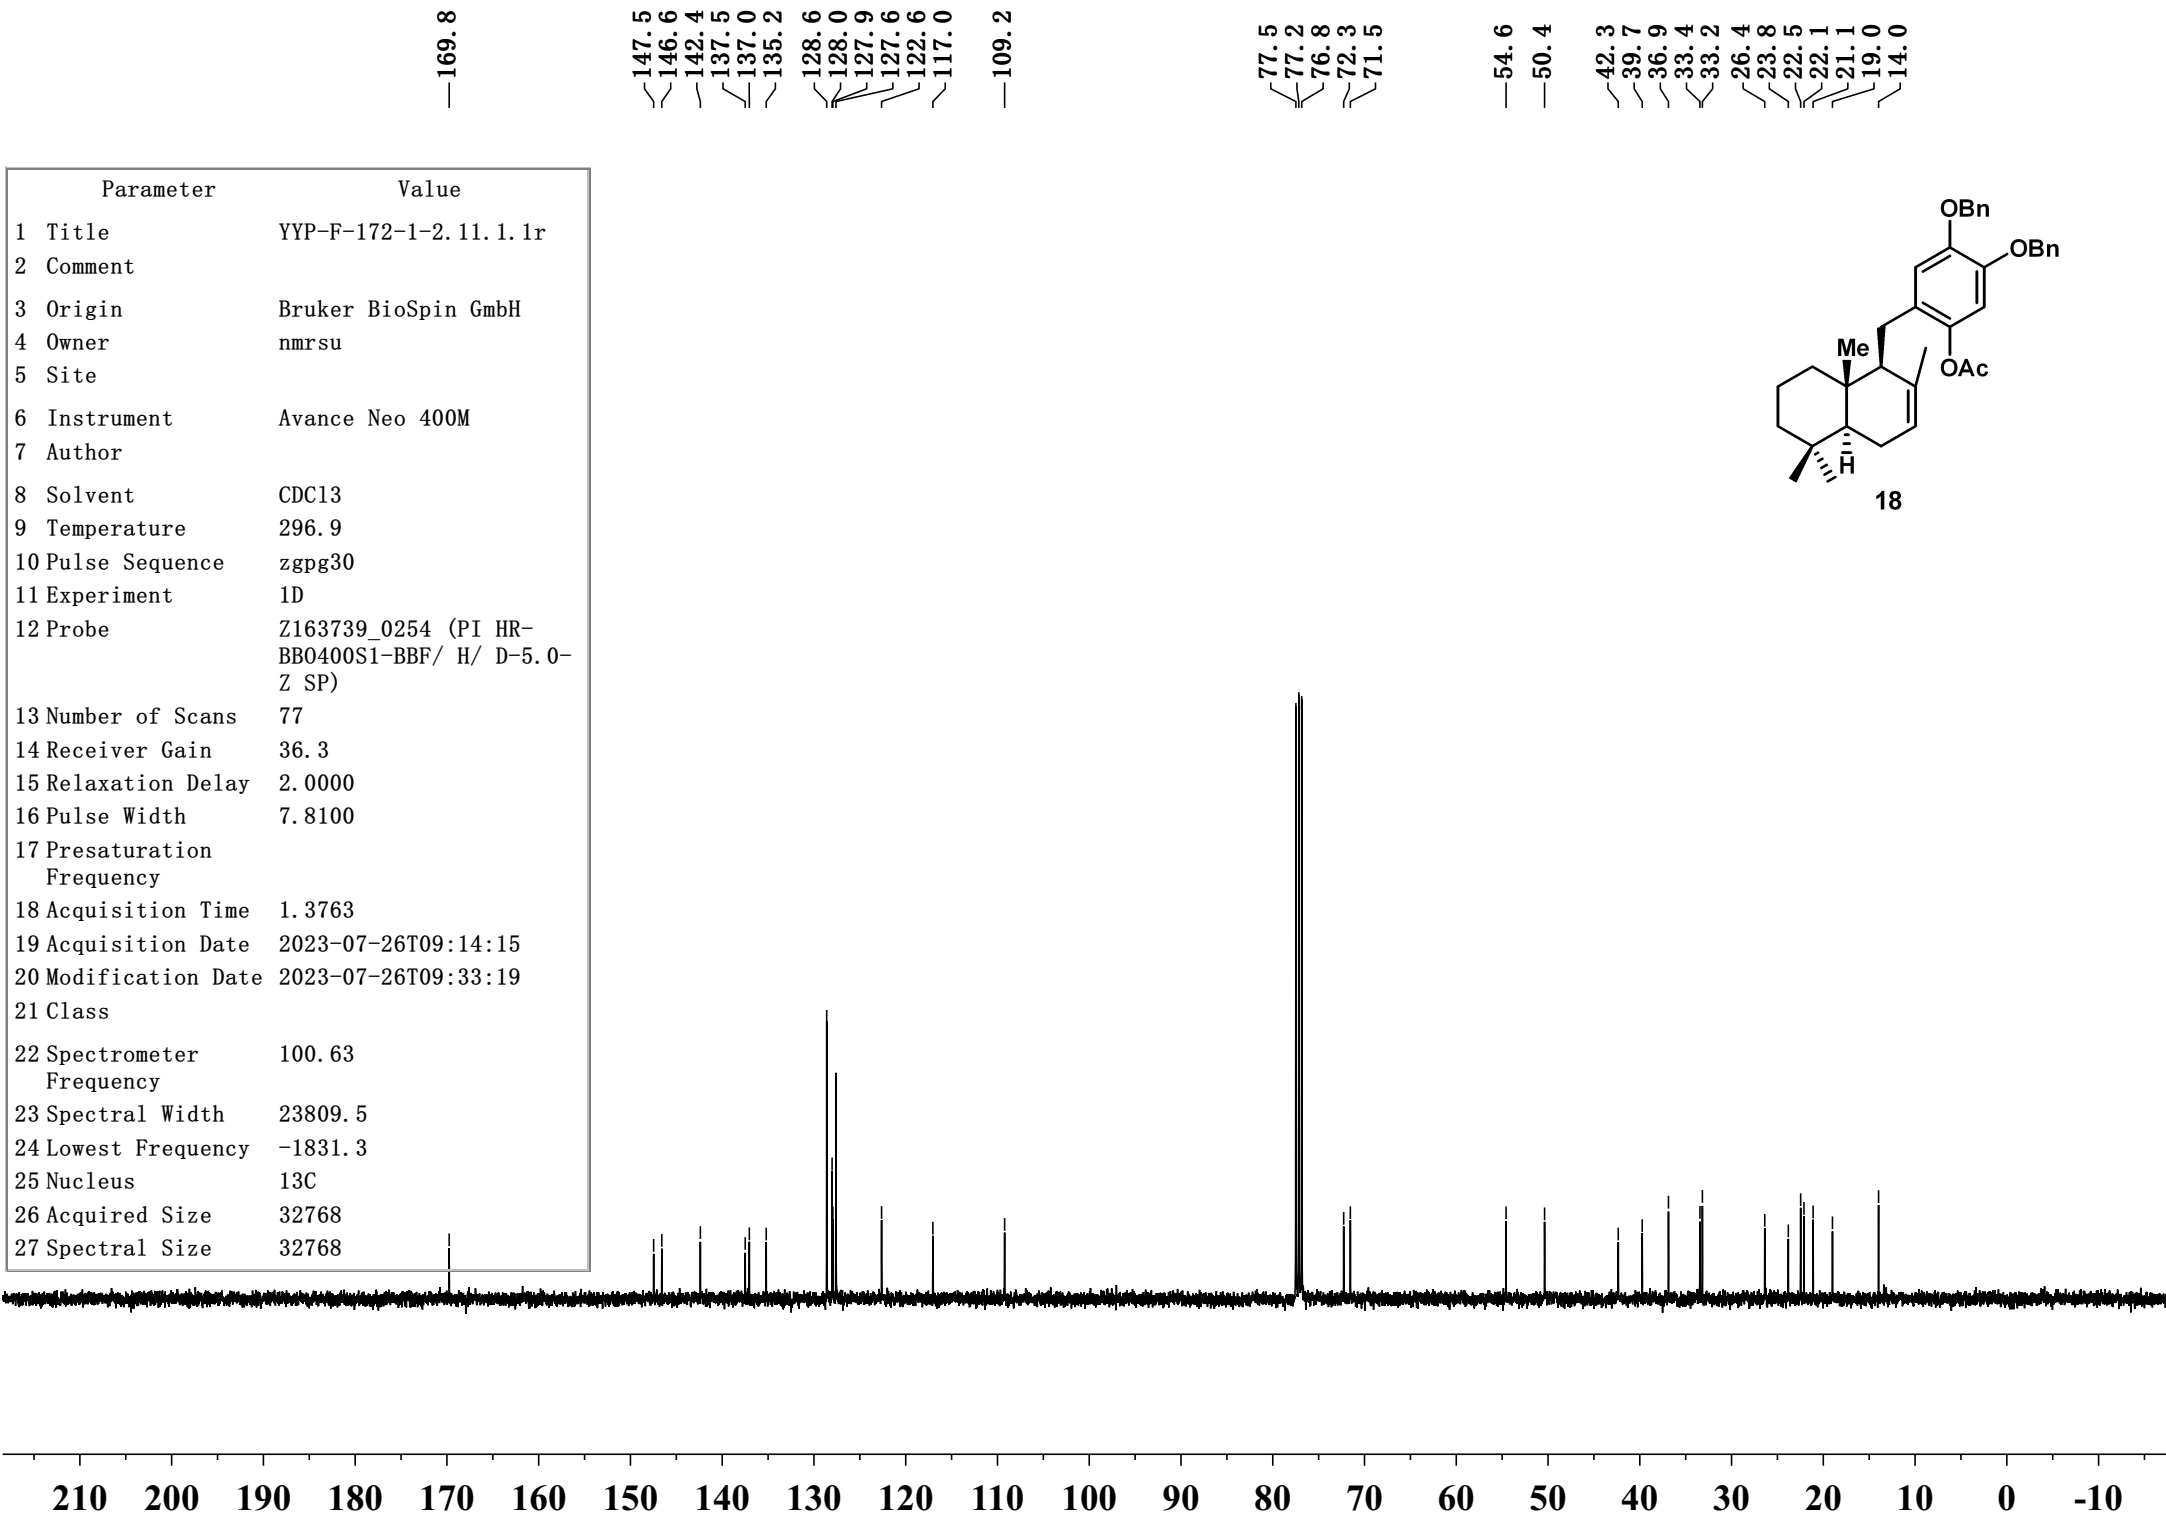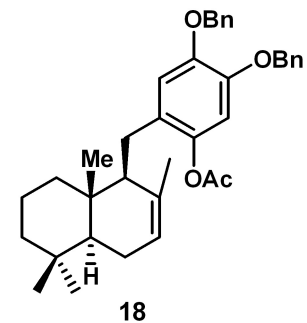

7.43  
7.43  
7.42  
7.42  
7.41  
7.41  
7.40  
7.36  
7.36  
7.35  
7.34  
7.33  
7.33  
7.32  
7.31  
7.26  
6.76  
6.39  
5.38  
5.37  
5.37  
5.37  
5.36  
5.07  
4.67  
2.53  
2.52  
2.49  
2.48  
2.47  
2.45  
2.43  
2.41  
2.19  
2.17  
2.01  
1.99  
1.98  
1.97  
1.96  
1.91  
1.90  
1.88  
1.88  
1.87  
1.87  
1.86  
1.84  
1.83  
1.82  
1.82  
1.57  
1.56  
1.55  
1.53  
1.53  
1.52  
1.49  
1.45  
1.45  
1.42  
1.41  
1.41  
1.40  
1.26  
1.25  
1.24  
1.23  
1.22  
1.21  
1.20  
1.20  
1.02  
0.99  
0.99  
0.98  
0.96  
0.95  
0.91  
0.90  
0.85

| Parameter                  | Value                                            |
|----------------------------|--------------------------------------------------|
| 1 Title                    | YYP-F-173-1-1.3.1.1r                             |
| 2 Comment                  |                                                  |
| 3 Origin                   | Bruker BioSpin GmbH                              |
| 4 Owner                    | nmrsu                                            |
| 5 Site                     |                                                  |
| 6 Instrument               | Avance Neo 400M                                  |
| 7 Author                   |                                                  |
| 8 Solvent                  | CDC13                                            |
| 9 Temperature              | 297.1                                            |
| 10 Pulse Sequence          | zg30                                             |
| 11 Experiment              | 1D                                               |
| 12 Probe                   | Z163739_0254 (PI HR-BB0400S1-BBF/ H/ D-5.0-Z SP) |
| 13 Number of Scans         | 4                                                |
| 14 Receiver Gain           | 93.9                                             |
| 15 Relaxation Delay        | 1.0000                                           |
| 16 Pulse Width             | 8.0000                                           |
| 17 Presaturation Frequency |                                                  |
| 18 Acquisition Time        | 3.9977                                           |
| 19 Acquisition Date        | 2023-08-05T17:14:15                              |
| 20 Modification Date       | 2023-08-05T17:47:37                              |
| 21 Class                   |                                                  |
| 22 Spectrometer Frequency  | 400.18                                           |
| 23 Spectral Width          | 8196.7                                           |
| 24 Lowest Frequency        | -1636.5                                          |
| 25 Nucleus                 | 1H                                               |
| 26 Acquired Size           | 32768                                            |
| 27 Spectral Size           | 65536                                            |

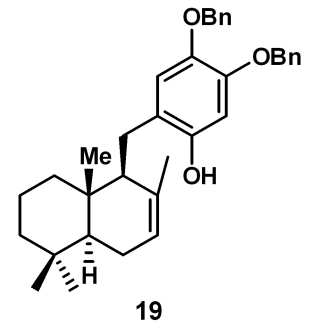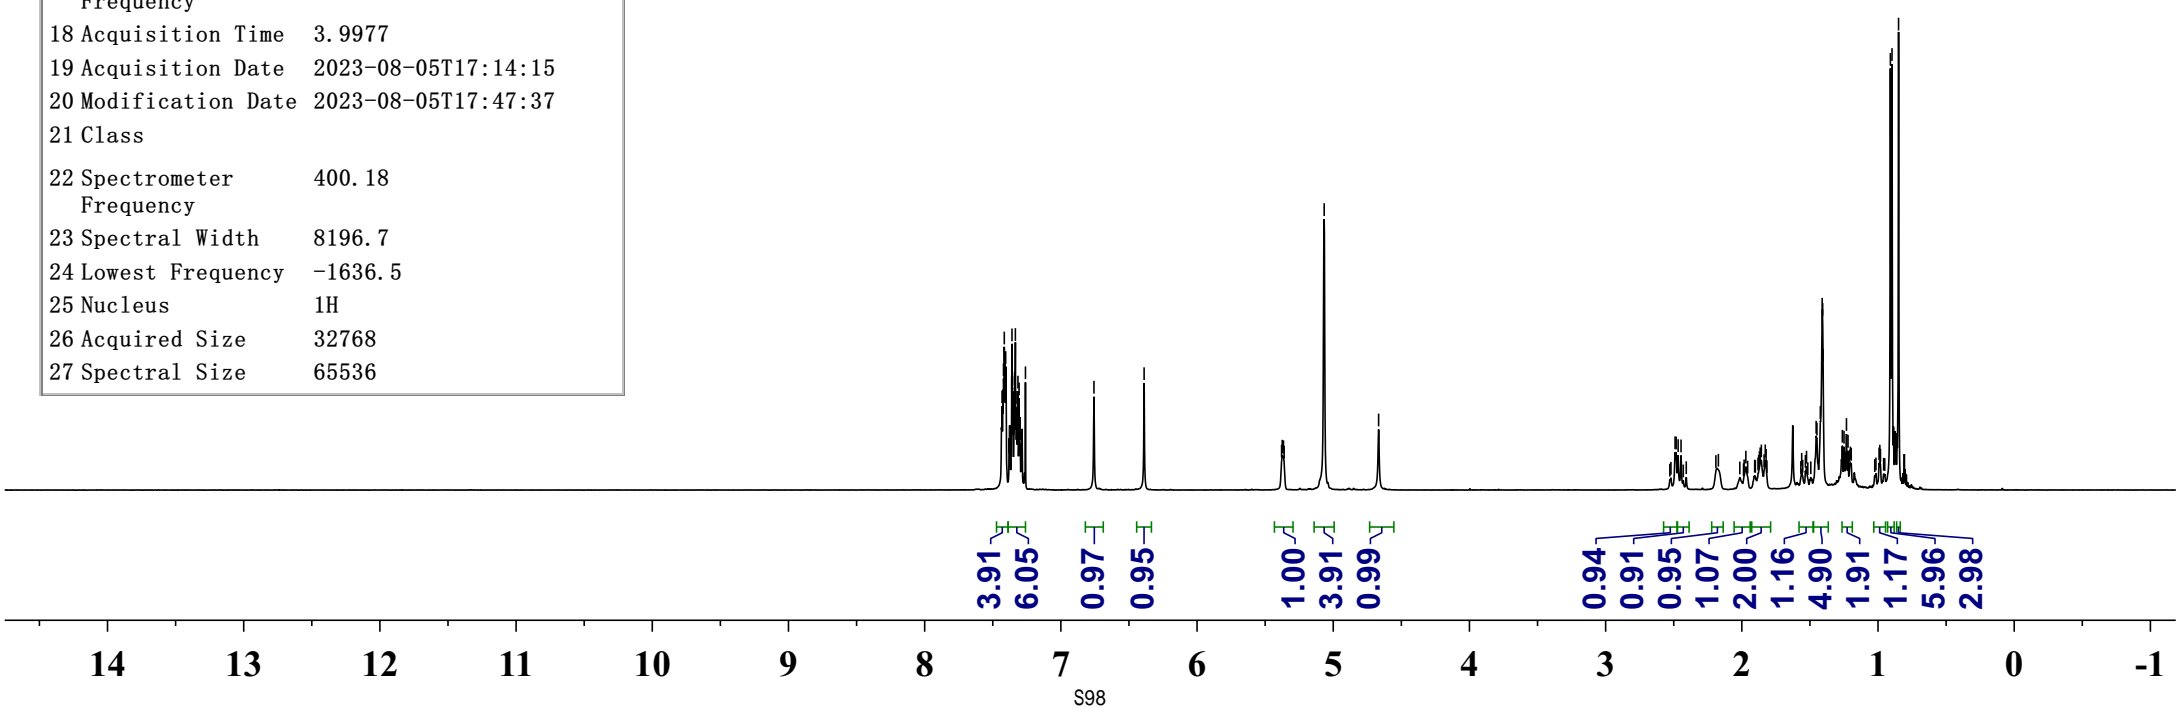

| Parameter                     | Value                                          |
|-------------------------------|------------------------------------------------|
| 1 Title                       | YYP-F-173-1-1. 10. 1. 1r                       |
| 2 Comment                     |                                                |
| 3 Origin                      | Bruker BioSpin GmbH                            |
| 4 Owner                       | nmrsu                                          |
| 5 Site                        |                                                |
| 6 Instrument                  | Avance NEO 600                                 |
| 7 Author                      |                                                |
| 8 Solvent                     | CDC13                                          |
| 9 Temperature                 | 298.1                                          |
| 10 Pulse Sequence             | zgpg30                                         |
| 11 Experiment                 | 1D                                             |
| 12 Probe                      | Z114607_0339 (PA BBO<br>600S3 BBF-H-D-05 Z SP) |
| 13 Number of Scans            | 200                                            |
| 14 Receiver Gain              | 101.0                                          |
| 15 Relaxation Delay           | 2.0000                                         |
| 16 Pulse Width                | 11.5000                                        |
| 17 Presaturation<br>Frequency |                                                |
| 18 Acquisition Time           | 0.9175                                         |
| 19 Acquisition Date           | 2023-08-05T18:06:39                            |
| 20 Modification Date          | 2023-08-05T19:48:52                            |
| 21 Class                      |                                                |
| 22 Spectrometer<br>Frequency  | 150.91                                         |
| 23 Spectral Width             | 35714.3                                        |
| 24 Lowest Frequency           | -2766.4                                        |
| 25 Nucleus                    | <sup>13</sup> C                                |
| 26 Acquired Size              | 32768                                          |
| 27 Spectral Size              | 32768                                          |

148.0  
147.9  
142.5  
137.8  
137.3  
135.5  
128.6  
128.5  
128.0  
127.9  
127.9  
127.5  
122.4  
121.8  
119.4  
103.8

77.4  
77.2  
76.9  
73.3  
71.5

54.4  
50.4

42.4  
39.7  
37.0  
33.4  
33.2  
25.9  
23.9  
22.4  
22.1  
19.1  
14.0

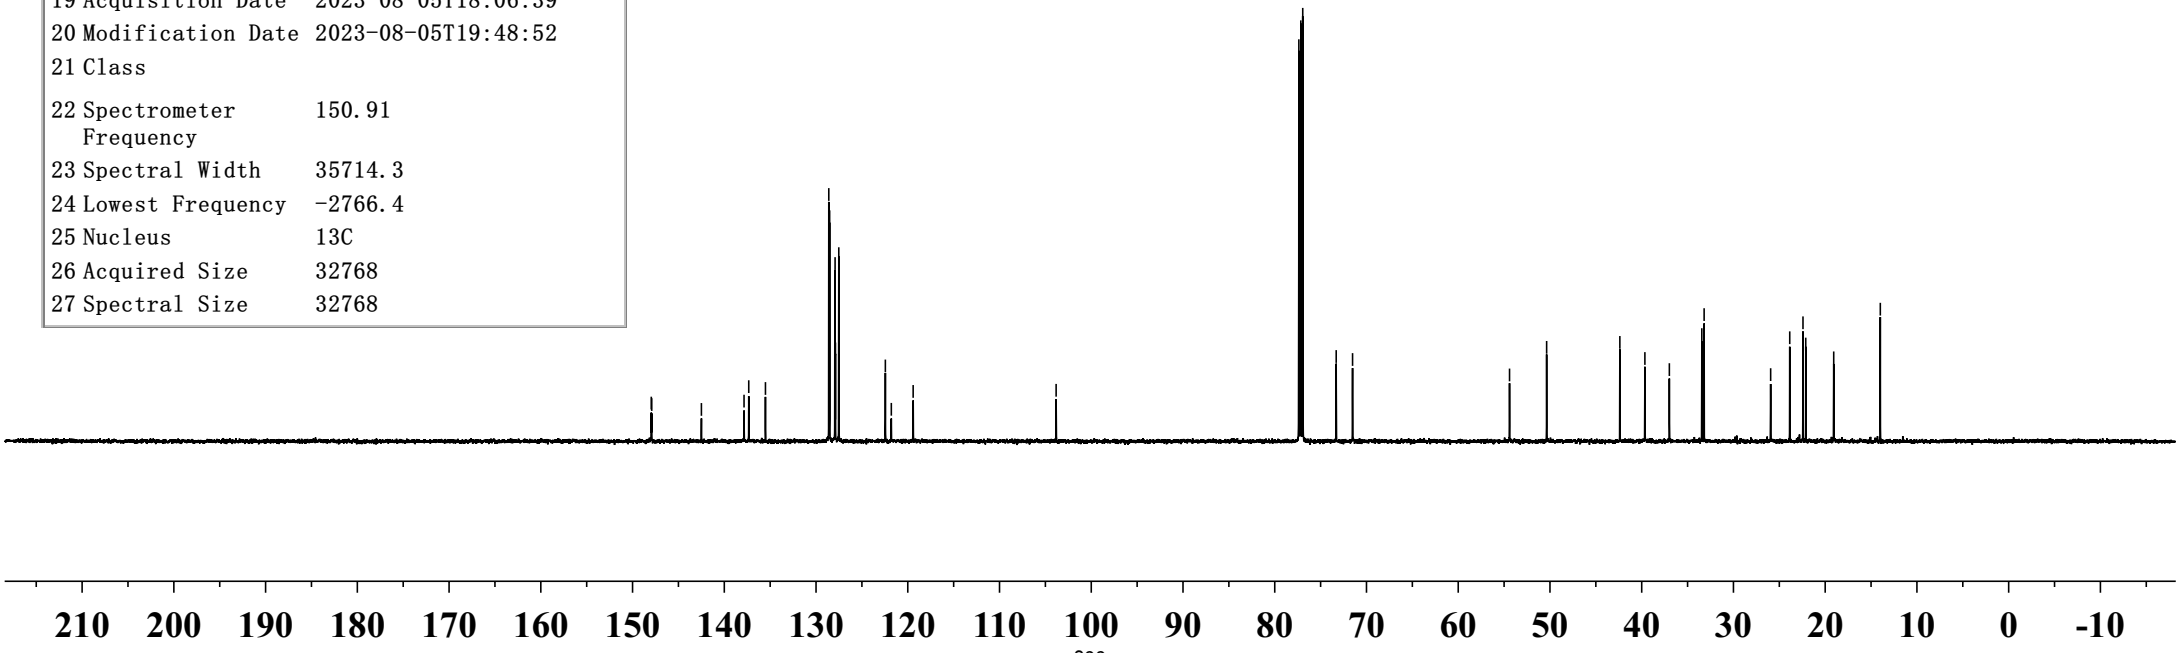

| Parameter                     | Value                                          |
|-------------------------------|------------------------------------------------|
| 1 Title                       | YYP-F-174-1-1.12.1.1r                          |
| 2 Comment                     |                                                |
| 3 Origin                      | Bruker BioSpin GmbH                            |
| 4 Owner                       | nmrsu                                          |
| 5 Site                        |                                                |
| 6 Instrument                  | Avance NEO 600                                 |
| 7 Author                      |                                                |
| 8 Solvent                     | CDC13                                          |
| 9 Temperature                 | 298.1                                          |
| 10 Pulse Sequence             | zg30                                           |
| 11 Experiment                 | 1D                                             |
| 12 Probe                      | Z114607_0339 (PA BBO<br>600S3 BBF-H-D-05 Z SP) |
| 13 Number of Scans            | 5                                              |
| 14 Receiver Gain              | 64.0                                           |
| 15 Relaxation Delay           | 1.0000                                         |
| 16 Pulse Width                | 10.0000                                        |
| 17 Presaturation<br>Frequency |                                                |
| 18 Acquisition Time           | 2.7525                                         |
| 19 Acquisition Date           | 2023-08-08T21:51:24                            |
| 20 Modification Date          | 2023-08-09T09:13:43                            |
| 21 Class                      |                                                |
| 22 Spectrometer<br>Frequency  | 600.15                                         |
| 23 Spectral Width             | 11904.8                                        |
| 24 Lowest Frequency           | -2261.0                                        |
| 25 Nucleus                    | <sup>1</sup> H                                 |
| 26 Acquired Size              | 32768                                          |
| 27 Spectral Size              | 65536                                          |

7.45  
7.43  
7.37  
7.36  
7.35  
7.34  
7.26  
6.67  
6.44

5.08  
5.07  
5.05  
2.51  
2.49  
2.05  
2.03  
1.77  
1.74  
1.69  
1.67  
1.67  
1.66  
1.65  
1.62  
1.60  
1.48  
1.45  
1.43  
1.41  
1.40  
1.37  
1.37  
1.18  
1.14  
1.13  
1.11  
1.03  
1.01  
0.98  
0.95  
0.95  
0.91  
0.88  
0.85

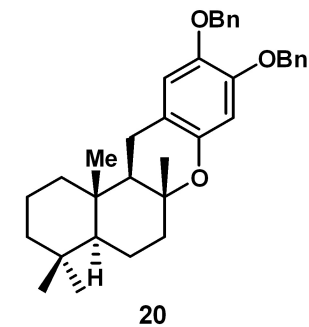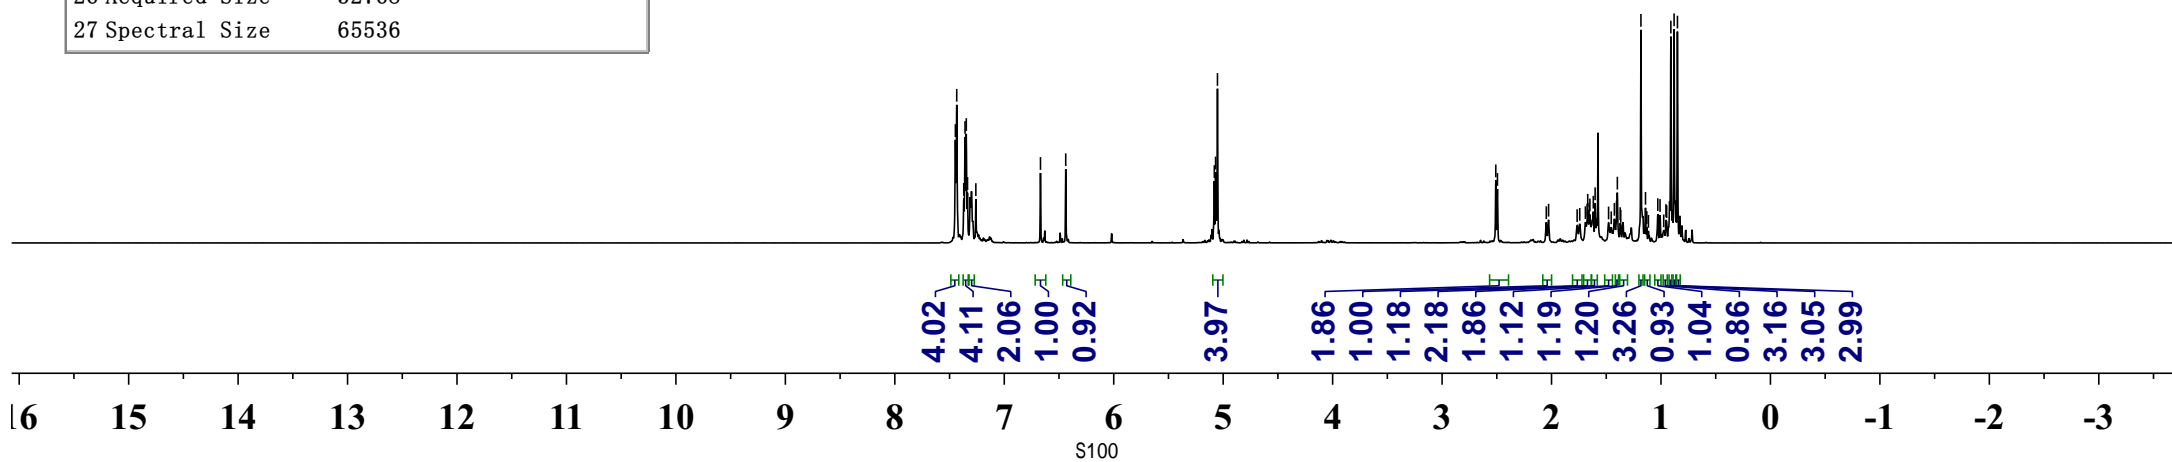



| Parameter                     | Value                                          |
|-------------------------------|------------------------------------------------|
| 1 Title                       | YYP-F-174-1-1.13.1.1r                          |
| 2 Comment                     |                                                |
| 3 Origin                      | Bruker BioSpin GmbH                            |
| 4 Owner                       | nmrsu                                          |
| 5 Site                        |                                                |
| 6 Instrument                  | Avance NEO 600                                 |
| 7 Author                      |                                                |
| 8 Solvent                     | CDC13                                          |
| 9 Temperature                 | 298.2                                          |
| 10 Pulse Sequence             | zgpg30                                         |
| 11 Experiment                 | 1D                                             |
| 12 Probe                      | Z114607_0339 (PA BBO<br>600S3 BBF-H-D-05 Z SP) |
| 13 Number of Scans            | 200                                            |
| 14 Receiver Gain              | 101.0                                          |
| 15 Relaxation Delay           | 2.0000                                         |
| 16 Pulse Width                | 11.5000                                        |
| 17 Presaturation<br>Frequency |                                                |
| 18 Acquisition Time           | 0.9175                                         |
| 19 Acquisition Date           | 2023-08-08T22:02:45                            |
| 20 Modification Date          | 2023-08-09T09:13:44                            |
| 21 Class                      |                                                |
| 22 Spectrometer<br>Frequency  | 150.91                                         |
| 23 Spectral Width             | 35714.3                                        |
| 24 Lowest Frequency           | -2750.1                                        |
| 25 Nucleus                    | <sup>13</sup> C                                |
| 26 Acquired Size              | 32768                                          |
| 27 Spectral Size              | 32768                                          |

148.9  
148.0  
142.5  
138.1  
137.5  
128.5  
128.5  
127.8  
127.7  
127.7  
127.5  
117.9  
114.0

103.8

77.4  
77.2  
77.0  
76.9  
73.0  
71.1

56.3  
52.4

42.0  
41.2  
39.4  
37.0  
33.6  
33.3

22.0  
21.7  
20.9  
19.9  
18.7  
15.0

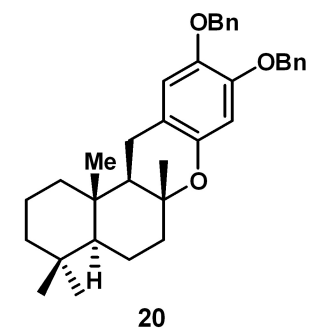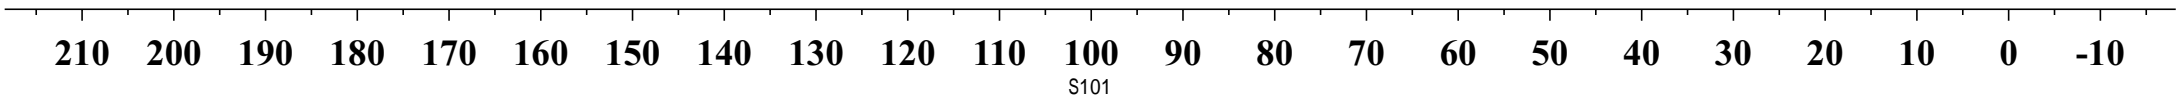

7.61  
7.20  
6.50  
6.19  
2.49  
2.48  
2.47  
2.06  
2.05  
2.05  
2.04  
1.97  
1.97  
1.96  
1.95  
1.94  
1.74  
1.74  
1.72  
1.71  
1.71  
1.70  
1.70  
1.69  
1.69  
1.68  
1.68  
1.66  
1.66  
1.65  
1.60  
1.59  
1.58  
1.57  
1.55  
1.54  
1.53  
1.52  
1.47  
1.46  
1.46  
1.45  
1.44  
1.44  
1.43  
1.43  
1.42  
1.42  
1.41  
1.41  
1.40  
1.39  
1.39  
1.39  
1.38  
1.22  
1.22  
1.20  
1.19  
1.19  
1.13  
1.07  
1.05  
1.04  
1.01  
1.01  
0.99  
0.99  
0.90  
0.86

| Parameter                     | Value                                          |
|-------------------------------|------------------------------------------------|
| 1 Title                       | YYP-G-105-1-2-Acetone.<br>10.1.1r              |
| 2 Comment                     |                                                |
| 3 Origin                      | Bruker BioSpin GmbH                            |
| 4 Owner                       | nmrsu                                          |
| 5 Site                        |                                                |
| 6 Instrument                  | Avance NEO 600                                 |
| 7 Author                      |                                                |
| 8 Solvent                     | Acetone                                        |
| 9 Temperature                 | 294.2                                          |
| 10 Pulse Sequence             | zg30                                           |
| 11 Experiment                 | 1D                                             |
| 12 Probe                      | Z114607_0339 (PA BBO<br>600S3 BBF-H-D-05 Z SP) |
| 13 Number of Scans            | 5                                              |
| 14 Receiver Gain              | 90.5                                           |
| 15 Relaxation Delay           | 1.0000                                         |
| 16 Pulse Width                | 10.0000                                        |
| 17 Presaturation<br>Frequency |                                                |
| 18 Acquisition Time           | 2.7525                                         |
| 19 Acquisition Date           | 2023-11-02T16:32:12                            |
| 20 Modification Date          | 2023-11-02T16:33:36                            |
| 21 Class                      |                                                |
| 22 Spectrometer<br>Frequency  | 600.15                                         |
| 23 Spectral Width             | 11904.8                                        |
| 24 Lowest Frequency           | -2256.9                                        |
| 25 Nucleus                    | 1H                                             |
| 26 Acquired Size              | 32768                                          |
| 27 Spectral Size              | 65536                                          |

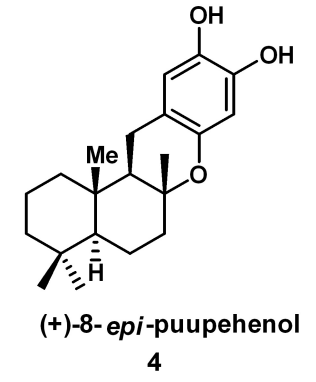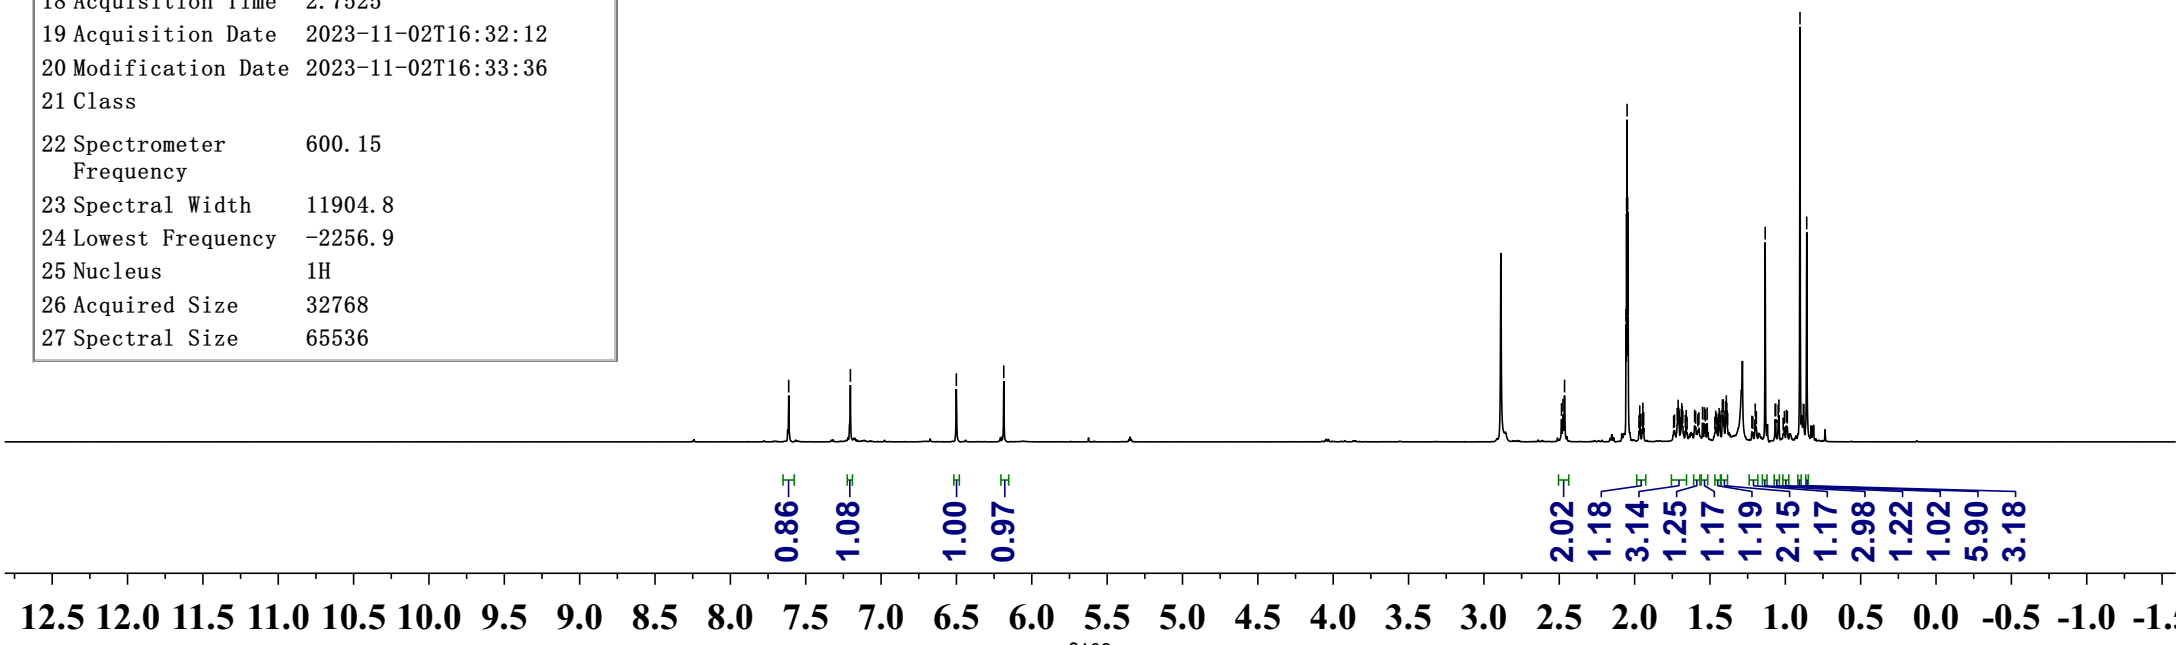

| Parameter                     | Value                                          |
|-------------------------------|------------------------------------------------|
| 1 Title                       | YYP-G-105-1-2-Acetone.<br>11.1.1r              |
| 2 Comment                     |                                                |
| 3 Origin                      | Bruker BioSpin GmbH                            |
| 4 Owner                       | nmrsu                                          |
| 5 Site                        |                                                |
| 6 Instrument                  | Avance NEO 600                                 |
| 7 Author                      |                                                |
| 8 Solvent                     | Acetone                                        |
| 9 Temperature                 | 295.8                                          |
| 10 Pulse Sequence             | zgpg30                                         |
| 11 Experiment                 | 1D                                             |
| 12 Probe                      | Z114607_0339 (PA BBO<br>600S3 BBF-H-D-05 Z SP) |
| 13 Number of Scans            | 300                                            |
| 14 Receiver Gain              | 101.0                                          |
| 15 Relaxation Delay           | 2.0000                                         |
| 16 Pulse Width                | 11.5000                                        |
| 17 Presaturation<br>Frequency |                                                |
| 18 Acquisition Time           | 0.9175                                         |
| 19 Acquisition Date           | 2023-11-02T17:21:42                            |
| 20 Modification Date          | 2023-11-02T17:25:51                            |
| 21 Class                      |                                                |
| 22 Spectrometer<br>Frequency  | 150.91                                         |
| 23 Spectral Width             | 35714.3                                        |
| 24 Data Frequency             | 278.7                                          |
| 25 Nucleus                    | 13C                                            |
| 26 Acquired Size              | 32768                                          |
| 27 Spectral Size              | 32768                                          |

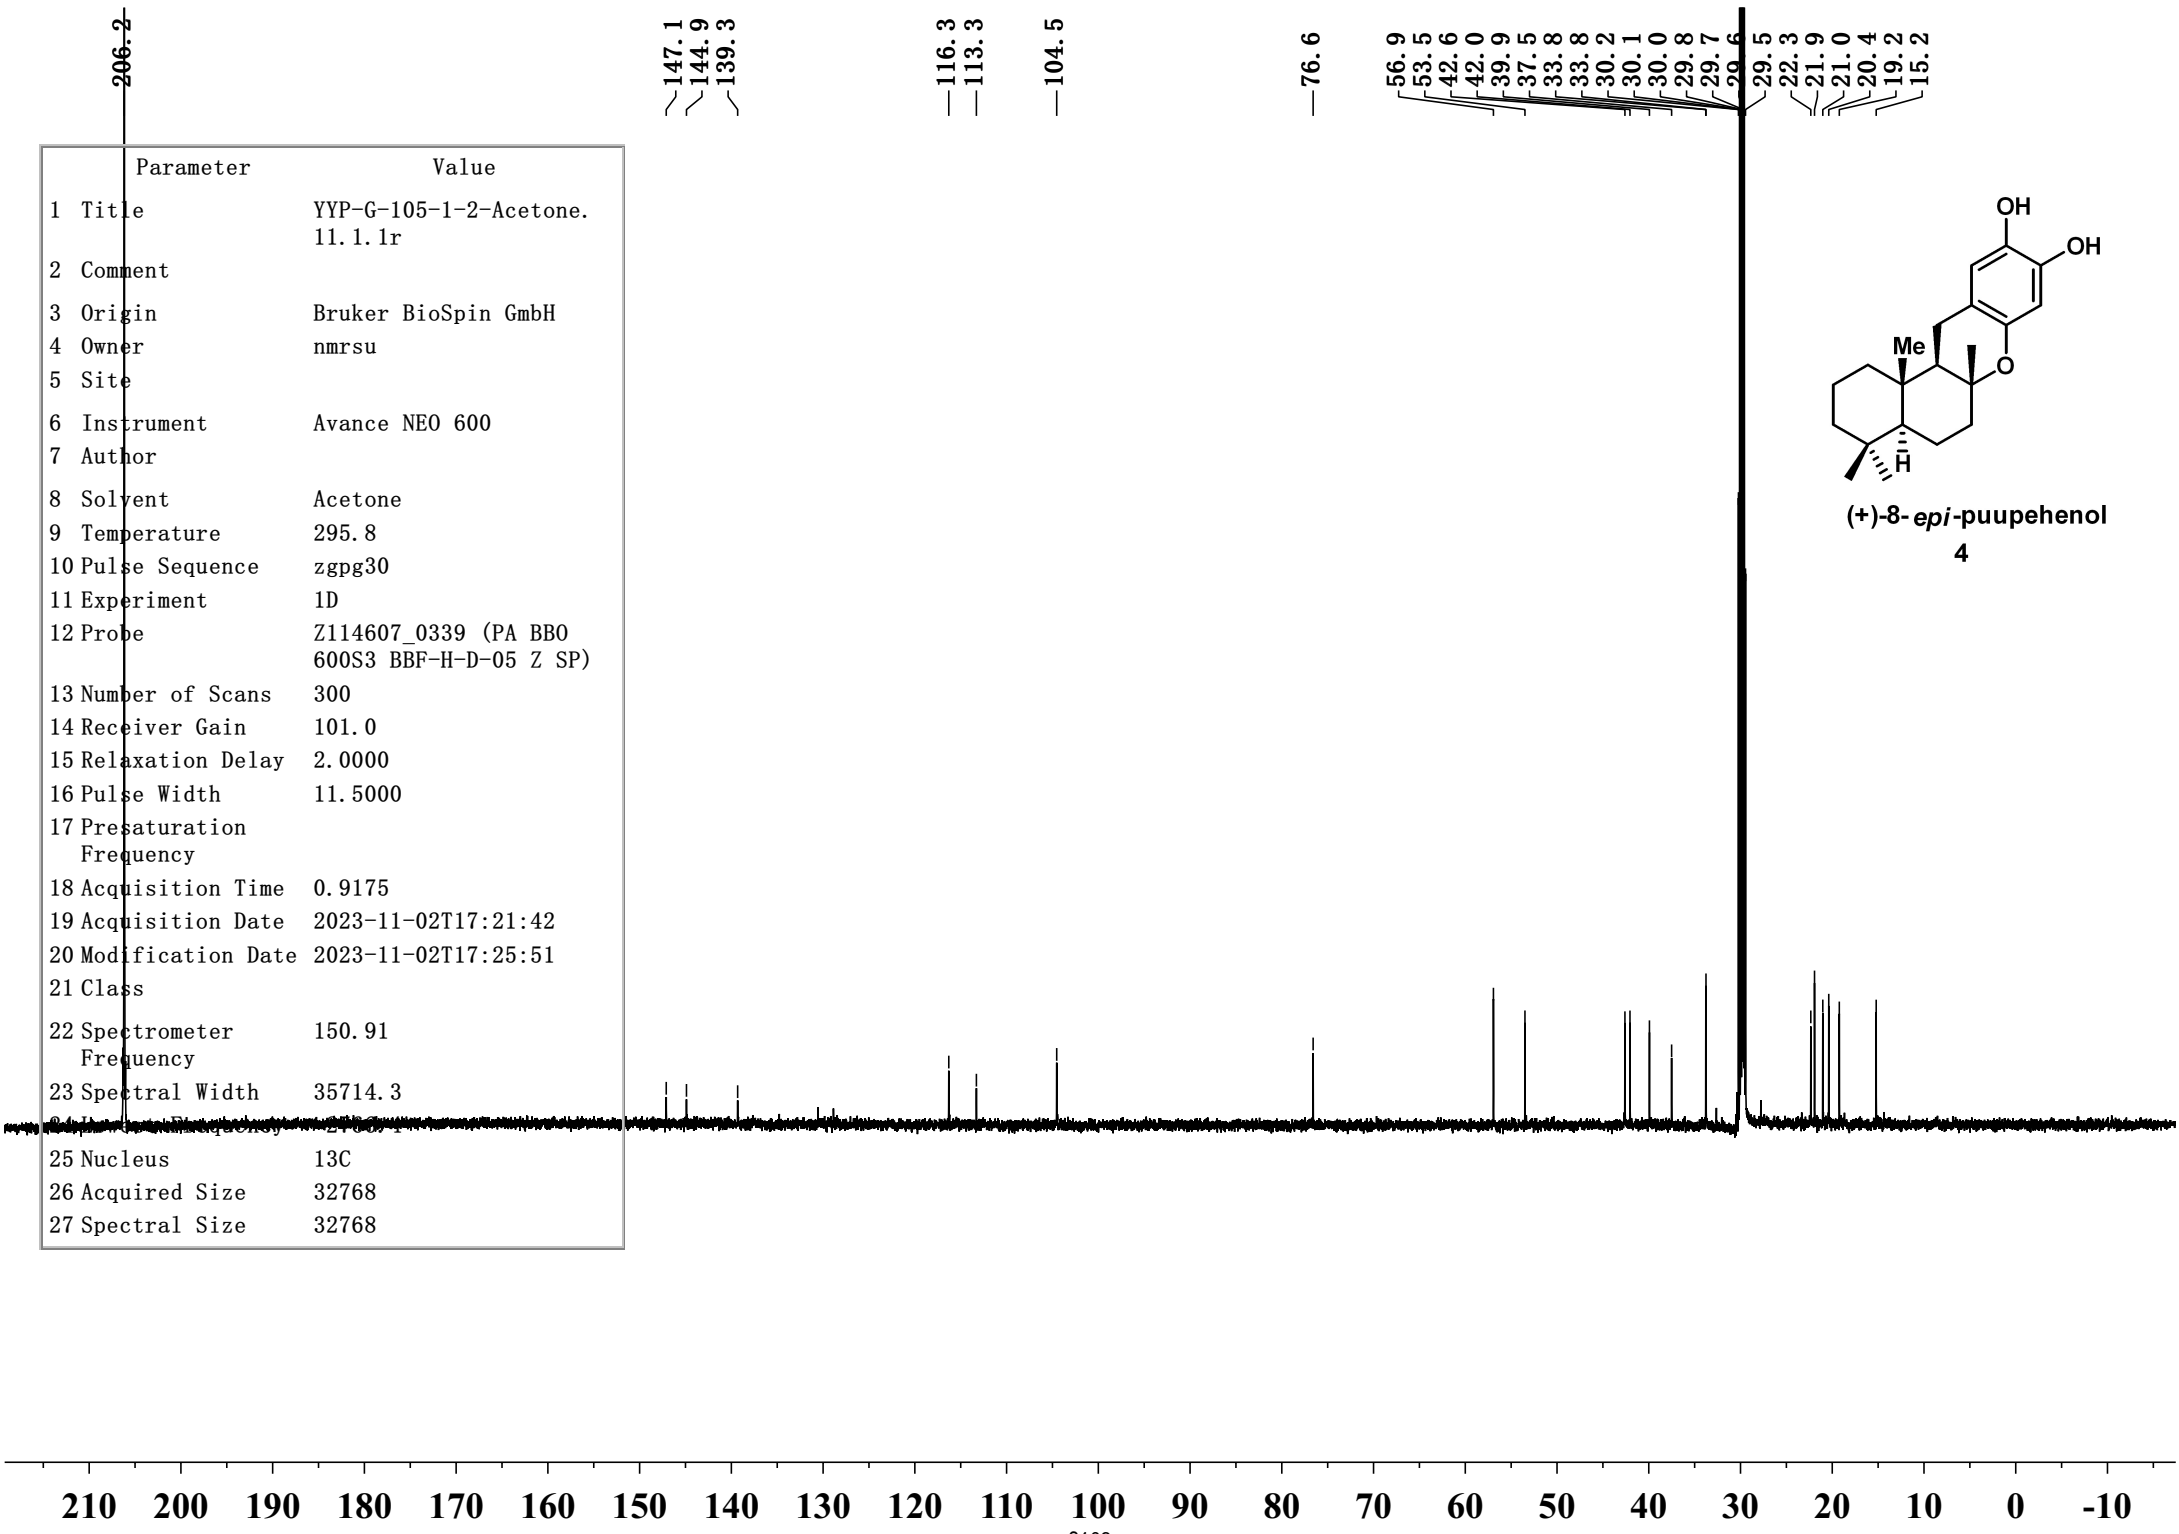

| Parameter                  | Value                                            |
|----------------------------|--------------------------------------------------|
| 1 Title                    | YYP-G-190-1-1.10.1.1r                            |
| 2 Comment                  |                                                  |
| 3 Origin                   | Bruker BioSpin GmbH                              |
| 4 Owner                    | nmrsu                                            |
| 5 Site                     |                                                  |
| 6 Instrument               | Avance Neo 400M                                  |
| 7 Author                   |                                                  |
| 8 Solvent                  | CDC13                                            |
| 9 Temperature              | 296.5                                            |
| 10 Pulse Sequence          | zg30                                             |
| 11 Experiment              | 1D                                               |
| 12 Probe                   | Z163739_0254 (PI HR-BB0400S1-BBF/ H/ D-5.0-Z SP) |
| 13 Number of Scans         | 16                                               |
| 14 Receiver Gain           | 32.0                                             |
| 15 Relaxation Delay        | 1.0000                                           |
| 16 Pulse Width             | 8.0000                                           |
| 17 Presaturation Frequency |                                                  |
| 18 Acquisition Time        | 3.9977                                           |
| 19 Acquisition Date        | 2024-06-27T12:29:16                              |
| 20 Modification Date       | 2024-06-27T14:18:04                              |
| 21 Class                   |                                                  |
| 22 Spectrometer Frequency  | 400.18                                           |
| 23 Spectral Width          | 8196.7                                           |
| 24 Lowest Frequency        | -1636.5                                          |
| 25 Nucleus                 | 1H                                               |
| 26 Acquired Size           | 32768                                            |
| 27 Spectral Size           | 65536                                            |

7.26  
7.18  
7.18  
6.71  
6.71

3.84  
3.80

2.58  
2.57  
2.55  
2.53

1.23  
1.21  
1.19

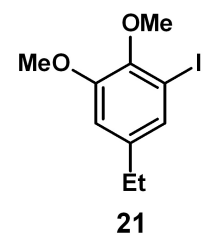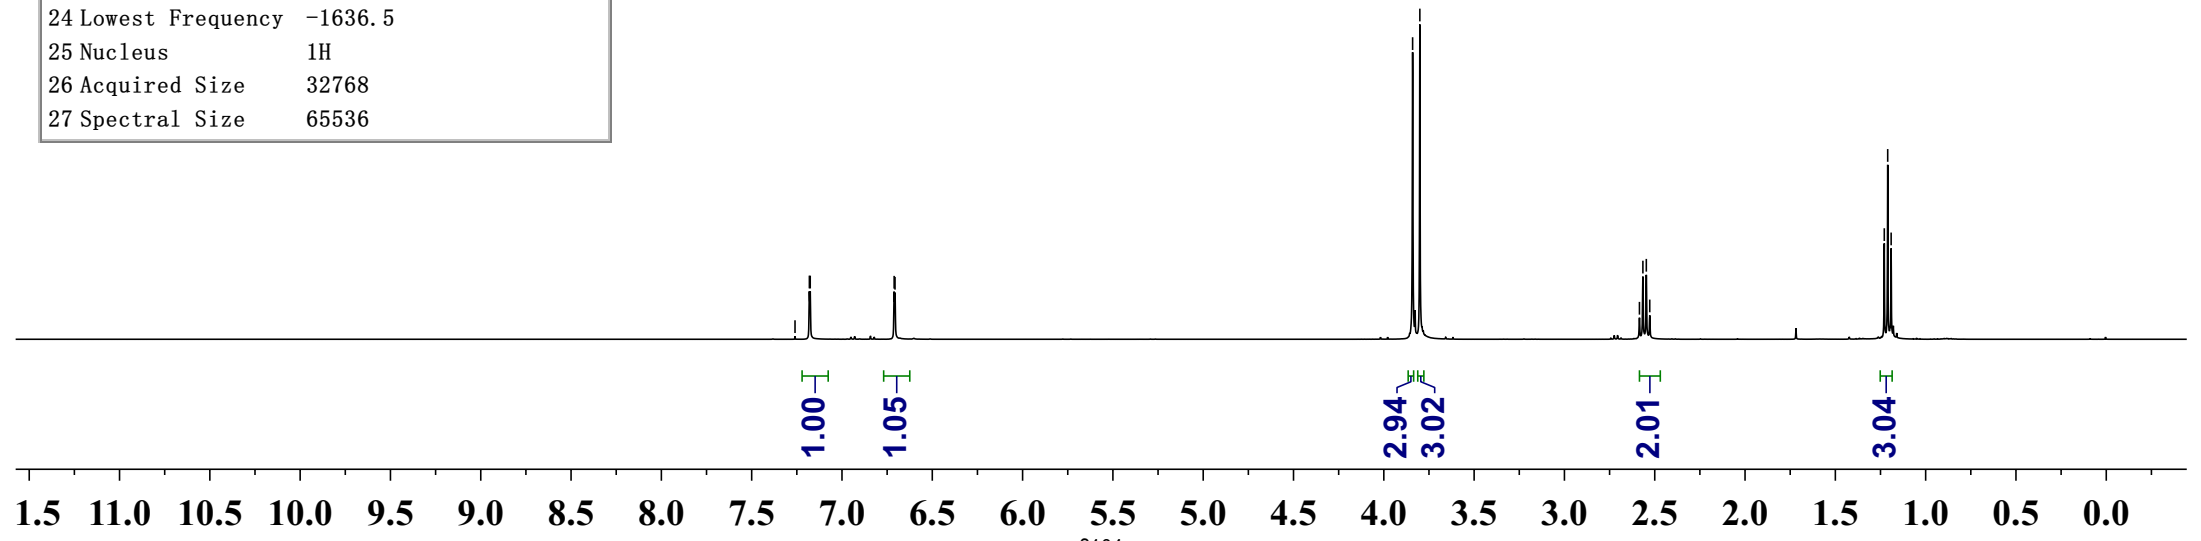

| Parameter                  | Value                                            |
|----------------------------|--------------------------------------------------|
| 1 Title                    | YYP-G-190-1-1.11.1.1r                            |
| 2 Comment                  |                                                  |
| 3 Origin                   | Bruker BioSpin GmbH                              |
| 4 Owner                    | nmrsu                                            |
| 5 Site                     |                                                  |
| 6 Instrument               | Avance Neo 400M                                  |
| 7 Author                   |                                                  |
| 8 Solvent                  | CDC13                                            |
| 9 Temperature              | 297.3                                            |
| 10 Pulse Sequence          | zgpg30                                           |
| 11 Experiment              | 1D                                               |
| 12 Probe                   | Z163739_0254 (PI HR-BBO400Si-BBF/ H/ D-5.0-Z SP) |
| 13 Number of Scans         | 100                                              |
| 14 Receiver Gain           | 41.1                                             |
| 15 Relaxation Delay        | 2.0000                                           |
| 16 Pulse Width             | 7.8100                                           |
| 17 Presaturation Frequency |                                                  |
| 18 Acquisition Time        | 1.3763                                           |
| 19 Acquisition Date        | 2024-06-27T12:37:36                              |
| 20 Modification Date       | 2024-06-27T14:18:05                              |
| 21 Class                   |                                                  |
| 22 Spectrometer Frequency  | 100.63                                           |
| 23 Spectral Width          | 23809.5                                          |
| 24 Lowest Frequency        | -1841.8                                          |
| 25 Nucleus                 | <sup>13</sup> C                                  |
| 26 Acquired Size           | 32768                                            |
| 27 Spectral Size           | 32768                                            |

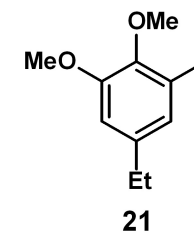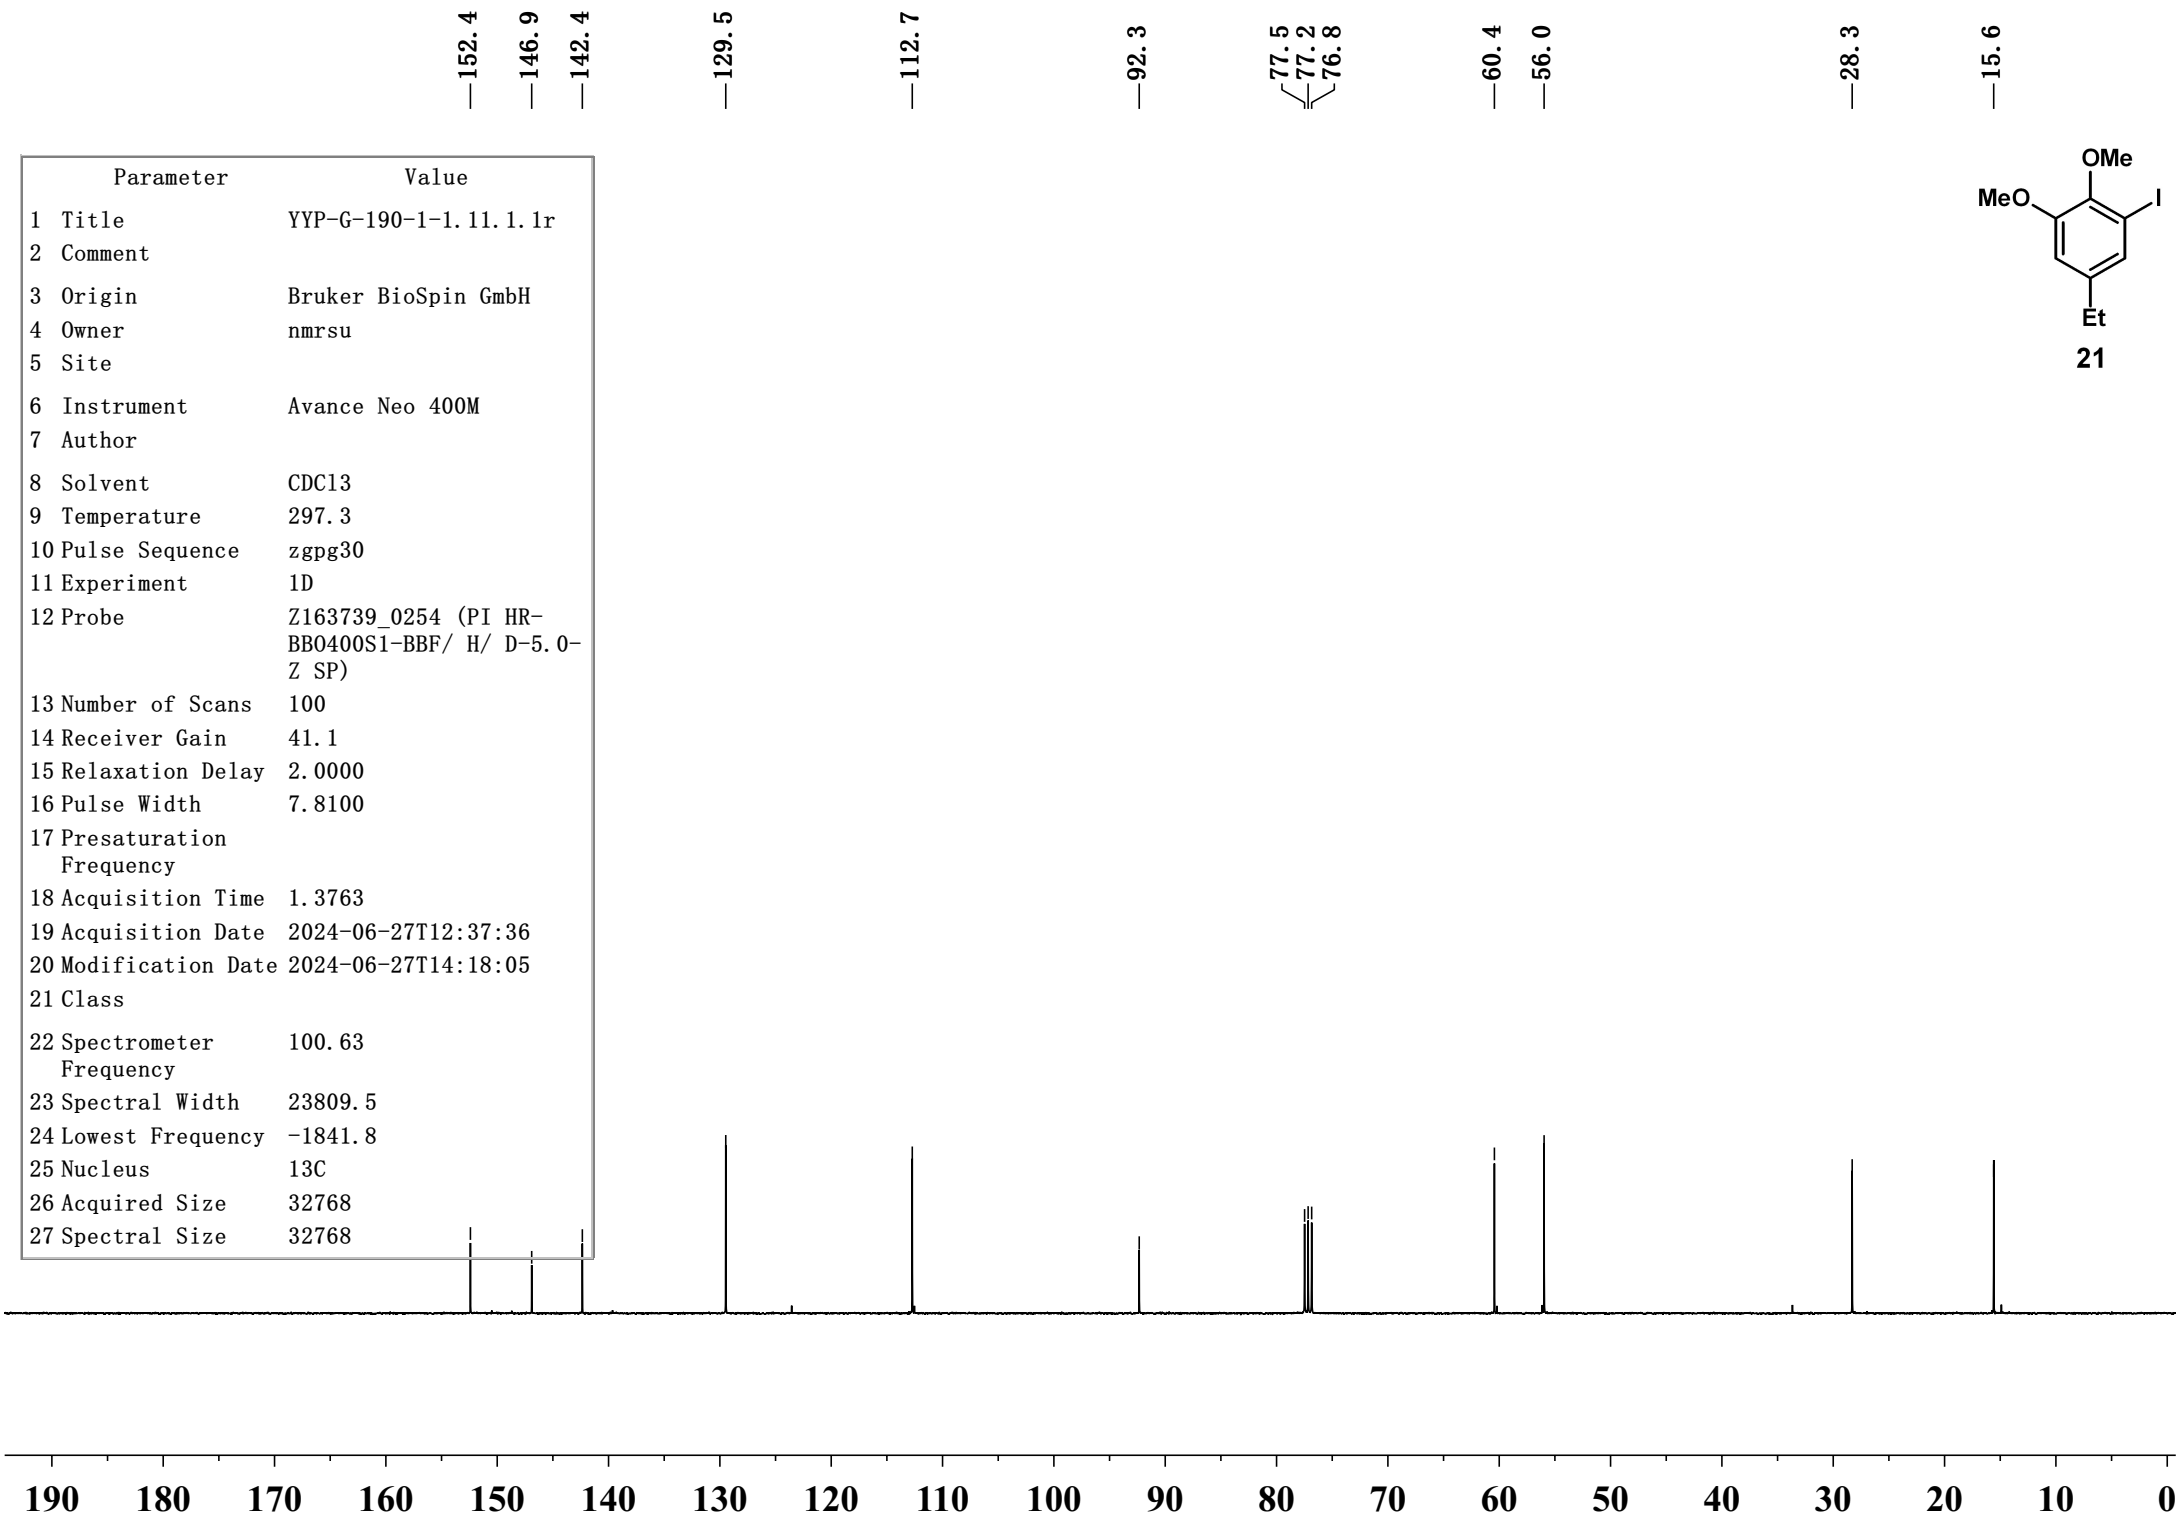

7.26  
6.70  
6.69  
6.57  
6.57  
5.38  
5.37  
5.37  
5.37  
5.36  
5.36  
3.85  
3.77  
2.74  
2.72  
2.70  
2.68  
2.64  
2.64  
2.62  
2.60  
2.58  
2.56  
2.39  
2.38  
2.36  
2.02  
-1.98  
-1.94  
-1.90  
-1.85  
-1.59  
-1.59  
-1.57  
-1.56  
-1.55  
-1.52  
-1.48  
-1.47  
-1.46  
-1.46  
-1.45  
-1.45  
-1.45  
-1.44  
-1.44  
-1.43  
-1.42  
-1.42  
-1.42  
1.32  
1.31  
1.29  
1.28  
1.25  
1.23  
1.21  
1.19  
1.18  
1.17  
1.16  
1.14  
1.13  
1.11  
1.10  
0.92  
0.91  
0.89

| Parameter                  | Value                                            |
|----------------------------|--------------------------------------------------|
| 1 Title                    | YYP-G-193-2-2.10.1.1r                            |
| 2 Comment                  |                                                  |
| 3 Origin                   | Bruker BioSpin GmbH                              |
| 4 Owner                    | nmrsu                                            |
| 5 Site                     |                                                  |
| 6 Instrument               | Avance Neo 400M                                  |
| 7 Author                   |                                                  |
| 8 Solvent                  | CDC13                                            |
| 9 Temperature              | 296.5                                            |
| 10 Pulse Sequence          | zg30                                             |
| 11 Experiment              | 1D                                               |
| 12 Probe                   | Z163739_0254 (PI HR-BBO400S1-BBF/ H/ D-5.0-Z SP) |
| 13 Number of Scans         | 16                                               |
| 14 Receiver Gain           | 46.2                                             |
| 15 Relaxation Delay        | 1.0000                                           |
| 16 Pulse Width             | 8.0000                                           |
| 17 Presaturation Frequency |                                                  |
| 18 Acquisition Time        | 3.9977                                           |
| 19 Acquisition Date        | 2024-06-28T12:17:31                              |
| 20 Modification Date       | 2024-06-28T13:07:38                              |
| 21 Class                   |                                                  |
| 22 Spectrometer Frequency  | 400.18                                           |
| 23 Spectral Width          | 8196.7                                           |
| 24 Lowest Frequency        | -1636.4                                          |
| 25 Nucleus                 | 1H                                               |
| 26 Acquired Size           | 32768                                            |
| 27 Spectral Size           | 65536                                            |

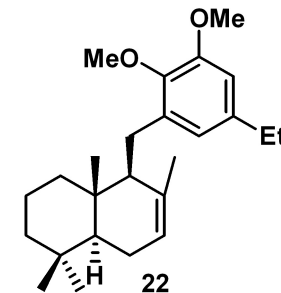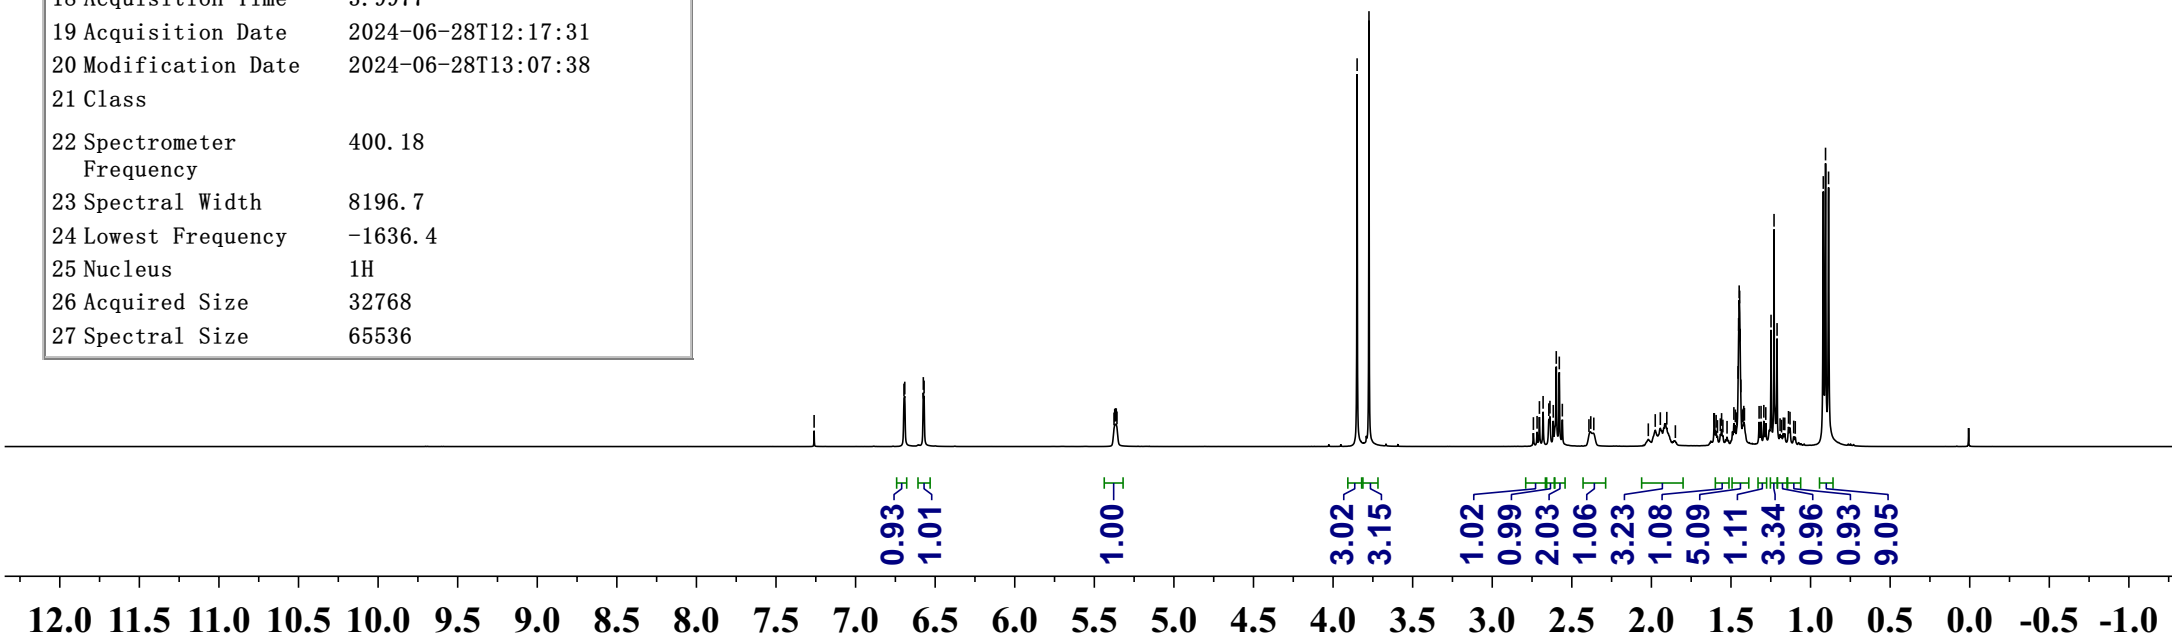

| Parameter                  | Value                                                   |
|----------------------------|---------------------------------------------------------|
| 1 Title                    | YYP-<br>G-193-2-2.11.1.1r                               |
| 2 Comment                  |                                                         |
| 3 Origin                   | Bruker BioSpin GmbH                                     |
| 4 Owner                    | nmrsu                                                   |
| 5 Site                     |                                                         |
| 6 Instrument               | Avance Neo 400M                                         |
| 7 Author                   |                                                         |
| 8 Solvent                  | CDC13                                                   |
| 9 Temperature              | 297.2                                                   |
| 10 Pulse Sequence          | zgpg30                                                  |
| 11 Experiment              | 1D                                                      |
| 12 Probe                   | Z163739_0254 (PI HR-<br>BB0400S1-BBF/ H/<br>D-5.0-Z SP) |
| 13 Number of Scans         | 150                                                     |
| 14 Receiver Gain           | 40.1                                                    |
| 15 Relaxation Delay        | 2.0000                                                  |
| 16 Pulse Width             | 7.8100                                                  |
| 17 Presaturation Frequency |                                                         |
| 18 Acquisition Time        | 1.3763                                                  |
| 19 Acquisition Date        | 2024-06-28T12:28:22                                     |
| 20 Modification Date       | 2024-06-28T13:07:38                                     |
| 21 Class                   |                                                         |
| 22 Spectrometer Frequency  | 100.63                                                  |
| 23 Spectral Width          | 23809.5                                                 |
| 24 Lowest Frequency        | -1831.3                                                 |
| 25 Nucleus                 | 13C                                                     |
| 26 Acquired Size           | 32768                                                   |
| 27 Spectral Size           | 32768                                                   |

—152.5      —144.9      —139.6      —137.4      —136.1      —122.0      —120.6      —109.1      —77.5      —77.2      —76.8      —60.5      —55.7      —54.6      —50.4      —42.4      —39.6      —37.0      —33.4      —33.2      —29.1      —26.3      —23.9      —22.6      —22.2      —19.1      —16.0      —14.1

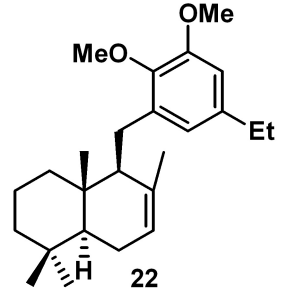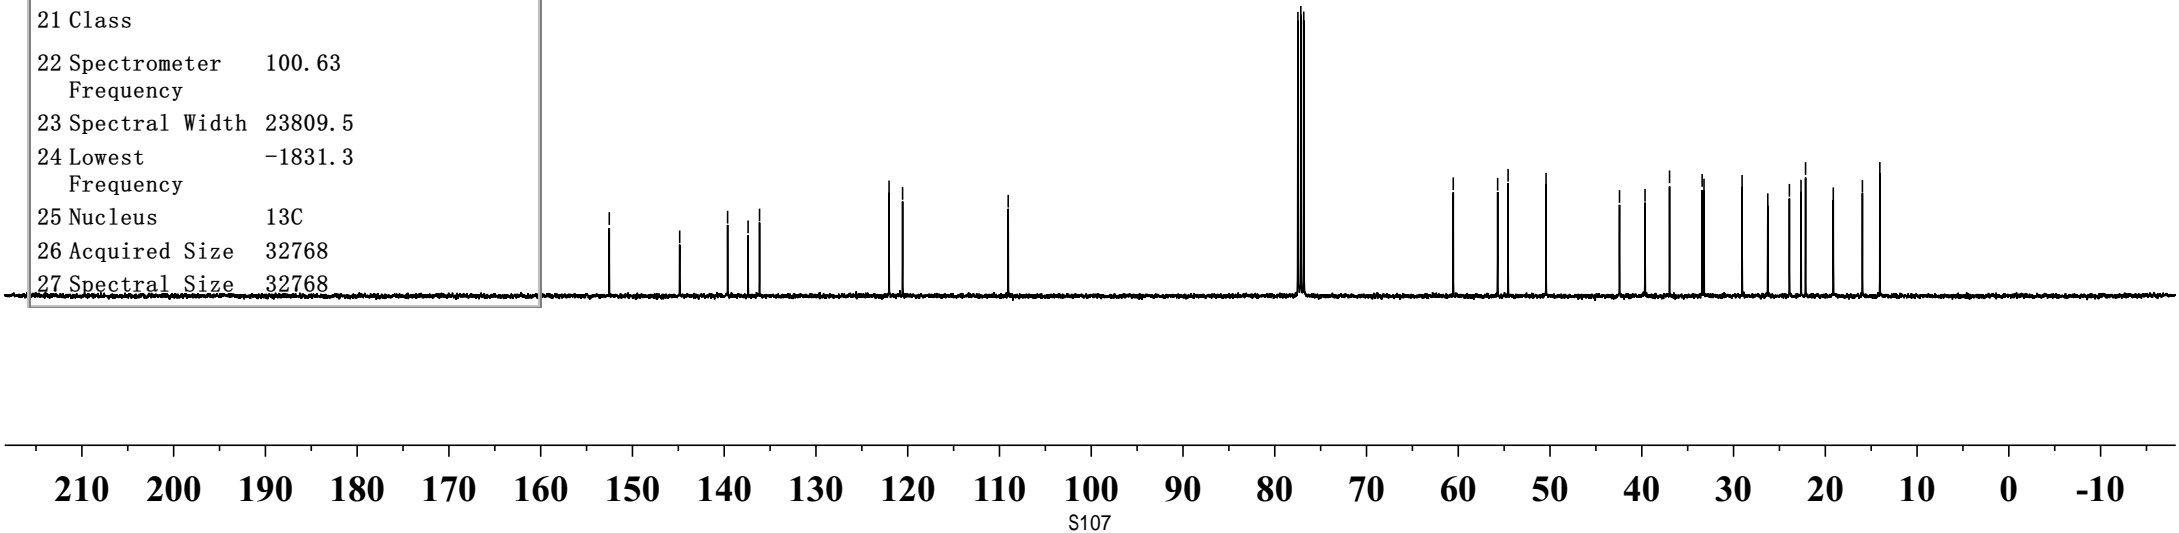

| Parameter                  | Value                                           |
|----------------------------|-------------------------------------------------|
| 1 Title                    | YYP-G-194-1-3.22.1.1r                           |
| 2 Comment                  |                                                 |
| 3 Origin                   | Bruker BioSpin GmbH                             |
| 4 Owner                    | nmsu                                            |
| 5 Site                     |                                                 |
| 6 Instrument               | Avance Neo 400M                                 |
| 7 Author                   |                                                 |
| 8 Solvent                  | CDC13                                           |
| 9 Temperature              | 297.5                                           |
| 10 Pulse Sequence          | zg30                                            |
| 11 Experiment              | 1D                                              |
| 12 Probe                   | Z163739_0254 (PI HR-BBO400Si-BBF/ H/D-5.0-Z SP) |
| 13 Number of Scans         | 11                                              |
| 14 Receiver Gain           | 76.6                                            |
| 15 Relaxation Delay        | 1.0000                                          |
| 16 Pulse Width             | 8.0000                                          |
| 17 Presaturation Frequency |                                                 |
| 18 Acquisition Time        | 3.9977                                          |
| 19 Acquisition Date        | 2024-06-29T20:30:29                             |
| 20 Modification Date       | 2024-06-29T20:44:16                             |
| 21 Class                   |                                                 |
| 22 Spectrometer Frequency  | 400.18                                          |
| 23 Spectral Width          | 8196.7                                          |
| 24 Lowest Frequency        | -1636.4                                         |
| 25 Nucleus                 | 1H                                              |
| 26 Acquired Size           | 32768                                           |
| 27 Spectral Size           | 65536                                           |

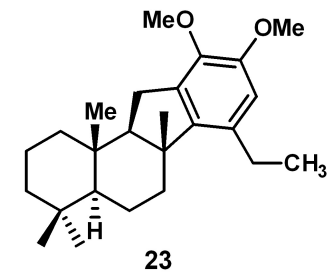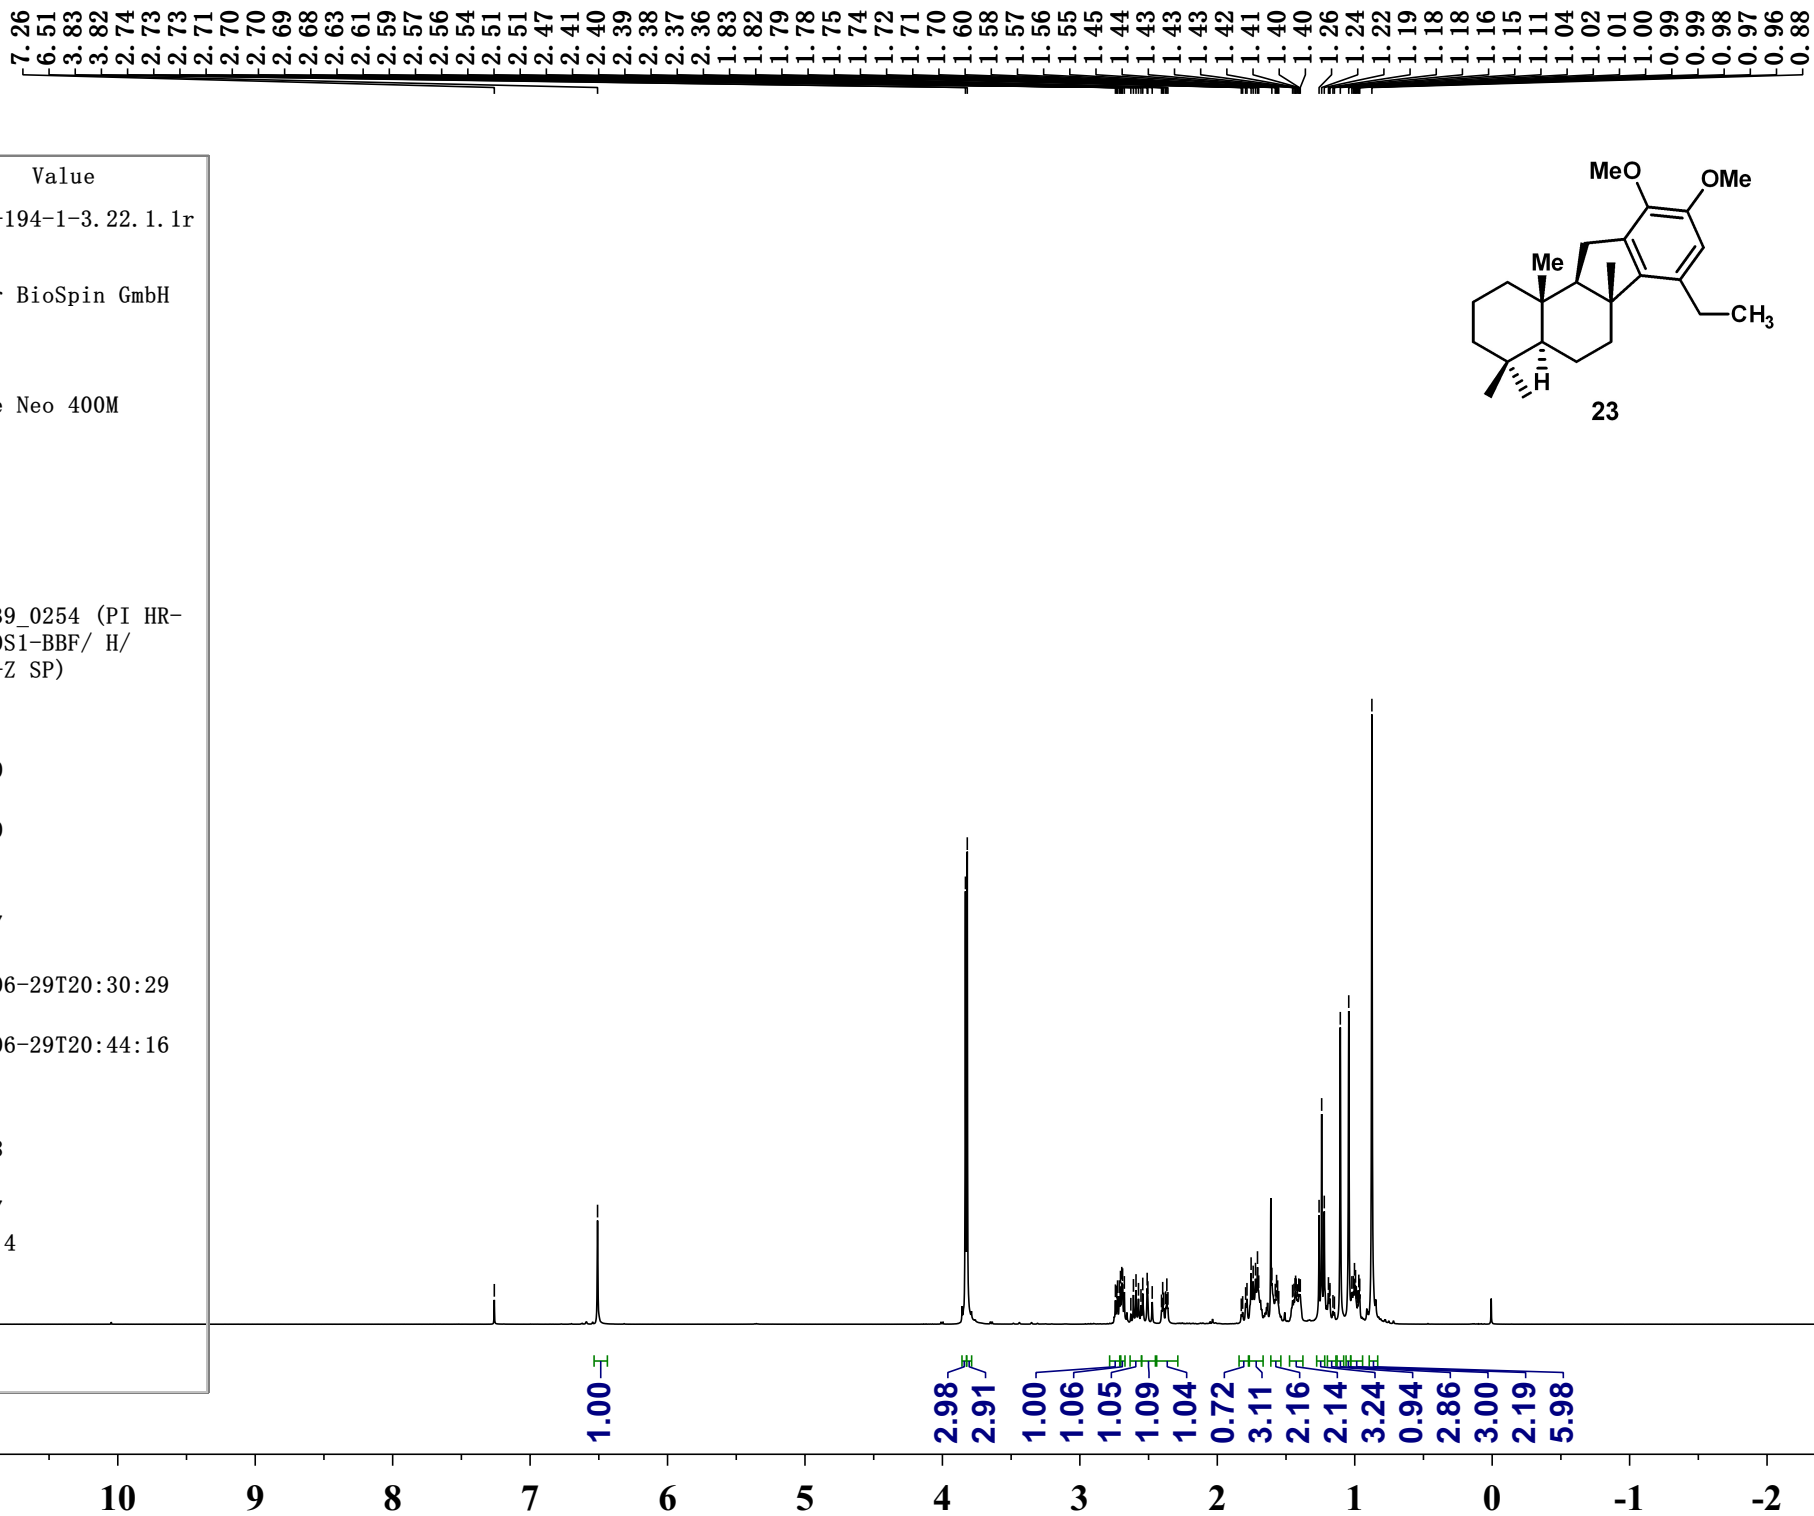



| Parameter                  | Value                                           |
|----------------------------|-------------------------------------------------|
| 1 Title                    | YYP-G-194-1-3. 23. 1. 1r                        |
| 2 Comment                  |                                                 |
| 3 Origin                   | Bruker BioSpin GmbH                             |
| 4 Owner                    | nmr-su                                          |
| 5 Site                     |                                                 |
| 6 Instrument               | Avance Neo 400M                                 |
| 7 Author                   |                                                 |
| 8 Solvent                  | CDCl <sub>3</sub>                               |
| 9 Temperature              | 298.1                                           |
| 10 Pulse Sequence          | zgpg30                                          |
| 11 Experiment              | 1D                                              |
| 12 Probe                   | Z163739_0254 (PI HR-BB0400S1-BBF/ H/D-5.0-Z SP) |
| 13 Number of Scans         | 162                                             |
| 14 Receiver Gain           | 42.0                                            |
| 15 Relaxation Delay        | 2.0000                                          |
| 16 Pulse Width             | 7.8100                                          |
| 17 Presaturation Frequency |                                                 |
| 18 Acquisition Time        | 1.3763                                          |
| 19 Acquisition Date        | 2024-06-29T20:41:34                             |
| 20 Modification Date       | 2024-06-29T20:44:16                             |
| 21 Class                   |                                                 |
| 22 Spectrometer Frequency  | 100.63                                          |
| 23 Spectral Width          | 23809.5                                         |
| 24 Lowest Frequency        | -1830.6                                         |
| 25 Nucleus                 | <sup>13</sup> C                                 |
| 26 Acquired Size           | 32768                                           |
| 27 Spectral Size           | 32768                                           |

<sup>150.5</sup>  
<sup>145.0</sup>  
<sup>143.7</sup>  
<sup>136.0</sup>  
<sup>133.9</sup>  
<sup>111.2</sup>  
<sup>77.5</sup>  
<sup>77.2</sup>  
<sup>76.8</sup>  
<sup>64.4</sup>  
<sup>60.5</sup>  
<sup>57.2</sup>  
<sup>56.1</sup>  
<sup>48.0</sup>  
<sup>42.7</sup>  
<sup>40.3</sup>  
<sup>39.4</sup>  
<sup>37.2</sup>  
<sup>33.5</sup>  
<sup>33.2</sup>  
<sup>25.4</sup>  
<sup>24.8</sup>  
<sup>21.5</sup>  
<sup>21.3</sup>  
<sup>19.8</sup>  
<sup>18.5</sup>  
<sup>16.3</sup>  
<sup>16.2</sup>

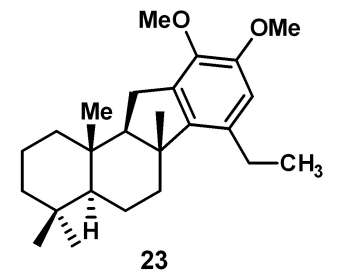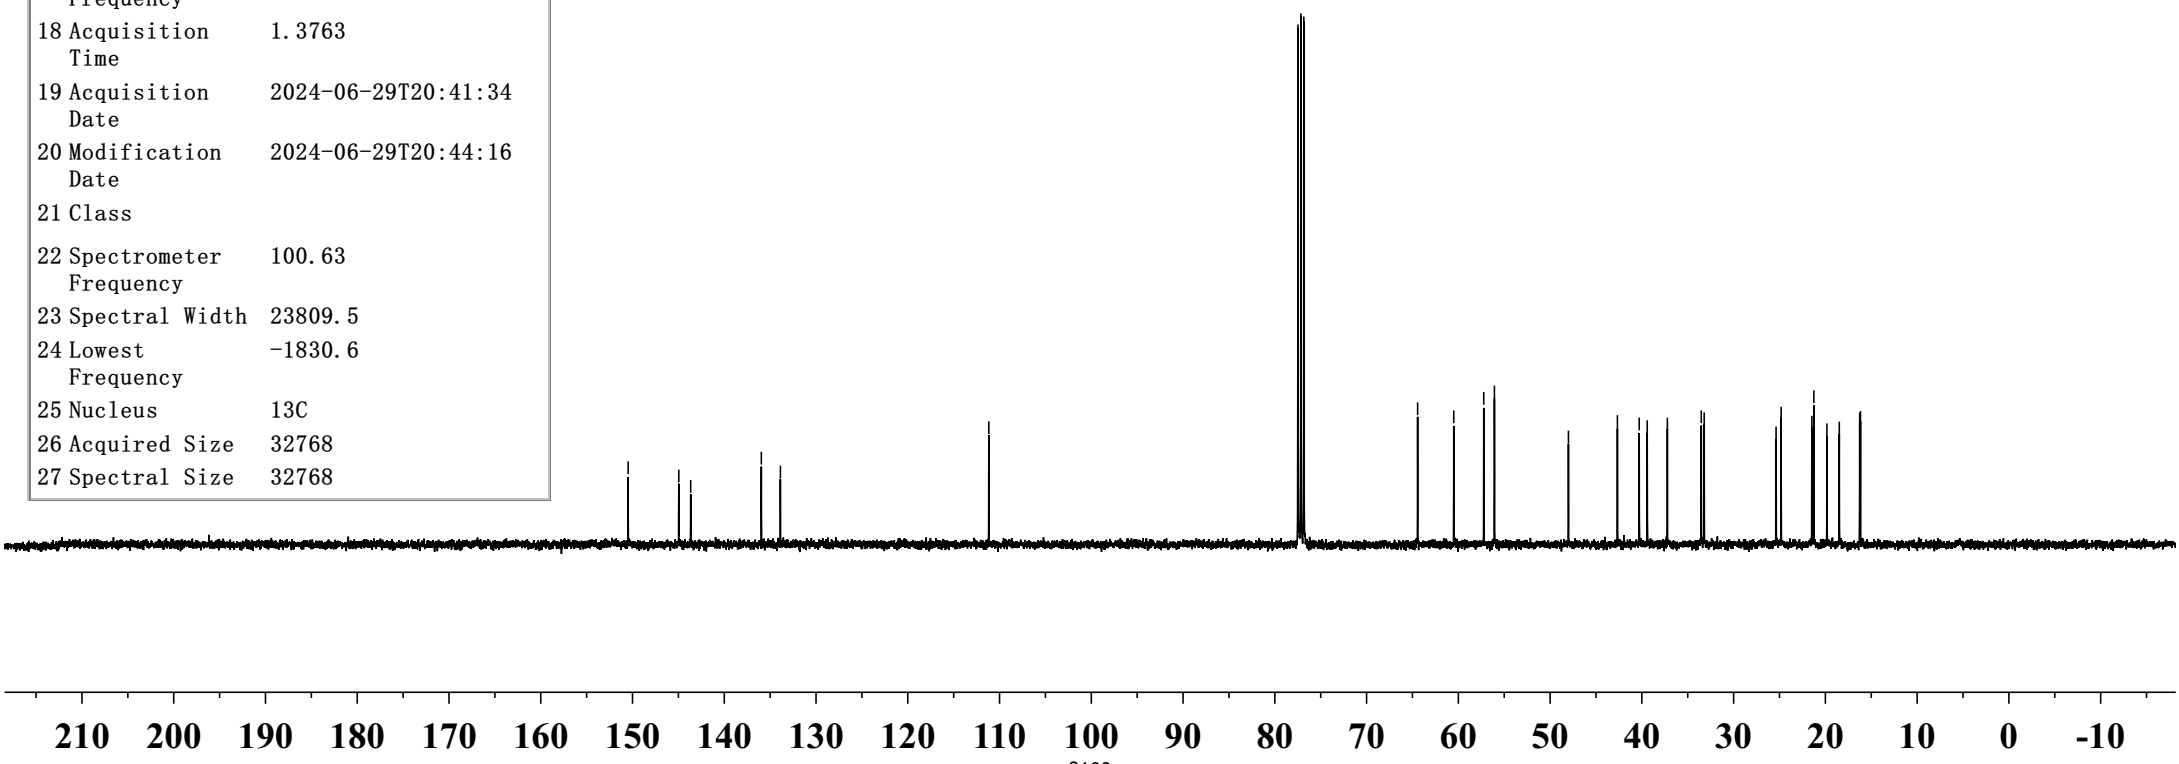

| Parameter                     | Value                                             |
|-------------------------------|---------------------------------------------------|
| 1 Title                       | mfj-4-2P-H.1.1.1r                                 |
| 2 Comment                     |                                                   |
| 3 Origin                      | Bruker BioSpin GmbH                               |
| 4 Owner                       | nmrsu                                             |
| 5 Site                        |                                                   |
| 6 Instrument                  | AVANCE NEO 400 MHZ<br>DIGITAL NMR<br>SPECTROMETER |
| 7 Author                      |                                                   |
| 8 Solvent                     | CDCl3                                             |
| 9 Temperature                 | 298.2                                             |
| 10 Pulse Sequence             | zg30                                              |
| 11 Experiment                 | 1D                                                |
| 12 Probe                      | Z116098_0723 (PA BBO<br>400S1 BBF-H-D-05 Z<br>SP) |
| 13 Number of Scans            | 8                                                 |
| 14 Receiver Gain              | 101.0                                             |
| 15 Relaxation<br>Delay        | 1.0000                                            |
| 16 Pulse Width                | 8.8100                                            |
| 17 Presaturation<br>Frequency |                                                   |
| 18 Acquisition<br>Time        | 3.9977                                            |
| 19 Acquisition<br>Date        | 2024-05-29T10:30:17                               |
| 20 Modification<br>Date       | 2024-05-29T12:08:18                               |
| 21 Class                      |                                                   |
| 22 Spectrometer<br>Frequency  | 400.13                                            |
| 23 Spectral Width             | 8196.7                                            |
| 24 Lowest<br>Frequency        | -1637.2                                           |
| 25 Nucleus                    | 1H                                                |
| 26 Acquired Size              | 32768                                             |
| 27 Spectral Size              | 65536                                             |

7.97  
7.88  
7.87  
7.87  
7.85  
7.85  
7.59  
7.58  
7.58  
7.57  
7.56  
7.55  
7.51  
7.49  
7.49  
7.49  
7.47  
7.47  
7.26  
7.23  
7.21  
7.19  
7.04  
7.03  
7.02  
7.01  
6.75  
6.75  
6.73  
6.73

—3.66

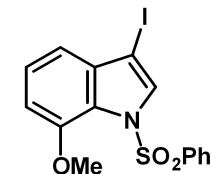

24

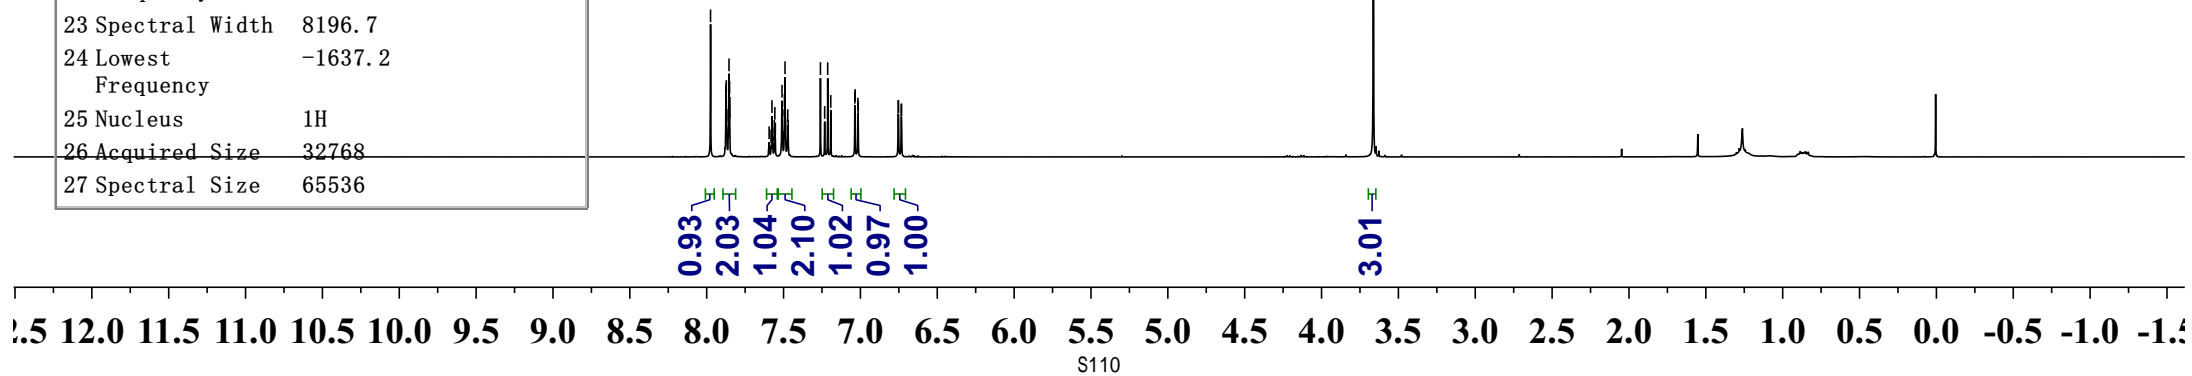

| Parameter                     | Value                                             |
|-------------------------------|---------------------------------------------------|
| 1 Title                       | mfj-4-2P-H. 2. 1. 1r                              |
| 2 Comment                     |                                                   |
| 3 Origin                      | Bruker BioSpin GmbH                               |
| 4 Owner                       | nmrsu                                             |
| 5 Site                        |                                                   |
| 6 Instrument                  | AVANCE NEO 400 MHZ<br>DIGITAL NMR<br>SPECTROMETER |
| 7 Author                      |                                                   |
| 8 Solvent                     | CDC13                                             |
| 9 Temperature                 | 298.2                                             |
| 10 Pulse Sequence             | zgpg30                                            |
| 11 Experiment                 | 1D                                                |
| 12 Probe                      | Z116098_0723 (PA BBO<br>400S1 BBF-H-D-05 Z SP)    |
| 13 Number of Scans            | 189                                               |
| 14 Receiver Gain              | 57.0                                              |
| 15 Relaxation Delay           | 2.0000                                            |
| 16 Pulse Width                | 10.0000                                           |
| 17 Presaturation<br>Frequency |                                                   |
| 18 Acquisition Time           | 1.3763                                            |
| 19 Acquisition Date           | 2024-05-29T10:42:18                               |
| 20 Modification<br>Date       | 2024-05-29T12:08:18                               |
| 21 Class                      |                                                   |
| 22 Spectrometer<br>Frequency  | 100.61                                            |
| 23 Spectral Width             | 23809.5                                           |
| 24 Lowest Frequency           | -1831.5                                           |
| 25 Nucleus                    | 13C                                               |
| 26 Acquired Size              | 32768                                             |
| 27 Spectral Size              | 32768                                             |

—147.1  
 /140.0  
 /135.3  
 /133.6  
 /132.1  
 /129.0  
 /127.5  
 /124.8  
 /124.3  
 —114.7  
 —107.8  
 /77.5  
 /77.2  
 /76.8  
 —64.8  
 —55.7



24

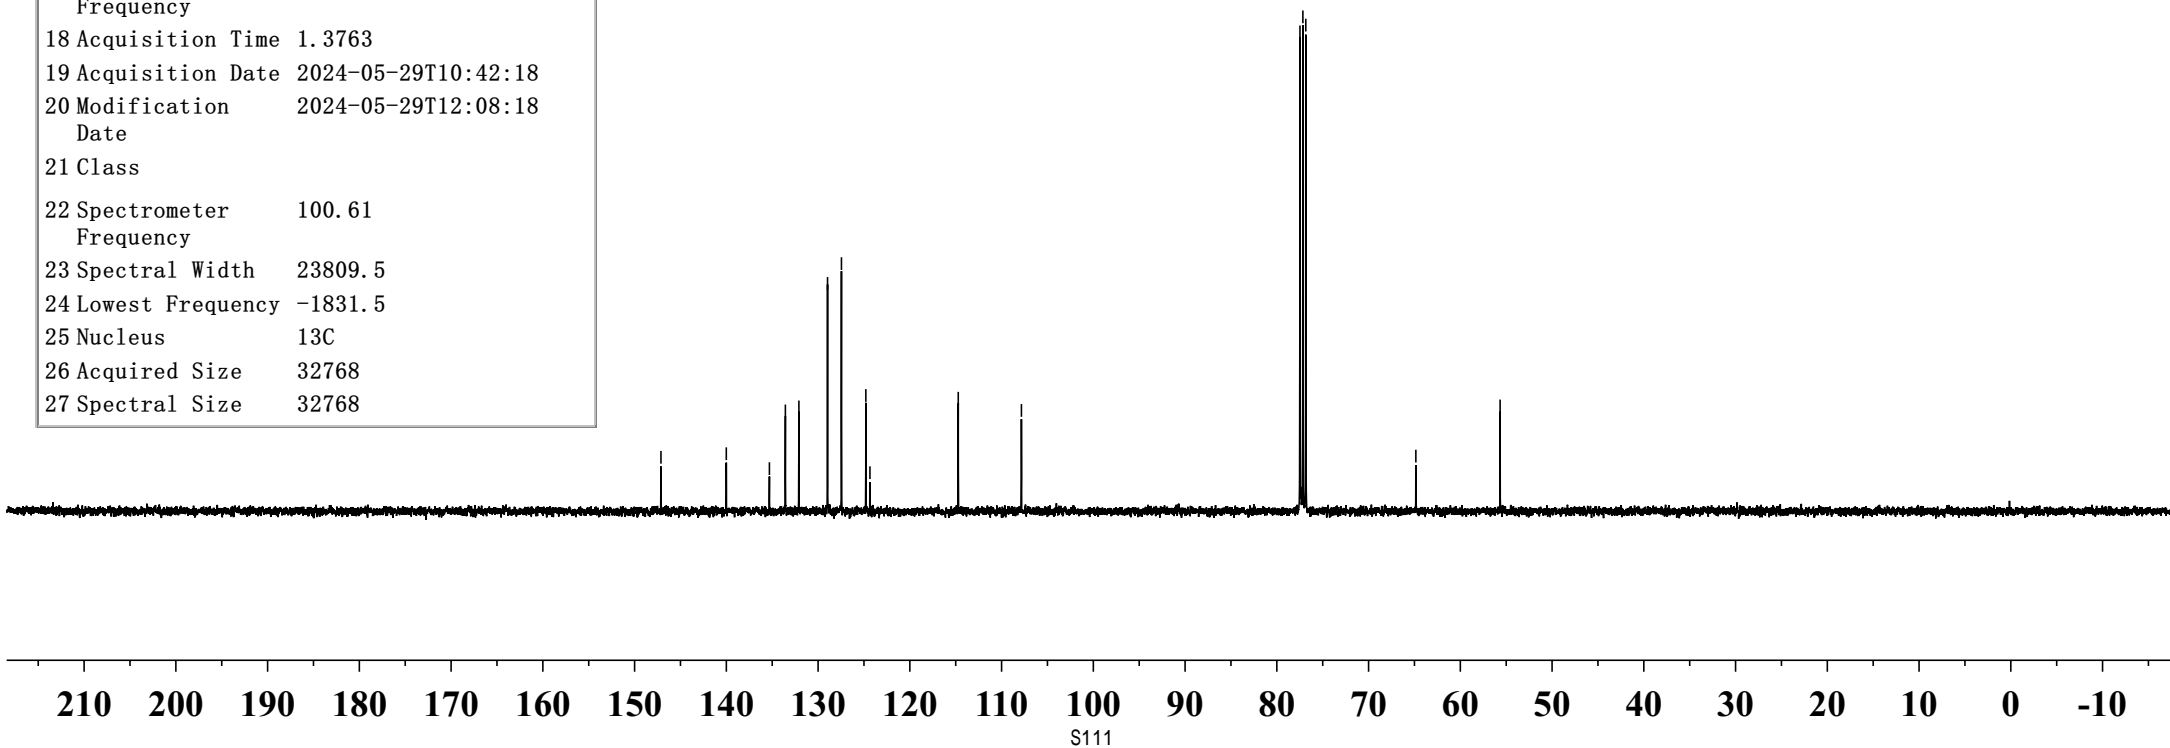

7.83  
7.81  
7.64  
7.54  
7.54  
7.53  
7.52  
7.52  
7.47  
7.46  
7.44  
7.26  
7.19  
7.18  
7.17  
7.17  
7.15  
7.14  
7.13  
6.69  
6.68  
5.46  
5.46  
5.46  
5.45  
3.65  
2.83  
2.83  
2.81  
2.80  
2.80  
2.59  
2.58  
2.57  
2.55  
2.48  
2.47  
2.46  
2.07  
2.05  
2.04  
2.04  
1.99  
1.96  
1.93  
1.91  
1.62  
1.61  
1.61  
1.60  
1.54  
1.51  
1.50  
1.50  
1.48  
1.48  
1.47  
1.47  
1.45  
1.45  
1.45  
1.37  
1.36  
1.35  
1.34  
1.34  
1.27  
1.26  
1.25  
1.25  
1.23  
1.22  
1.20  
1.20  
1.18  
1.18  
1.16  
1.15  
0.94  
0.93  
0.92

| Parameter                     | Value                                               |
|-------------------------------|-----------------------------------------------------|
| 1 Title                       | YYP-<br>G-174-4-4-0829.10.1.1r                      |
| 2 Comment                     |                                                     |
| 3 Origin                      | Bruker BioSpin GmbH                                 |
| 4 Owner                       | nmrsu                                               |
| 5 Site                        |                                                     |
| 6 Instrument                  | Avance NEO 600                                      |
| 7 Author                      |                                                     |
| 8 Solvent                     | CDCl3                                               |
| 9 Temperature                 | 298.1                                               |
| 10 Pulse Sequence             | zg30                                                |
| 11 Experiment                 | 1D                                                  |
| 12 Probe                      | Z168773_0001 (CPP1.1 BBO<br>600S3 BB-H&F-D-05 Z XT) |
| 13 Number of Scans            | 8                                                   |
| 14 Receiver Gain              | 45.2                                                |
| 15 Relaxation Delay           | 1.0000                                              |
| 16 Pulse Width                | 12.0000                                             |
| 17 Presaturation<br>Frequency |                                                     |
| 18 Acquisition Time           | 2.7525                                              |
| 19 Acquisition Date           | 2024-08-29T22:38:53                                 |
| 20 Modification<br>Date       | 2024-08-30T09:18:44                                 |
| 21 Class                      |                                                     |
| 22 Spectrometer<br>Frequency  | 600.15                                              |
| 23 Spectral Width             | 11904.8                                             |
| 24 Lowest Frequency           | -2259.8                                             |
| 25 Nucleus                    | 1H                                                  |
| 26 Acquired Size              | 32768                                               |
| 27 Spectral Size              | 65536                                               |

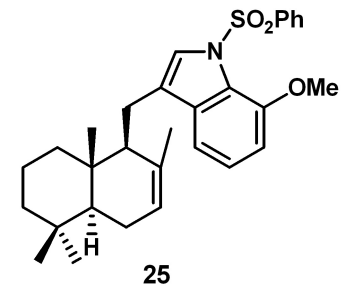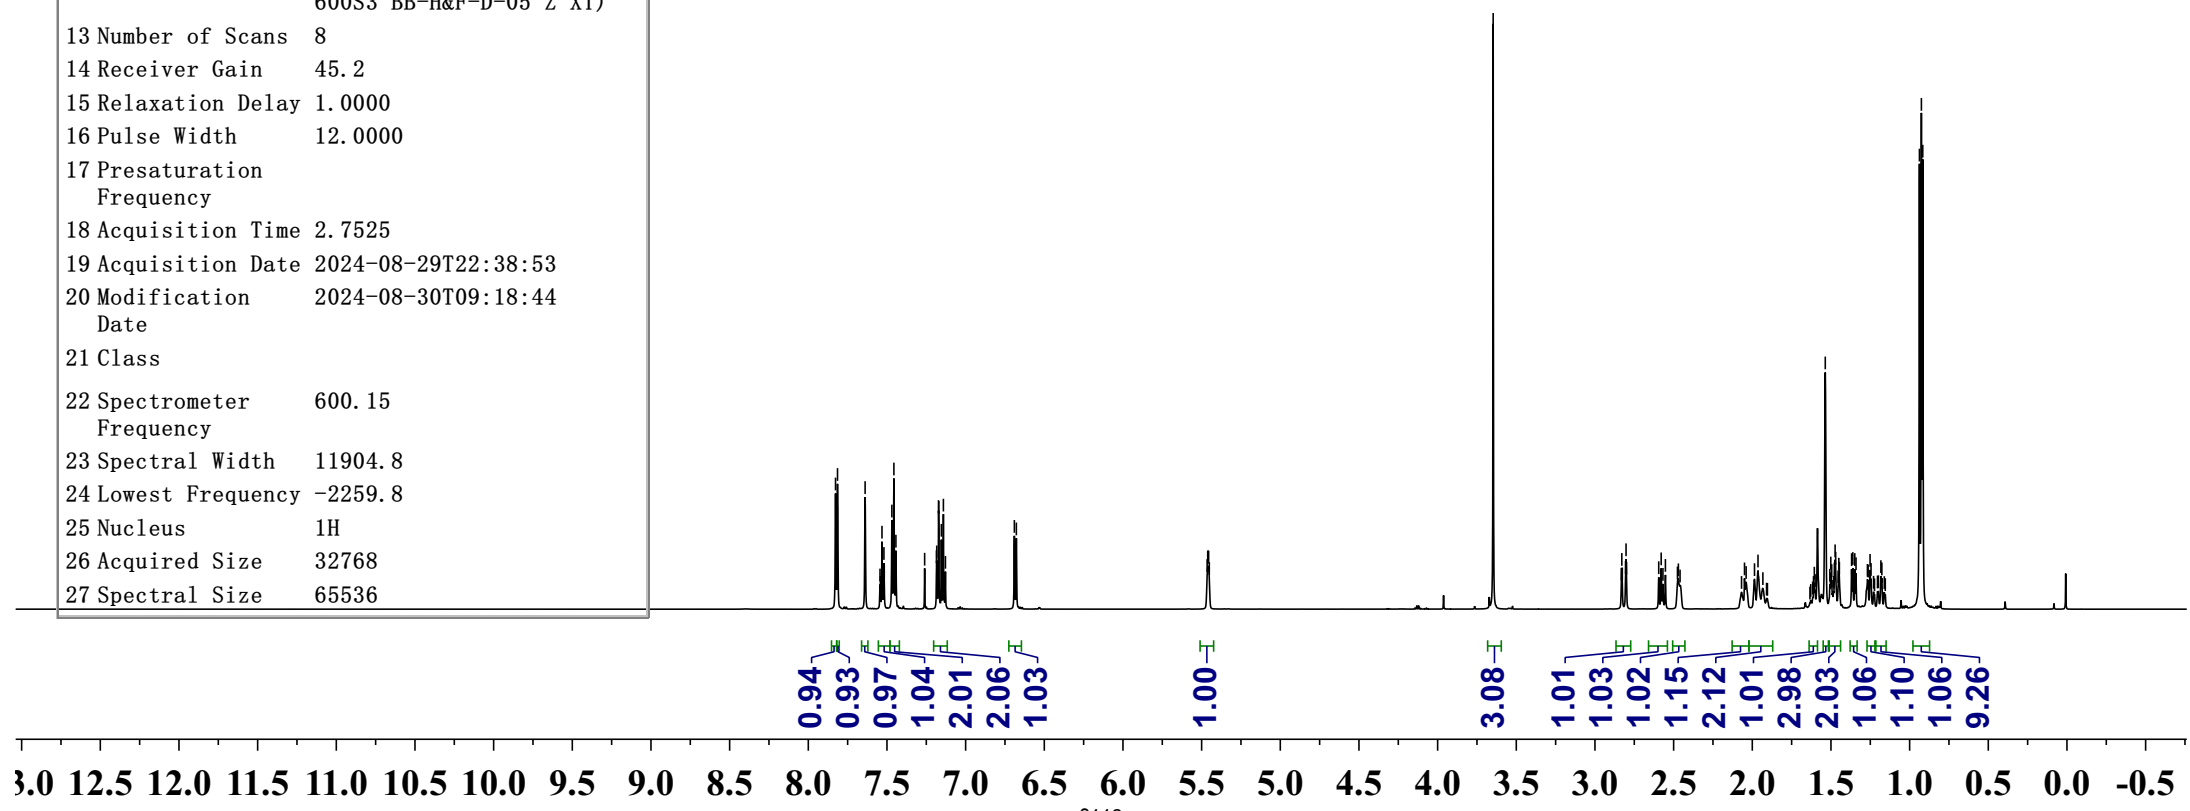

| Parameter                  | Value                                               |
|----------------------------|-----------------------------------------------------|
| 1 Title                    | YYP-<br>G-174-4-4-0829.11.1.1r                      |
| 2 Comment                  |                                                     |
| 3 Origin                   | Bruker BioSpin GmbH                                 |
| 4 Owner                    | nmrsu                                               |
| 5 Site                     |                                                     |
| 6 Instrument               | Avance NEO 600                                      |
| 7 Author                   |                                                     |
| 8 Solvent                  | CDC13                                               |
| 9 Temperature              | 298.2                                               |
| 10 Pulse Sequence          | zgpg30                                              |
| 11 Experiment              | 1D                                                  |
| 12 Probe                   | Z168773_0001 (CPP1.1 BBO<br>600S3 BB-H&F-D-05 Z XT) |
| 13 Number of Scans         | 300                                                 |
| 14 Receiver Gain           | 101.0                                               |
| 15 Relaxation Delay        | 2.0000                                              |
| 16 Pulse Width             | 10.0000                                             |
| 17 Presaturation Frequency |                                                     |
| 18 Acquisition Time        | 0.9175                                              |
| 19 Acquisition Date        | 2024-08-29T22:54:50                                 |
| 20 Modification Date       | 2024-08-30T09:18:44                                 |
| 21 Class                   |                                                     |
| 22 Spectrometer Frequency  | 150.91                                              |
| 23 Spectral Width          | 35714.3                                             |
| 24 Lowest Frequency        | -2750.3                                             |
| 25 Nucleus                 | 13C                                                 |
| 26 Acquired Size           | 32768                                               |
| 27 Spectral Size           | 32768                                               |

—147.5  
—140.7  
~134.9  
~134.2  
~133.1  
~128.8  
~127.2  
~125.6  
~124.9  
~123.9  
~123.1  
~123.0  
~112.2  
~107.1

~77.4  
~77.2  
~76.9

~55.5  
~53.6  
~50.3

~42.4  
~39.7  
~37.0  
~33.4  
~33.2

~24.0  
~22.8  
~22.1  
~19.0  
~13.8

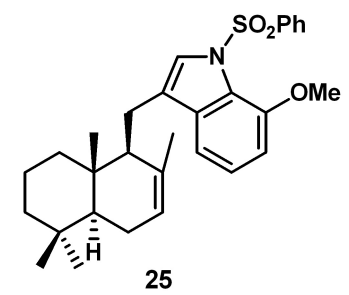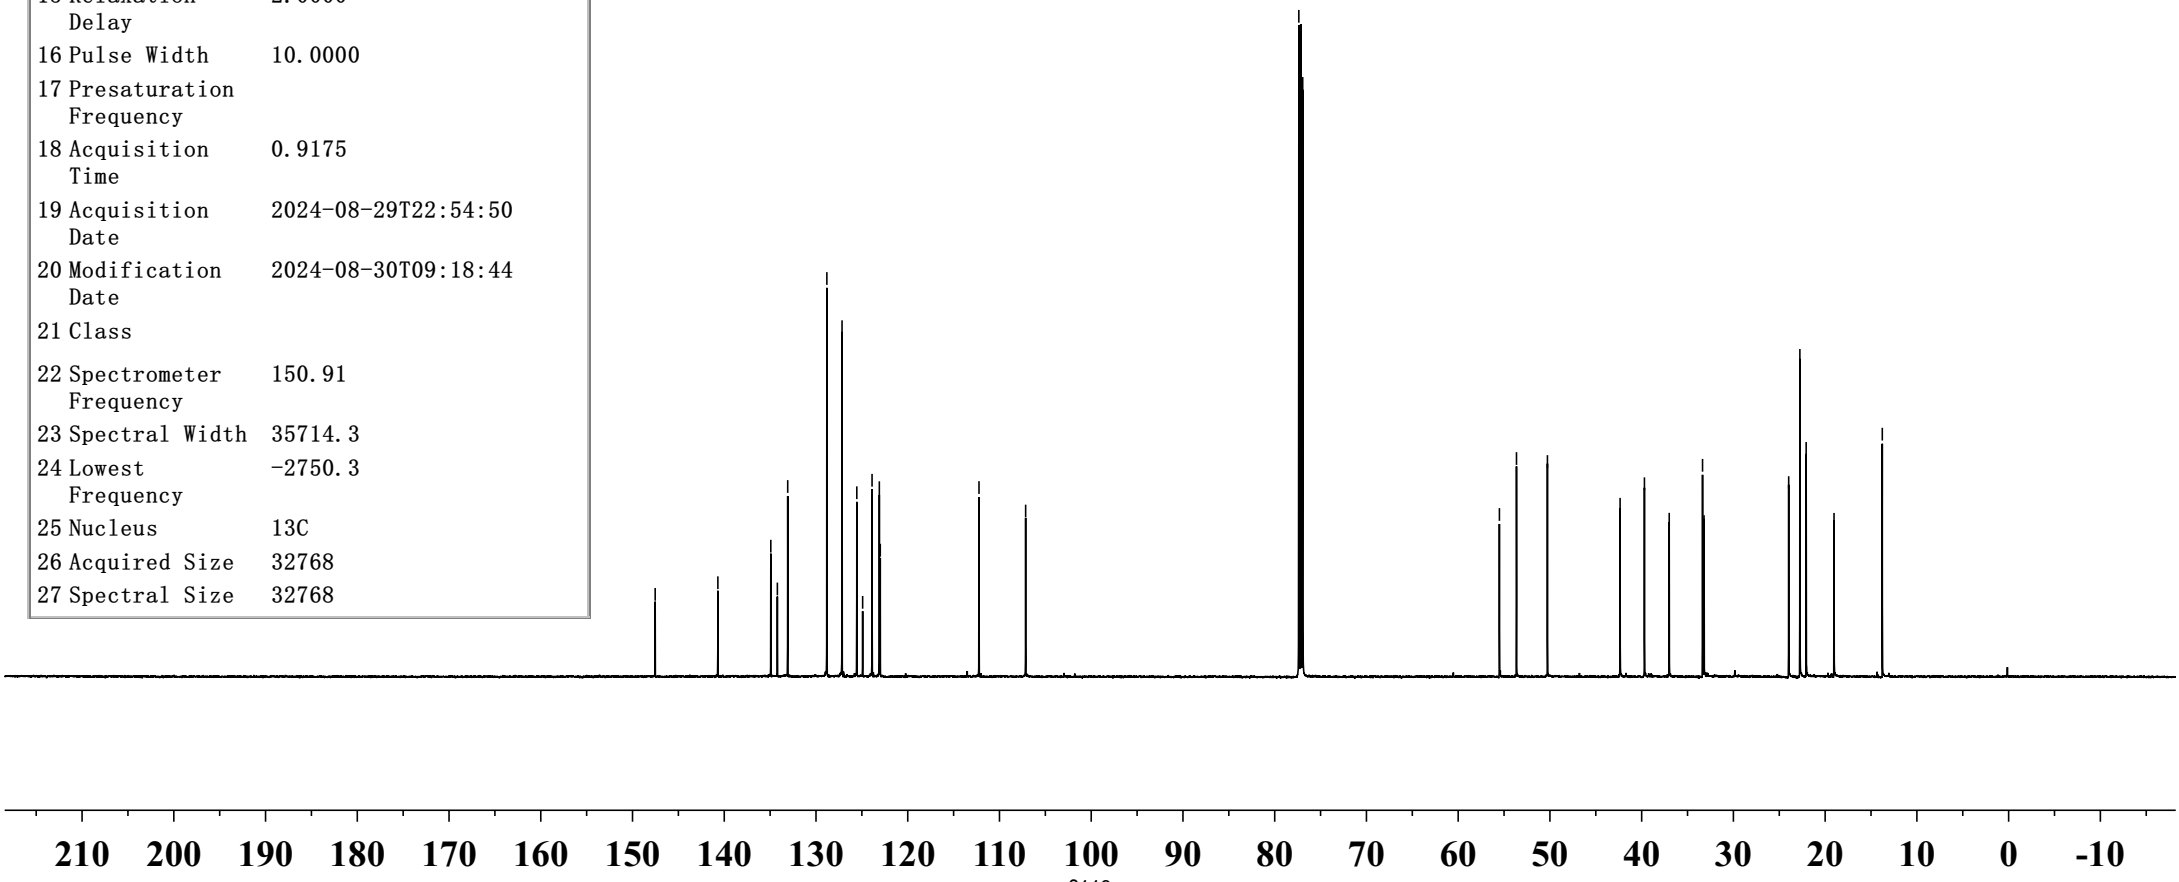

7.92  
7.92  
7.91  
7.90  
7.89  
7.54  
7.54  
7.53  
7.52  
7.52  
7.51  
7.50  
7.47  
7.47  
7.45  
7.45  
7.45  
7.43  
7.43  
7.42  
7.26  
7.26  
6.88  
6.86  
6.63  
6.61  
3.68  
2.93  
2.92  
2.89  
2.88  
2.65  
2.64  
2.62  
2.61  
2.60  
2.58  
2.57  
2.43  
2.42  
2.41  
2.40  
2.39  
2.39  
1.87  
1.86  
1.84  
1.75  
1.74  
1.72  
1.71  
1.70  
1.69  
1.68  
1.65  
1.64  
1.62  
1.61  
1.54  
1.53  
1.51  
1.50  
1.49  
1.49  
1.48  
1.47  
1.46  
1.45  
1.44  
1.44  
1.38  
1.37  
1.12  
1.04  
0.91  
0.90  
0.90  
0.88

| Parameter                  | Value                                            |
|----------------------------|--------------------------------------------------|
| 1 Title                    | YYP-G-175-2-1-0904-1.10.1.1r                     |
| 2 Comment                  |                                                  |
| 3 Origin                   | Bruker BioSpin GmbH                              |
| 4 Owner                    | nmsu                                             |
| 5 Site                     |                                                  |
| 6 Instrument               | Avance Neo 400M                                  |
| 7 Author                   |                                                  |
| 8 Solvent                  | CDCl3                                            |
| 9 Temperature              | 298.1                                            |
| 10 Pulse Sequence          | zg30                                             |
| 11 Experiment              | 1D                                               |
| 12 Probe                   | Z163739_0254 (PI HR-BB0400S1-BBF/ H/ D-5.0-Z SP) |
| 13 Number of Scans         | 16                                               |
| 14 Receiver Gain           | 101.0                                            |
| 15 Relaxation Delay        | 1.0000                                           |
| 16 Pulse Width             | 8.0000                                           |
| 17 Presaturation Frequency |                                                  |
| 18 Acquisition Time        | 3.9977                                           |
| 19 Acquisition Date        | 2024-09-04T22:47:42                              |
| 20 Modification Date       | 2024-09-05T09:30:06                              |
| 21 Class                   |                                                  |
| 22 Spectrometer Frequency  | 400.18                                           |
| 23 Spectral Width          | 8196.7                                           |
| 24 Lowest Frequency        | -1636.8                                          |
| 25 Nucleus                 | 1H                                               |
| 26 Acquired Size           | 32768                                            |
| 27 Spectral Size           | 65536                                            |

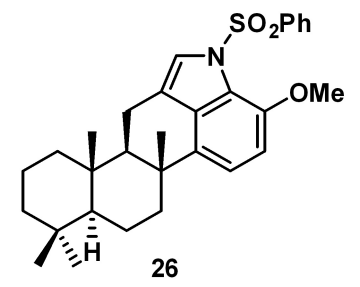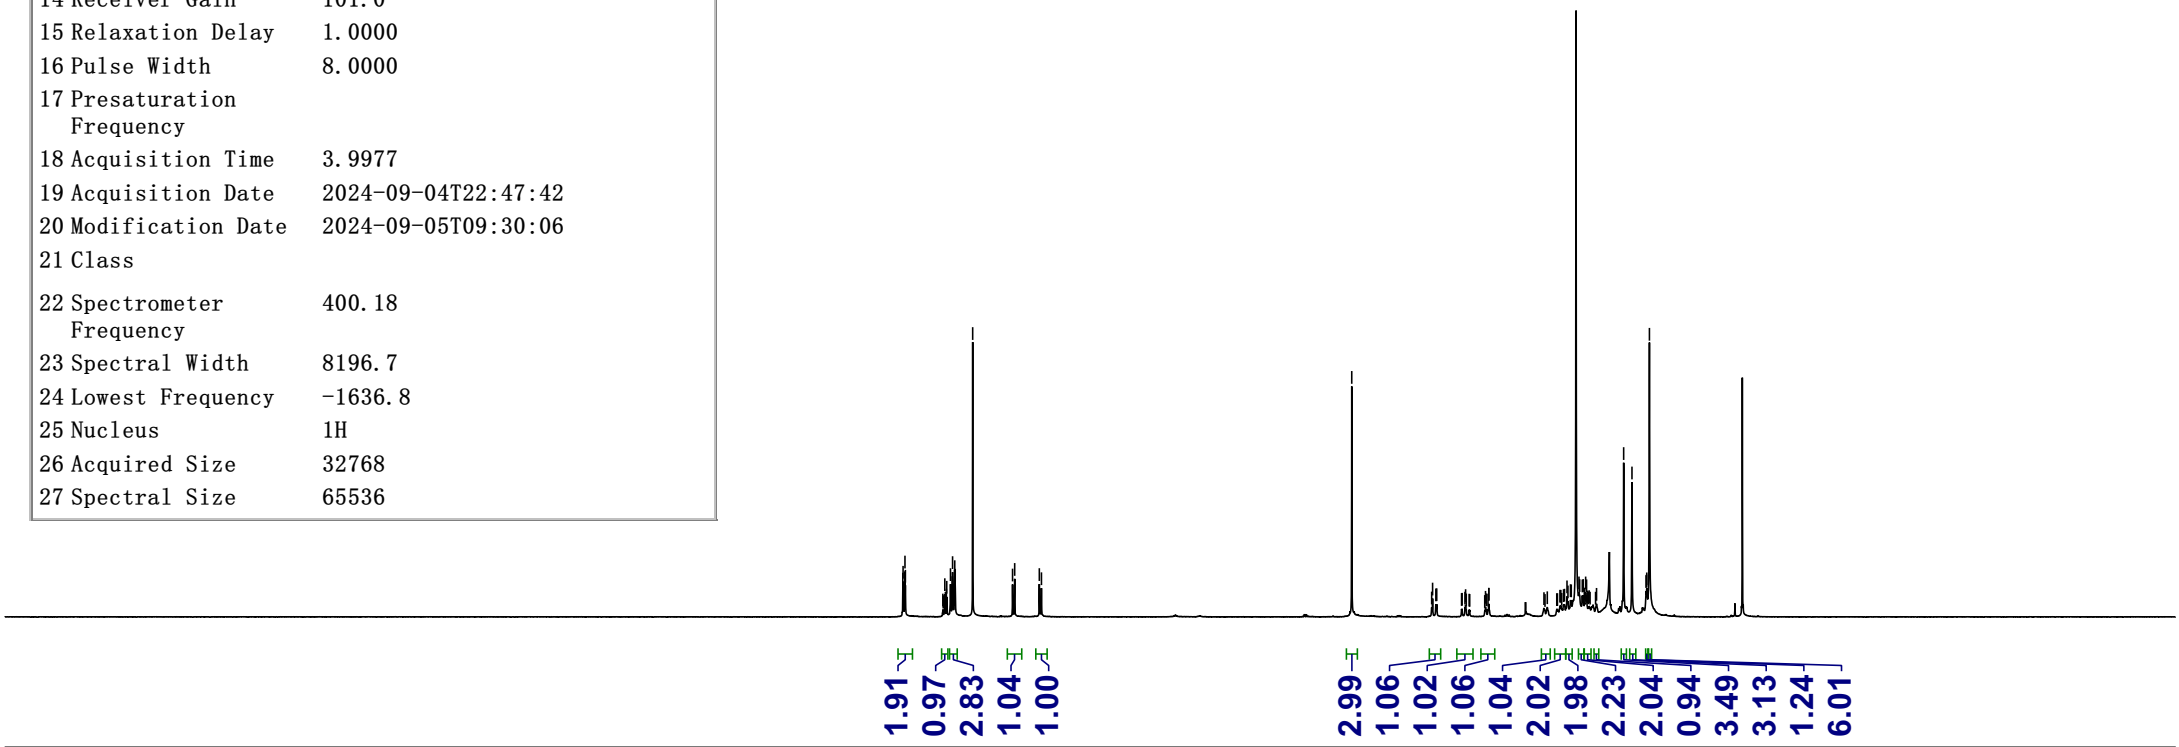

| Parameter                  | Value                                               |
|----------------------------|-----------------------------------------------------|
| 1 Title                    | YYP-<br>G-175-2-1-0904.11.1.1r                      |
| 2 Comment                  |                                                     |
| 3 Origin                   | Bruker BioSpin GmbH                                 |
| 4 Owner                    | nmrsu                                               |
| 5 Site                     |                                                     |
| 6 Instrument               | Avance NEO 600                                      |
| 7 Author                   |                                                     |
| 8 Solvent                  | CDC13                                               |
| 9 Temperature              | 298.2                                               |
| 10 Pulse Sequence          | zgpg30                                              |
| 11 Experiment              | 1D                                                  |
| 12 Probe                   | Z168773_0001 (CPP1.1 BBO<br>600S3 BB-H&F-D-05 Z XT) |
| 13 Number of Scans         | 251                                                 |
| 14 Receiver Gain           | 101.0                                               |
| 15 Relaxation Delay        | 2.0000                                              |
| 16 Pulse Width             | 10.0000                                             |
| 17 Presaturation Frequency |                                                     |
| 18 Acquisition Time        | 0.9175                                              |
| 19 Acquisition Date        | 2024-09-04T14:47:13                                 |
| 20 Modification Date       | 2024-09-04T14:56:02                                 |
| 21 Class                   |                                                     |
| 22 Spectrometer Frequency  | 150.91                                              |
| 23 Spectral Width          | 35714.3                                             |
| 24 Lowest Frequency        | -2746.1                                             |
| 25 Nucleus                 | 13C                                                 |
| 26 Acquired Size           | 32768                                               |
| 27 Spectral Size           | 32768                                               |

145.2  
140.4  
138.7  
133.1  
130.8  
128.8  
127.7  
122.4  
121.5  
118.7  
116.6  
108.0

77.4  
77.2  
76.9

56.7  
56.5  
56.0  
42.0  
40.3  
39.0  
38.2  
37.3  
33.6  
33.5  
25.1  
21.7  
18.9  
18.8  
18.1  
16.4

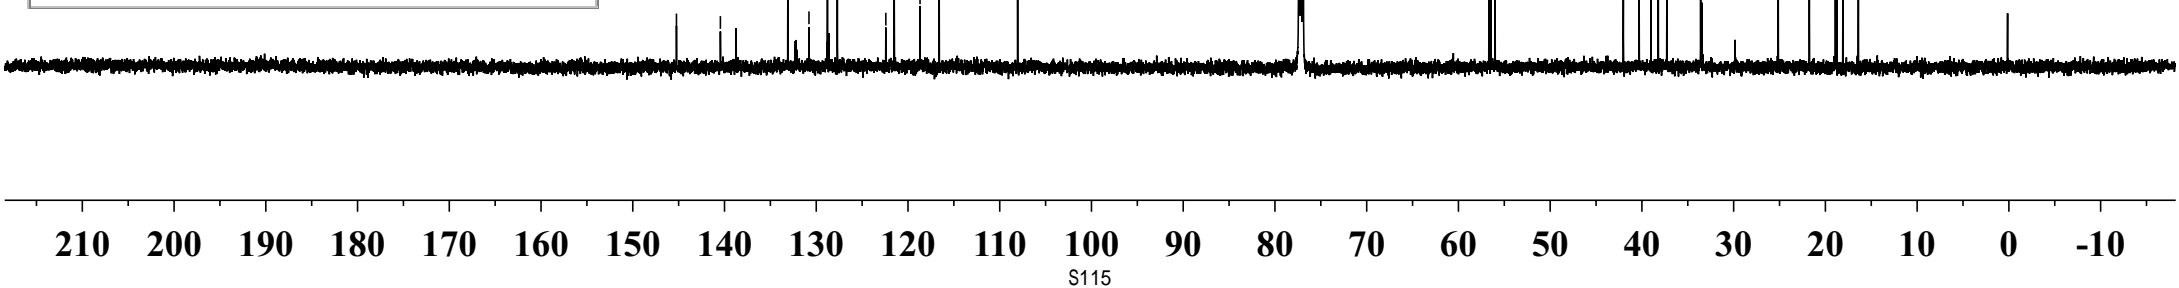

| Parameter                     | Value                                                  |
|-------------------------------|--------------------------------------------------------|
| 1 Title                       | YYP-F-098-1-1.10.1.1r                                  |
| 2 Comment                     |                                                        |
| 3 Origin                      | Bruker BioSpin GmbH                                    |
| 4 Owner                       | nmrsu                                                  |
| 5 Site                        |                                                        |
| 6 Instrument                  | Avance NEO 600                                         |
| 7 Author                      |                                                        |
| 8 Solvent                     | CDC13                                                  |
| 9 Temperature                 | 298.0                                                  |
| 10 Pulse Sequence             | zg30                                                   |
| 11 Experiment                 | 1D                                                     |
| 12 Probe                      | Z168773_0027 (CPP1.1<br>BB0 600S3 BB-H&F-D-05 Z<br>XT) |
| 13 Number of Scans            | 2                                                      |
| 14 Receiver Gain              | 71.8                                                   |
| 15 Relaxation Delay           | 1.0000                                                 |
| 16 Pulse Width                | 11.1300                                                |
| 17 Presaturation<br>Frequency |                                                        |
| 18 Acquisition Time           | 2.7525                                                 |
| 19 Acquisition Date           | 2023-05-05T22:09:24                                    |
| 20 Modification Date          | 2023-05-06T09:05:20                                    |
| 21 Class                      |                                                        |
| 22 Spectrometer<br>Frequency  | 600.15                                                 |
| 23 Spectral Width             | 11904.8                                                |
| 24 Lowest Frequency           | -2260.5                                                |
| 25 Nucleus                    | <sup>1</sup> H                                         |
| 26 Acquired Size              | 32768                                                  |
| 27 Spectral Size              | 65536                                                  |

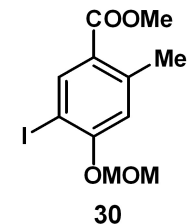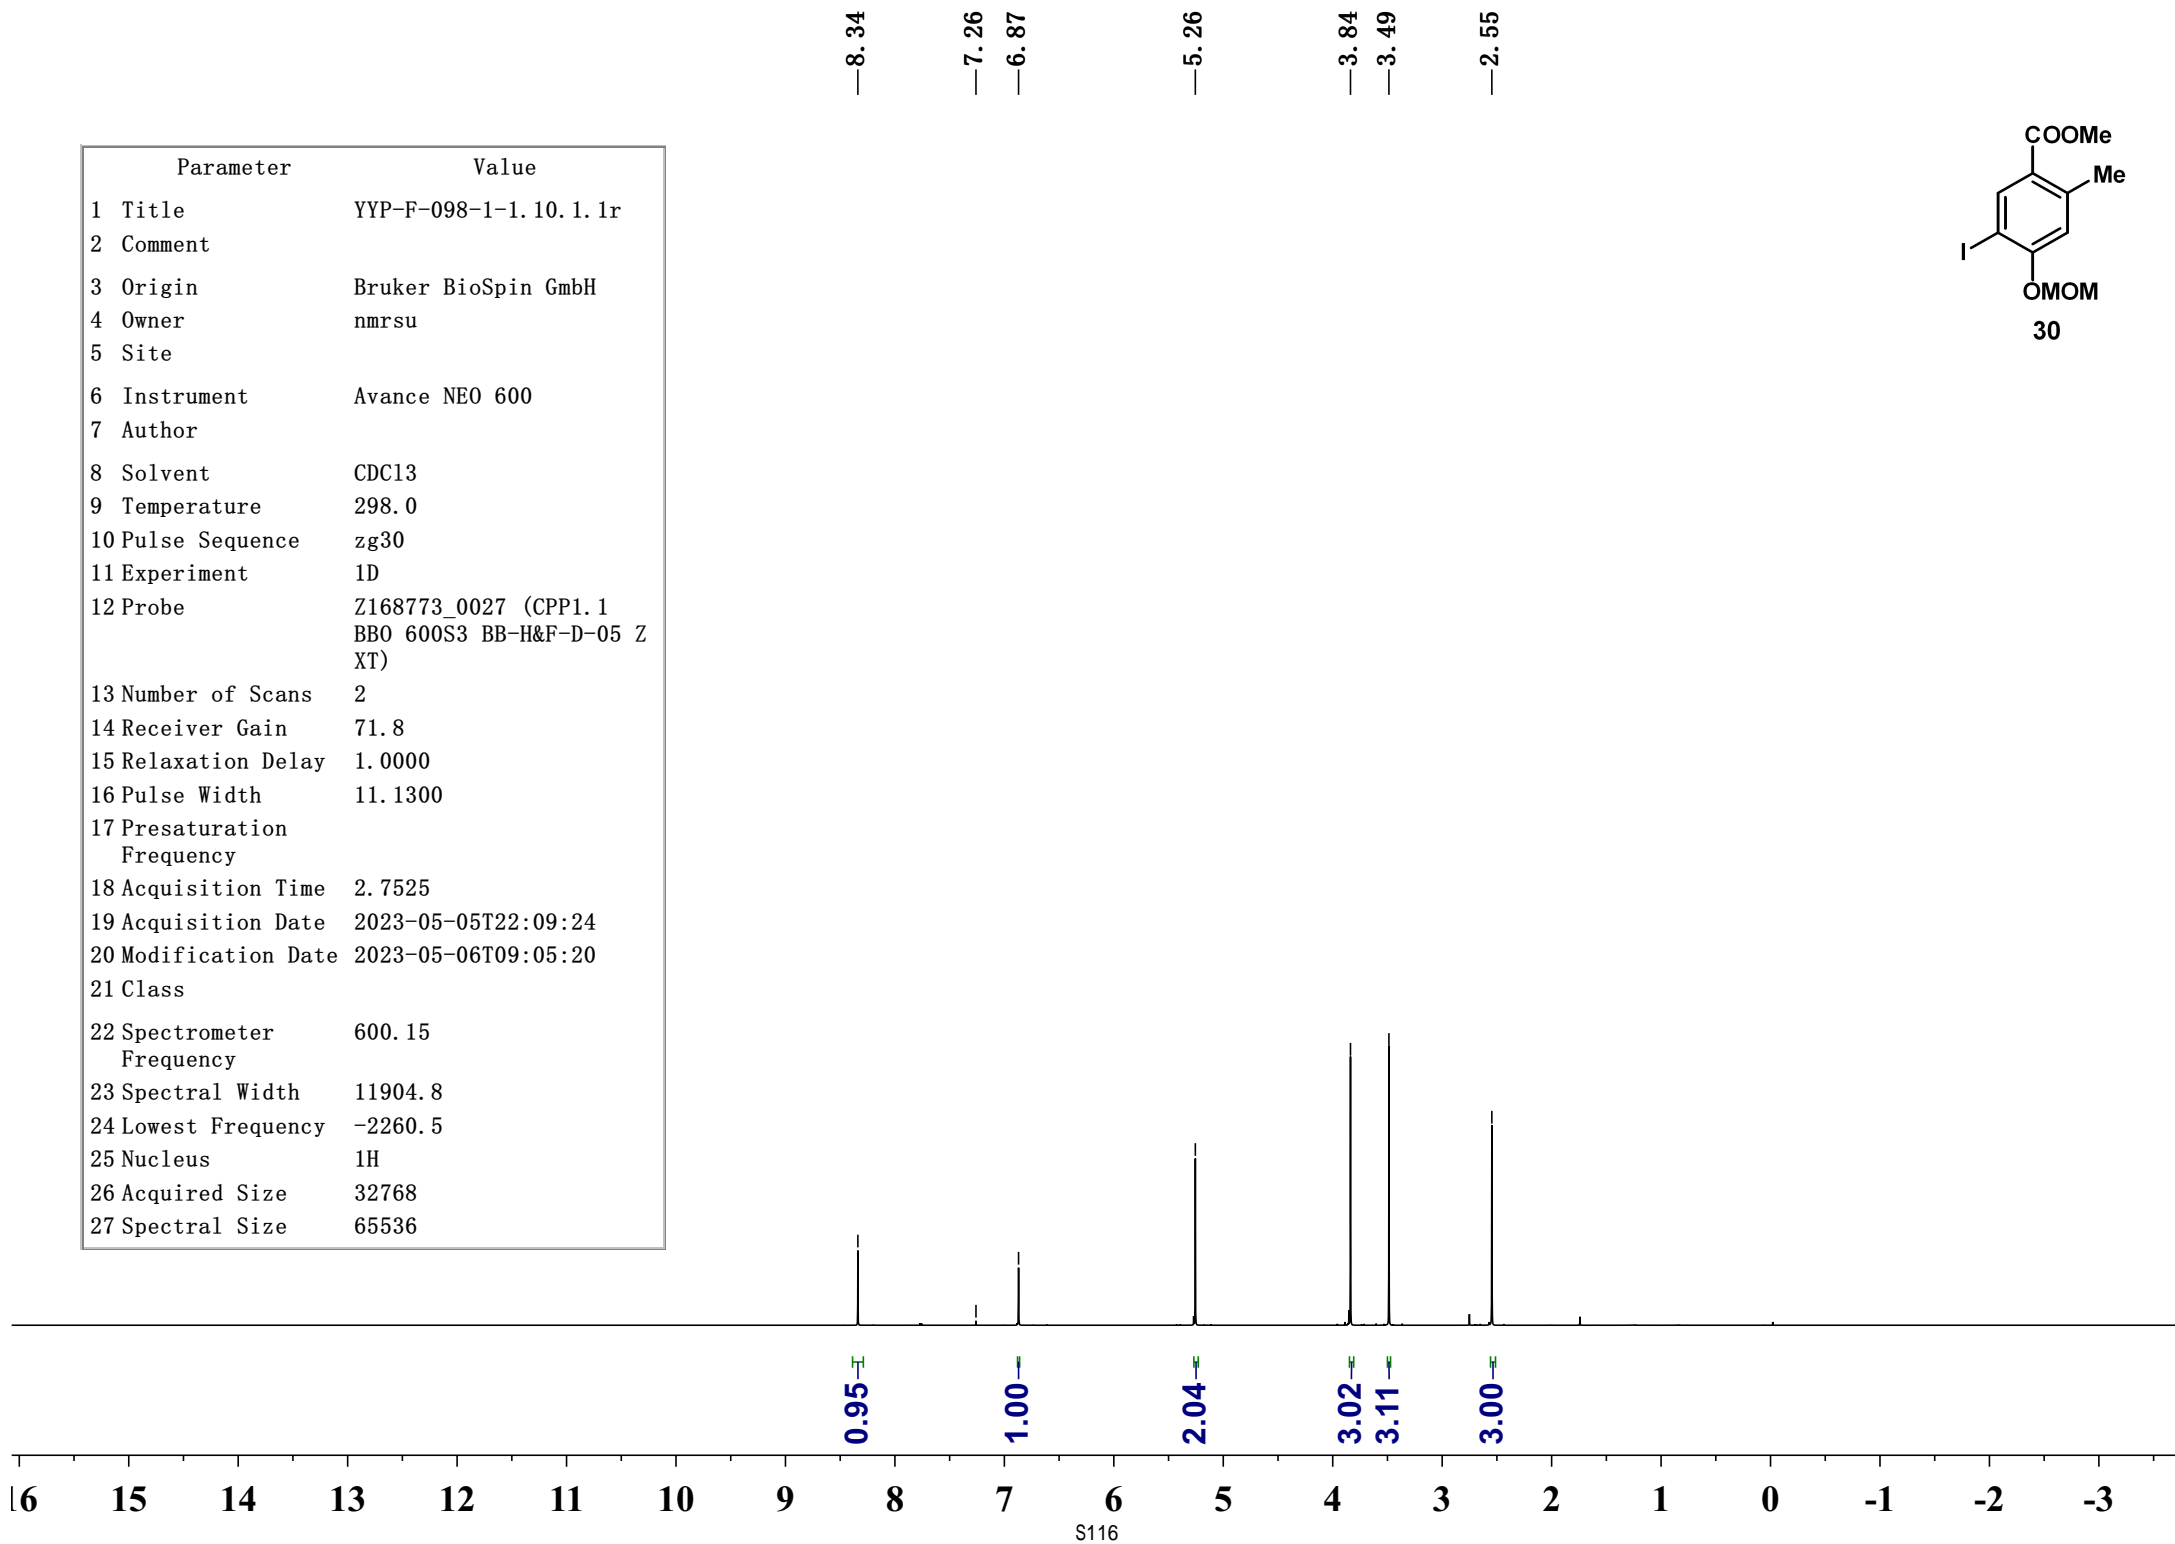



| Parameter                     | Value                                                  |
|-------------------------------|--------------------------------------------------------|
| 1 Title                       | YYP-F-098-1-1.11.1.1r                                  |
| 2 Comment                     |                                                        |
| 3 Origin                      | Bruker BioSpin GmbH                                    |
| 4 Owner                       | nmrsu                                                  |
| 5 Site                        |                                                        |
| 6 Instrument                  | Avance NEO 600                                         |
| 7 Author                      |                                                        |
| 8 Solvent                     | CDC13                                                  |
| 9 Temperature                 | 298.0                                                  |
| 10 Pulse Sequence             | zgpg30                                                 |
| 11 Experiment                 | 1D                                                     |
| 12 Probe                      | Z168773_0027 (CPP1.1<br>BBO 600S3 BB-H&F-D-05 Z<br>XT) |
| 13 Number of Scans            | 30                                                     |
| 14 Receiver Gain              | 101.0                                                  |
| 15 Relaxation Delay           | 2.0000                                                 |
| 16 Pulse Width                | 9.8900                                                 |
| 17 Presaturation<br>Frequency |                                                        |
| 18 Acquisition Time           | 0.9175                                                 |
| 19 Acquisition Date           | 2023-05-05T22:11:39                                    |
| 20 Modification Date          | 2023-05-06T09:05:20                                    |
| 21 Class                      |                                                        |
| 22 Spectrometer<br>Frequency  | 150.91                                                 |
| 23 Spectral Width             | 35714.3                                                |
| 24 Lowest Frequency           | -2759.1                                                |
| 25 Nucleus                    | 13C                                                    |
| 26 Acquired Size              | 32768                                                  |
| 27 Spectral Size              | 32768                                                  |

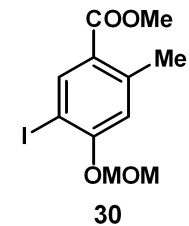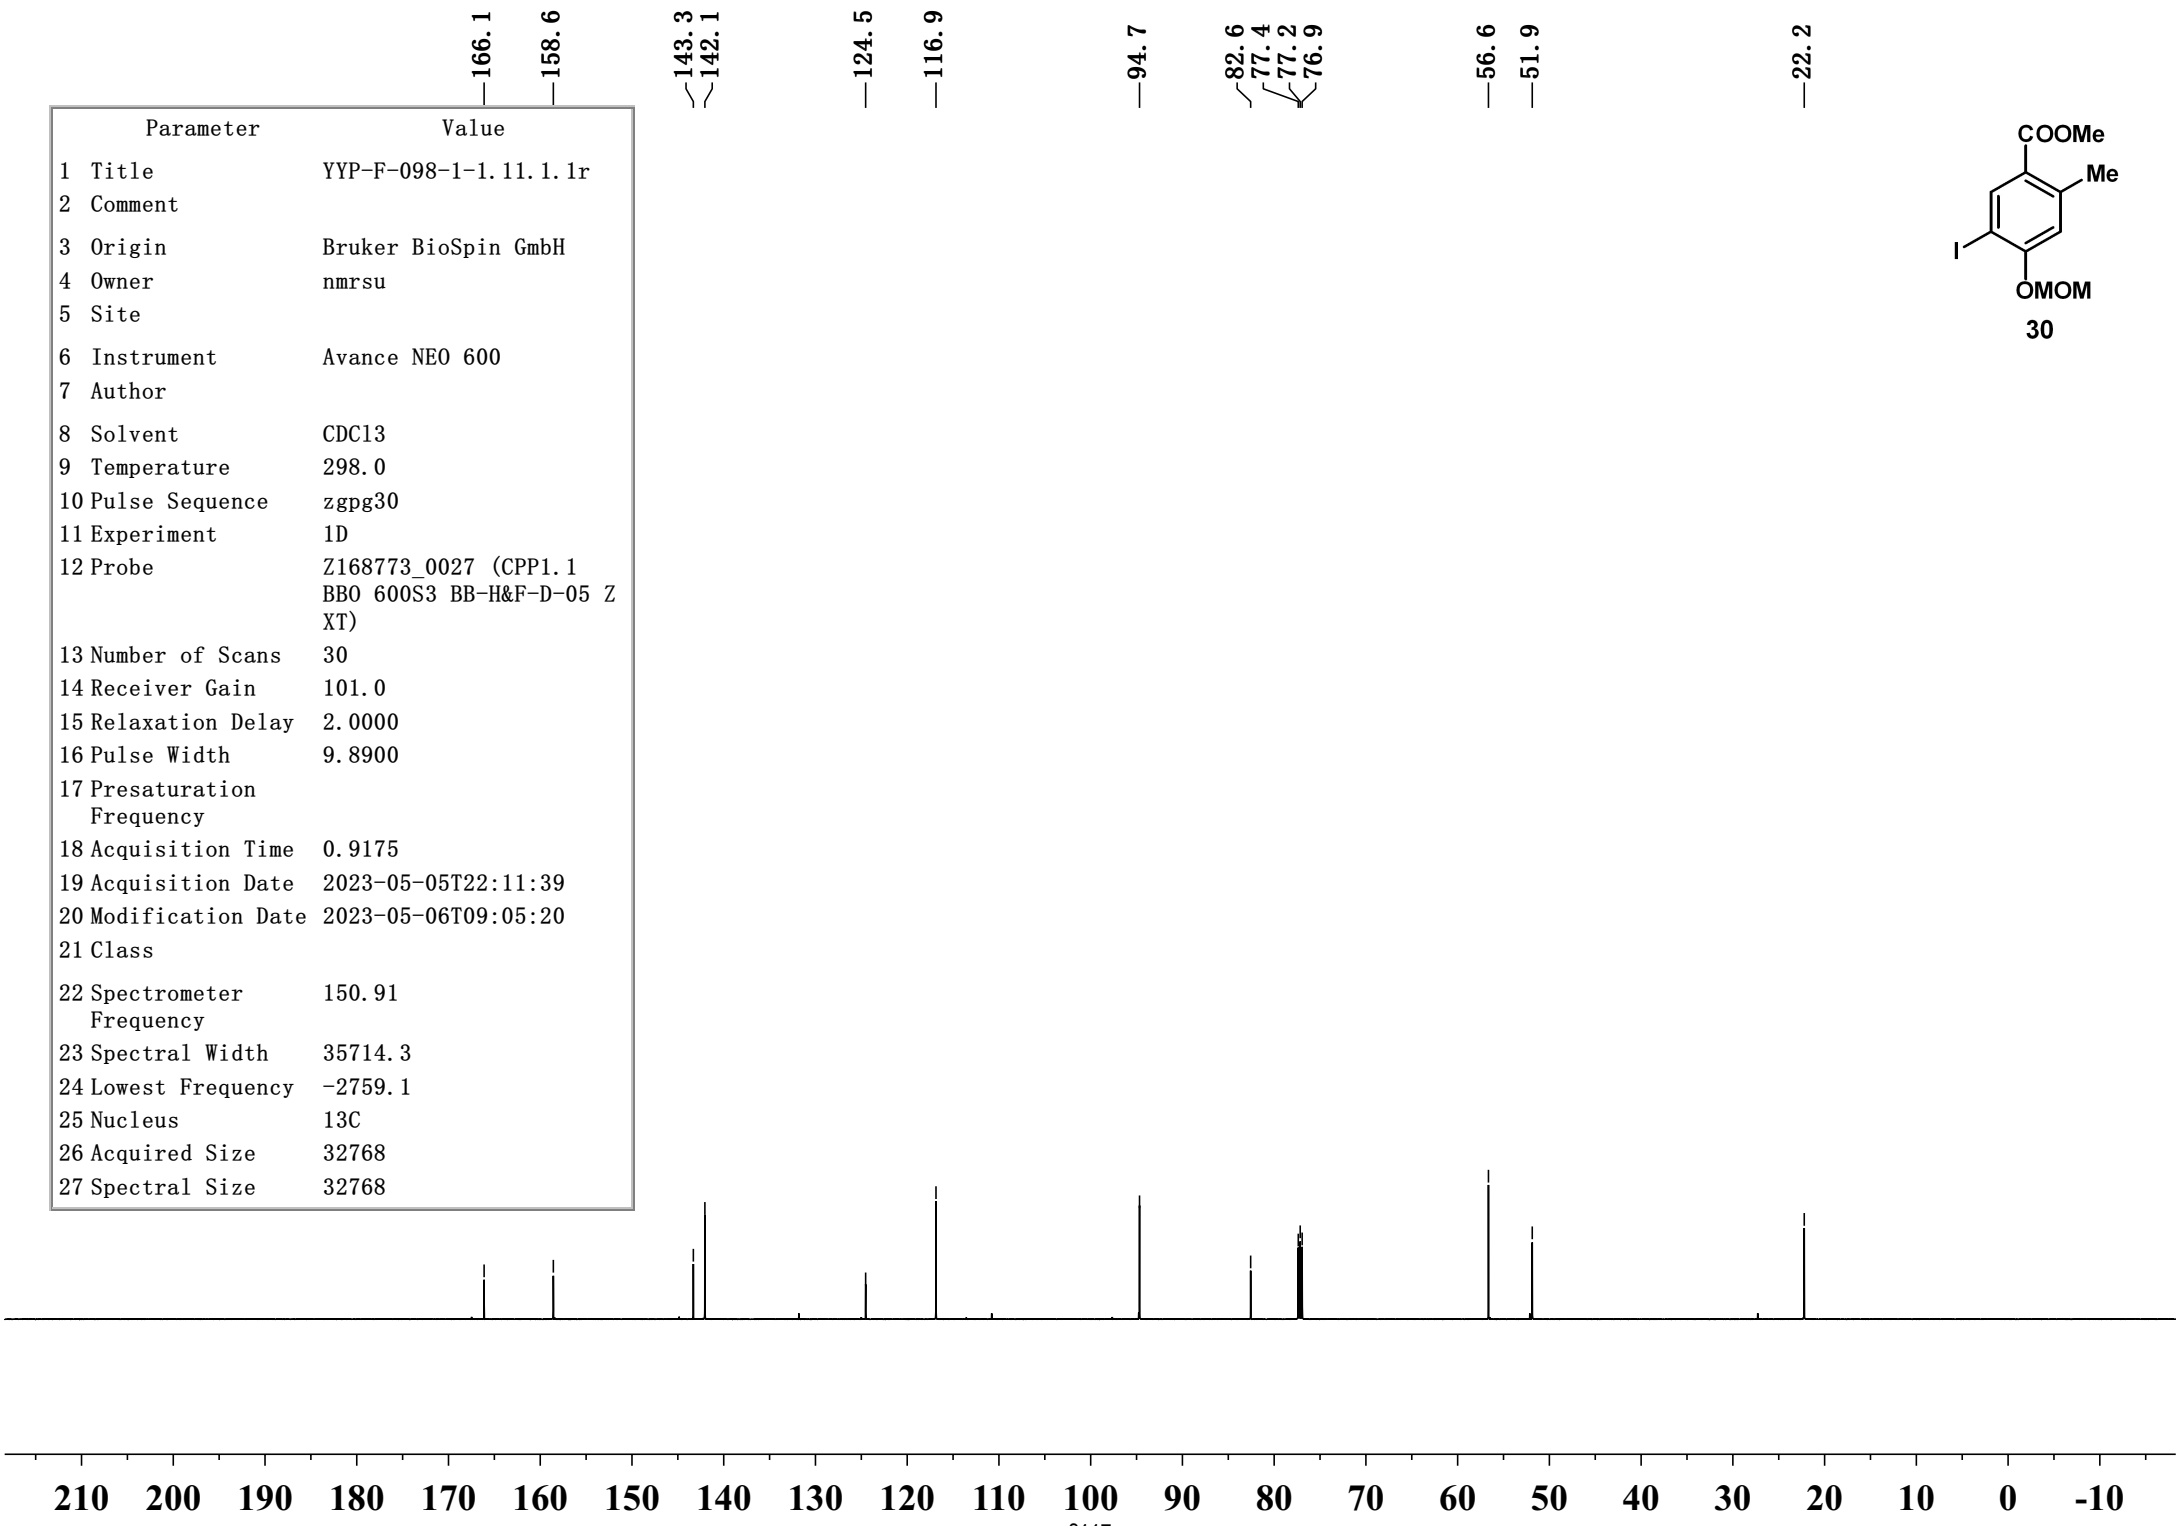

| Parameter                     | Value                                                  |
|-------------------------------|--------------------------------------------------------|
| 1 Title                       | YYP-F-091-3-2.10.1.1r                                  |
| 2 Comment                     |                                                        |
| 3 Origin                      | Bruker BioSpin GmbH                                    |
| 4 Owner                       | nrmrsu                                                 |
| 5 Site                        |                                                        |
| 6 Instrument                  | Avance NEO 600                                         |
| 7 Author                      |                                                        |
| 8 Solvent                     | CDC13                                                  |
| 9 Temperature                 | 298.1                                                  |
| 10 Pulse Sequence             | zg30                                                   |
| 11 Experiment                 | 1D                                                     |
| 12 Probe                      | Z168773_0027 (CPP1.1<br>BBO 600S3 BB-H&F-D-05 Z<br>XT) |
| 13 Number of Scans            | 2                                                      |
| 14 Receiver Gain              | 101.0                                                  |
| 15 Relaxation Delay           | 1.0000                                                 |
| 16 Pulse Width                | 11.1300                                                |
| 17 Presaturation<br>Frequency |                                                        |
| 18 Acquisition Time           | 2.7525                                                 |
| 19 Acquisition Date           | 2023-05-08T19:01:10                                    |
| 20 Modification Date          | 2023-05-08T19:15:43                                    |
| 21 Class                      |                                                        |
| 22 Spectrometer<br>Frequency  | 600.15                                                 |
| 23 Spectral Width             | 11904.8                                                |
| 24 Lowest Frequency           | -2260.8                                                |
| 25 Nucleus                    | <sup>1</sup> H                                         |
| 26 Acquired Size              | 32768                                                  |
| 27 Spectral Size              | 65536                                                  |

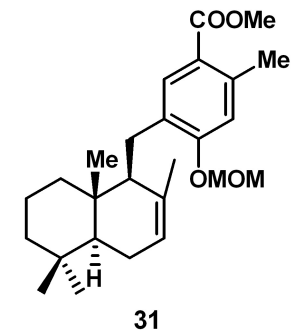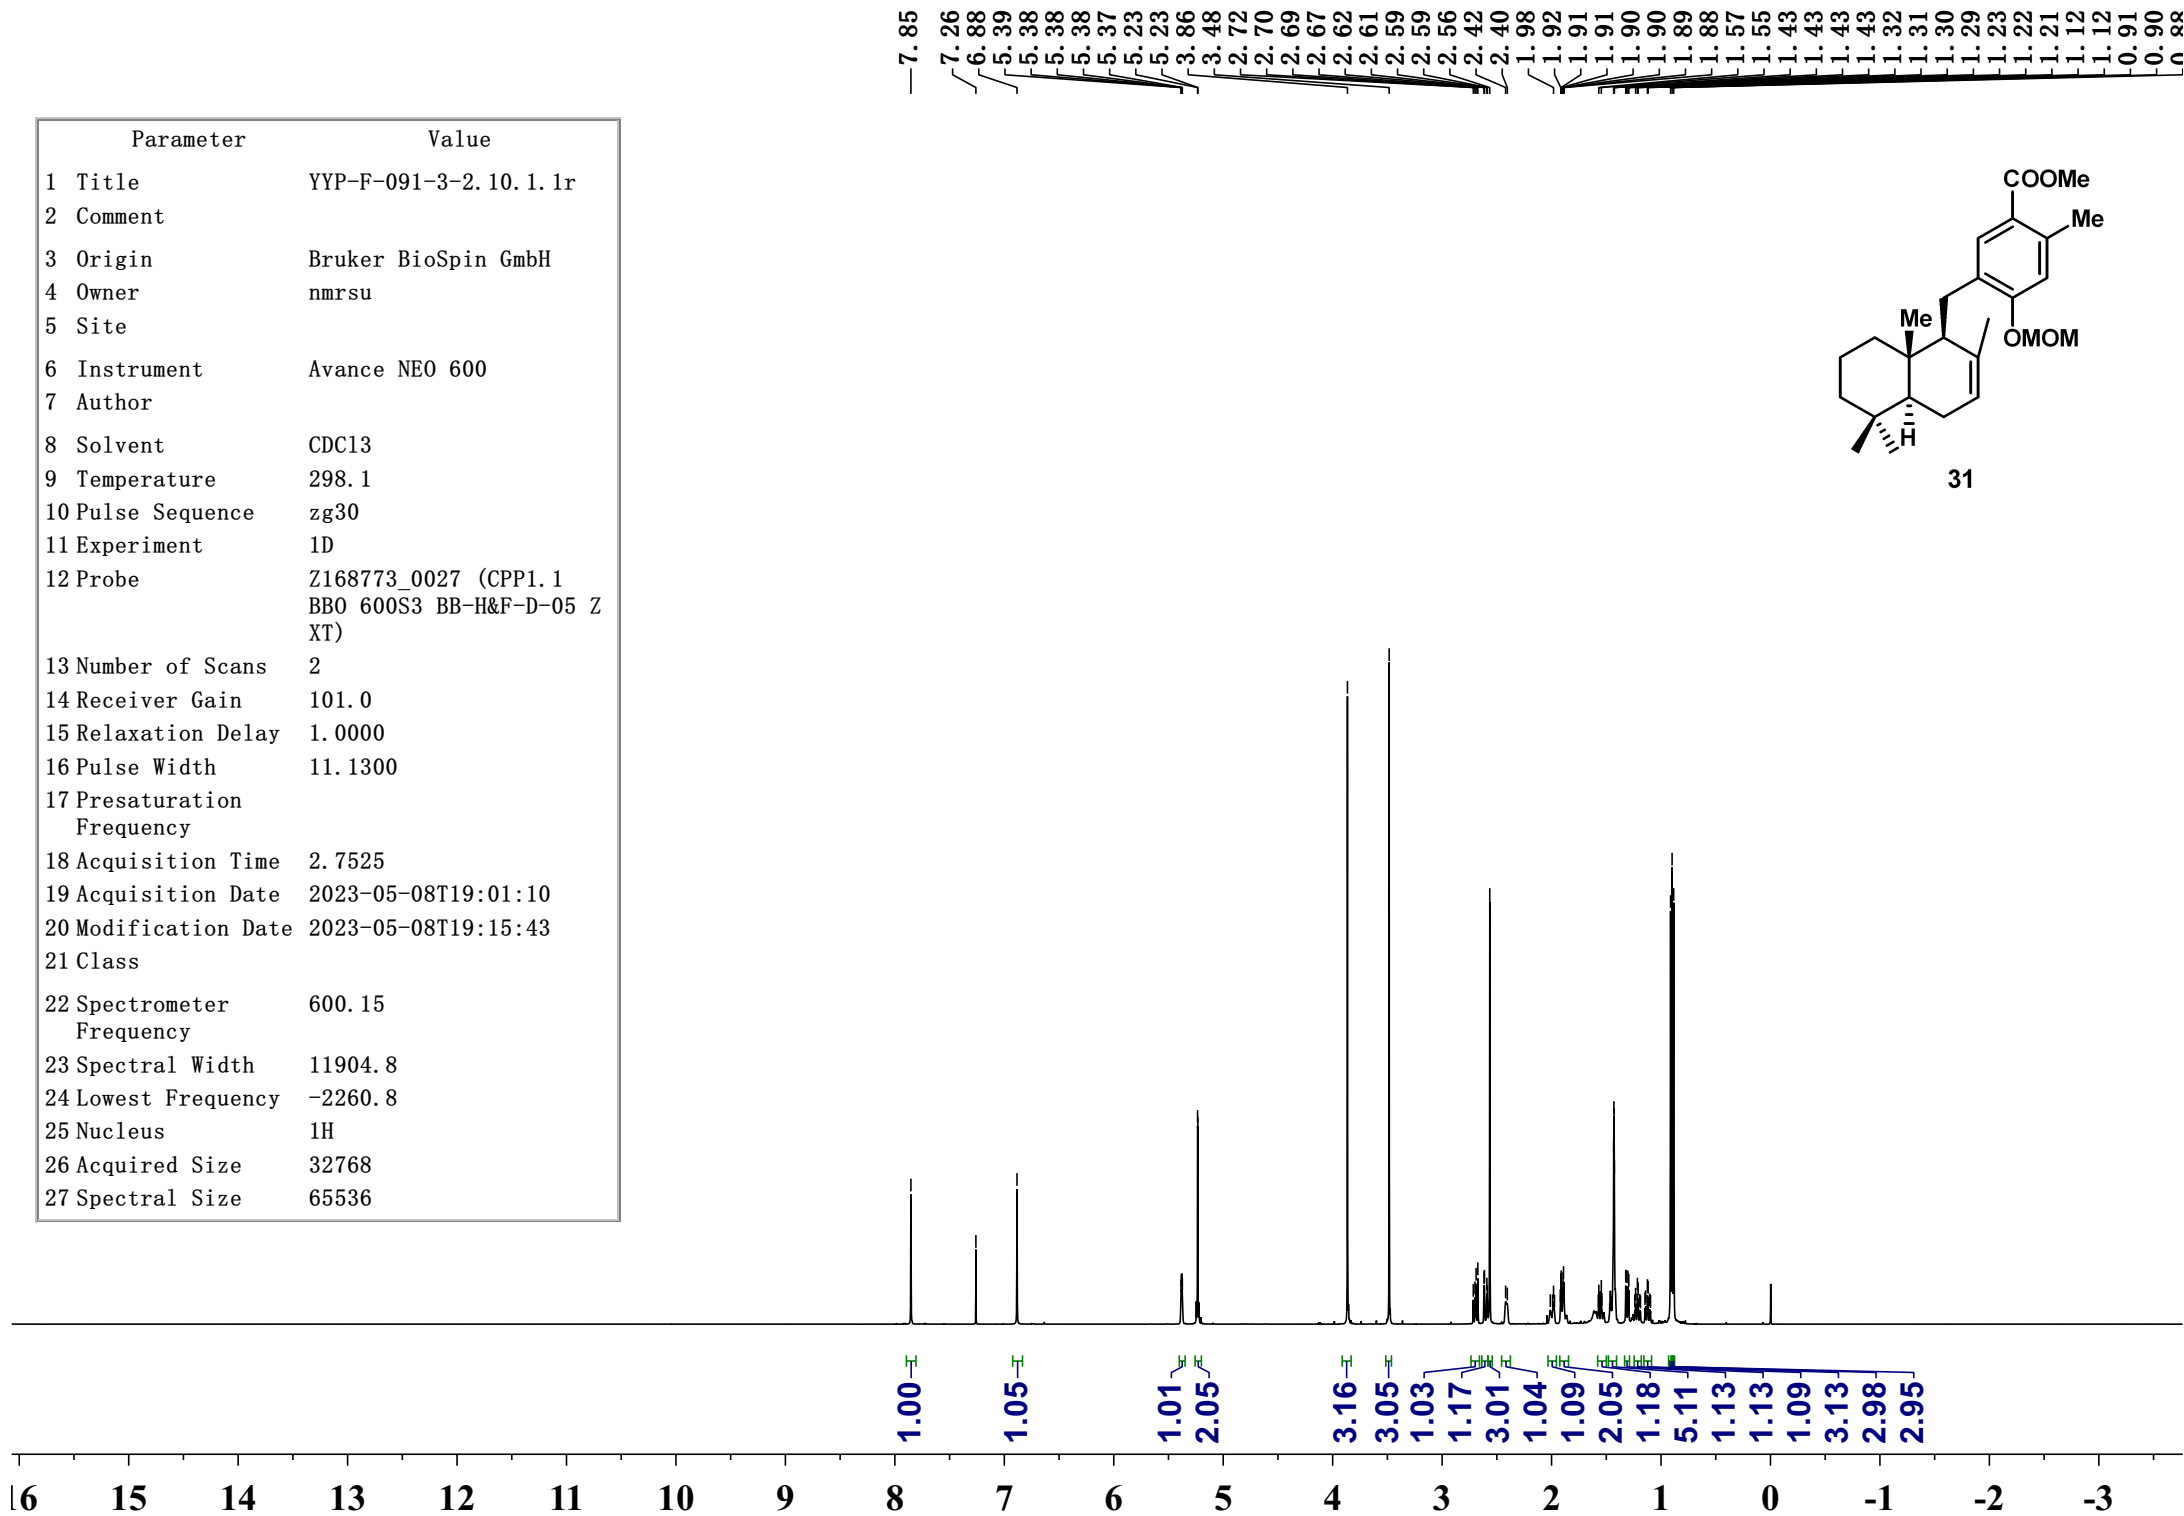

| Parameter                     | Value                                                  |
|-------------------------------|--------------------------------------------------------|
| 1 Title                       | YYP-F-091-3-2.11.1.1r                                  |
| 2 Comment                     |                                                        |
| 3 Origin                      | Bruker BioSpin GmbH                                    |
| 4 Owner                       | nmrsu                                                  |
| 5 Site                        |                                                        |
| 6 Instrument                  | Avance NEO 600                                         |
| 7 Author                      |                                                        |
| 8 Solvent                     | CDC13                                                  |
| 9 Temperature                 | 298.1                                                  |
| 10 Pulse Sequence             | zgpg30                                                 |
| 11 Experiment                 | 1D                                                     |
| 12 Probe                      | Z168773_0027 (CPP1.1<br>BBO 600S3 BB-H&F-D-05 Z<br>XT) |
| 13 Number of Scans            | 26                                                     |
| 14 Receiver Gain              | 101.0                                                  |
| 15 Relaxation Delay           | 2.0000                                                 |
| 16 Pulse Width                | 9.8900                                                 |
| 17 Presaturation<br>Frequency |                                                        |
| 18 Acquisition Time           | 0.9175                                                 |
| 19 Acquisition Date           | 2023-05-08T19:03:13                                    |
| 20 Modification Date          | 2023-05-08T19:15:44                                    |
| 21 Class                      |                                                        |
| 22 Spectrometer<br>Frequency  | 150.91                                                 |
| 23 Spectral Width             | 35714.3                                                |
| 24 Lowest Frequency           | -2747.0                                                |
| 25 Nucleus                    | 13C                                                    |
| 26 Acquired Size              | 32768                                                  |
| 27 Spectral Size              | 32768                                                  |

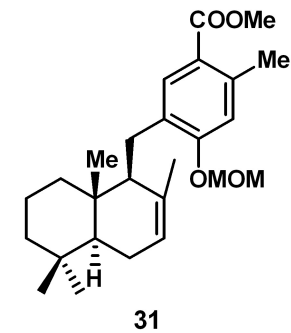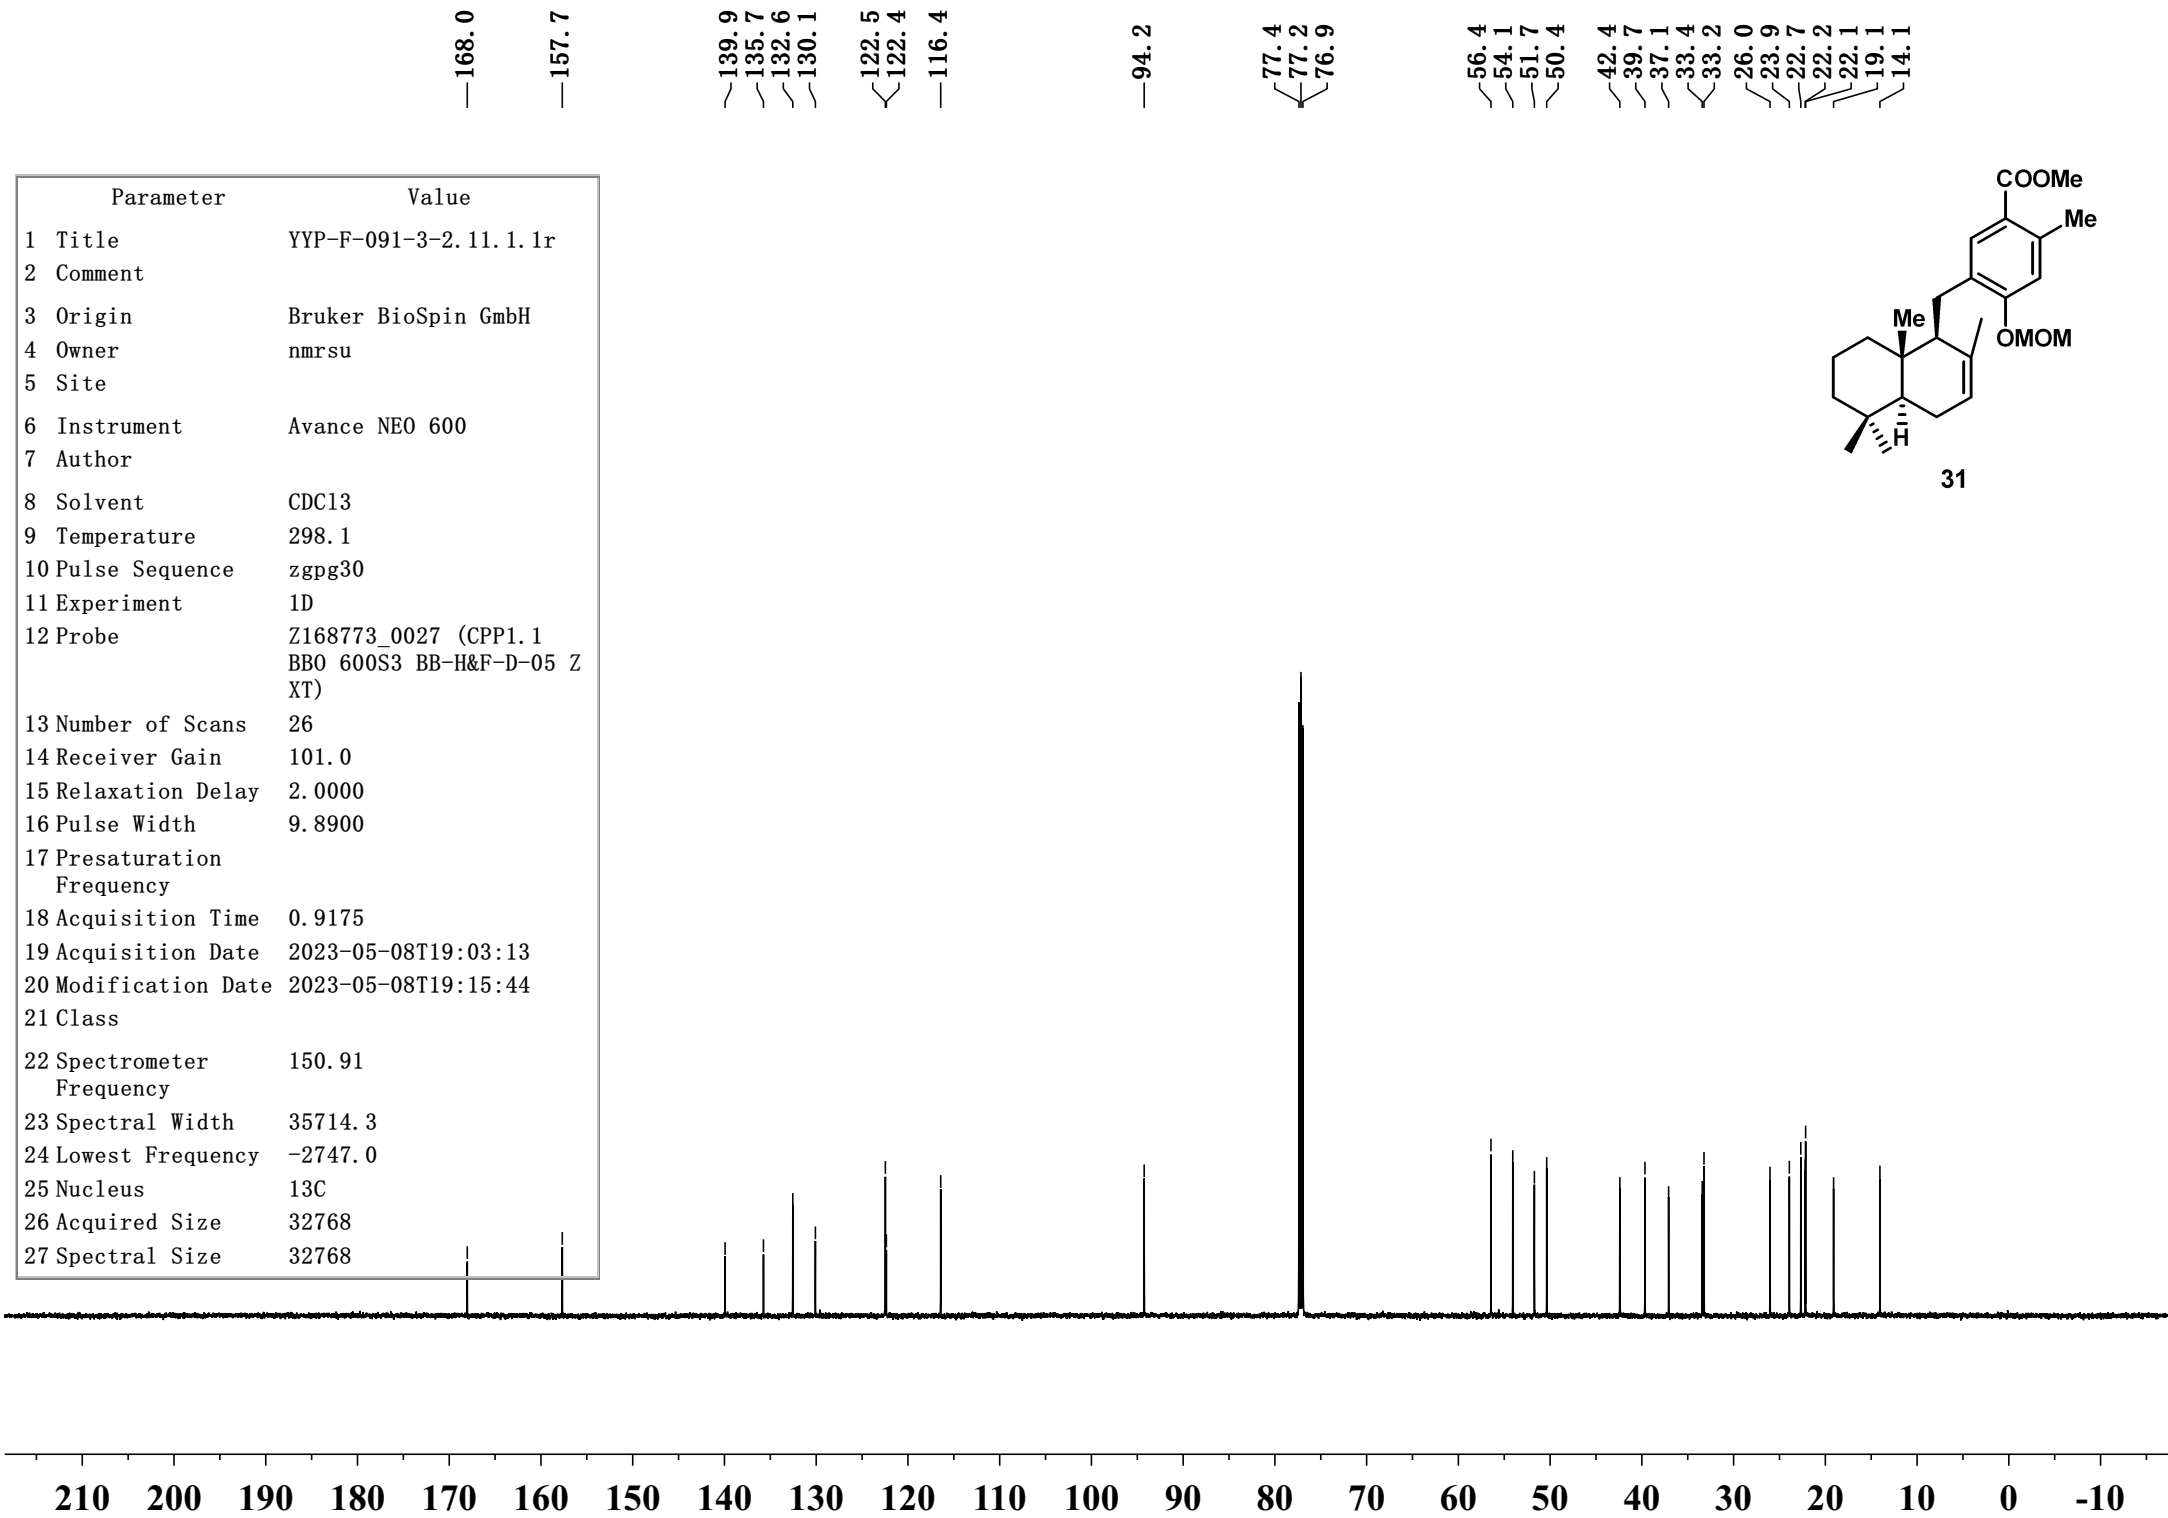

| Parameter                  | Value                                            |
|----------------------------|--------------------------------------------------|
| 1 Title                    | YYP-F-107-3-1.22.1.1r                            |
| 2 Comment                  |                                                  |
| 3 Origin                   | Bruker BioSpin GmbH                              |
| 4 Owner                    | nmsru                                            |
| 5 Site                     |                                                  |
| 6 Instrument               | Avance Neo 400M                                  |
| 7 Author                   |                                                  |
| 8 Solvent                  | CDC13                                            |
| 9 Temperature              | 296.1                                            |
| 10 Pulse Sequence          | zg30                                             |
| 11 Experiment              | 1D                                               |
| 12 Probe                   | Z163739_0254 (PI HR-BBO400S1-BBF/ H/ D-5.0-Z SP) |
| 13 Number of Scans         | 3                                                |
| 14 Receiver Gain           | 32.0                                             |
| 15 Relaxation Delay        | 1.0000                                           |
| 16 Pulse Width             | 8.0000                                           |
| 17 Presaturation Frequency |                                                  |
| 18 Acquisition Time        | 3.9977                                           |
| 19 Acquisition Date        | 2023-07-26T09:18:32                              |
| 20 Modification Date       | 2023-07-26T09:33:19                              |
| 21 Class                   |                                                  |
| 22 Spectrometer Frequency  | 400.18                                           |
| 23 Spectral Width          | 8196.7                                           |
| 24 Lowest Frequency        | -1637.0                                          |
| 25 Nucleus                 | 1H                                               |
| 26 Acquired Size           | 32768                                            |
| 27 Spectral Size           | 65536                                            |

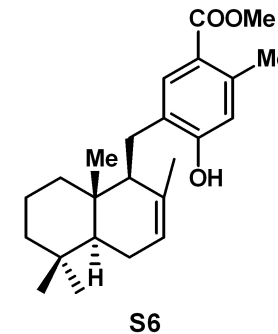

7.87  
7.26  
6.62  
5.39  
5.39  
5.38  
5.38  
5.37  
5.37  
3.88  
2.62  
2.62  
2.60  
2.50  
2.42  
2.40  
2.03  
2.01  
2.00  
1.99  
1.98  
1.98  
1.97  
1.96  
1.96  
1.95  
1.92  
1.91  
1.90  
1.89  
1.88  
1.88  
1.57  
1.57  
1.56  
1.54  
1.53  
1.52  
1.51  
1.50  
1.49  
1.46  
1.46  
1.45  
1.44  
1.44  
1.43  
1.42  
1.41  
1.40  
1.40  
1.40  
1.32  
1.31  
1.29  
1.28  
1.23  
1.22  
1.20  
1.19  
1.12  
1.11  
1.09  
1.08  
0.90  
0.88  
0.88

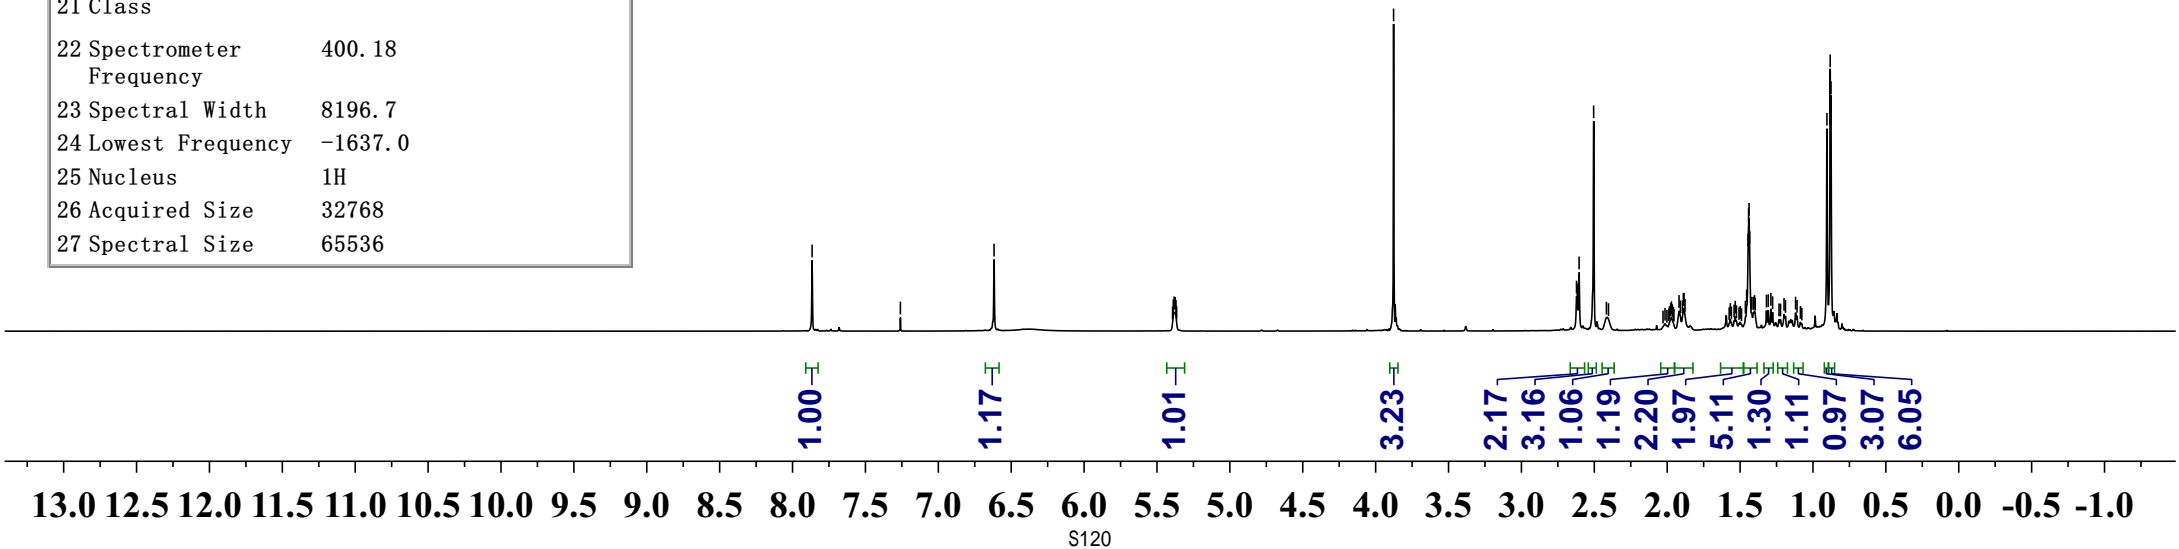

| Parameter                  | Value                                            |
|----------------------------|--------------------------------------------------|
| 1 Title                    | YYP-F-107-3-1.23.1.1r                            |
| 2 Comment                  |                                                  |
| 3 Origin                   | Bruker BioSpin GmbH                              |
| 4 Owner                    | nmrsu                                            |
| 5 Site                     |                                                  |
| 6 Instrument               | Avance Neo 400M                                  |
| 7 Author                   |                                                  |
| 8 Solvent                  | CDC13                                            |
| 9 Temperature              | 296.5                                            |
| 10 Pulse Sequence          | zgpg30                                           |
| 11 Experiment              | 1D                                               |
| 12 Probe                   | Z163739_0254 (PI HR-BB0400S1-BBF/ H/ D-5.0-Z SP) |
| 13 Number of Scans         | 37                                               |
| 14 Receiver Gain           | 39.0                                             |
| 15 Relaxation Delay        | 2.0000                                           |
| 16 Pulse Width             | 7.8100                                           |
| 17 Presaturation Frequency |                                                  |
| 18 Acquisition Time        | 1.3763                                           |
| 19 Acquisition Date        | 2023-07-26T09:22:08                              |
| 20 Modification Date       | 2023-07-26T09:33:19                              |
| 21 Class                   |                                                  |
| 22 Spectrometer Frequency  | 100.63                                           |
| 23 Spectral Width          | 23809.5                                          |
| 24 Lowest Frequency        | -1842.2                                          |
| 25 Nucleus                 | <sup>13</sup> C                                  |
| 26 Acquired Size           | 32768                                            |
| 27 Spectral Size           | 32768                                            |

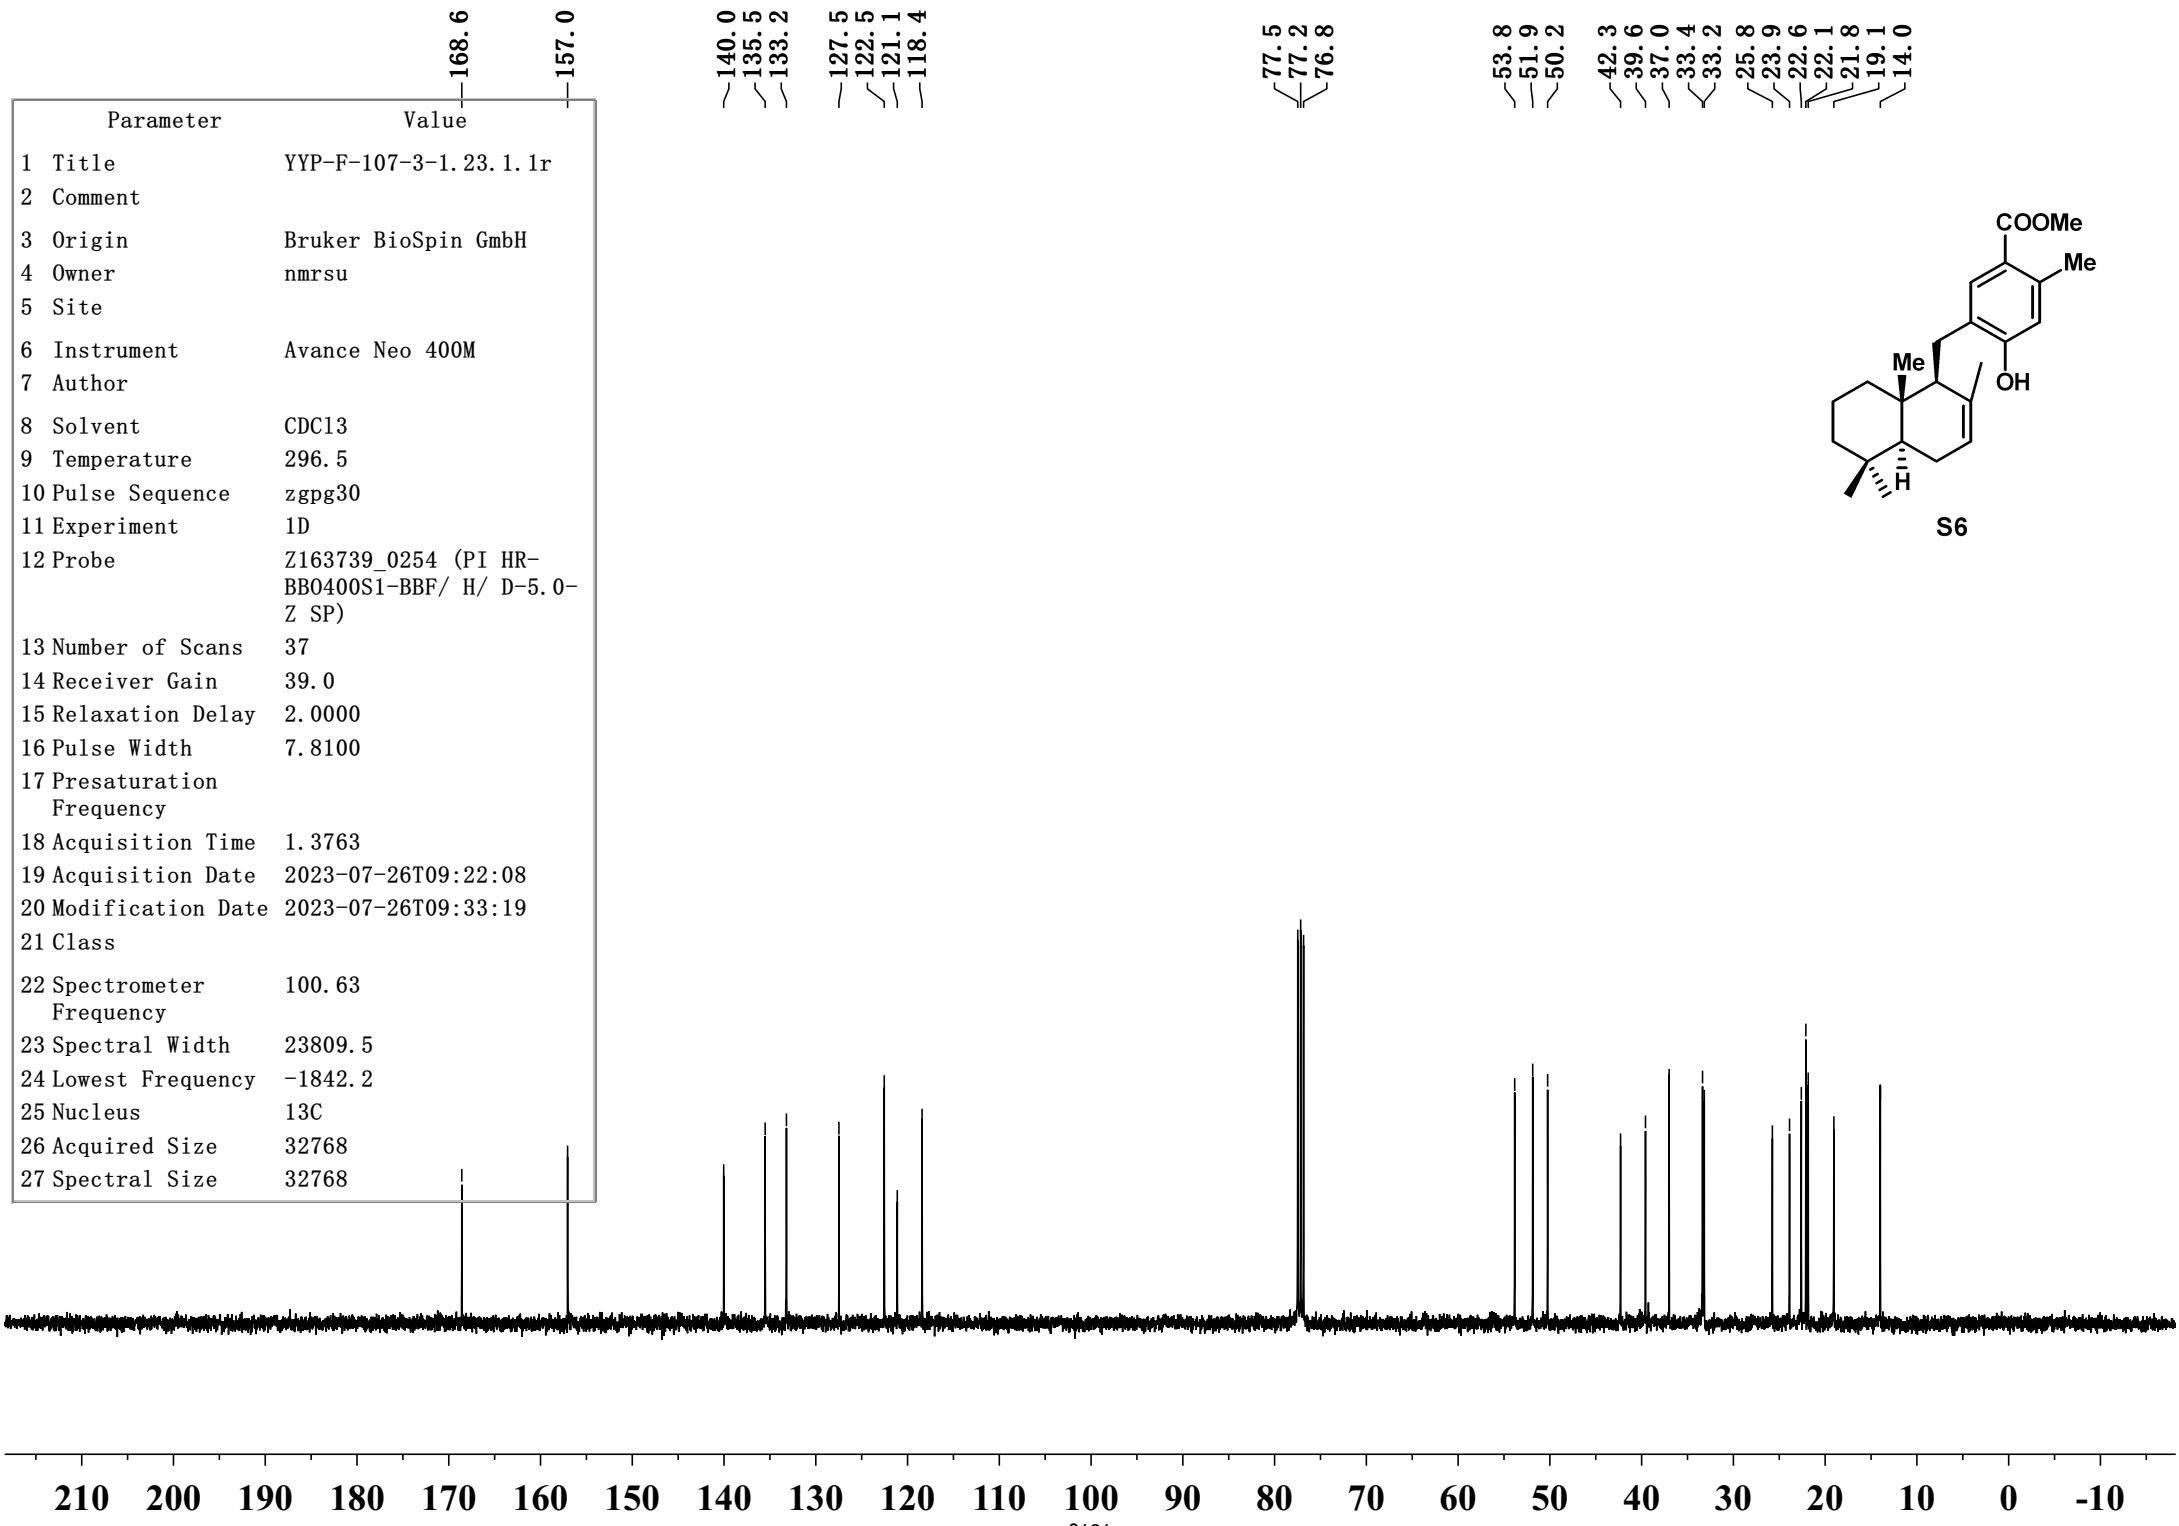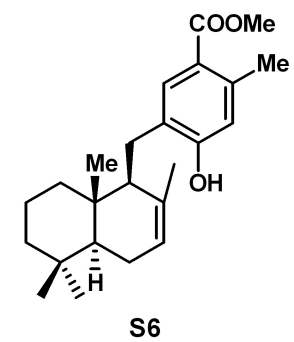

| Parameter                     | Value                                             |
|-------------------------------|---------------------------------------------------|
| 1 Title                       | YYP-F-108-1-1.1.1.1r                              |
| 2 Comment                     |                                                   |
| 3 Origin                      | Bruker BioSpin GmbH                               |
| 4 Owner                       | nmr-su                                            |
| 5 Site                        |                                                   |
| 6 Instrument                  | AVANCE NEO 400 MHZ<br>DIGITAL NMR<br>SPECTROMETER |
| 7 Author                      |                                                   |
| 8 Solvent                     | CDC13                                             |
| 9 Temperature                 | 295.5                                             |
| 10 Pulse Sequence             | zg30                                              |
| 11 Experiment                 | 1D                                                |
| 12 Probe                      | Z116098_0723 (PA BBO<br>400S1 BBF-H-D-05 Z SP)    |
| 13 Number of Scans            | 5                                                 |
| 14 Receiver Gain              | 101.0                                             |
| 15 Relaxation Delay           | 1.0000                                            |
| 16 Pulse Width                | 8.5800                                            |
| 17 Presaturation<br>Frequency |                                                   |
| 18 Acquisition Time           | 3.9977                                            |
| 19 Acquisition Date           | 2023-05-11T21:55:38                               |
| 20 Modification Date          | 2023-05-11T22:09:32                               |
| 21 Class                      |                                                   |
| 22 Spectrometer<br>Frequency  | 400.13                                            |
| 23 Spectral Width             | 8196.7                                            |
| 24 Lowest Frequency           | -1637.1                                           |
| 25 Nucleus                    | <sup>1</sup> H                                    |
| 26 Acquired Size              | 32768                                             |
| 27 Spectral Size              | 65536                                             |

7.73  
7.26  
6.60  
3.84  
2.62  
2.61  
2.57  
2.51  
2.09  
2.06  
2.05  
2.05  
1.75  
1.74  
1.71  
1.70  
1.68  
1.67  
1.65  
1.63  
1.62  
1.61  
1.58  
1.49  
1.48  
1.44  
1.43  
1.40  
1.38  
1.37  
1.34  
1.34  
1.34  
1.26  
1.25  
1.19  
1.17  
1.16  
1.04  
1.03  
1.01  
1.00  
0.97  
0.95  
0.94  
0.90  
0.89  
0.84

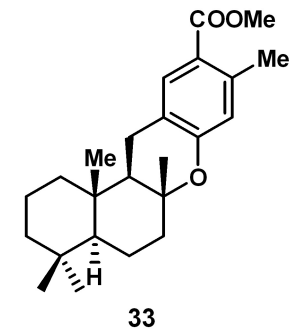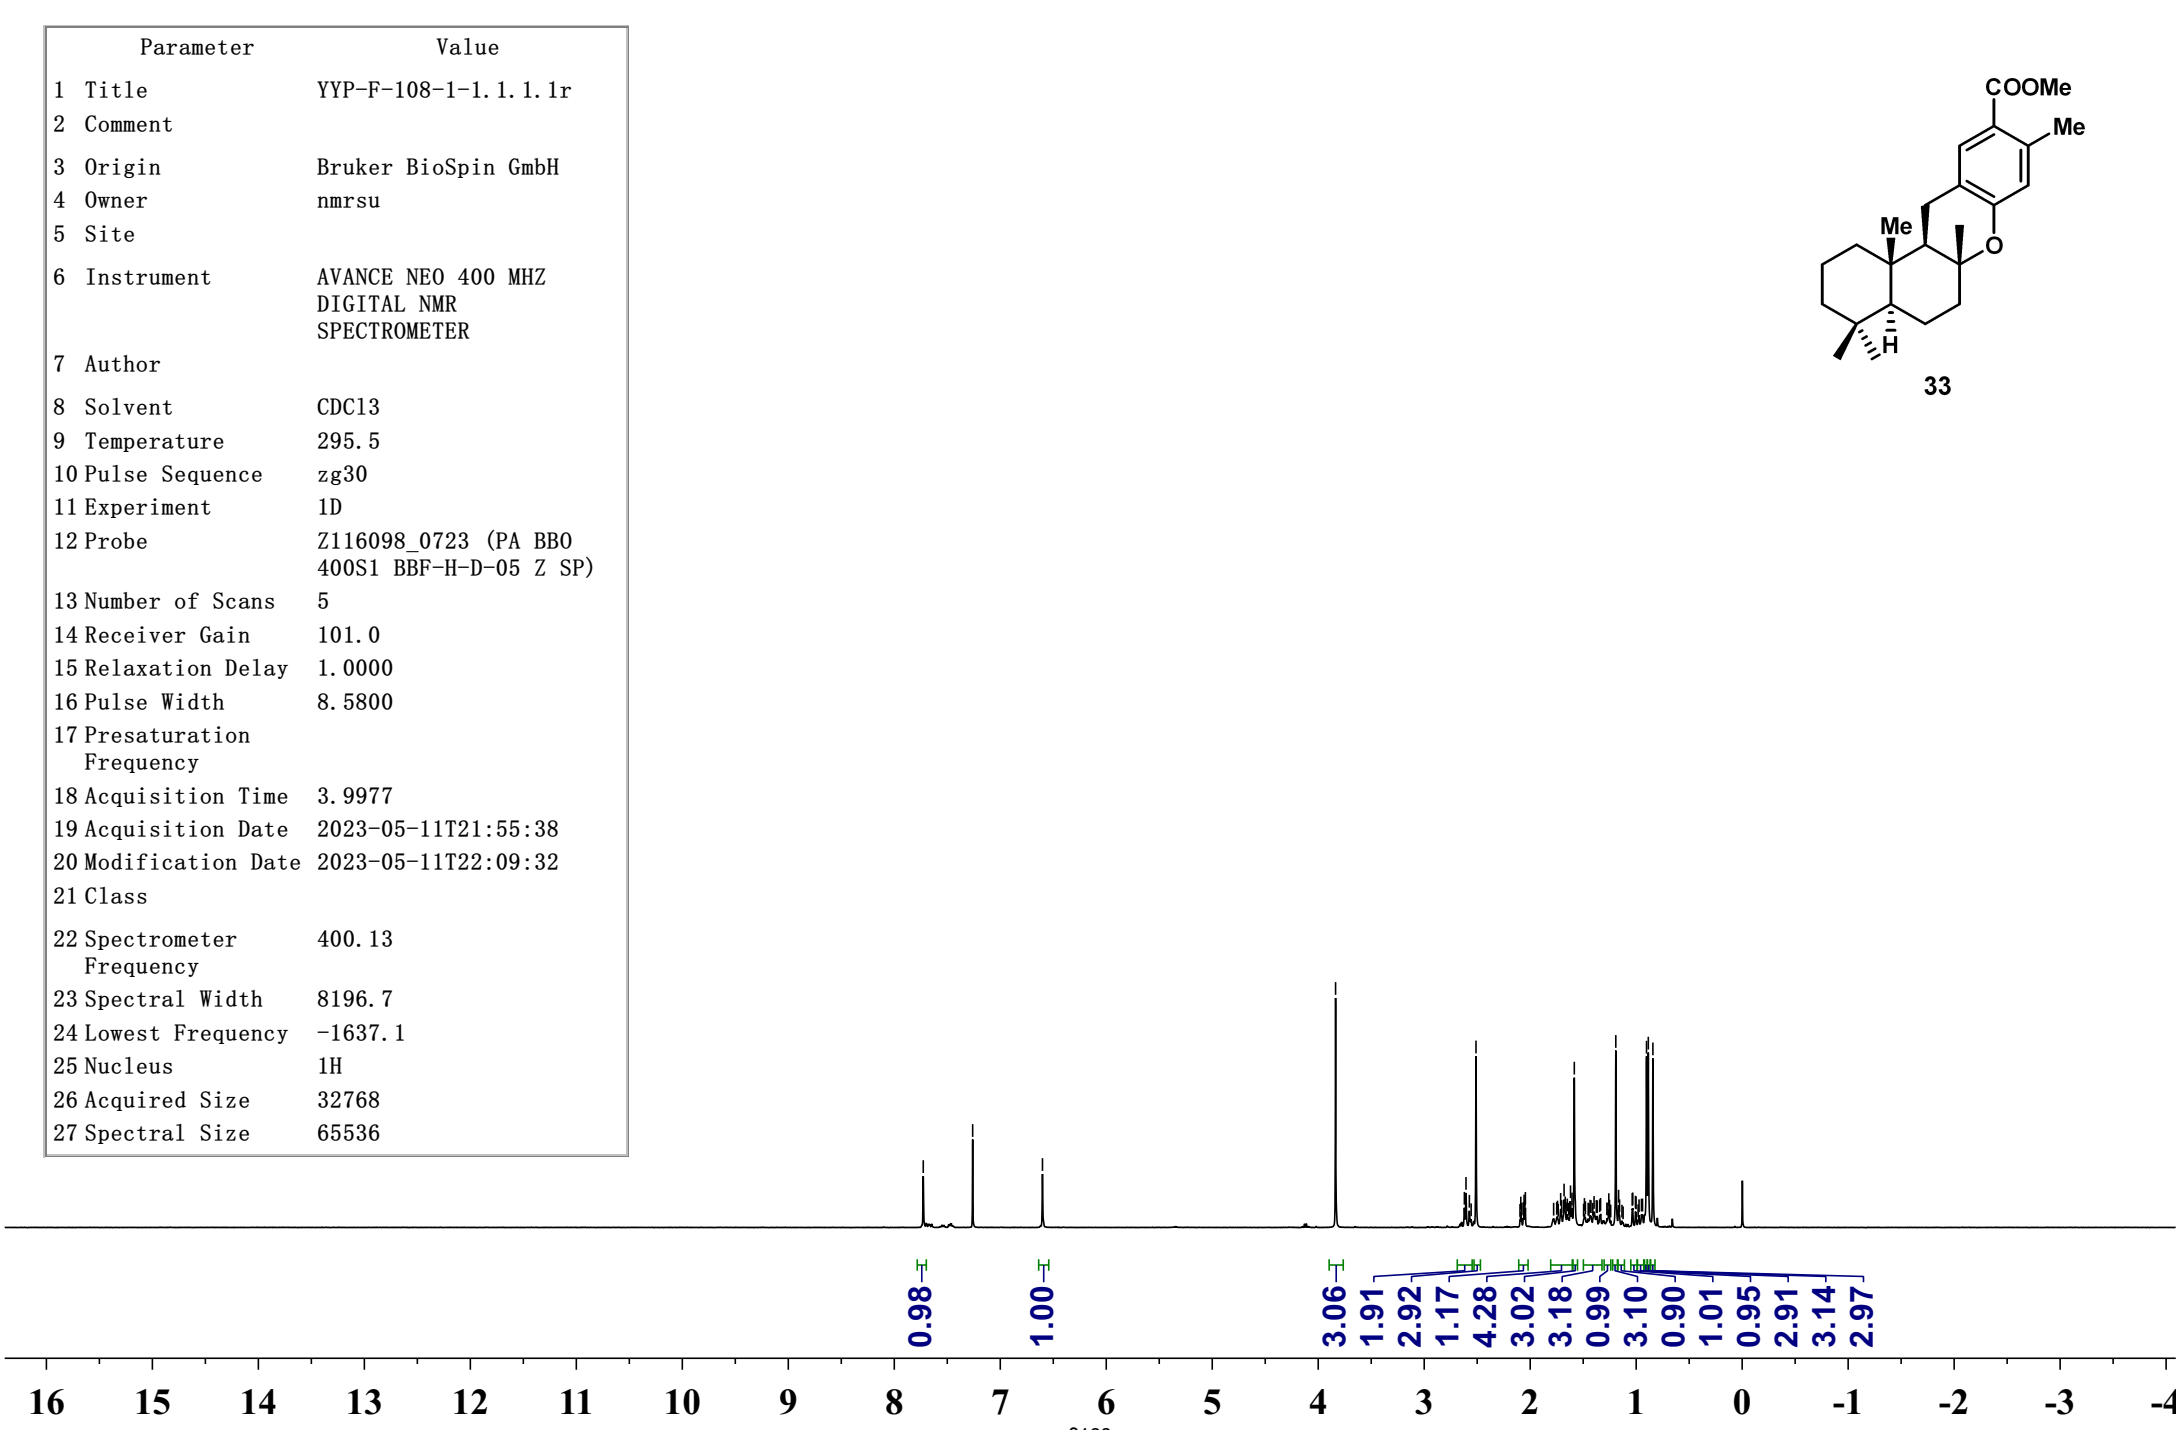

| Parameter                     | Value                                                  |
|-------------------------------|--------------------------------------------------------|
| 1 Title                       | YYP-F-108-1-1.10.1.1r                                  |
| 2 Comment                     |                                                        |
| 3 Origin                      | Bruker BioSpin GmbH                                    |
| 4 Owner                       | nmrsu                                                  |
| 5 Site                        |                                                        |
| 6 Instrument                  | Avance NEO 600                                         |
| 7 Author                      |                                                        |
| 8 Solvent                     | CDC13                                                  |
| 9 Temperature                 | 298.1                                                  |
| 10 Pulse Sequence             | zgpg30                                                 |
| 11 Experiment                 | 1D                                                     |
| 12 Probe                      | Z168773_0027 (CPP1.1<br>BBO 600S3 BB-H&F-D-05 Z<br>XT) |
| 13 Number of Scans            | 64                                                     |
| 14 Receiver Gain              | 101.0                                                  |
| 15 Relaxation Delay           | 2.0000                                                 |
| 16 Pulse Width                | 9.8900                                                 |
| 17 Presaturation<br>Frequency |                                                        |
| 18 Acquisition Time           | 0.9175                                                 |
| 19 Acquisition Date           | 2023-05-12T10:51:09                                    |
| 20 Modification Date          | 2023-05-12T13:20:25                                    |
| 21 Class                      |                                                        |
| 22 Spectrometer<br>Frequency  | 150.91                                                 |
| 23 Spectral Width             | 35714.3                                                |
| 24 Lowest Frequency           | -2746.0                                                |
| 25 Nucleus                    | 13C                                                    |
| 26 Acquired Size              | 32768                                                  |
| 27 Spectral Size              | 32768                                                  |

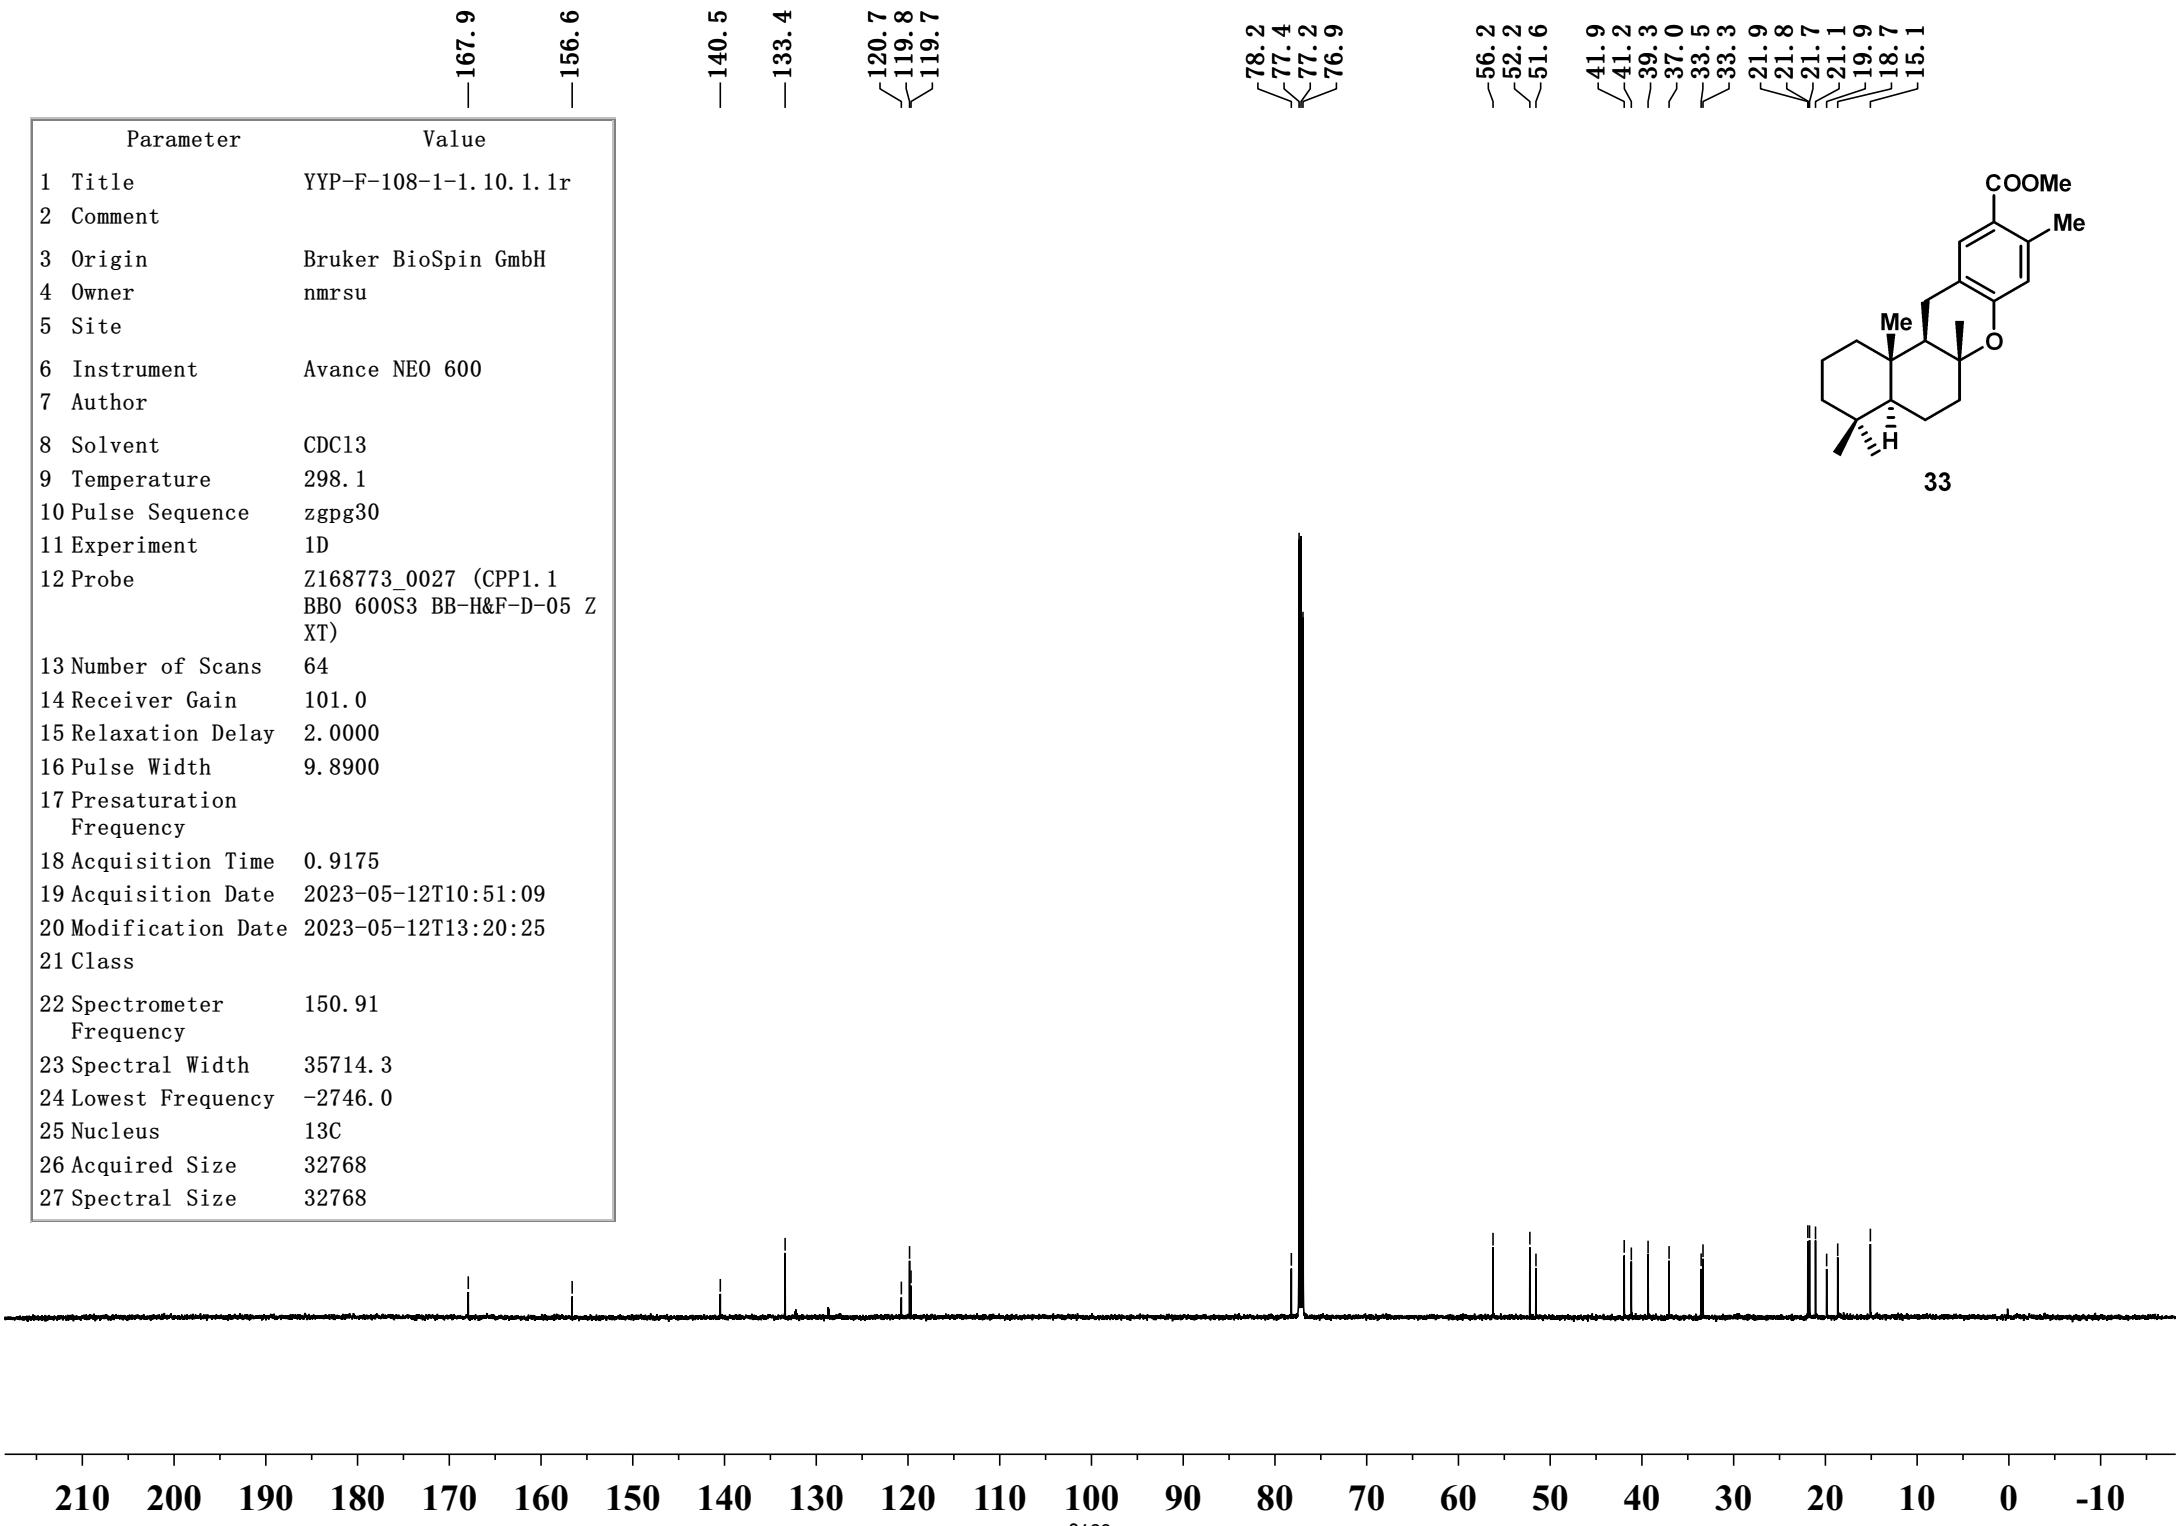

7.85  
7.26  
6.62  
6.67  
2.66  
2.64  
2.63  
2.61  
2.59  
2.59  
2.56  
2.55  
2.10  
2.09  
2.09  
2.08  
2.07  
2.07  
1.79  
1.78  
1.77  
1.77  
1.76  
1.76  
1.75  
1.72  
1.71  
1.70  
1.69  
1.68  
1.67  
1.63  
1.62  
1.61  
1.60  
1.59  
1.59  
1.50  
1.49  
1.49  
1.47  
1.47  
1.46  
1.46  
1.43  
1.42  
1.41  
1.41  
1.40  
1.40  
1.38  
1.37  
1.36  
1.35  
1.33  
1.33  
1.33  
1.21  
1.17  
1.17  
1.15  
1.15  
1.14  
1.04  
1.04  
1.02  
1.02  
0.98  
0.98  
0.96  
0.95  
0.94  
0.91  
0.90  
0.85

| Parameter                     | Value                                          |
|-------------------------------|------------------------------------------------|
| 1 Title                       | YYP-G-100-1-1.10.1.1r                          |
| 2 Comment                     |                                                |
| 3 Origin                      | Bruker BioSpin GmbH                            |
| 4 Owner                       | nmrsu                                          |
| 5 Site                        |                                                |
| 6 Instrument                  | Avance NEO 600                                 |
| 7 Author                      |                                                |
| 8 Solvent                     | CDC13                                          |
| 9 Temperature                 | 298.2                                          |
| 10 Pulse Sequence             | zg30                                           |
| 11 Experiment                 | 1D                                             |
| 12 Probe                      | Z114607_0339 (PA BBO<br>600S3 BBF-H-D-05 Z SP) |
| 13 Number of Scans            | 3                                              |
| 14 Receiver Gain              | 101.0                                          |
| 15 Relaxation Delay           | 1.0000                                         |
| 16 Pulse Width                | 10.0000                                        |
| 17 Presaturation<br>Frequency |                                                |
| 18 Acquisition Time           | 2.7525                                         |
| 19 Acquisition Date           | 2023-10-17T19:07:47                            |
| 20 Modification Date          | 2023-10-17T19:13:43                            |
| 21 Class                      |                                                |
| 22 Spectrometer<br>Frequency  | 600.15                                         |
| 23 Spectral Width             | 11904.8                                        |
| 24 Lowest Frequency           | -2260.9                                        |
| 25 Nucleus                    | 1H                                             |
| 26 Acquired Size              | 32768                                          |
| 27 Spectral Size              | 65536                                          |

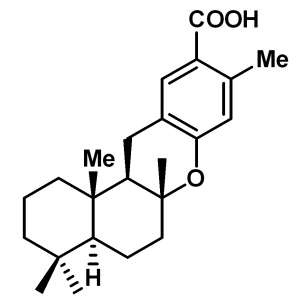

35

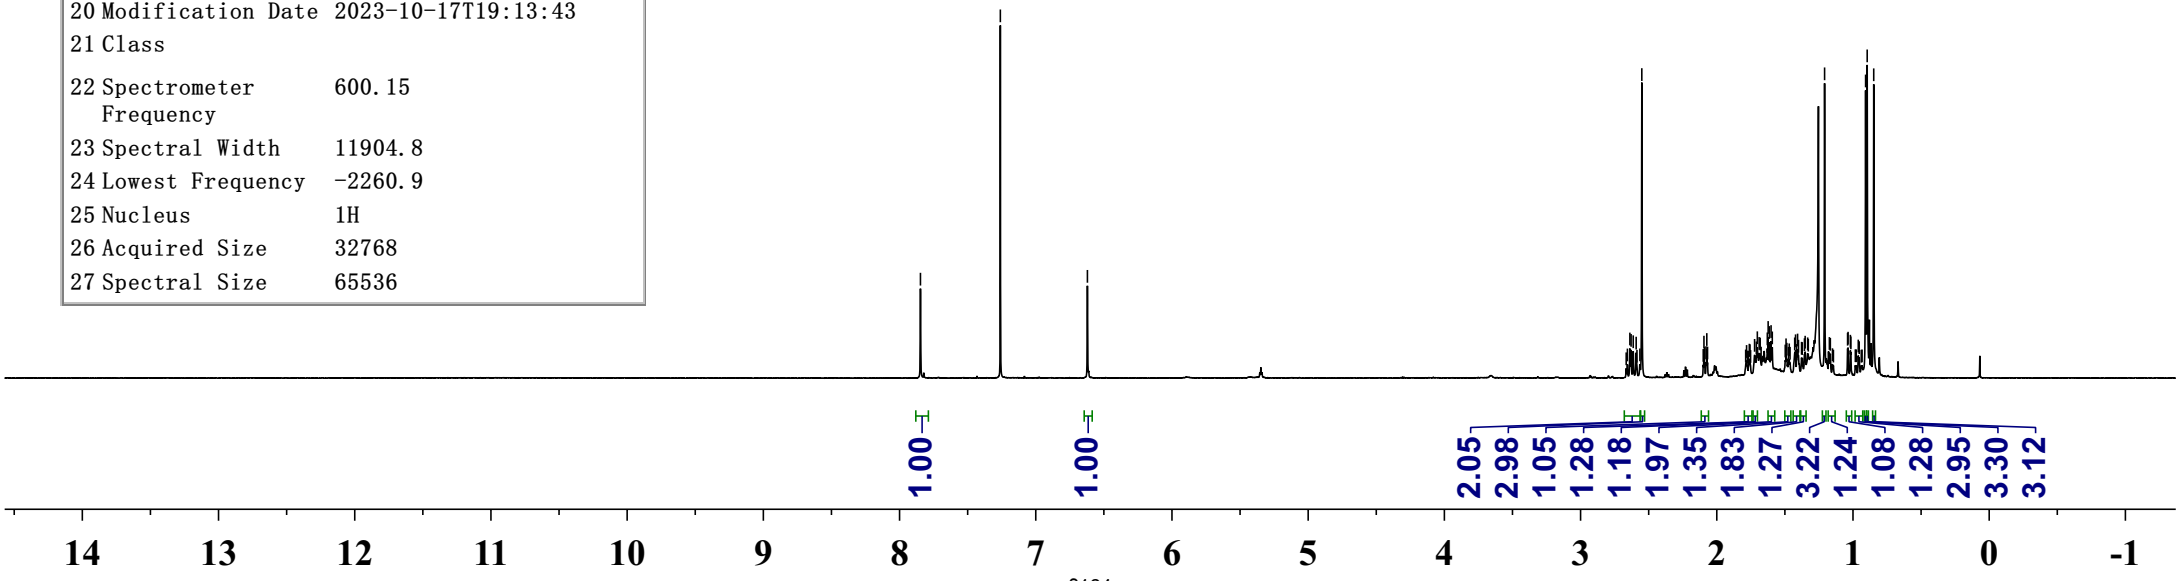



| Parameter                     | Value                                                  |
|-------------------------------|--------------------------------------------------------|
| 1 Title                       | YYP-F-127-1-1.11.1.1r                                  |
| 2 Comment                     |                                                        |
| 3 Origin                      | Bruker BioSpin GmbH                                    |
| 4 Owner                       | nmrsu                                                  |
| 5 Site                        |                                                        |
| 6 Instrument                  | Avance NEO 600                                         |
| 7 Author                      |                                                        |
| 8 Solvent                     | CDC13                                                  |
| 9 Temperature                 | 298.1                                                  |
| 10 Pulse Sequence             | zgpg30                                                 |
| 11 Experiment                 | 1D                                                     |
| 12 Probe                      | Z168773_0027 (CPP1.1<br>BBO 600S3 BB-H&F-D-05 Z<br>XT) |
| 13 Number of Scans            | 44                                                     |
| 14 Receiver Gain              | 101.0                                                  |
| 15 Relaxation Delay           | 2.0000                                                 |
| 16 Pulse Width                | 9.8900                                                 |
| 17 Presaturation<br>Frequency |                                                        |
| 18 Acquisition Time           | 0.9175                                                 |
| 19 Acquisition Date           | 2023-05-25T10:40:11                                    |
| 20 Modification Date          | 2023-05-25T10:55:33                                    |
| 21 Class                      |                                                        |
| 22 Spectrometer<br>Frequency  | 150.91                                                 |
| 23 Spectral Width             | 35714.3                                                |
| 24 Lowest Frequency           | -2747.0                                                |
| 25 Nucleus                    | <sup>13</sup> C                                        |
| 26 Acquired Size              | 32768                                                  |
| 27 Spectral Size              | 32768                                                  |

—172.9      —157.5      —141.6      —134.5      —120.0  
                  —119.9      —119.5      —78.4      —77.4      —77.2      —77.0  
                  —56.2      —52.2      —41.9      —41.1      —39.3      —37.1      —33.5      —33.3      —22.3      —21.8      —21.7      —21.1      —19.9      —18.6      —15.1

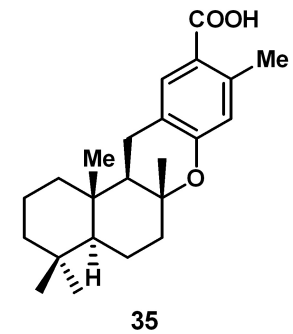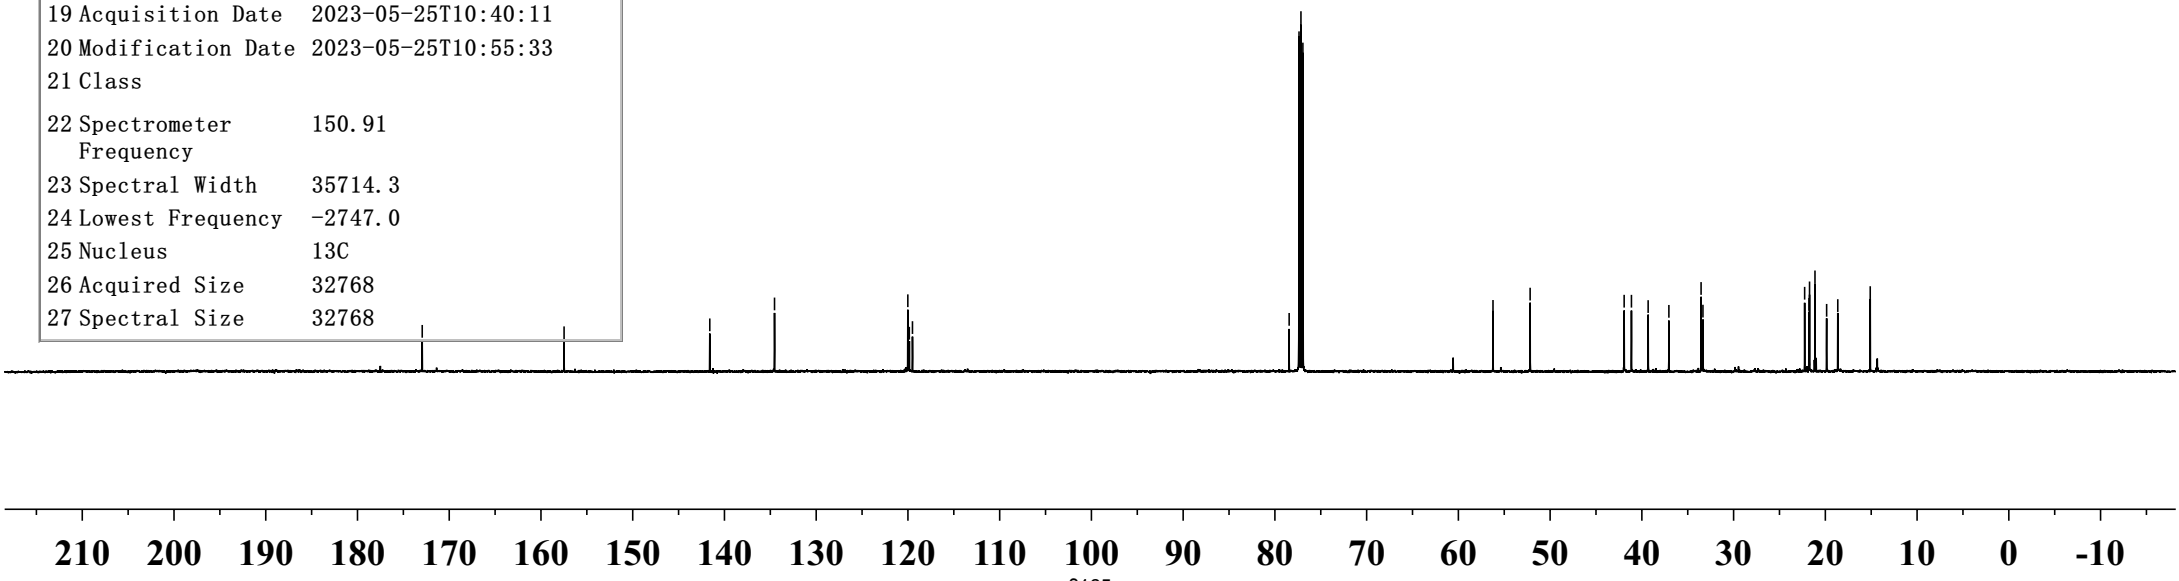

11.83  
7.26  
6.21  
2.70  
2.69  
2.67  
2.67  
2.52  
2.31  
2.29  
2.28  
2.26  
2.09  
2.08  
2.07  
2.06  
1.82  
1.80  
1.78  
1.78  
1.76  
1.76  
1.76  
1.76  
1.70  
1.69  
1.68  
1.67  
1.66  
1.65  
1.64  
1.63  
1.56  
1.55  
1.54  
1.53  
1.50  
1.49  
1.49  
1.48  
1.47  
1.47  
1.46  
1.43  
1.42  
1.41  
1.41  
1.40  
1.38  
1.38  
1.37  
1.36  
1.36  
1.20  
1.18  
1.17  
1.17  
1.15  
1.15  
1.04  
1.04  
1.02  
1.02  
0.99  
0.99  
0.98  
0.97  
0.96  
0.92  
0.91  
0.85

| Parameter                     | Value                                          |
|-------------------------------|------------------------------------------------|
| 1 Title                       | YYP-G-103-2-2.10.1.1r                          |
| 2 Comment                     |                                                |
| 3 Origin                      | Bruker BioSpin GmbH                            |
| 4 Owner                       | nmrsu                                          |
| 5 Site                        |                                                |
| 6 Instrument                  | Avance NEO 600                                 |
| 7 Author                      |                                                |
| 8 Solvent                     | CDC13                                          |
| 9 Temperature                 | 298.2                                          |
| 10 Pulse Sequence             | zg30                                           |
| 11 Experiment                 | 1D                                             |
| 12 Probe                      | Z114607_0339 (PA BBO<br>600S3 BBF-H-D-05 Z SP) |
| 13 Number of Scans            | 8                                              |
| 14 Receiver Gain              | 101.0                                          |
| 15 Relaxation Delay           | 1.0000                                         |
| 16 Pulse Width                | 10.0000                                        |
| 17 Presaturation<br>Frequency |                                                |
| 18 Acquisition Time           | 2.7525                                         |
| 19 Acquisition Date           | 2023-10-31T19:04:29                            |
| 20 Modification Date          | 2023-10-31T19:31:50                            |
| 21 Class                      |                                                |
| 22 Spectrometer<br>Frequency  | 600.15                                         |
| 23 Spectral Width             | 11904.8                                        |
| 24 Lowest Frequency           | -2261.0                                        |
| 25 Nucleus                    | 1H                                             |
| 26 Acquired Size              | 32768                                          |
| 27 Spectral Size              | 65536                                          |

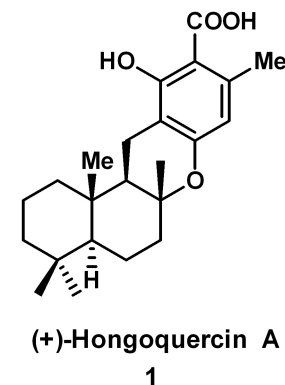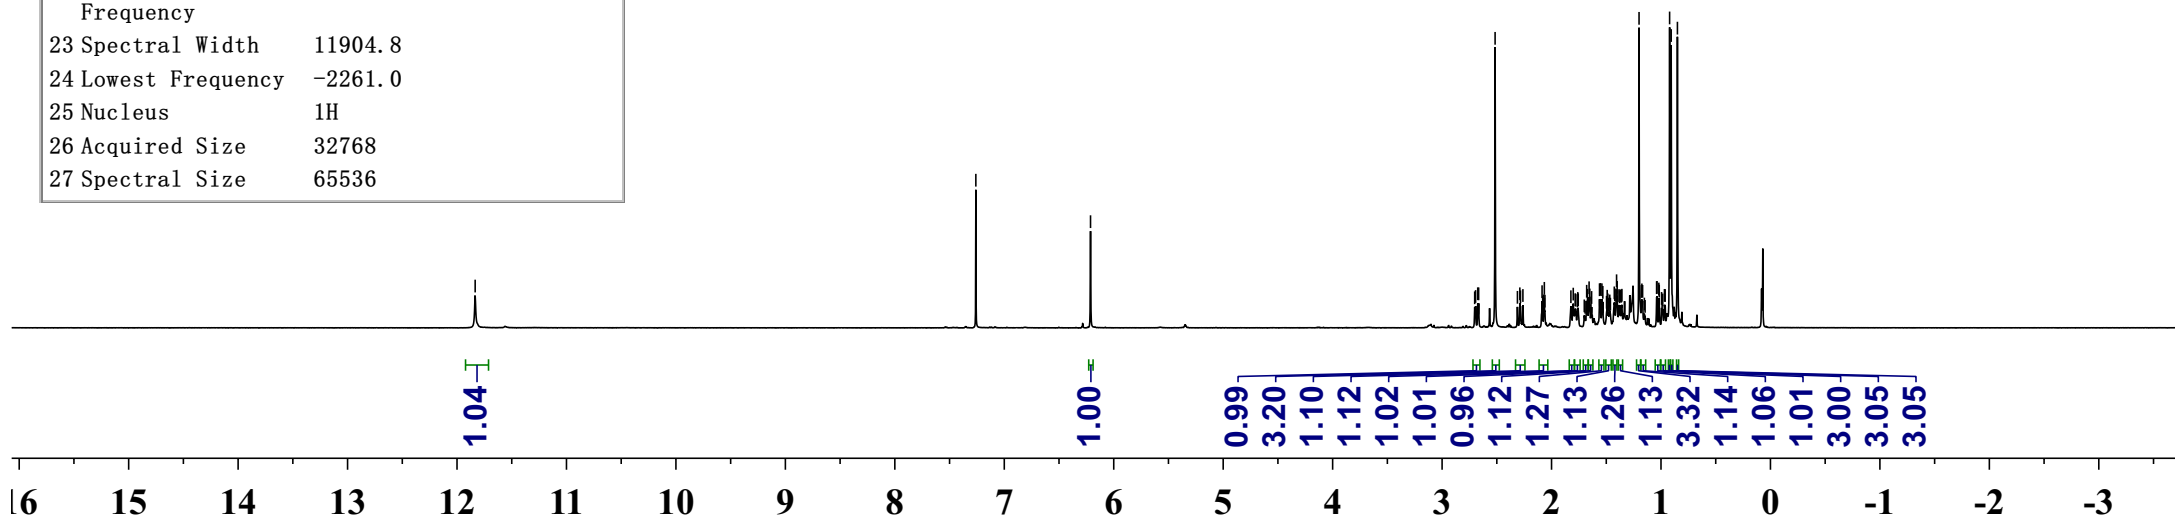

| Parameter                     | Value                                          |
|-------------------------------|------------------------------------------------|
| 1 Title                       | YYP-G-103-2-2.11.1.1r                          |
| 2 Comment                     |                                                |
| 3 Origin                      | Bruker BioSpin GmbH                            |
| 4 Owner                       | nmrsu                                          |
| 5 Site                        |                                                |
| 6 Instrument                  | Avance NEO 600                                 |
| 7 Author                      |                                                |
| 8 Solvent                     | CDC13                                          |
| 9 Temperature                 | 298.2                                          |
| 10 Pulse Sequence             | zgpg30                                         |
| 11 Experiment                 | 1D                                             |
| 12 Probe                      | Z114607_0339 (PA BBO<br>600S3 BBF-H-D-05 Z SP) |
| 13 Number of Scans            | 400                                            |
| 14 Receiver Gain              | 101.0                                          |
| 15 Relaxation Delay           | 2.0000                                         |
| 16 Pulse Width                | 11.5000                                        |
| 17 Presaturation<br>Frequency |                                                |
| 18 Acquisition Time           | 0.9175                                         |
| 19 Acquisition Date           | 2023-10-31T19:25:27                            |
| 20 Modification Date          | 2023-10-31T19:31:50                            |
| 21 Class                      |                                                |
| 22 Spectrometer<br>Frequency  | 150.91                                         |
| 23 Spectral Width             | 35714.3                                        |
| 24 Lowest Frequency           | -2745.7                                        |
| 25 Nucleus                    | 13C                                            |
| 26 Acquired Size              | 32768                                          |
| 27 Spectral Size              | 32768                                          |

—176.1      —164.0      —159.0      —141.6  
 —112.8      —108.2      —102.7  
 —78.6      —77.4      —77.2      —76.9  
 —56.3      —51.7      —42.0      —41.0      —39.3      —37.1      —33.6      —33.4      —24.3      —21.7      —20.9      —19.9      —18.6      —16.8      —15.1

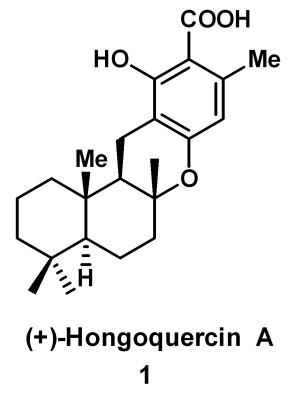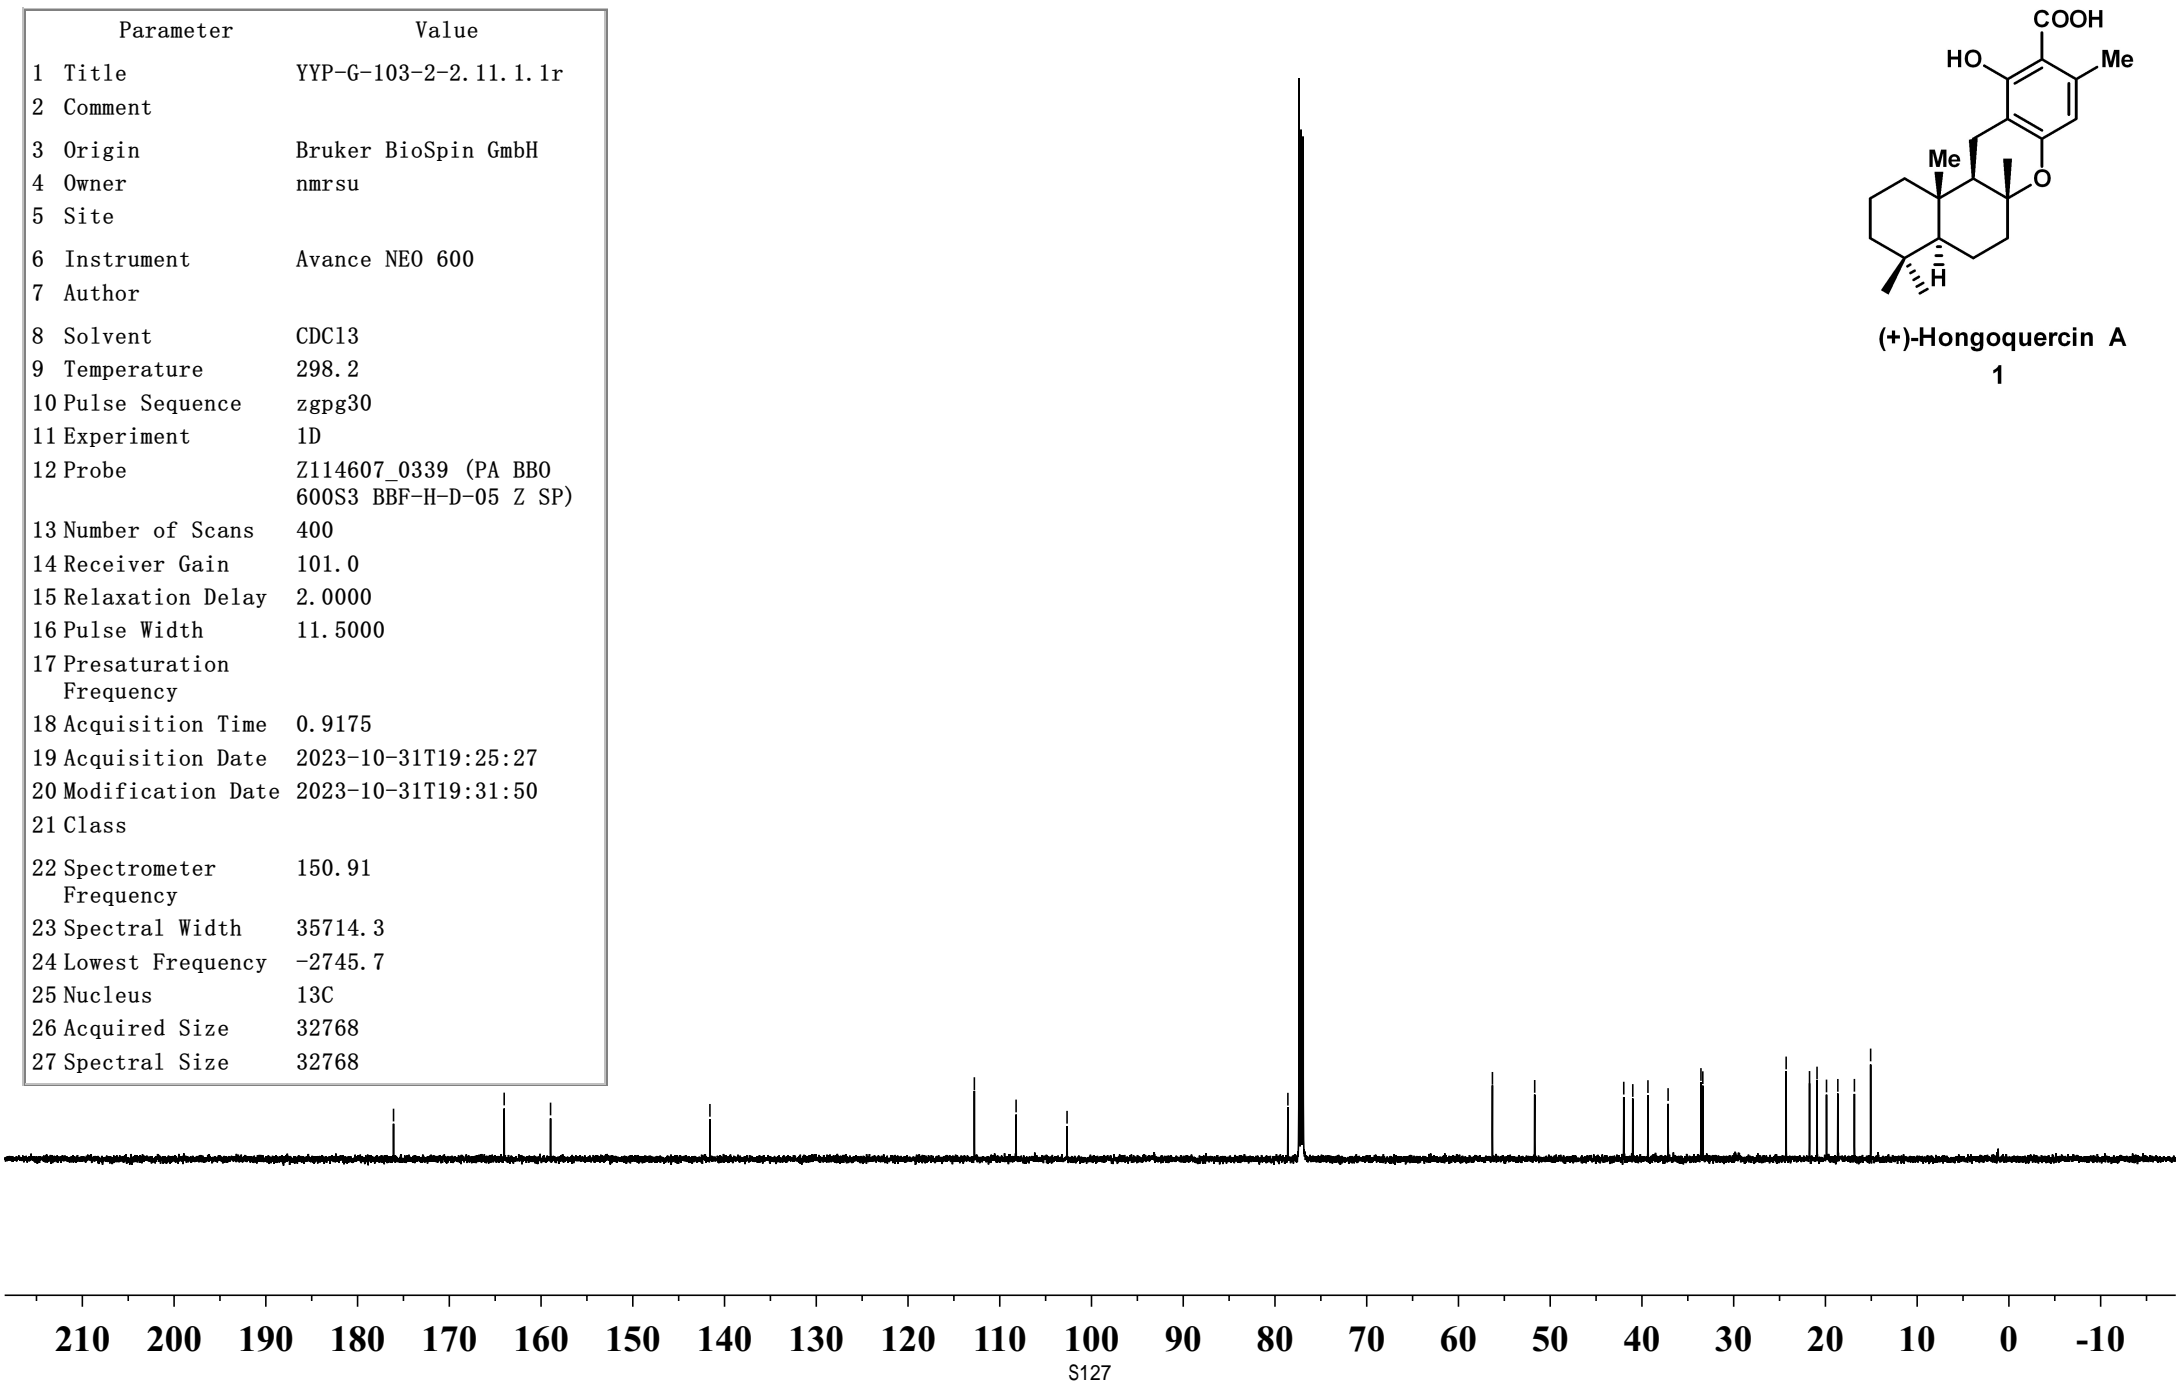

| Parameter                  | Value                                            |
|----------------------------|--------------------------------------------------|
| 1 Title                    | YYP-G-078-1-1.3.1.1r                             |
| 2 Comment                  |                                                  |
| 3 Origin                   | Bruker BioSpin GmbH                              |
| 4 Owner                    | nmrsu                                            |
| 5 Site                     |                                                  |
| 6 Instrument               | Avance Neo 400M                                  |
| 7 Author                   |                                                  |
| 8 Solvent                  | CDC13                                            |
| 9 Temperature              | 296.7                                            |
| 10 Pulse Sequence          | zg30                                             |
| 11 Experiment              | 1D                                               |
| 12 Probe                   | Z163739_0254 (PI HR-BBO400S1-BBF/ H/ D-5.0-Z SP) |
| 13 Number of Scans         | 4                                                |
| 14 Receiver Gain           | 48.4                                             |
| 15 Relaxation Delay        | 1.0000                                           |
| 16 Pulse Width             | 8.0000                                           |
| 17 Presaturation Frequency |                                                  |
| 18 Acquisition Time        | 3.9977                                           |
| 19 Acquisition Date        | 2023-09-19T17:10:57                              |
| 20 Modification Date       | 2023-09-19T17:25:43                              |
| 21 Class                   |                                                  |
| 22 Spectrometer Frequency  | 400.18                                           |
| 23 Spectral Width          | 8196.7                                           |
| 24 Lowest Frequency        | -1636.9                                          |
| 25 Nucleus                 | 1H                                               |
| 26 Acquired Size           | 32768                                            |
| 27 Spectral Size           | 65536                                            |

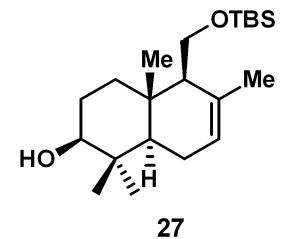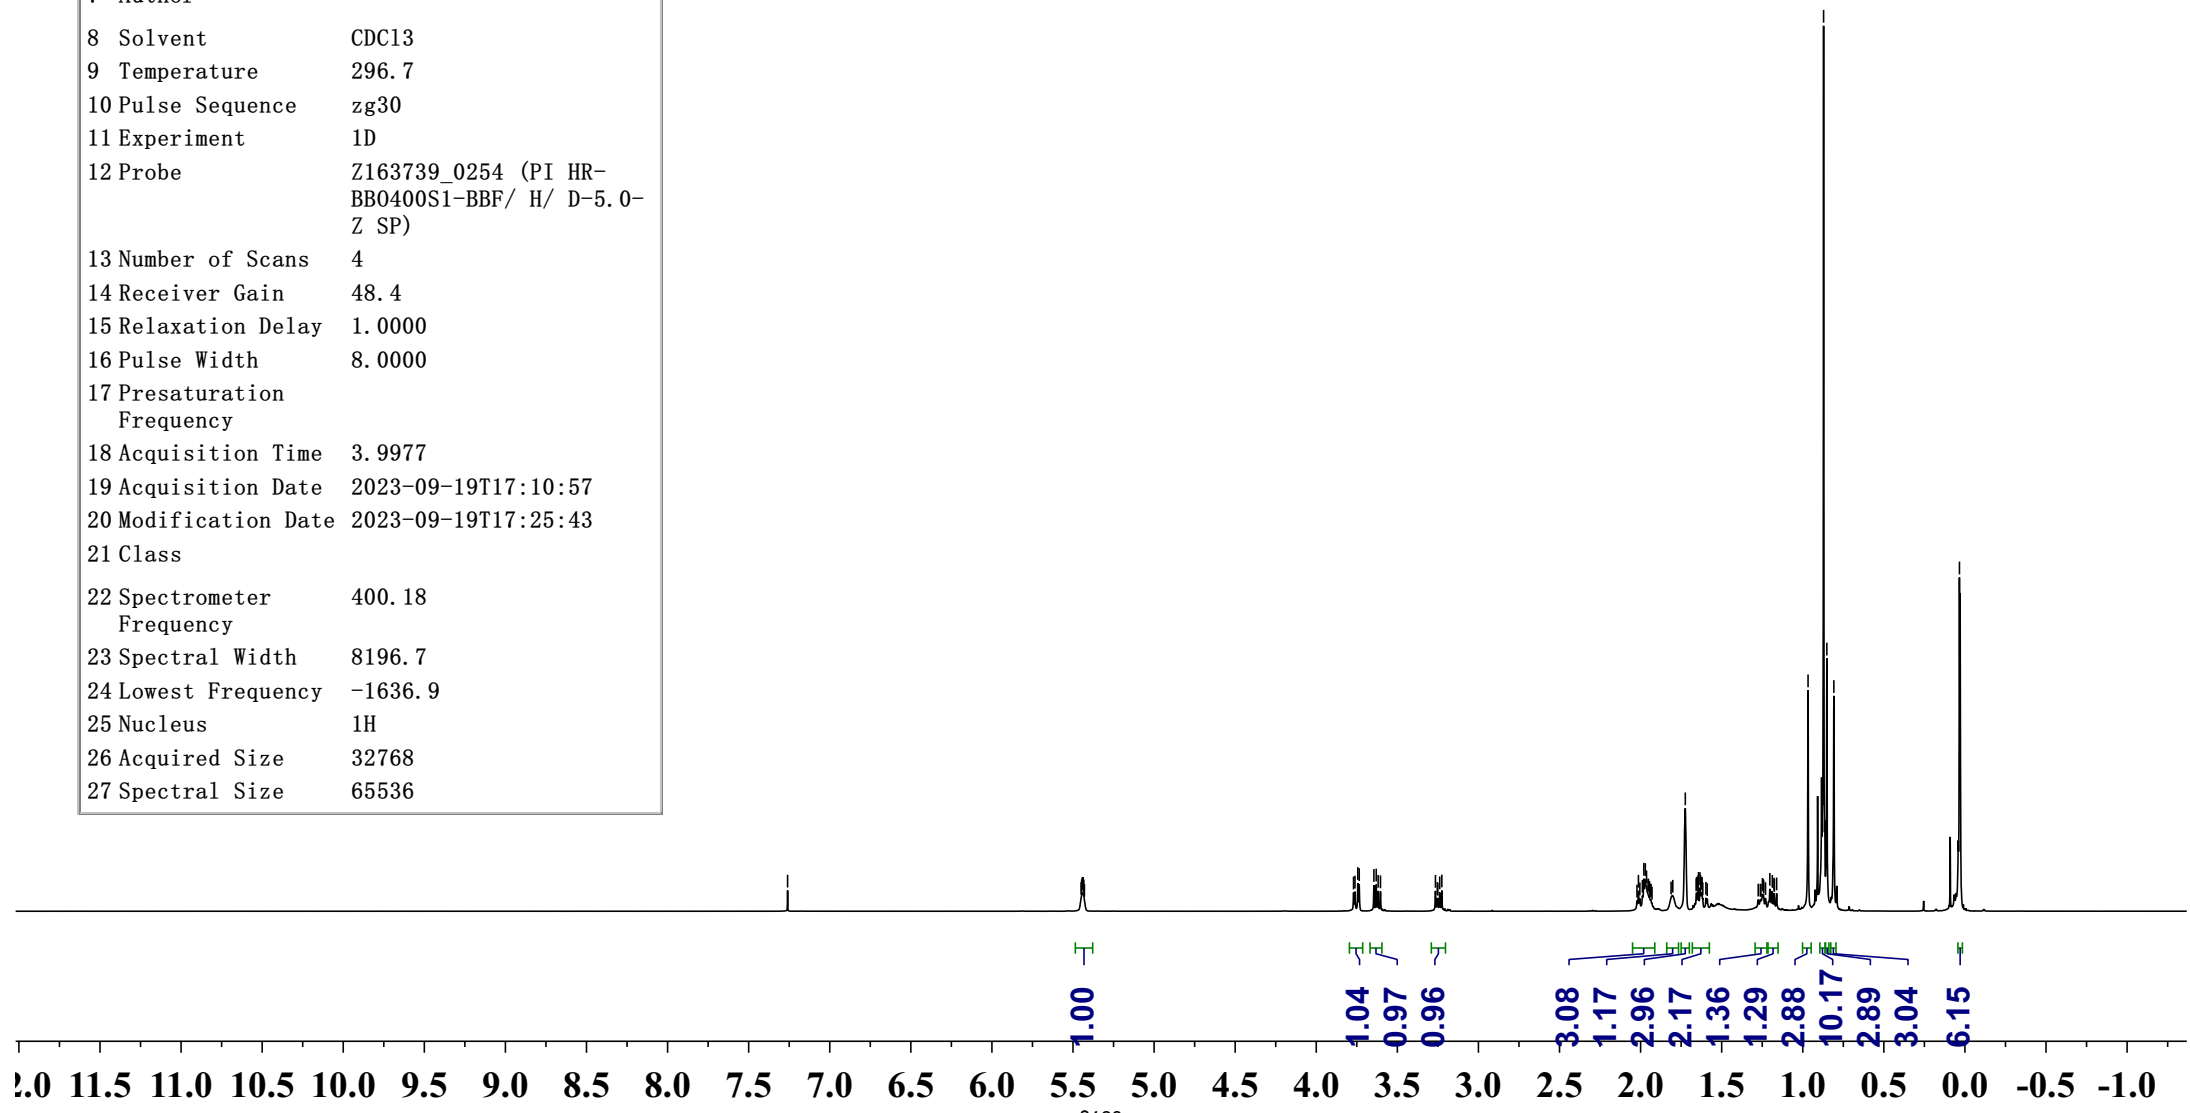

7.26  
5.45  
5.44  
5.44  
5.44  
5.43  
3.77  
3.76  
3.74  
3.74  
3.64  
3.63  
3.62  
3.60  
3.27  
3.25  
3.25  
3.24  
3.23  
2.02  
2.01  
2.00  
1.99  
1.98  
1.97  
1.96  
1.95  
1.95  
1.94  
1.94  
1.94  
1.93  
1.81  
1.80  
1.72  
1.66  
1.65  
1.65  
1.65  
1.64  
1.63  
1.63  
1.62  
1.62  
1.62  
1.60  
1.59  
1.27  
1.26  
1.26  
1.25  
1.24  
1.24  
1.23  
1.20  
1.19  
1.18  
1.18  
1.16  
0.97  
0.87  
0.85  
0.81  
0.03

| Parameter                  | Value                                            |
|----------------------------|--------------------------------------------------|
| 1 Title                    | YYP-G-078-1-1.4.1.1r                             |
| 2 Comment                  |                                                  |
| 3 Origin                   | Bruker BioSpin GmbH                              |
| 4 Owner                    | nmrsu                                            |
| 5 Site                     |                                                  |
| 6 Instrument               | Avance Neo 400M                                  |
| 7 Author                   |                                                  |
| 8 Solvent                  | CDC13                                            |
| 9 Temperature              | 297.1                                            |
| 10 Pulse Sequence          | zgpg30                                           |
| 11 Experiment              | 1D                                               |
| 12 Probe                   | Z163739_0254 (PI HR-BB0400S1-BBF/ H/ D-5.0-Z SP) |
| 13 Number of Scans         | 31                                               |
| 14 Receiver Gain           | 39.0                                             |
| 15 Relaxation Delay        | 2.0000                                           |
| 16 Pulse Width             | 7.8100                                           |
| 17 Presaturation Frequency |                                                  |
| 18 Acquisition Time        | 1.3763                                           |
| 19 Acquisition Date        | 2023-09-19T17:14:49                              |
| 20 Modification Date       | 2023-09-19T17:25:43                              |
| 21 Class                   |                                                  |
| 22 Spectrometer Frequency  | 100.63                                           |
| 23 Spectral Width          | 23809.5                                          |
| 24 Lowest Frequency        | -1829.6                                          |
| 25 Nucleus                 | 13C                                              |
| 26 Acquired Size           | 32768                                            |
| 27 Spectral Size           | 32768                                            |

—134.3      —122.5      —79.2 —77.5 —77.2 —76.8      —61.0 —56.9 —49.7      —38.8 —38.0 —35.9 —28.2 —27.6 —26.0 —26.0 —23.4 —22.0 —18.2 —15.4 —14.9      —5.3 —5.4

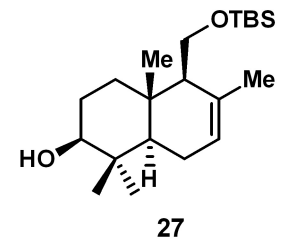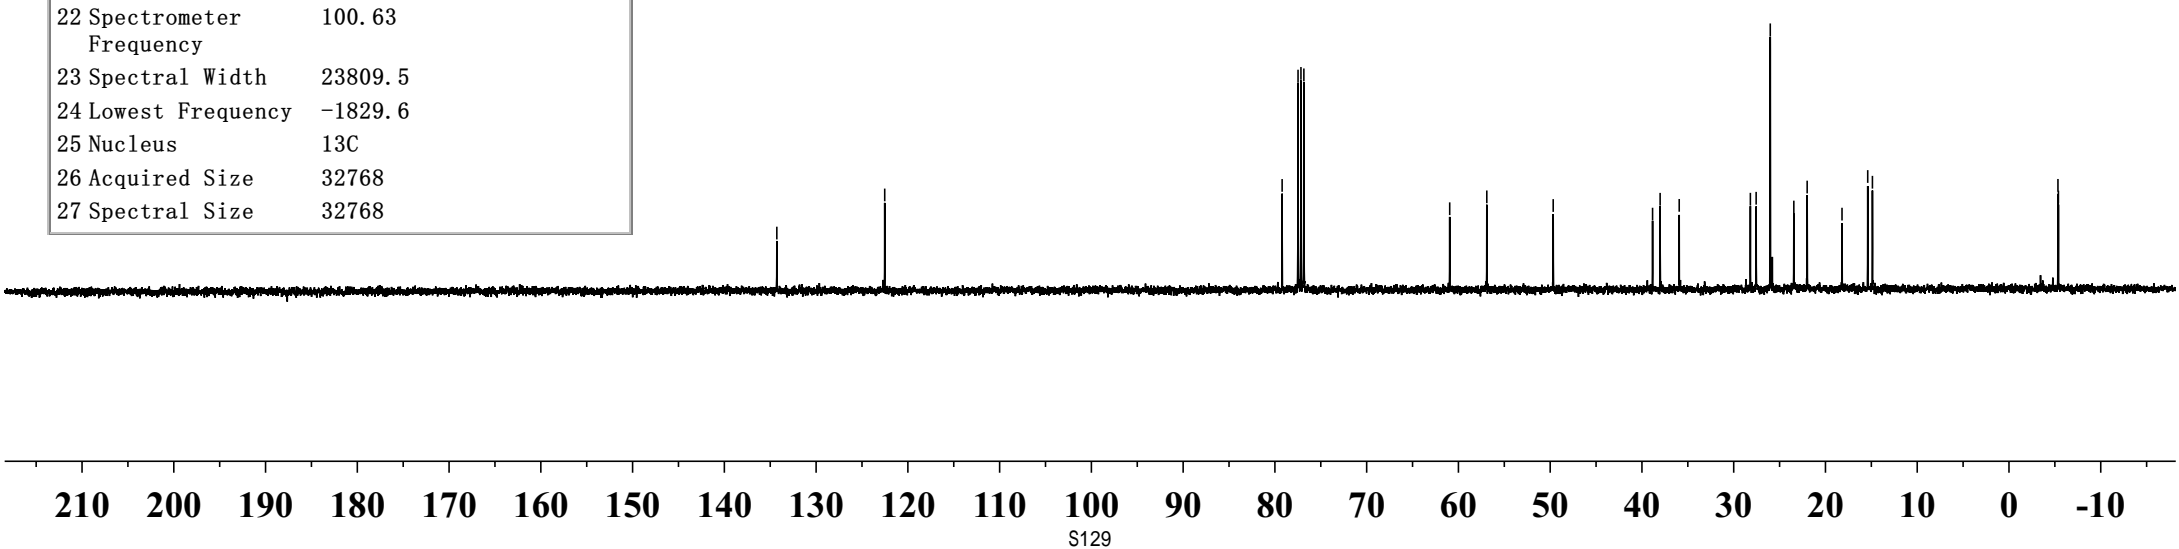

7.37  
7.35  
7.35  
7.33  
7.33  
7.32  
7.31  
7.28  
7.26  
7.24  
5.55  
5.54  
5.54  
4.70  
4.67  
4.46  
4.43  
3.87  
3.87  
3.85  
3.84  
3.76  
3.75  
3.73  
3.72  
2.98  
2.97  
2.95  
2.94  
2.07  
2.06  
2.05  
2.04  
2.03  
2.02  
1.99  
1.98  
1.98  
1.97  
1.96  
1.96  
1.95  
1.88  
1.87  
1.84  
1.84  
1.83  
1.78  
1.61  
1.60  
1.58  
1.57  
1.57  
1.55  
1.54  
1.53  
1.51  
1.50  
1.22  
1.21  
1.20  
1.19  
1.19  
1.17  
1.16  
0.99  
0.92  
0.87

| Parameter                     | Value                                          |
|-------------------------------|------------------------------------------------|
| 1 Title                       | YYP-G-082-1-3.1.1.1r                           |
| 2 Comment                     |                                                |
| 3 Origin                      | Bruker BioSpin GmbH                            |
| 4 Owner                       | nmsu                                           |
| 5 Site                        |                                                |
| 6 Instrument                  | Avance                                         |
| 7 Author                      |                                                |
| 8 Solvent                     | CDC13                                          |
| 9 Temperature                 | 295.3                                          |
| 10 Pulse Sequence             | zg30                                           |
| 11 Experiment                 | 1D                                             |
| 12 Probe                      | Z116098_0723 (PA BBO<br>400S1 BBF-H-D-05 Z SP) |
| 13 Number of Scans            | 8                                              |
| 14 Receiver Gain              | 101.0                                          |
| 15 Relaxation Delay           | 1.0000                                         |
| 16 Pulse Width                | 8.5800                                         |
| 17 Presaturation<br>Frequency |                                                |
| 18 Acquisition Time           | 3.9977                                         |
| 19 Acquisition Date           | 2023-09-21T18:48:10                            |
| 20 Modification Date          | 2023-09-21T19:56:53                            |
| 21 Class                      |                                                |
| 22 Spectrometer<br>Frequency  | 400.13                                         |
| 23 Spectral Width             | 8196.7                                         |
| 24 Lowest Frequency           | -1637.4                                        |
| 25 Nucleus                    | 1H                                             |
| 26 Acquired Size              | 32768                                          |
| 27 Spectral Size              | 65536                                          |

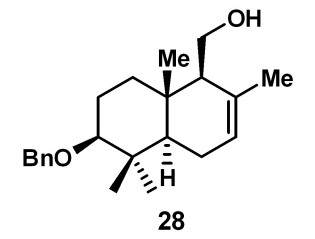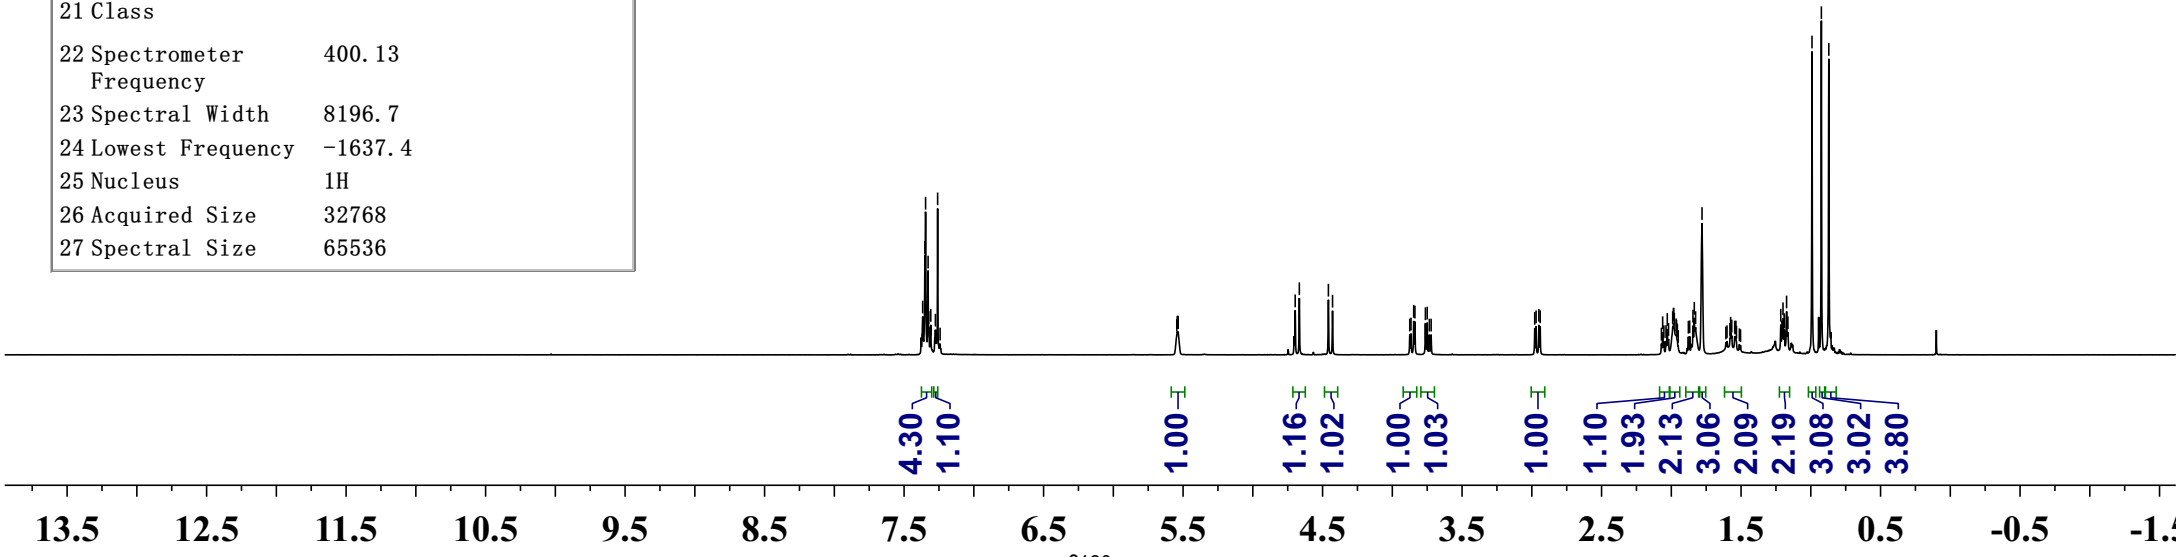

| Parameter                     | Value                                          |
|-------------------------------|------------------------------------------------|
| 1 Title                       | YYP-G-082-1-3.2.1.1r                           |
| 2 Comment                     |                                                |
| 3 Origin                      | Bruker BioSpin GmbH                            |
| 4 Owner                       | nMrsu                                          |
| 5 Site                        |                                                |
| 6 Instrument                  | Avance                                         |
| 7 Author                      |                                                |
| 8 Solvent                     | CDC13                                          |
| 9 Temperature                 | 295.7                                          |
| 10 Pulse Sequence             | zgpg30                                         |
| 11 Experiment                 | 1D                                             |
| 12 Probe                      | Z116098_0723 (PA BBO<br>400S1 BBF-H-D-05 Z SP) |
| 13 Number of Scans            | 100                                            |
| 14 Receiver Gain              | 57.0                                           |
| 15 Relaxation Delay           | 2.0000                                         |
| 16 Pulse Width                | 9.7000                                         |
| 17 Presaturation<br>Frequency |                                                |
| 18 Acquisition Time           | 1.3763                                         |
| 19 Acquisition Date           | 2023-09-21T18:55:19                            |
| 20 Modification Date          | 2023-09-21T19:56:57                            |
| 21 Class                      |                                                |
| 22 Spectrometer<br>Frequency  | 100.61                                         |
| 23 Spectral Width             | 23809.5                                        |
| 24 Lowest Frequency           | -1831.2                                        |
| 25 Nucleus                    | <sup>13</sup> C                                |
| 26 Acquired Size              | 32768                                          |
| 27 Spectral Size              | 32768                                          |

— 139.5  
 / 132.9  
 / 128.3  
 / 127.5  
 / 127.4  
 / 124.2

— 86.7

/ 77.5  
 / 77.2  
 / 76.8  
 / 71.6

— 61.0  
 — 57.2

— 50.0

/ 38.9  
 / 38.0  
 / 36.0

/ 28.5  
 / 23.3  
 / 23.0  
 / 21.9  
 / 16.5  
 / 15.1

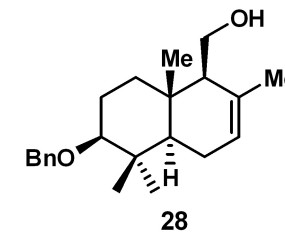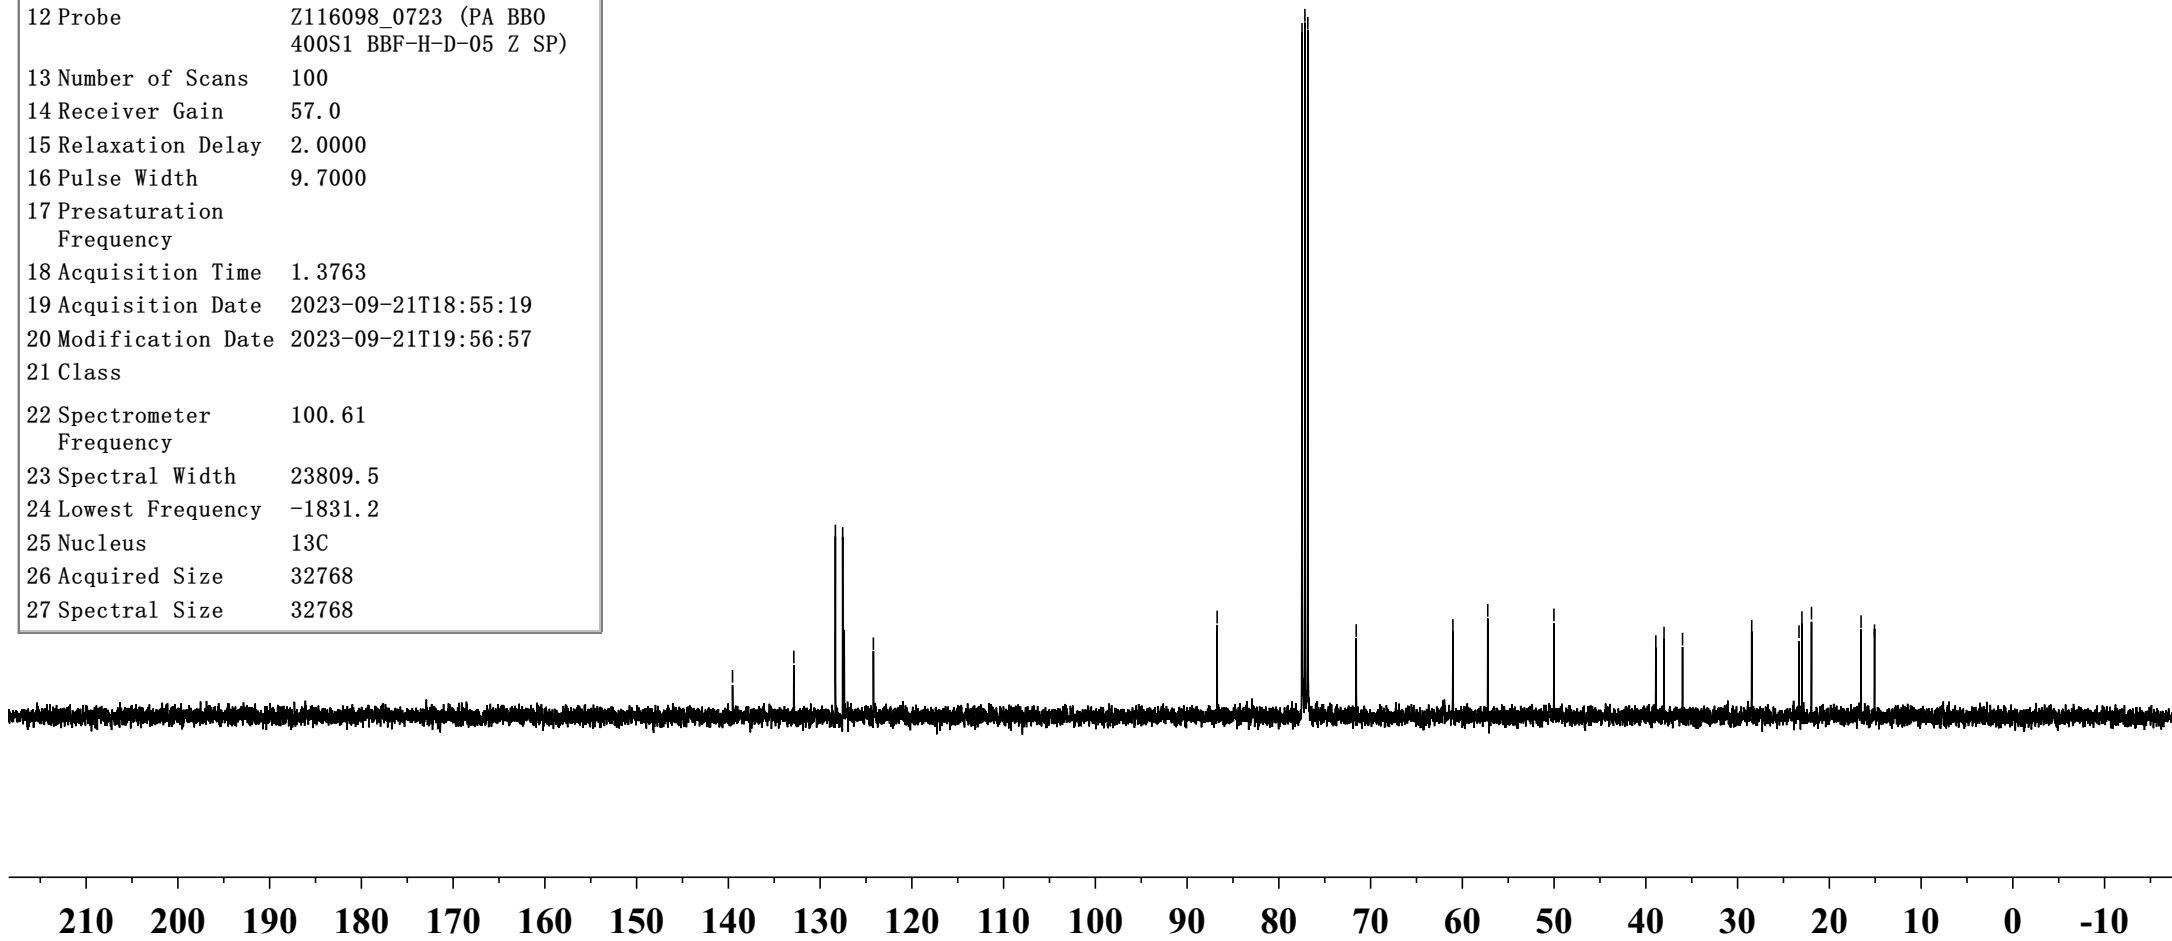

7.37  
7.35  
7.35  
7.34  
7.34  
7.33  
7.32  
7.32  
7.29  
7.28  
7.28  
7.28  
7.27  
7.27  
7.26  
7.26  
7.26  
7.25  
5.51  
5.51  
5.50  
5.50  
5.49  
5.49  
5.49  
4.70  
4.67  
4.46  
4.43  
4.43  
3.67  
3.66  
3.64  
3.63  
3.31  
3.31  
3.30  
3.29  
3.27  
3.27  
2.98  
2.97  
2.95  
2.94  
2.37  
2.36  
2.35  
2.35  
2.04  
2.04  
2.03  
2.02  
2.01  
2.00  
2.00  
1.99  
1.98  
1.98  
1.98  
1.97  
1.96  
1.96  
1.95  
1.95  
1.91  
1.91  
1.90  
1.90  
1.87  
1.57  
1.57  
1.56  
1.56  
1.54  
1.54  
1.53  
1.53  
1.29  
1.28  
1.27  
1.25  
1.24  
1.24  
1.23  
1.22  
1.21  
1.19  
0.99  
0.92  
0.84

| Parameter                     | Value                                             |
|-------------------------------|---------------------------------------------------|
| 1 Title                       | YYP-G-106-2-1.2. fid                              |
| 2 Comment                     |                                                   |
| 3 Origin                      | Bruker BioSpin GmbH                               |
| 4 Owner                       | nmrsu                                             |
| 5 Site                        |                                                   |
| 6 Instrument                  | AVANCE NEO 400 MHZ<br>DIGITAL NMR<br>SPECTROMETER |
| 7 Author                      |                                                   |
| 8 Solvent                     | CDC13                                             |
| 9 Temperature                 | 298.1                                             |
| 10 Pulse Sequence             | zg30                                              |
| 11 Experiment                 | 1D                                                |
| 12 Probe                      | Z116098_0723 (PA BBO<br>400S1 BBF-H-D-05 Z SP)    |
| 13 Number of Scans            | 4                                                 |
| 14 Receiver Gain              | 101.0                                             |
| 15 Relaxation Delay           | 1.0000                                            |
| 16 Pulse Width                | 8.8100                                            |
| 17 Presaturation<br>Frequency |                                                   |
| 18 Acquisition Time           | 3.9977                                            |
| 19 Acquisition Date           | 2023-11-04T15:23:52                               |
| 20 Modification Date          | 2023-11-04T15:31:06                               |
| 21 Class                      |                                                   |
| 22 Spectrometer<br>Frequency  | 400.13                                            |
| 23 Spectral Width             | 8196.7                                            |
| 24 Lowest Frequency           | -1637.0                                           |
| 25 Nucleus                    | 1H                                                |
| 26 Acquired Size              | 32768                                             |
| 27 Spectral Size              | 65536                                             |

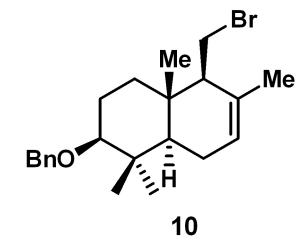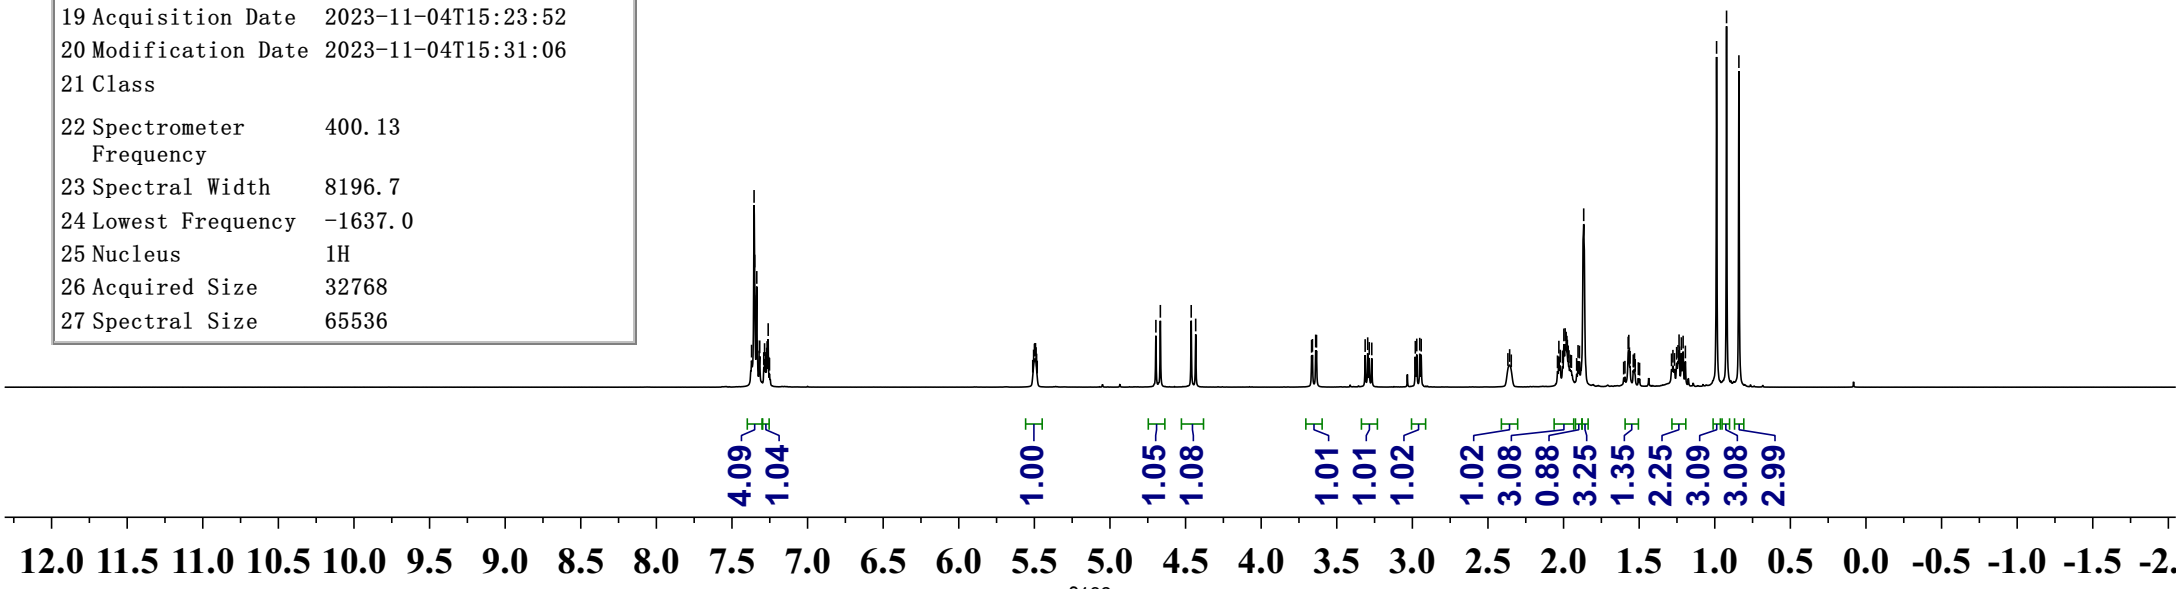



| Parameter                     | Value                                             |
|-------------------------------|---------------------------------------------------|
| 1 Title                       | YYP-G-106-2-1.3.fid                               |
| 2 Comment                     |                                                   |
| 3 Origin                      | Bruker BioSpin GmbH                               |
| 4 Owner                       | nmrsu                                             |
| 5 Site                        |                                                   |
| 6 Instrument                  | AVANCE NEO 400 MHZ<br>DIGITAL NMR<br>SPECTROMETER |
| 7 Author                      |                                                   |
| 8 Solvent                     | CDC13                                             |
| 9 Temperature                 | 298.2                                             |
| 10 Pulse Sequence             | zgpg30                                            |
| 11 Experiment                 | 1D                                                |
| 12 Probe                      | Z116098_0723 (PA BBO<br>400S1 BBF-H-D-05 Z SP)    |
| 13 Number of Scans            | 62                                                |
| 14 Receiver Gain              | 64.0                                              |
| 15 Relaxation Delay           | 2.0000                                            |
| 16 Pulse Width                | 10.0000                                           |
| 17 Presaturation<br>Frequency |                                                   |
| 18 Acquisition Time           | 1.3763                                            |
| 19 Acquisition Date           | 2023-11-04T15:28:23                               |
| 20 Modification Date          | 2023-11-04T15:31:06                               |
| 21 Class                      |                                                   |
| 22 Spectrometer<br>Frequency  | 100.62                                            |
| 23 Spectral Width             | 23809.5                                           |
| 24 Lowest Frequency           | -1831.6                                           |
| 25 Nucleus                    | 13C                                               |
| 26 Acquired Size              | 32768                                             |
| 27 Spectral Size              | 65536                                             |

—139.4  
 /132.5  
 /128.3  
 /127.6  
 /127.4  
 /124.0

—86.4  
 /77.5  
 /77.2  
 /76.8  
 /71.6

—57.8  
 —50.0

/39.0  
 /37.6  
 /37.4  
 —31.2  
 —28.3  
 /23.3  
 /22.9  
 /21.7  
 /16.4  
 /14.1

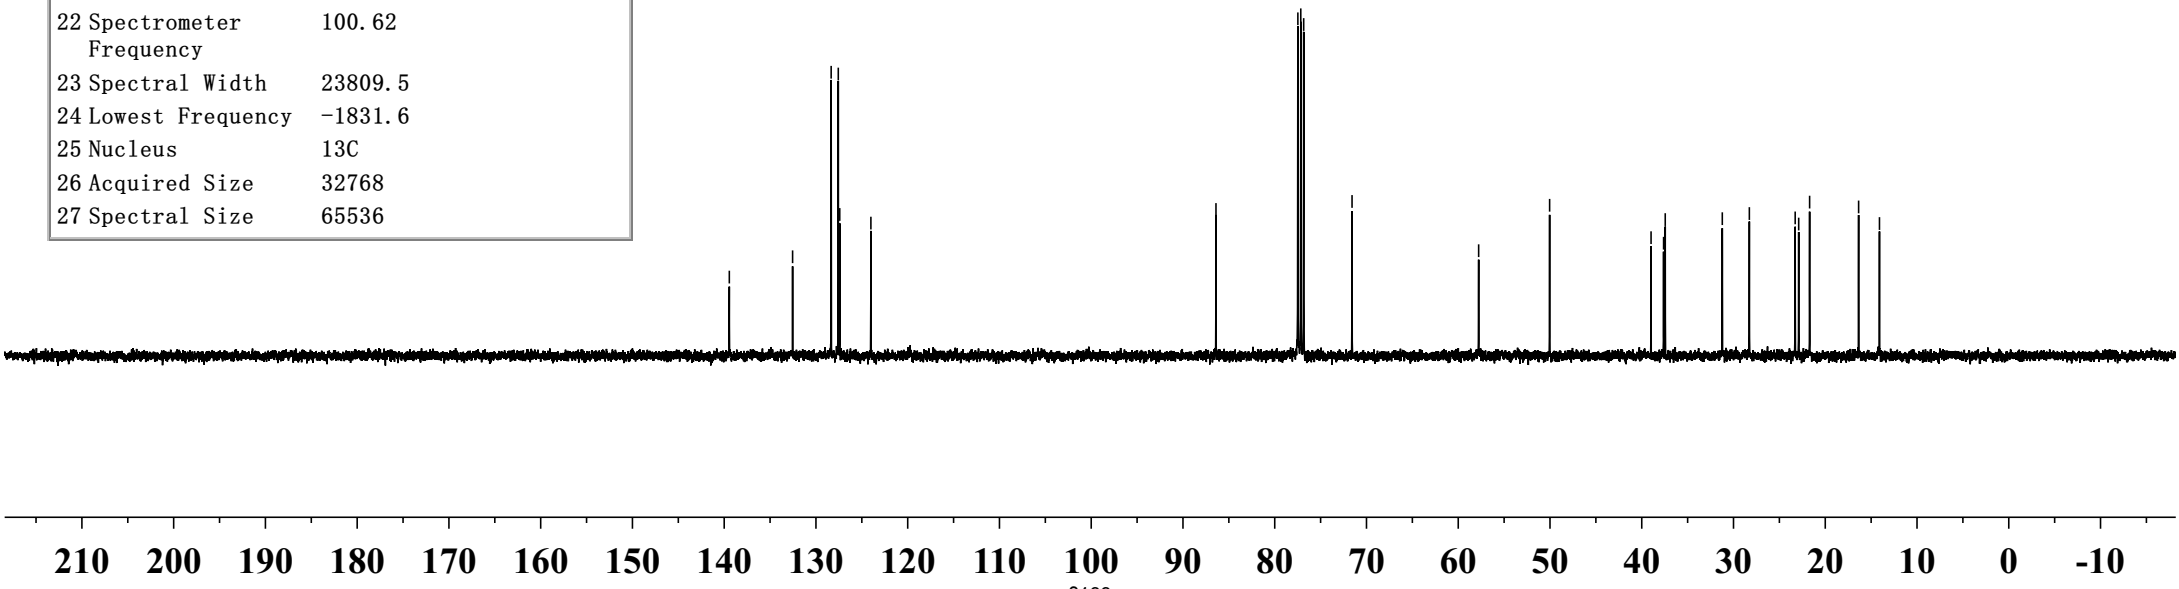

| Parameter                     | Value                                          |
|-------------------------------|------------------------------------------------|
| 1 Title                       | YYP-G-085-1-3.3.1.1r                           |
| 2 Comment                     |                                                |
| 3 Origin                      | Bruker BioSpin GmbH                            |
| 4 Owner                       | nmrsu                                          |
| 5 Site                        |                                                |
| 6 Instrument                  | Avance NEO 600                                 |
| 7 Author                      |                                                |
| 8 Solvent                     | CDC13                                          |
| 9 Temperature                 | 298.1                                          |
| 10 Pulse Sequence             | zg30                                           |
| 11 Experiment                 | 1D                                             |
| 12 Probe                      | Z114607_0339 (PA BBO<br>600S3 BBF-H-D-05 Z SP) |
| 13 Number of Scans            | 2                                              |
| 14 Receiver Gain              | 71.8                                           |
| 15 Relaxation Delay           | 1.0000                                         |
| 16 Pulse Width                | 10.0000                                        |
| 17 Presaturation<br>Frequency |                                                |
| 18 Acquisition Time           | 2.7525                                         |
| 19 Acquisition Date           | 2023-09-23T17:00:01                            |
| 20 Modification Date          | 2023-09-23T17:24:40                            |
| 21 Class                      |                                                |
| 22 Spectrometer<br>Frequency  | 600.15                                         |
| 23 Spectral Width             | 11904.8                                        |
| 24 Lowest Frequency           | -2260.9                                        |
| 25 Nucleus                    | 1H                                             |
| 26 Acquired Size              | 32768                                          |
| 27 Spectral Size              | 65536                                          |

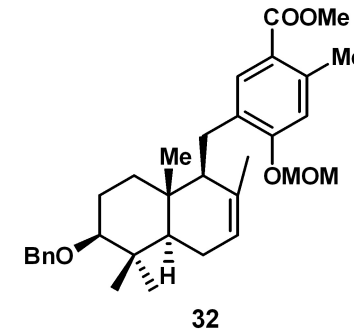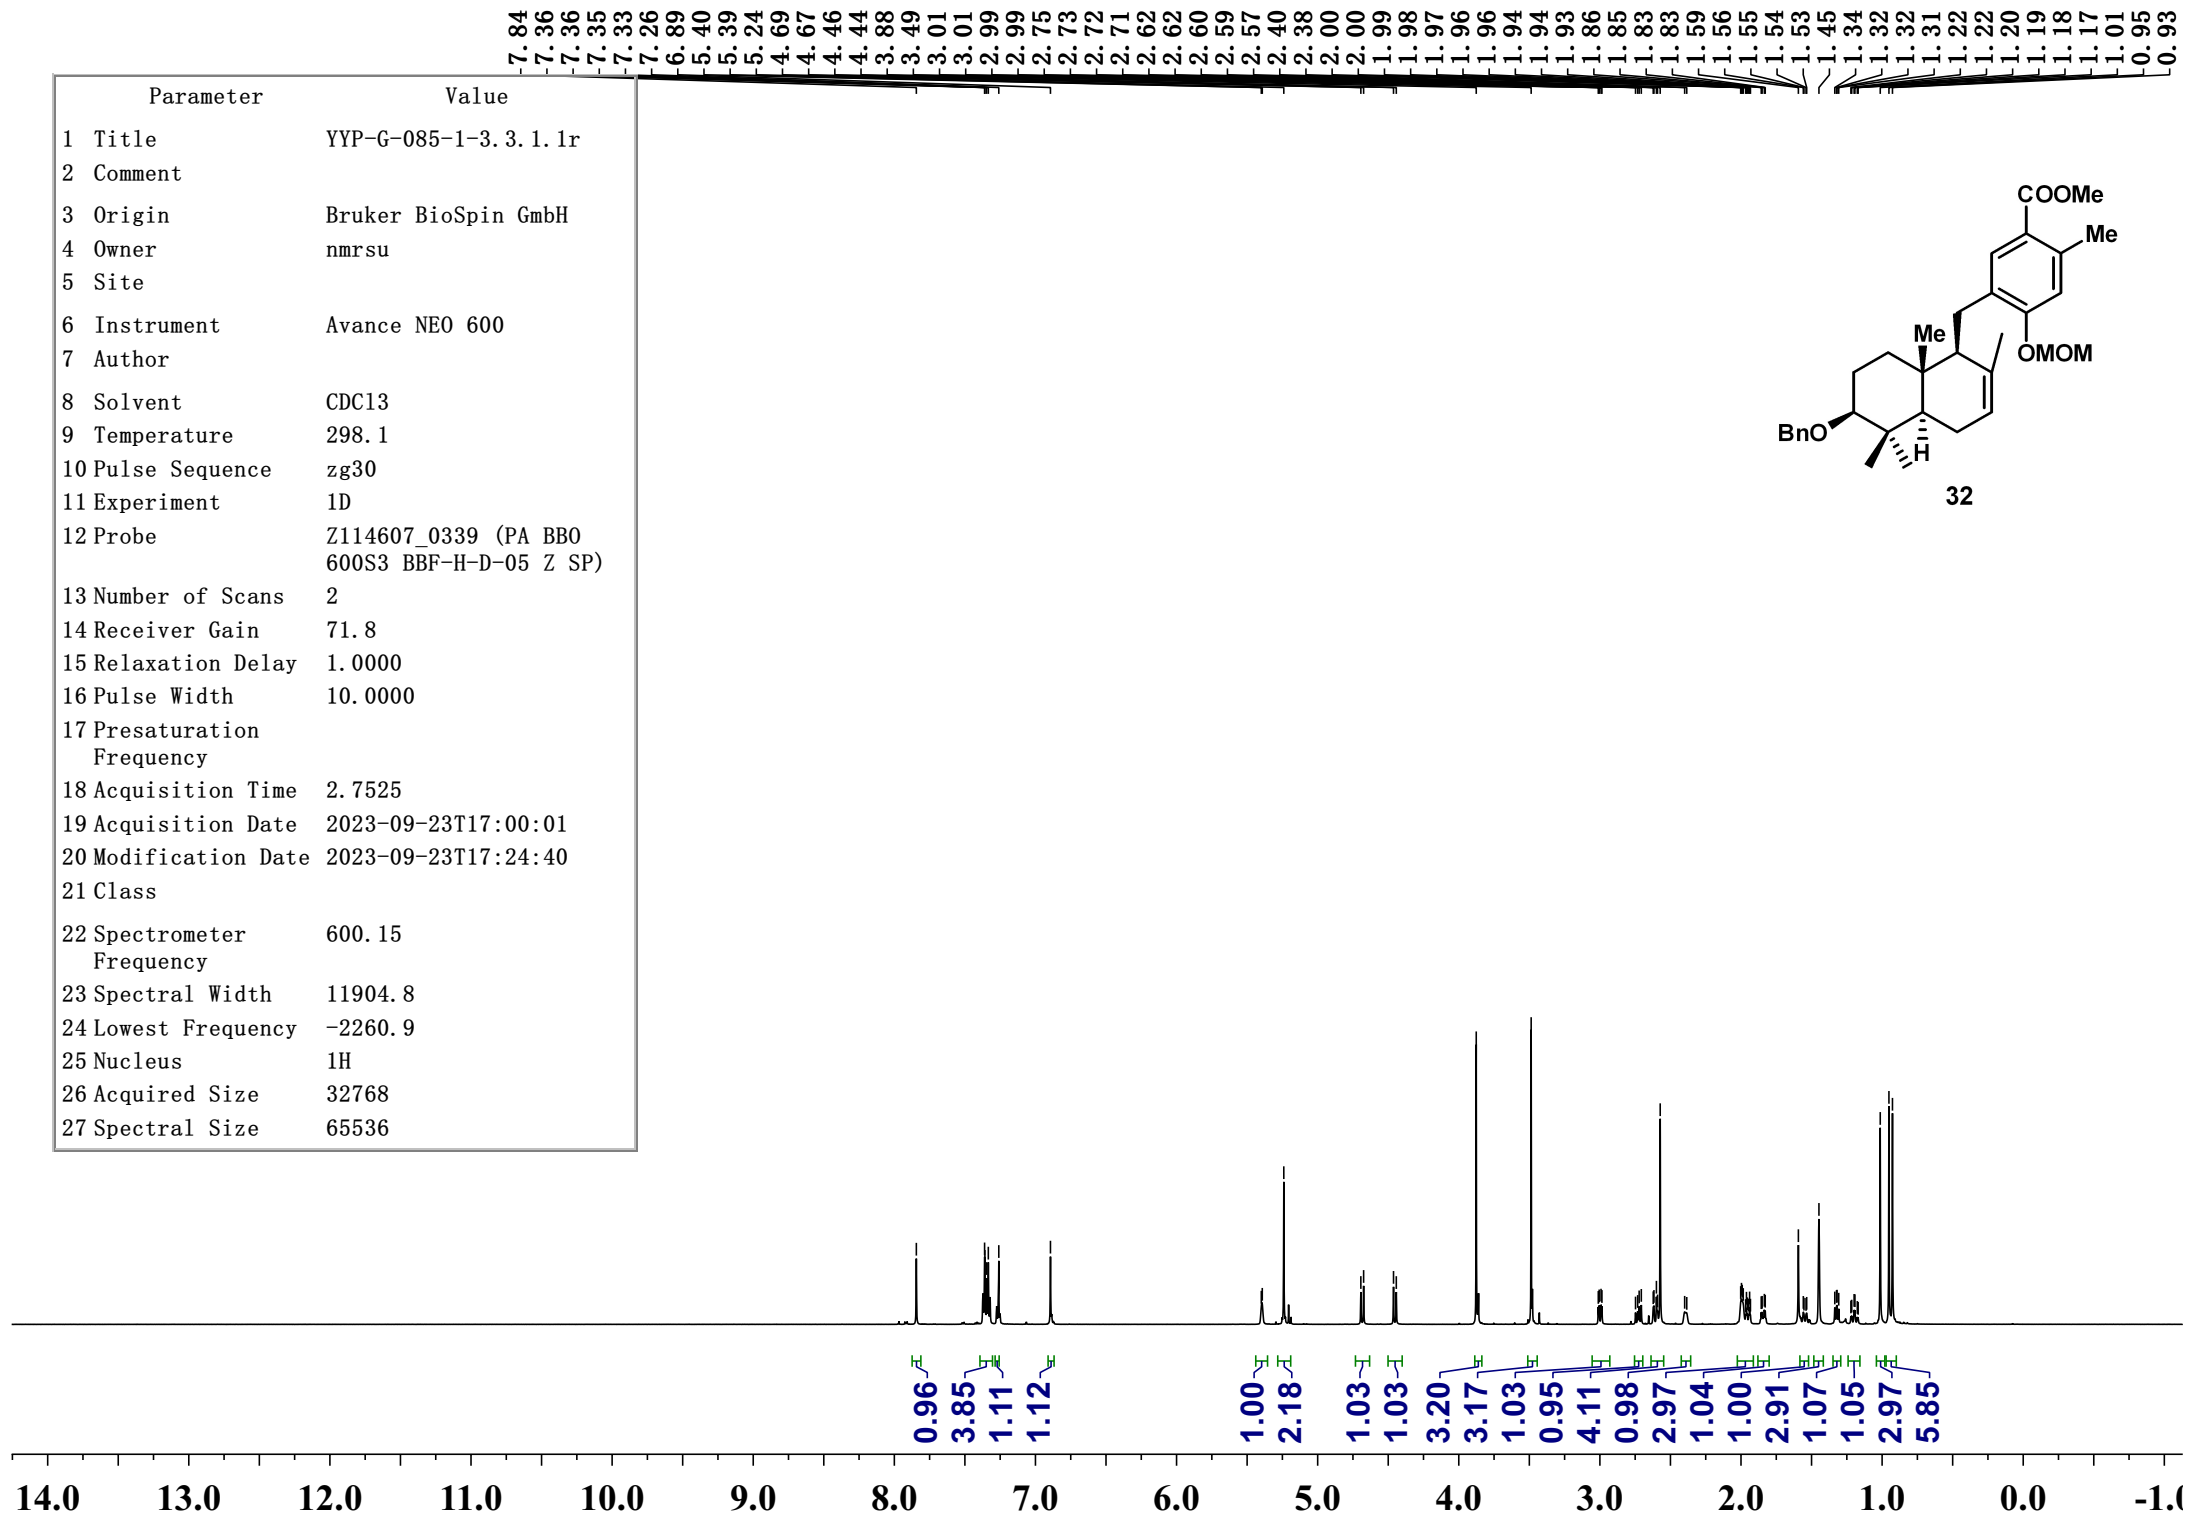

7.84  
7.36  
7.36  
7.35  
7.33  
7.26  
6.89  
5.40  
5.39  
5.24  
4.69  
4.67  
4.46  
4.44  
3.88  
3.49  
3.01  
3.01  
2.99  
2.99  
2.75  
2.73  
2.72  
2.71  
2.62  
2.62  
2.60  
2.59  
2.57  
2.40  
2.38  
2.00  
2.00  
1.99  
1.98  
1.97  
1.96  
1.96  
1.94  
1.94  
1.93  
1.86  
1.85  
1.83  
1.83  
1.59  
1.56  
1.55  
1.54  
1.53  
1.45  
1.34  
1.32  
1.32  
1.31  
1.22  
1.22  
1.20  
1.19  
1.18  
1.17  
1.01  
0.95  
0.93

| Parameter                  | Value                                            |
|----------------------------|--------------------------------------------------|
| 1 Title                    | YYP-G-085-1-3.5.1.1r                             |
| 2 Comment                  |                                                  |
| 3 Origin                   | Bruker BioSpin GmbH                              |
| 4 Owner                    | nmrsu                                            |
| 5 Site                     |                                                  |
| 6 Instrument               | Avance Neo 400M                                  |
| 7 Author                   |                                                  |
| 8 Solvent                  | CDC13                                            |
| 9 Temperature              | 297.4                                            |
| 10 Pulse Sequence          | zgpg30                                           |
| 11 Experiment              | 1D                                               |
| 12 Probe                   | Z163739_0254 (PI HR-BB0400S1-BBF/ H/ D-5.0-Z SP) |
| 13 Number of Scans         | 111                                              |
| 14 Receiver Gain           | 37.2                                             |
| 15 Relaxation Delay        | 2.0000                                           |
| 16 Pulse Width             | 7.8100                                           |
| 17 Presaturation Frequency |                                                  |
| 18 Acquisition Time        | 1.3763                                           |
| 19 Acquisition Date        | 2023-09-23T17:14:42                              |
| 20 Modification Date       | 2023-09-23T17:24:41                              |
| 21 Class                   |                                                  |
| 22 Spectrometer Frequency  | 100.63                                           |
| 23 Spectral Width          | 23809.5                                          |
| 24 Lowest Frequency        | -1842.2                                          |
| 25 Nucleus                 | 13C                                              |
| 26 Acquired Size           | 32768                                            |
| 27 Spectral Size           | 32768                                            |

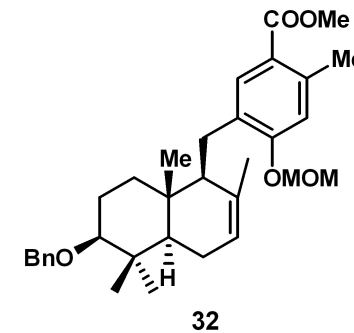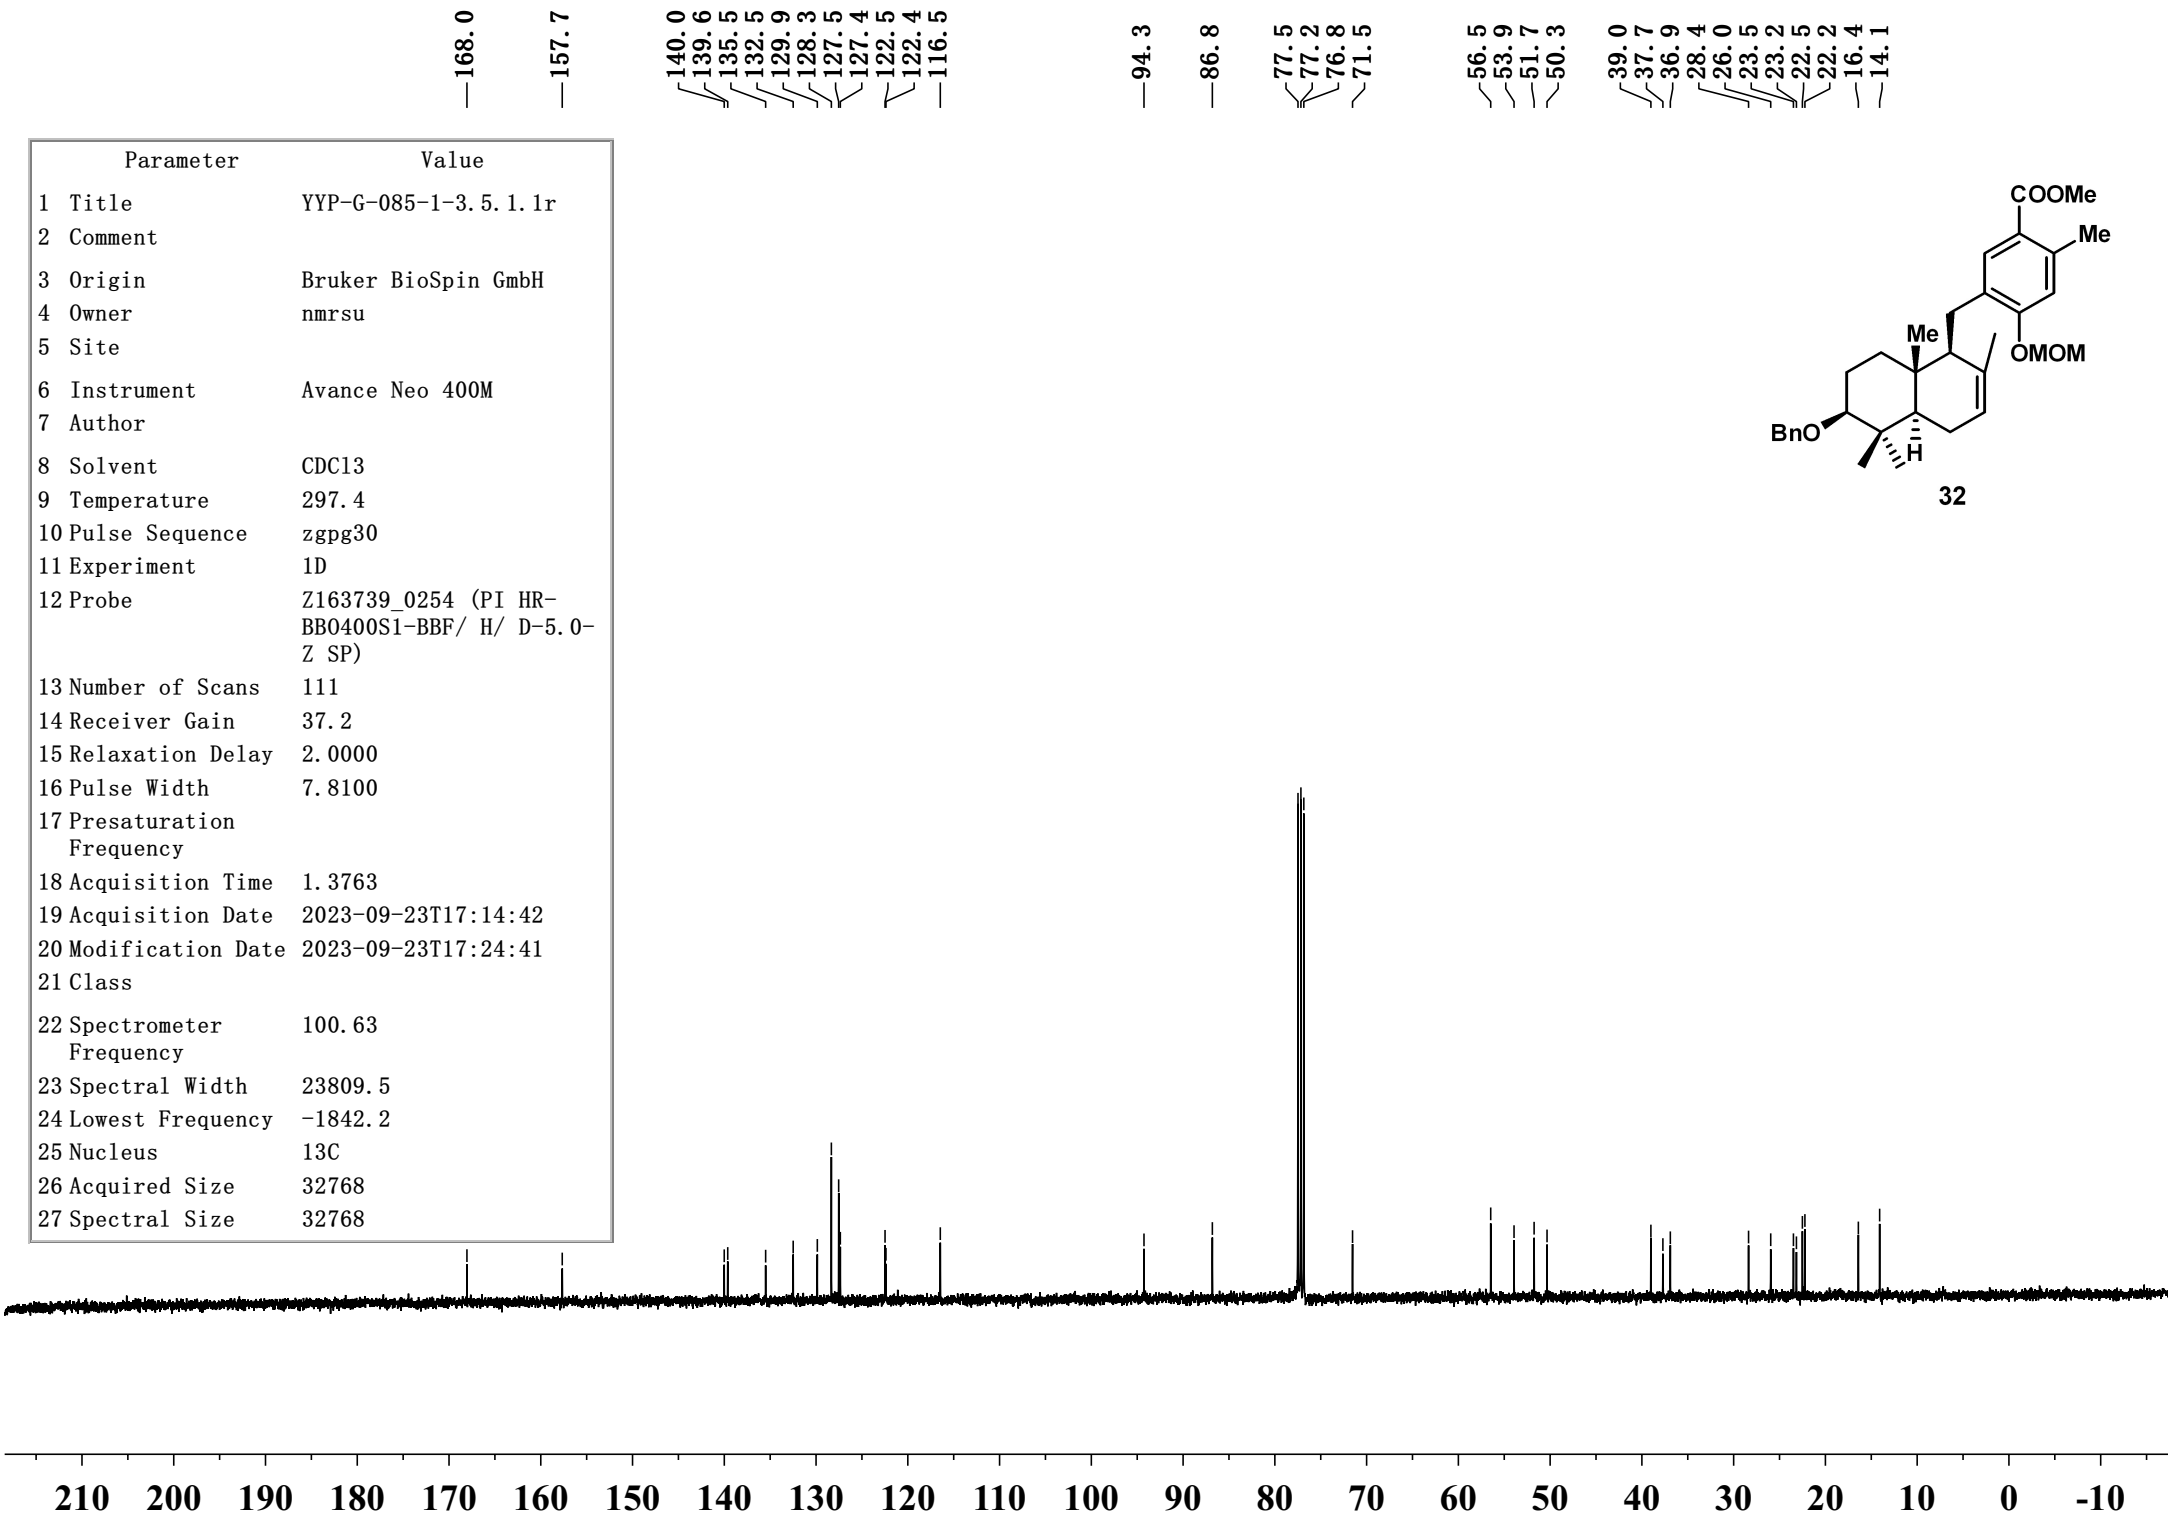

| Parameter                     | Value                                          |
|-------------------------------|------------------------------------------------|
| 1 Title                       | YYP-G-088-1-1.11.1.1r                          |
| 2 Comment                     |                                                |
| 3 Origin                      | Bruker BioSpin GmbH                            |
| 4 Owner                       | nmrsu                                          |
| 5 Site                        |                                                |
| 6 Instrument                  | Avance NEO 600                                 |
| 7 Author                      |                                                |
| 8 Solvent                     | CDC13                                          |
| 9 Temperature                 | 298.2                                          |
| 10 Pulse Sequence             | zg30                                           |
| 11 Experiment                 | 1D                                             |
| 12 Probe                      | Z114607_0339 (PA BBO<br>600S3 BBF-H-D-05 Z SP) |
| 13 Number of Scans            | 6                                              |
| 14 Receiver Gain              | 101.0                                          |
| 15 Relaxation Delay           | 1.0000                                         |
| 16 Pulse Width                | 10.0000                                        |
| 17 Presaturation<br>Frequency |                                                |
| 18 Acquisition Time           | 2.7525                                         |
| 19 Acquisition Date           | 2023-09-25T22:16:11                            |
| 20 Modification Date          | 2023-09-25T22:37:11                            |
| 21 Class                      |                                                |
| 22 Spectrometer<br>Frequency  | 600.15                                         |
| 23 Spectral Width             | 11904.8                                        |
| 24 Lowest Frequency           | -2260.9                                        |
| 25 Nucleus                    | 1H                                             |
| 26 Acquired Size              | 32768                                          |
| 27 Spectral Size              | 65536                                          |

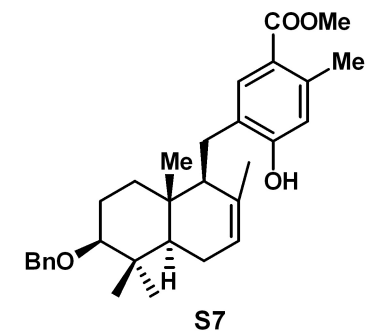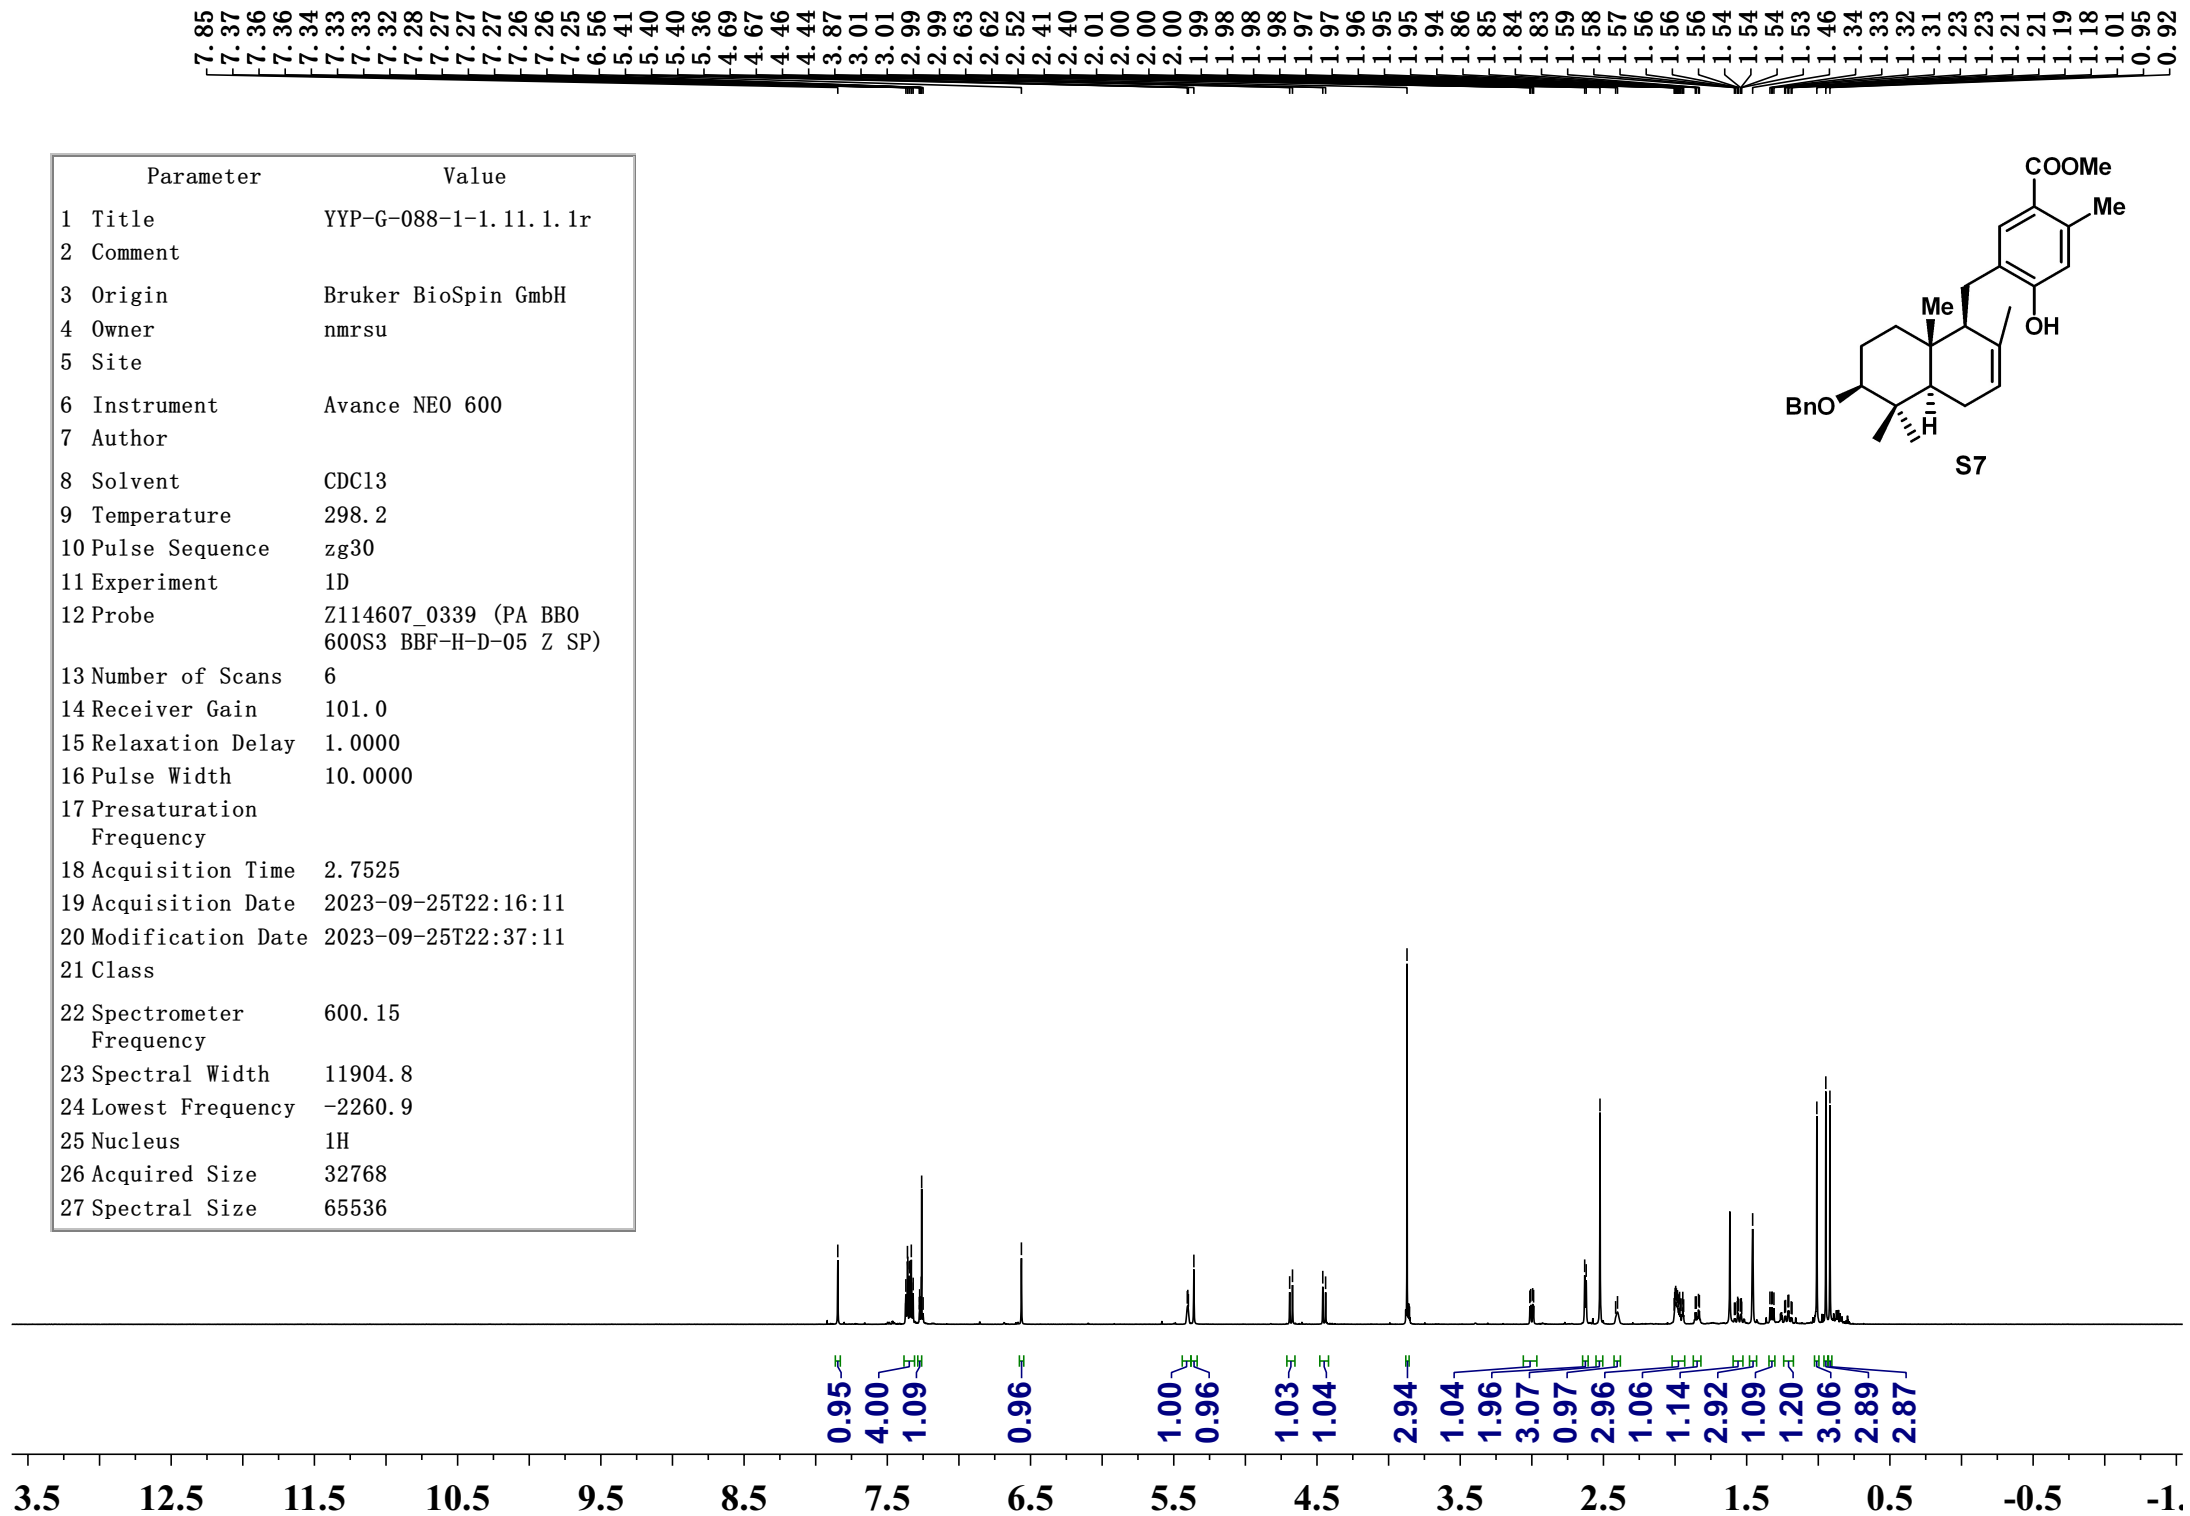

| Parameter                     | Value                                          |
|-------------------------------|------------------------------------------------|
| 1 Title                       | YYP-G-088-1-1.12.1.1r                          |
| 2 Comment                     |                                                |
| 3 Origin                      | Bruker BioSpin GmbH                            |
| 4 Owner                       | nmsu                                           |
| 5 Site                        |                                                |
| 6 Instrument                  | Avance NEO 600                                 |
| 7 Author                      |                                                |
| 8 Solvent                     | CDC13                                          |
| 9 Temperature                 | 298.1                                          |
| 10 Pulse Sequence             | zgpg30                                         |
| 11 Experiment                 | 1D                                             |
| 12 Probe                      | Z114607_0339 (PA BBO<br>600S3 BBF-H-D-05 Z SP) |
| 13 Number of Scans            | 151                                            |
| 14 Receiver Gain              | 101.0                                          |
| 15 Relaxation Delay           | 2.0000                                         |
| 16 Pulse Width                | 11.5000                                        |
| 17 Presaturation<br>Frequency |                                                |
| 18 Acquisition Time           | 0.9175                                         |
| 19 Acquisition Date           | 2023-09-25T22:24:59                            |
| 20 Modification Date          | 2023-09-25T22:37:12                            |
| 21 Class                      |                                                |
| 22 Spectrometer<br>Frequency  | 150.91                                         |
| 23 Spectral Width             | 35714.3                                        |
| 24 Lowest Frequency           | -2746.4                                        |
| 25 Nucleus                    | 13C                                            |
| 26 Acquired Size              | 32768                                          |
| 27 Spectral Size              | 32768                                          |

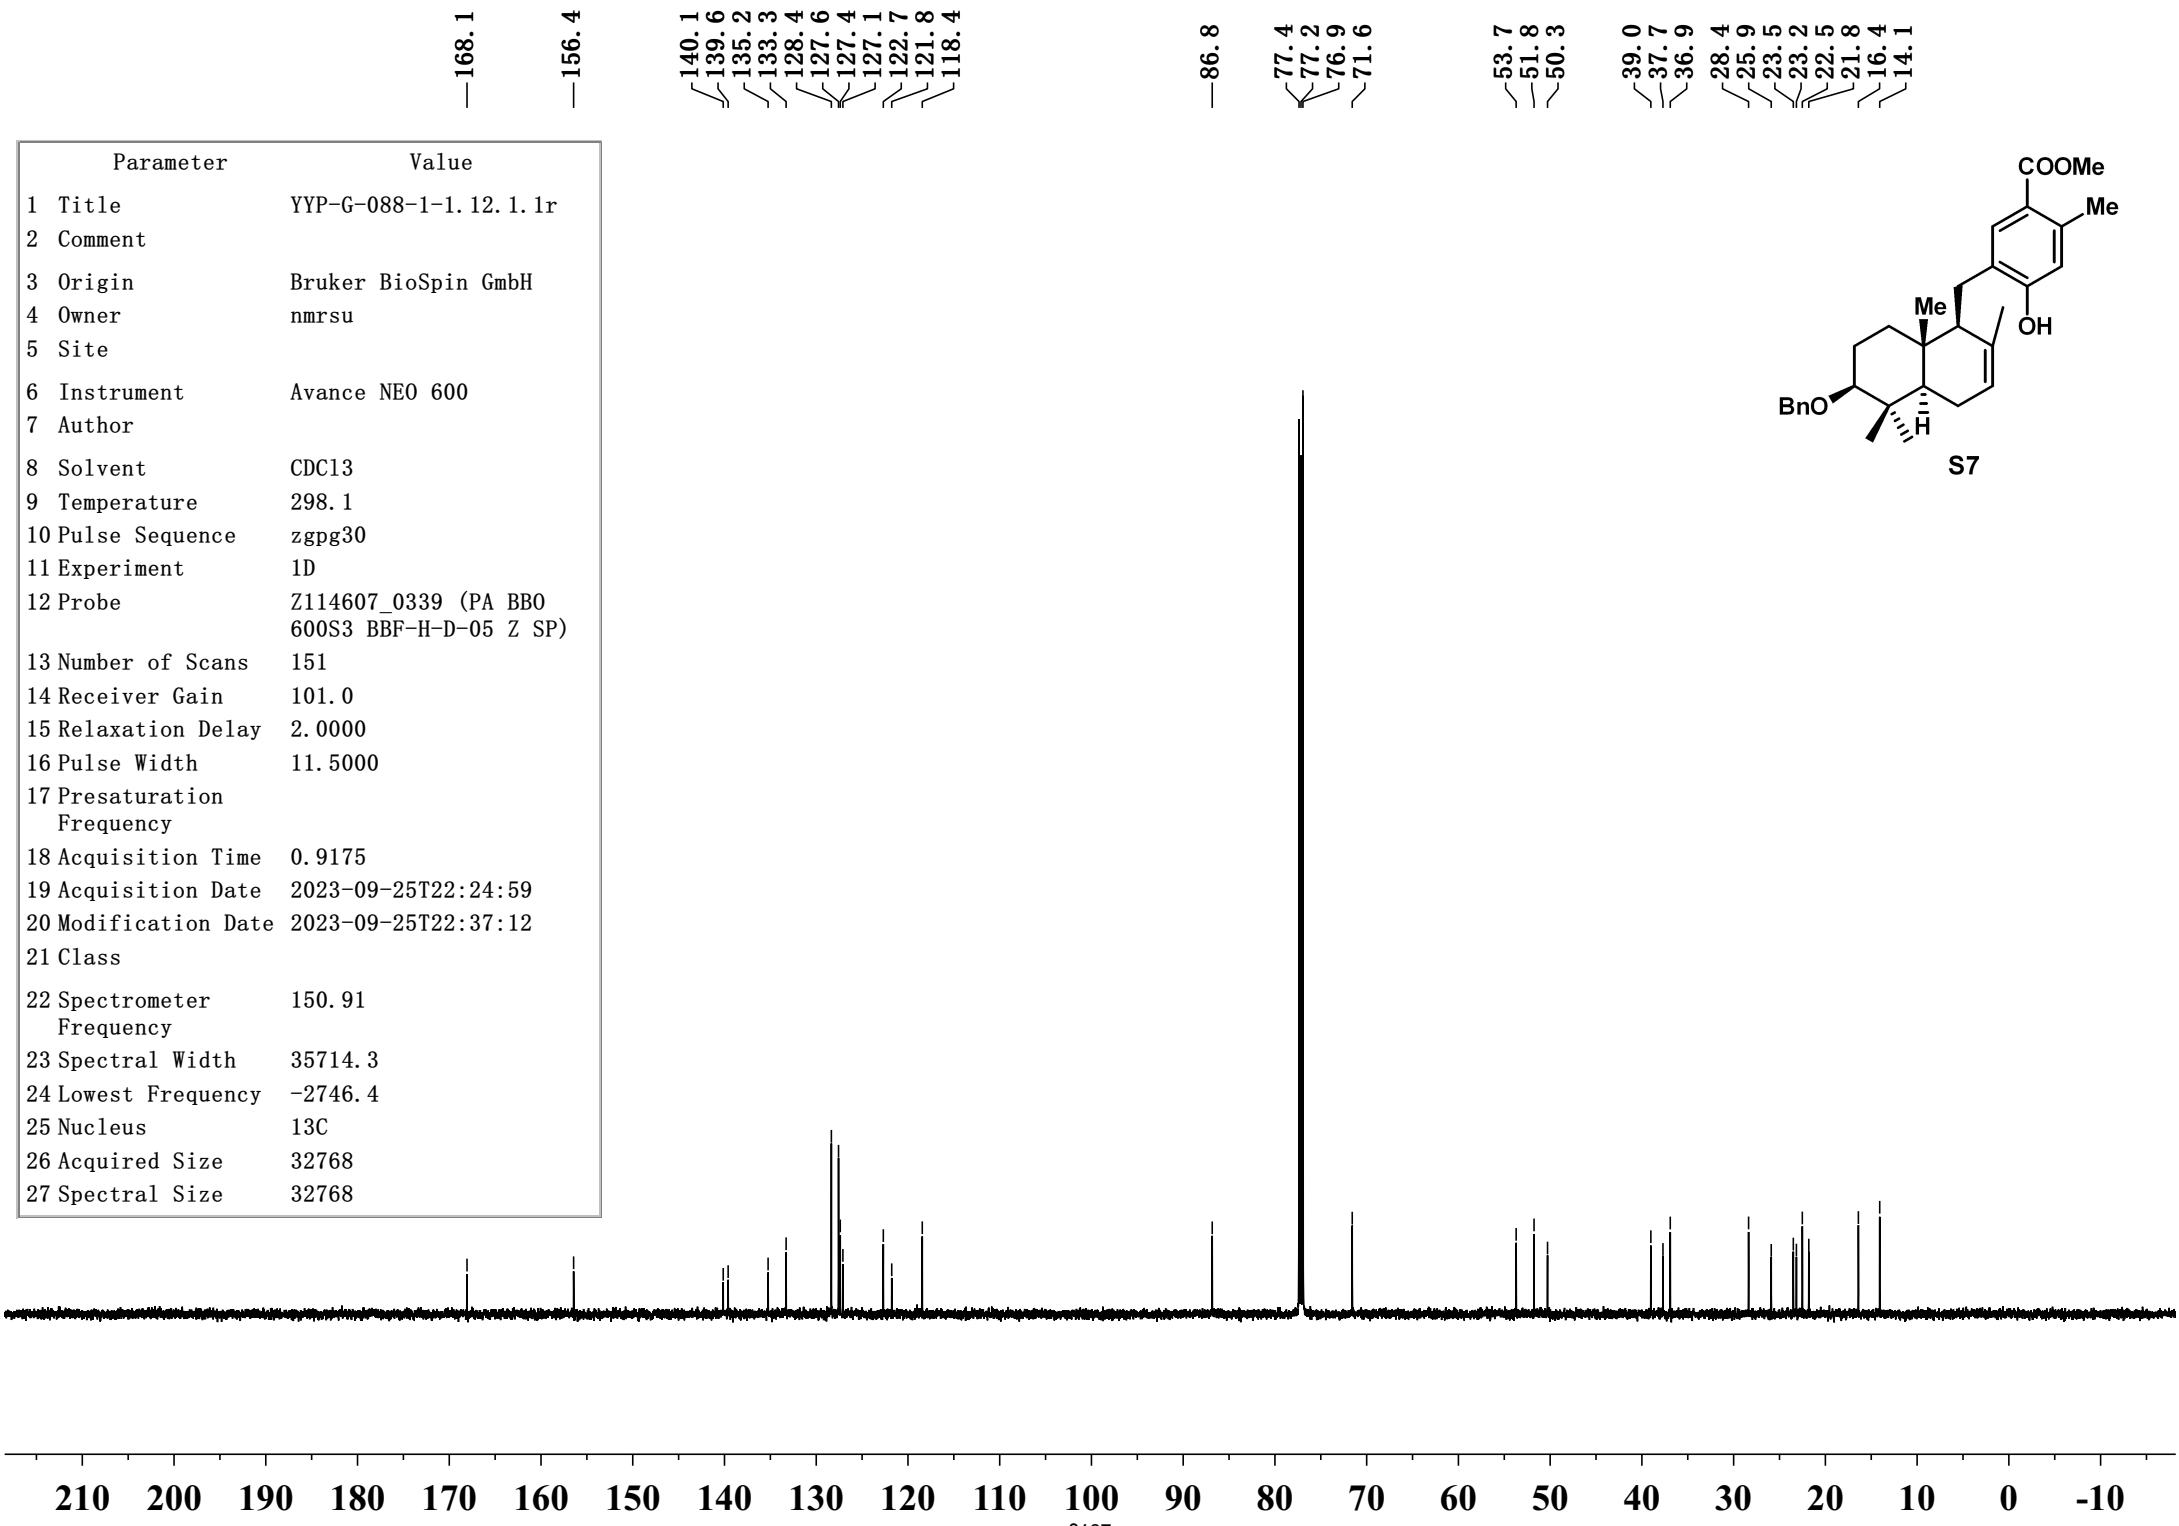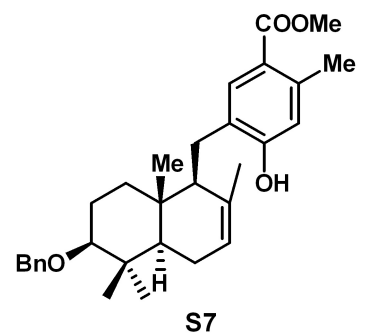

7.73  
7.37  
7.36  
7.35  
7.35  
7.35  
7.34  
7.33  
7.33  
7.33  
7.32  
7.32  
7.28  
7.28  
7.27  
7.27  
7.26  
7.26  
7.25  
7.25  
6.61  
4.69  
4.67  
4.45  
4.43  
3.84  
2.97  
2.96  
2.95  
2.94  
2.62  
2.60  
2.60  
2.52  
2.10  
2.10  
2.09  
2.08  
2.08  
2.07  
1.91  
1.90  
1.88  
1.88  
1.79  
1.78  
1.78  
1.77  
1.76  
1.76  
1.69  
1.68  
1.68  
1.67  
1.66  
1.66  
1.66  
1.65  
1.65  
1.64  
1.61  
1.60  
1.60  
1.56  
1.56  
1.54  
1.44  
1.44  
1.44  
1.42  
1.42  
1.42  
1.20  
1.03  
1.02  
1.02  
1.01  
0.92  
0.87

| Parameter                     | Value                                          |
|-------------------------------|------------------------------------------------|
| 1 Title                       | YYP-G-089-1-1.3.1.1r                           |
| 2 Comment                     |                                                |
| 3 Origin                      | Bruker BioSpin GmbH                            |
| 4 Owner                       | nmrsu                                          |
| 5 Site                        |                                                |
| 6 Instrument                  | Avance NEO 600                                 |
| 7 Author                      |                                                |
| 8 Solvent                     | CDC13                                          |
| 9 Temperature                 | 298.2                                          |
| 10 Pulse Sequence             | zg30                                           |
| 11 Experiment                 | 1D                                             |
| 12 Probe                      | Z114607_0339 (PA BBO<br>600S3 BBF-H-D-05 Z SP) |
| 13 Number of Scans            | 6                                              |
| 14 Receiver Gain              | 101.0                                          |
| 15 Relaxation Delay           | 1.0000                                         |
| 16 Pulse Width                | 10.0000                                        |
| 17 Presaturation<br>Frequency |                                                |
| 18 Acquisition Time           | 2.7525                                         |
| 19 Acquisition Date           | 2023-09-26T11:29:12                            |
| 20 Modification Date          | 2023-09-26T12:13:44                            |
| 21 Class                      |                                                |
| 22 Spectrometer<br>Frequency  | 600.15                                         |
| 23 Spectral Width             | 11904.8                                        |
| 24 Lowest Frequency           | -2260.9                                        |
| 25 Nucleus                    | 1H                                             |
| 26 Acquired Size              | 32768                                          |
| 27 Spectral Size              | 65536                                          |

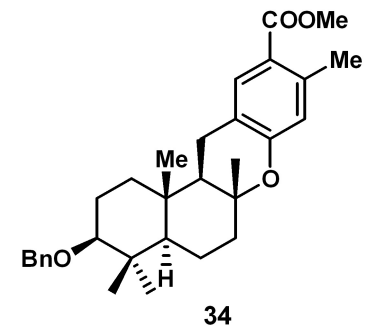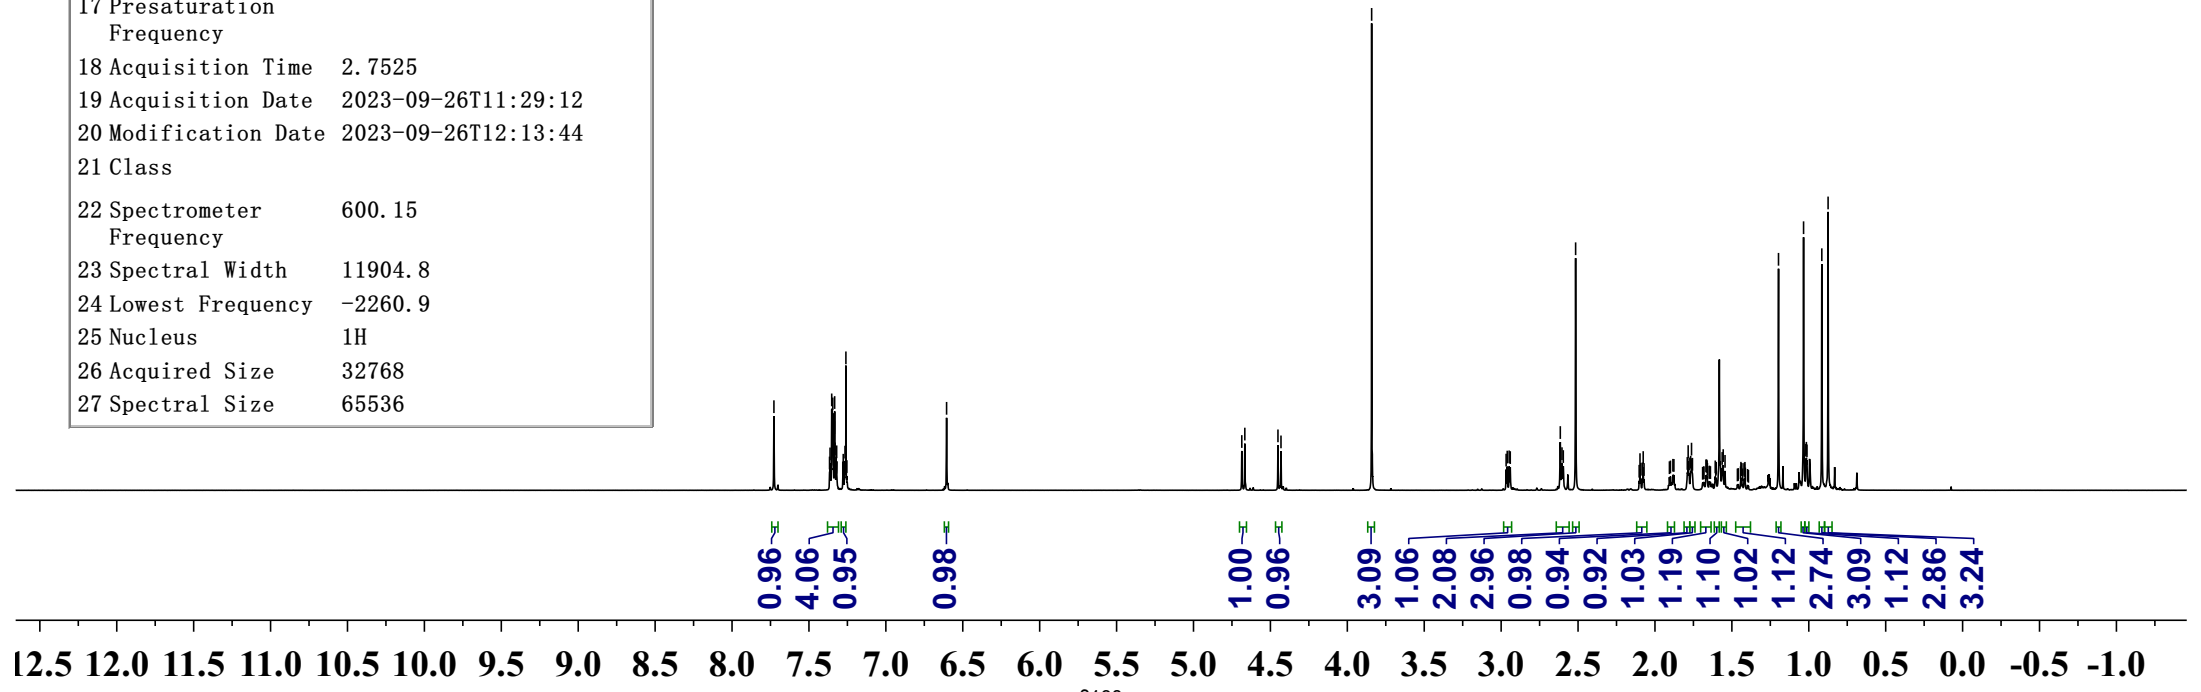

| Parameter                     | Value                                          |
|-------------------------------|------------------------------------------------|
| 1 Title                       | YYP-G-089-1-1.4.1.1r                           |
| 2 Comment                     |                                                |
| 3 Origin                      | Bruker BioSpin GmbH                            |
| 4 Owner                       | nmrsu                                          |
| 5 Site                        |                                                |
| 6 Instrument                  | Avance NEO 600                                 |
| 7 Author                      |                                                |
| 8 Solvent                     | CDC13                                          |
| 9 Temperature                 | 298.1                                          |
| 10 Pulse Sequence             | zgpg30                                         |
| 11 Experiment                 | 1D                                             |
| 12 Probe                      | Z114607_0339 (PA BBO<br>600S3 BBF-H-D-05 Z SP) |
| 13 Number of Scans            | 156                                            |
| 14 Receiver Gain              | 101.0                                          |
| 15 Relaxation Delay           | 2.0000                                         |
| 16 Pulse Width                | 11.5000                                        |
| 17 Presaturation<br>Frequency |                                                |
| 18 Acquisition Time           | 0.9175                                         |
| 19 Acquisition Date           | 2023-09-26T11:38:44                            |
| 20 Modification Date          | 2023-09-26T12:13:44                            |
| 21 Class                      |                                                |
| 22 Spectrometer<br>Frequency  | 150.91                                         |
| 23 Spectral Width             | 35714.3                                        |
| 24 Lowest Frequency           | -2747.2                                        |
| 25 Nucleus                    | <sup>13</sup> C                                |
| 26 Acquired Size              | 32768                                          |
| 27 Spectral Size              | 32768                                          |

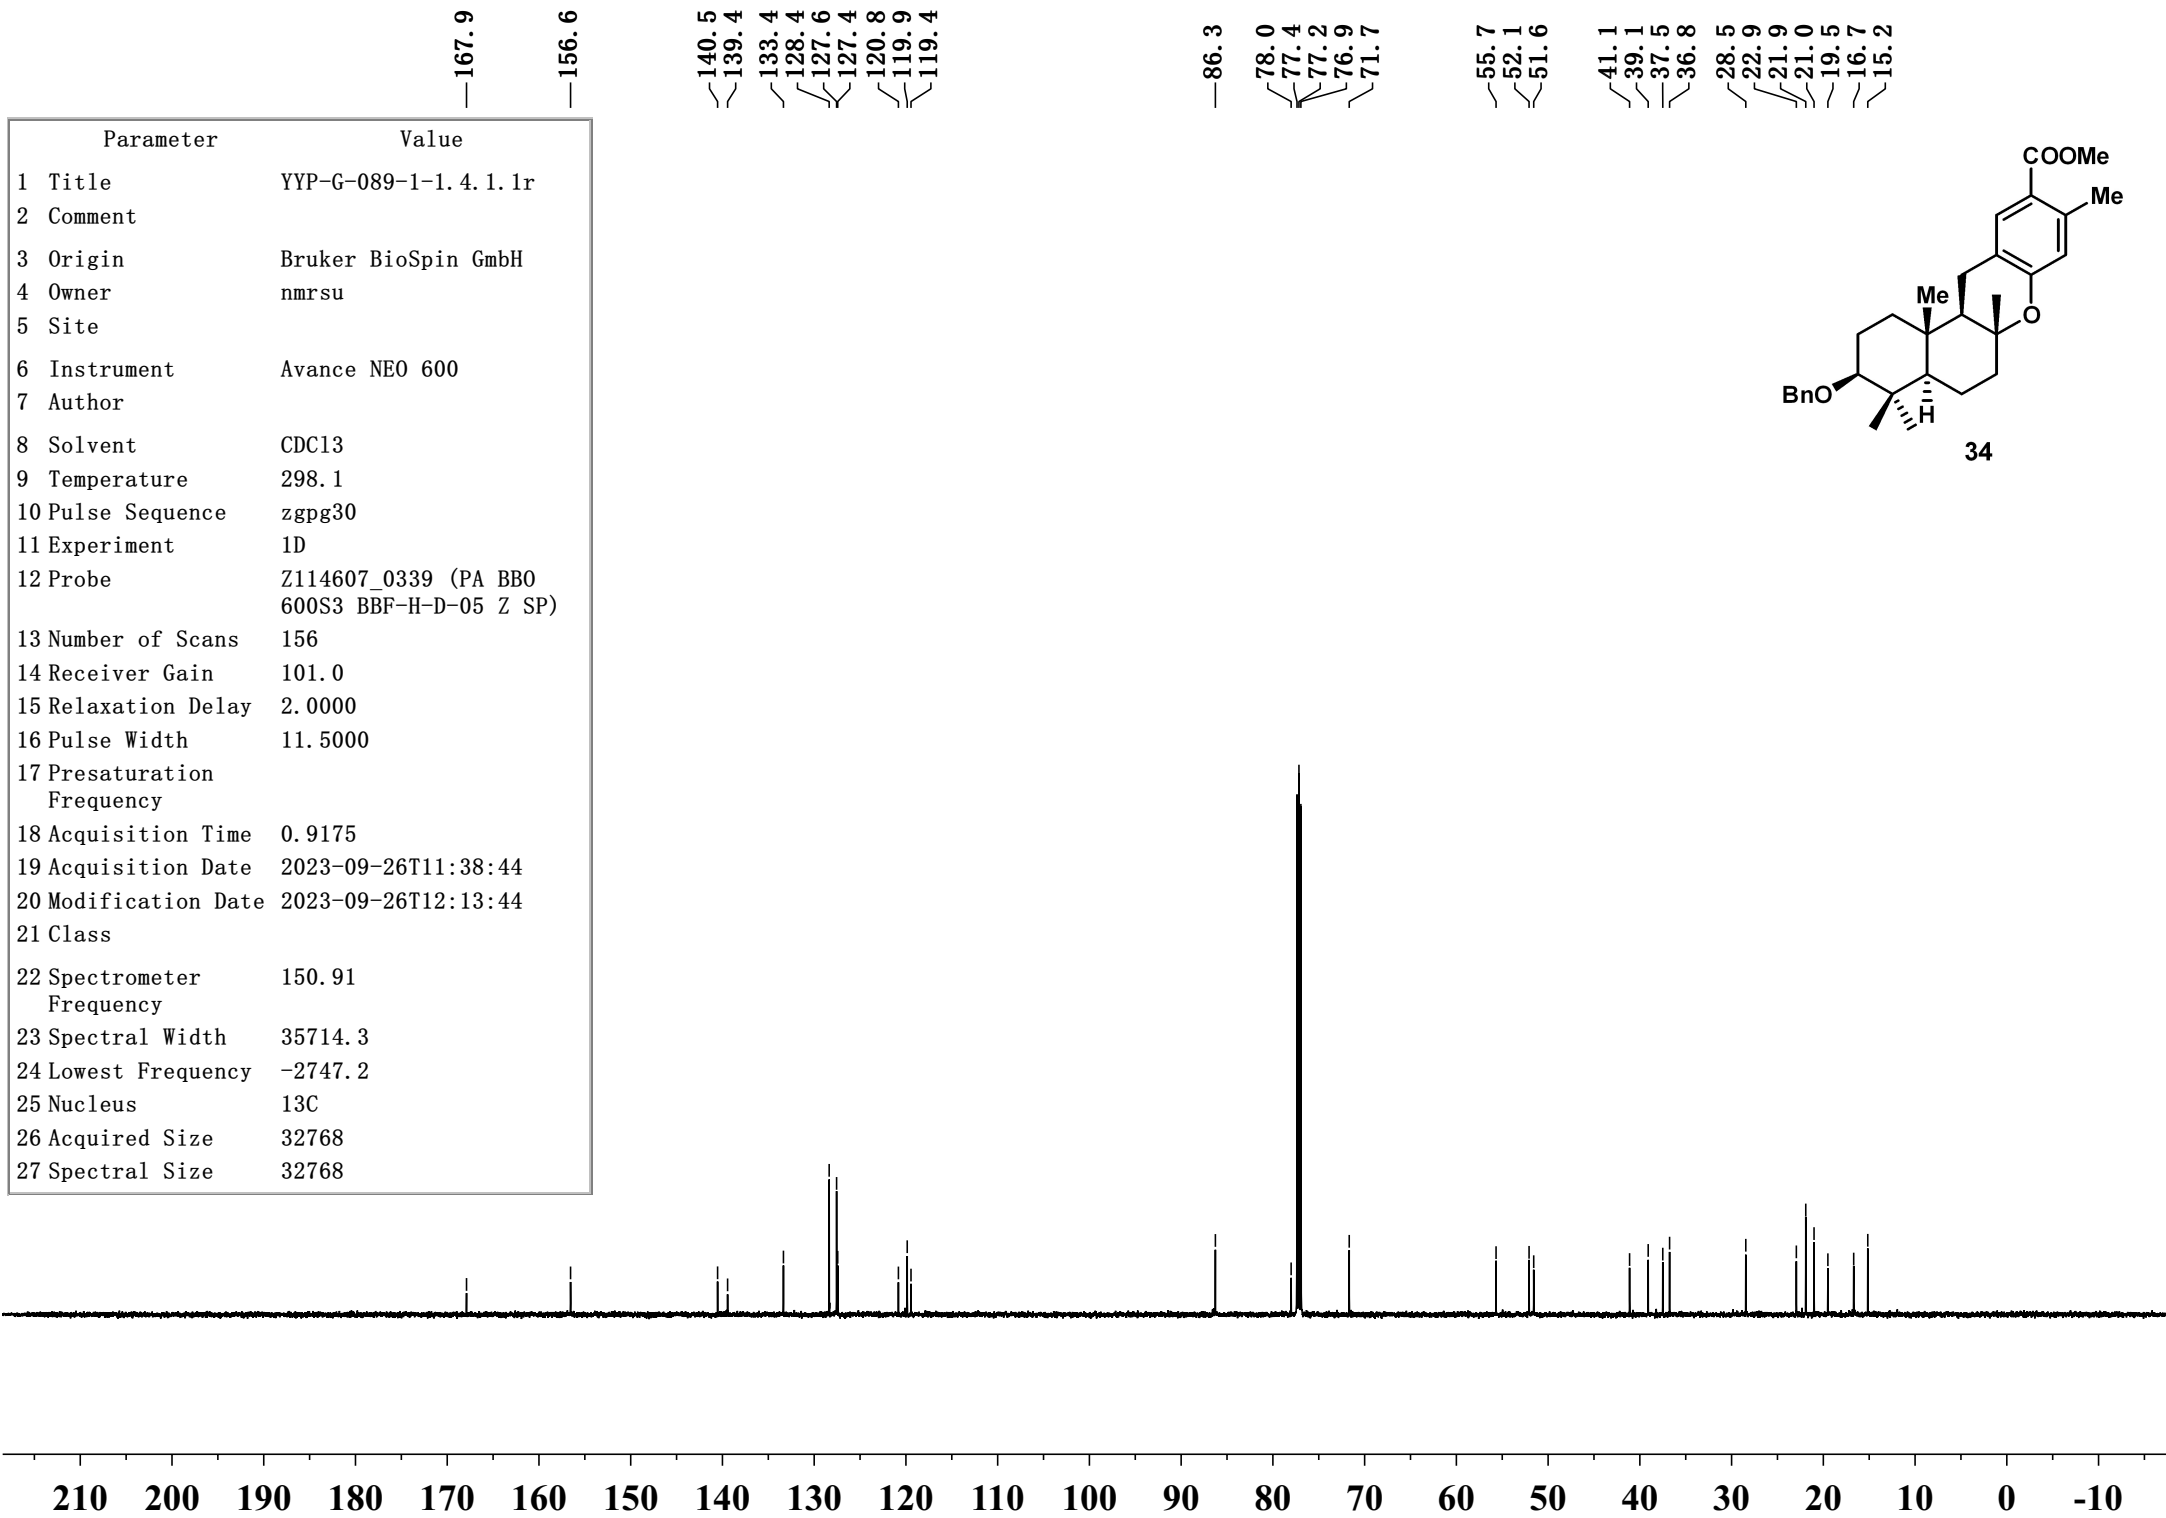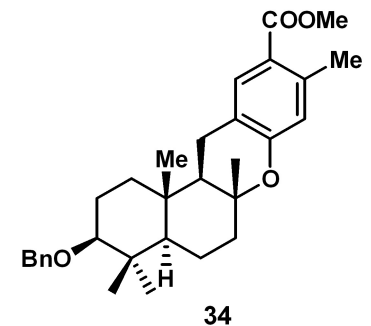

| Parameter                     | Value                                          |
|-------------------------------|------------------------------------------------|
| 1 Title                       | YYP-G-090-2-1.10.1.1r                          |
| 2 Comment                     |                                                |
| 3 Origin                      | Bruker BioSpin GmbH                            |
| 4 Owner                       | nmrsu                                          |
| 5 Site                        |                                                |
| 6 Instrument                  | Avance Neo 400M                                |
| 7 Author                      |                                                |
| 8 Solvent                     | CDC13                                          |
| 9 Temperature                 | 295.2                                          |
| 10 Pulse Sequence             | zg30                                           |
| 11 Experiment                 | 1D                                             |
| 12 Probe                      | Z116098_0913 (PA BBO<br>400S1 BBF-H-D-05 Z SP) |
| 13 Number of Scans            | 16                                             |
| 14 Receiver Gain              | 101.0                                          |
| 15 Relaxation Delay           | 1.0000                                         |
| 16 Pulse Width                | 10.0000                                        |
| 17 Presaturation<br>Frequency |                                                |
| 18 Acquisition Time           | 3.9977                                         |
| 19 Acquisition Date           | 2023-10-13T12:16:23                            |
| 20 Modification Date          | 2023-10-13T14:47:08                            |
| 21 Class                      |                                                |
| 22 Spectrometer<br>Frequency  | 400.18                                         |
| 23 Spectral Width             | 8196.7                                         |
| 24 Lowest Frequency           | -1636.8                                        |
| 25 Nucleus                    | 1H                                             |
| 26 Acquired Size              | 32768                                          |
| 27 Spectral Size              | 65536                                          |

7.86  
7.38  
7.37  
7.36  
7.35  
7.34  
7.33  
7.32  
7.32  
7.29  
7.28  
7.28  
7.27  
7.26  
7.25  
6.63  
4.70  
4.67  
4.46  
4.43  
2.98  
2.97  
2.95  
2.94  
2.64  
2.62  
2.61  
2.56  
2.12  
2.08  
1.91  
1.89  
1.88  
1.80  
1.80  
1.77  
1.76  
1.68  
1.67  
1.65  
1.62  
1.59  
1.58  
1.57  
1.56  
1.54  
1.45  
1.45  
1.45  
1.42  
1.41  
1.21  
1.07  
1.07  
1.04  
1.02  
1.00  
0.99  
0.92  
0.88

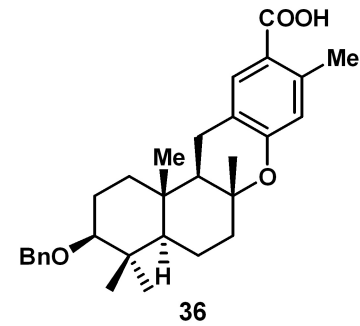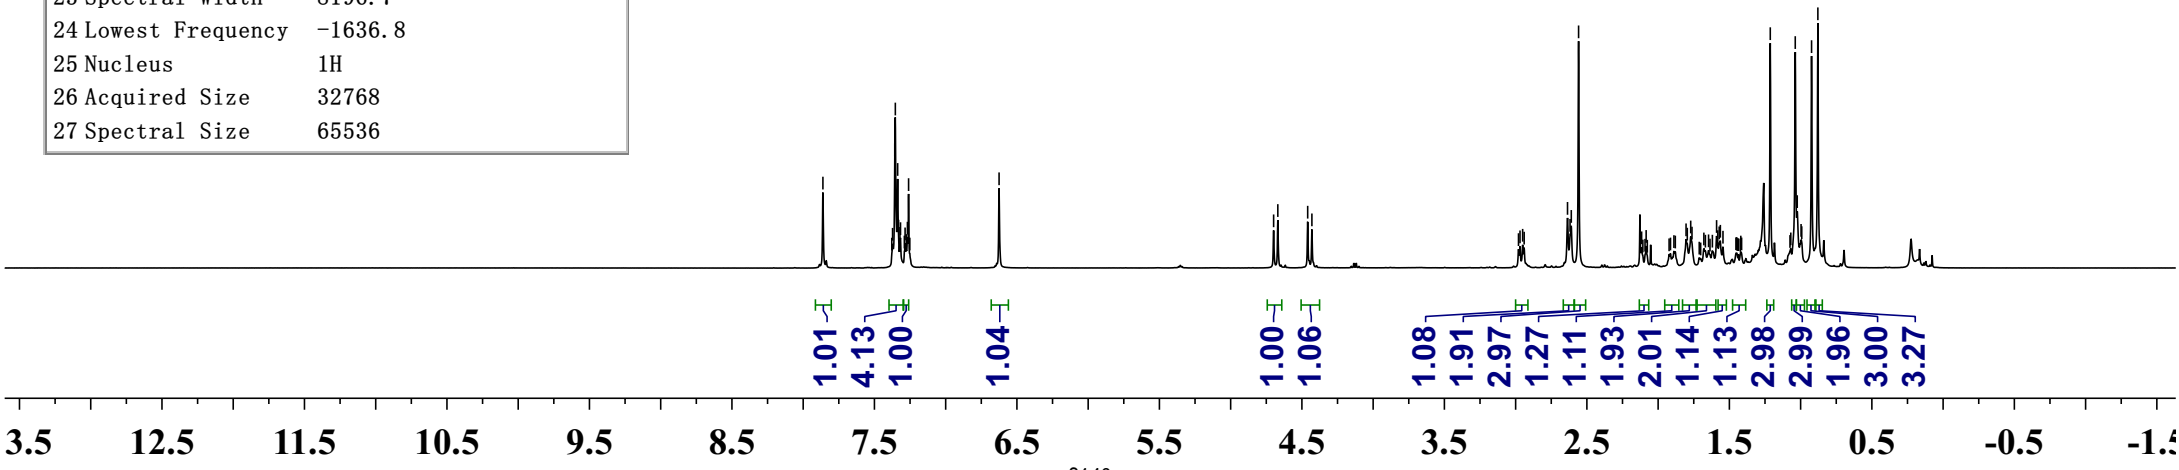



| Parameter                     | Value                                          |
|-------------------------------|------------------------------------------------|
| 1 Title                       | YYP-G-090-2-1.11.1.1r                          |
| 2 Comment                     |                                                |
| 3 Origin                      | Bruker BioSpin GmbH                            |
| 4 Owner                       | nmrsu                                          |
| 5 Site                        |                                                |
| 6 Instrument                  | Avance Neo 400M                                |
| 7 Author                      |                                                |
| 8 Solvent                     | CDC13                                          |
| 9 Temperature                 | 295.4                                          |
| 10 Pulse Sequence             | zgpg30                                         |
| 11 Experiment                 | 1D                                             |
| 12 Probe                      | Z116098_0913 (PA BBO<br>400S1 BBF-H-D-05 Z SP) |
| 13 Number of Scans            | 300                                            |
| 14 Receiver Gain              | 101.0                                          |
| 15 Relaxation Delay           | 2.0000                                         |
| 16 Pulse Width                | 10.0000                                        |
| 17 Presaturation<br>Frequency |                                                |
| 18 Acquisition Time           | 1.3763                                         |
| 19 Acquisition Date           | 2023-10-13T12:35:08                            |
| 20 Modification Date          | 2023-10-13T14:47:09                            |
| 21 Class                      |                                                |
| 22 Spectrometer<br>Frequency  | 100.63                                         |
| 23 Spectral Width             | 23809.5                                        |
| 24 Lowest Frequency           | -1831.2                                        |
| 25 Nucleus                    | 13C                                            |
| 26 Acquired Size              | 32768                                          |
| 27 Spectral Size              | 32768                                          |

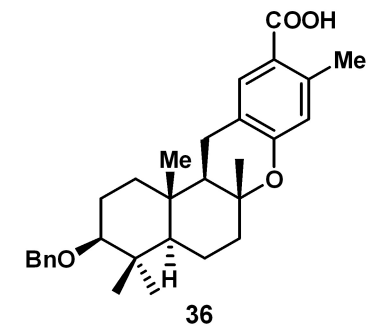

—172.8 —157.4 —141.7 —139.4 —134.5 —128.4 —127.6 —127.4 —120.0 —119.6 —119.6 —86.2 —78.2 —77.5 —77.2 —76.8 —71.7 —55.6 —52.0 —41.1 —39.1 —37.5 —36.8 —28.4 —22.9 —22.3 —21.9 —21.1 —19.5 —16.7 —15.2

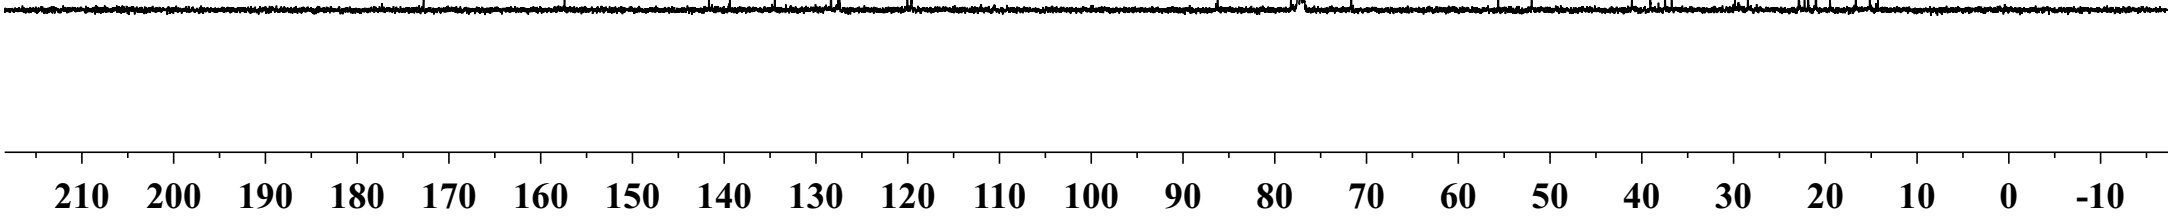

11.85  
7.37  
7.37  
7.36  
7.36  
7.35  
7.34  
7.34  
7.33  
7.32  
7.32  
7.28  
7.28  
7.28  
7.27  
7.27  
7.26  
7.26  
6.21  
4.70  
4.68  
4.45  
4.43  
2.98  
2.97  
2.96  
2.95  
2.69  
2.68  
2.66  
2.66  
2.52  
2.33  
2.31  
2.31  
2.28  
2.28  
2.10  
2.09  
2.08  
2.08  
1.92  
1.91  
1.90  
1.90  
1.89  
1.89  
1.88  
1.88  
1.79  
1.79  
1.77  
1.77  
1.67  
1.66  
1.64  
1.64  
1.62  
1.62  
1.62  
1.60  
1.60  
1.52  
1.51  
1.50  
1.49  
1.45  
1.45  
1.45  
1.43  
1.21  
1.06  
1.06  
1.05  
1.04  
1.02  
1.02  
1.02  
1.02  
1.00  
1.00  
0.95  
0.88

| Parameter                     | Value                                          |
|-------------------------------|------------------------------------------------|
| 1 Title                       | YYP-G-093-3-2.10.1.1r                          |
| 2 Comment                     |                                                |
| 3 Origin                      | Bruker BioSpin GmbH                            |
| 4 Owner                       | nmrsu                                          |
| 5 Site                        |                                                |
| 6 Instrument                  | Avance NEO 600                                 |
| 7 Author                      |                                                |
| 8 Solvent                     | CDC13                                          |
| 9 Temperature                 | 298.1                                          |
| 10 Pulse Sequence             | zg30                                           |
| 11 Experiment                 | 1D                                             |
| 12 Probe                      | Z114607_0339 (PA BBO<br>600S3 BBF-H-D-05 Z SP) |
| 13 Number of Scans            | 8                                              |
| 14 Receiver Gain              | 71.8                                           |
| 15 Relaxation Delay           | 1.0000                                         |
| 16 Pulse Width                | 10.0000                                        |
| 17 Presaturation<br>Frequency |                                                |
| 18 Acquisition Time           | 2.7525                                         |
| 19 Acquisition Date           | 2023-11-08T22:07:04                            |
| 20 Modification Date          | 2023-11-09T09:09:16                            |
| 21 Class                      |                                                |
| 22 Spectrometer<br>Frequency  | 600.15                                         |
| 23 Spectral Width             | 11904.8                                        |
| 24 Lowest Frequency           | -2260.8                                        |
| 25 Nucleus                    | 1H                                             |
| 26 Acquired Size              | 32768                                          |
| 27 Spectral Size              | 65536                                          |

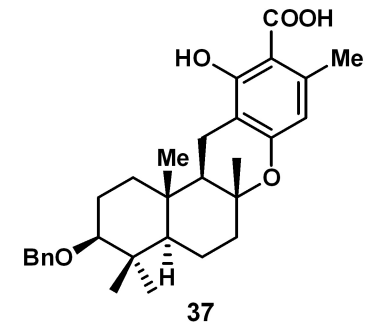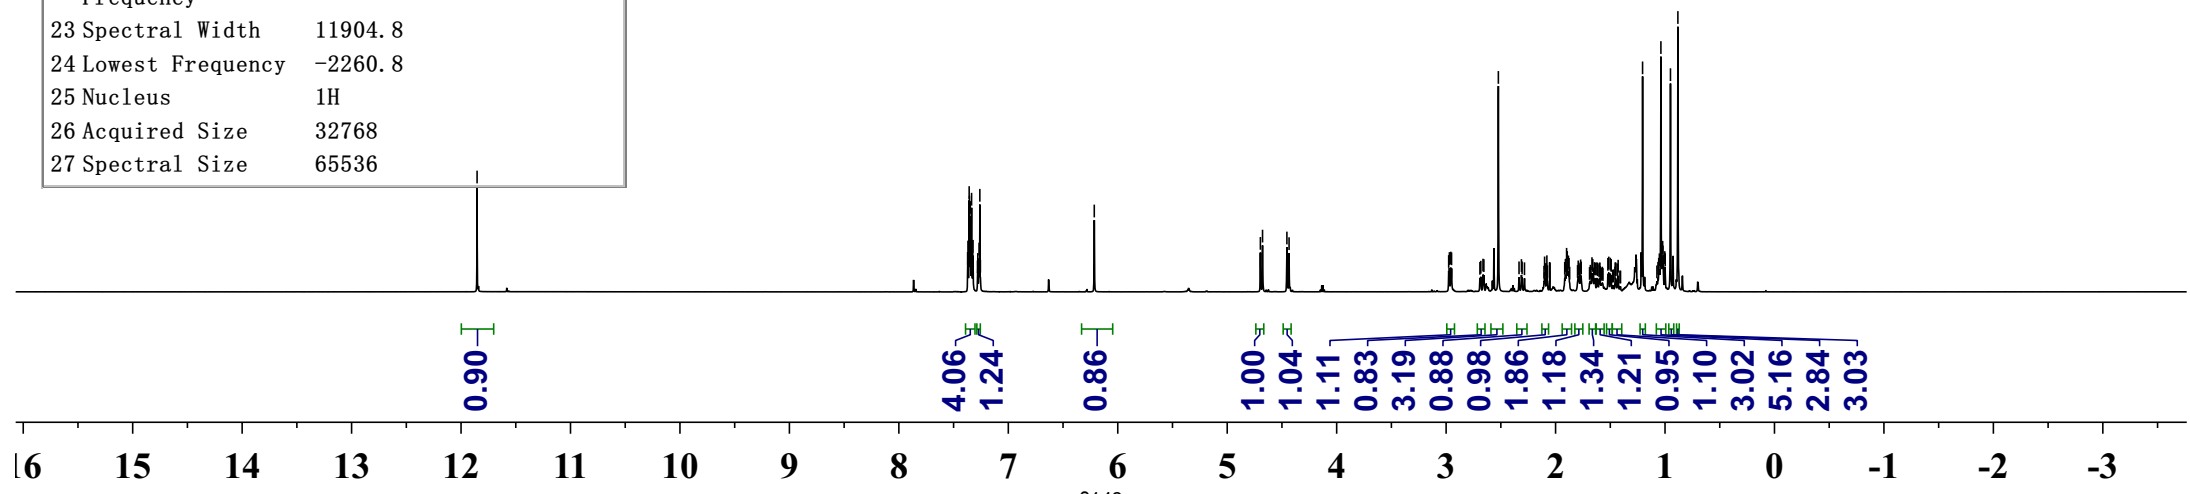

| Parameter                     | Value                                          |
|-------------------------------|------------------------------------------------|
| 1 Title                       | YYP-G-093-3-2.11.1.1r                          |
| 2 Comment                     |                                                |
| 3 Origin                      | Bruker BioSpin GmbH                            |
| 4 Owner                       | nmrsu                                          |
| 5 Site                        |                                                |
| 6 Instrument                  | Avance NEO 600                                 |
| 7 Author                      |                                                |
| 8 Solvent                     | CDC13                                          |
| 9 Temperature                 | 298.1                                          |
| 10 Pulse Sequence             | zgpg30                                         |
| 11 Experiment                 | 1D                                             |
| 12 Probe                      | Z114607_0339 (PA BBO<br>600S3 BBF-H-D-05 Z SP) |
| 13 Number of Scans            | 200                                            |
| 14 Receiver Gain              | 101.0                                          |
| 15 Relaxation Delay           | 2.0000                                         |
| 16 Pulse Width                | 11.5000                                        |
| 17 Presaturation<br>Frequency |                                                |
| 18 Acquisition Time           | 0.9175                                         |
| 19 Acquisition Date           | 2023-11-08T22:17:43                            |
| 20 Modification Date          | 2023-11-09T09:09:16                            |
| 21 Class                      |                                                |
| 22 Spectrometer<br>Frequency  | 150.91                                         |
| 23 Spectral Width             | 35714.3                                        |
| 24 Lowest Frequency           | -2747.3                                        |
| 25 Nucleus                    | <sup>13</sup> C                                |
| 26 Acquired Size              | 32768                                          |
| 27 Spectral Size              | 32768                                          |

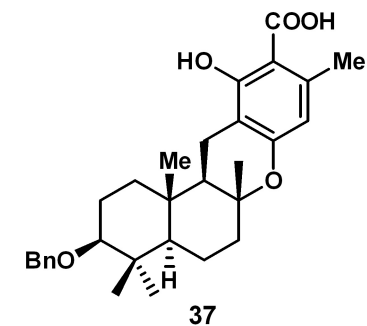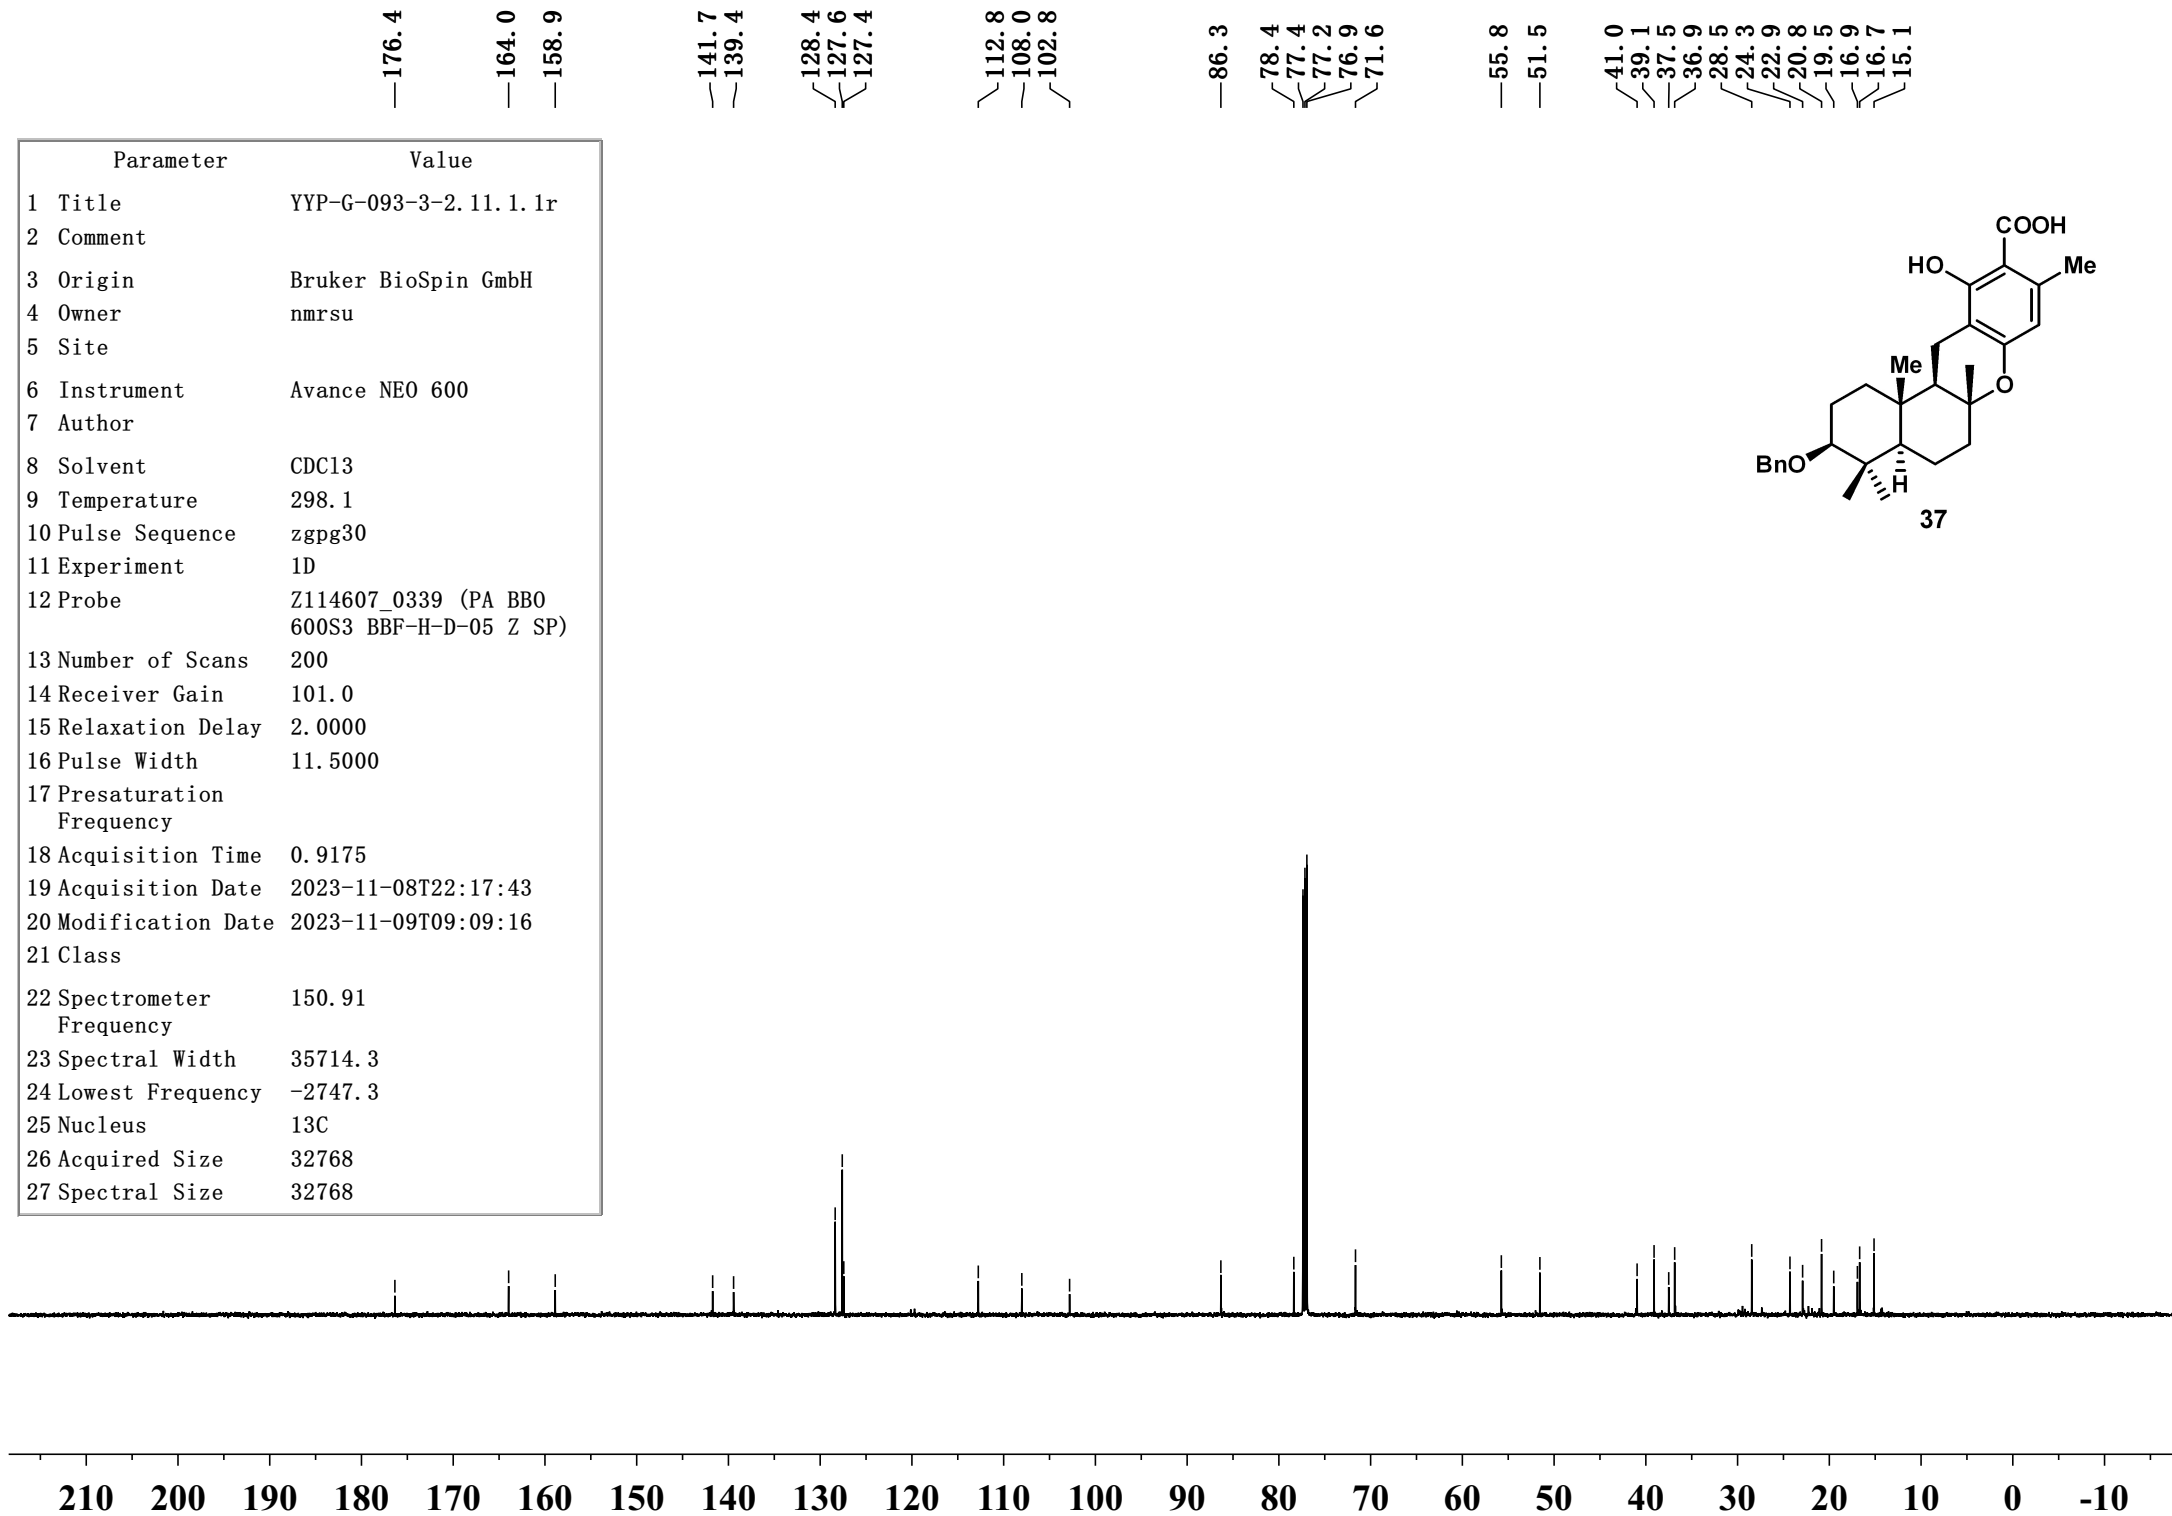

7.26  
-6.57  
-4.52  
-4.51  
-4.50  
-4.49  
-2.50  
-2.49  
-2.48  
-2.46  
-2.45  
-2.43  
-2.30  
-2.28  
-2.28  
-2.27  
-2.26  
-2.26  
-2.25  
-2.23  
-2.22  
-2.06  
-2.04  
-2.03  
-2.01  
-2.00  
-1.78  
-1.78  
-1.76  
-1.76  
-1.75  
-1.75  
-1.74  
-1.73  
-1.72  
-1.71  
-1.71  
-1.70  
-1.70  
-1.69  
-1.68  
-1.67  
-1.67  
-1.65  
-1.65  
-1.65  
-1.64  
-1.63  
-1.63  
-1.56  
-1.55  
-1.54  
-1.53  
-1.47  
-1.46  
-1.44  
-1.44  
-1.42  
-1.42  
-1.41  
-1.40  
-1.39  
-1.18  
-1.18  
-1.17  
-1.16  
-1.15  
-1.15  
-1.10  
-1.10  
-1.10  
-1.08  
-1.08  
-0.91  
-0.91  
0.89

| Parameter                     | Value                                          |
|-------------------------------|------------------------------------------------|
| 1 Title                       | YYP-G-110-1-4.10.1.1r                          |
| 2 Comment                     |                                                |
| 3 Origin                      | Bruker BioSpin GmbH                            |
| 4 Owner                       | nmrsu                                          |
| 5 Site                        |                                                |
| 6 Instrument                  | Avance NEO 600                                 |
| 7 Author                      |                                                |
| 8 Solvent                     | CDC13                                          |
| 9 Temperature                 | 298.1                                          |
| 10 Pulse Sequence             | zg30                                           |
| 11 Experiment                 | 1D                                             |
| 12 Probe                      | Z114607_0339 (PA BBO<br>600S3 BBF-H-D-05 Z SP) |
| 13 Number of Scans            | 8                                              |
| 14 Receiver Gain              | 101.0                                          |
| 15 Relaxation Delay           | 1.0000                                         |
| 16 Pulse Width                | 10.0000                                        |
| 17 Presaturation<br>Frequency |                                                |
| 18 Acquisition Time           | 2.7525                                         |
| 19 Acquisition Date           | 2023-11-11T16:44:05                            |
| 20 Modification Date          | 2023-11-11T17:12:38                            |
| 21 Class                      |                                                |
| 22 Spectrometer<br>Frequency  | 600.15                                         |
| 23 Spectral Width             | 11904.8                                        |
| 24 Lowest Frequency           | -2261.0                                        |
| 25 Nucleus                    | 1H                                             |
| 26 Acquired Size              | 32768                                          |
| 27 Spectral Size              | 65536                                          |

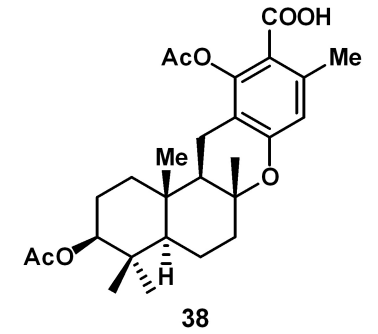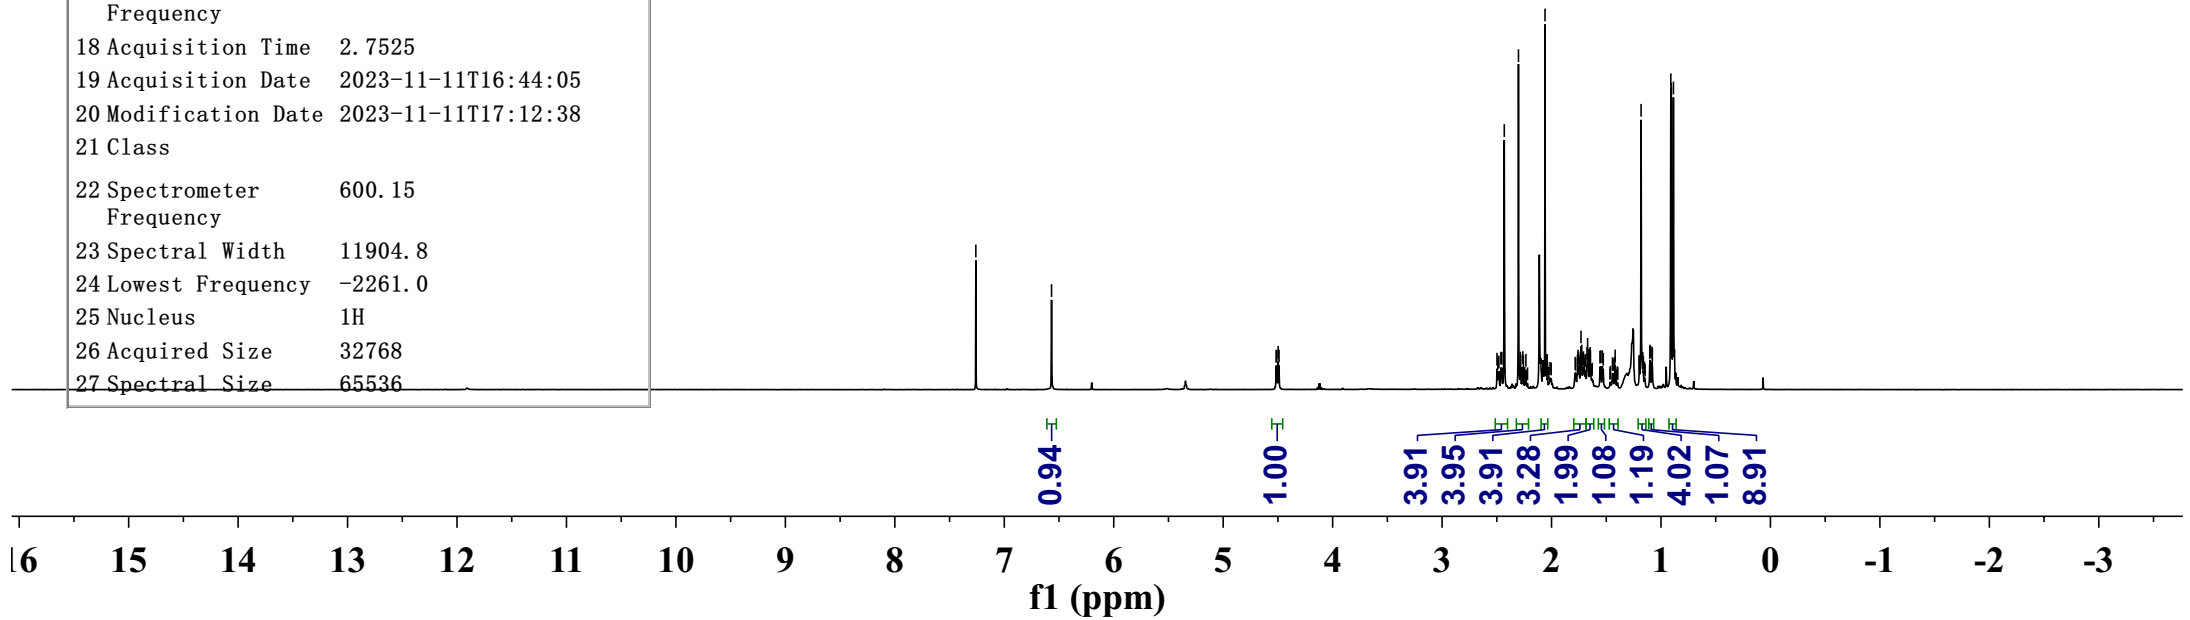

| Parameter                     | Value                                             |
|-------------------------------|---------------------------------------------------|
| 1 Title                       | YYP-G-110-1-4.11.1.1r                             |
| 2 Comment                     |                                                   |
| 3 Origin                      | Bruker BioSpin GmbH                               |
| 4 Owner                       | nmrstu                                            |
| 5 Site                        |                                                   |
| 6 Instrument                  | Avance NEO 600                                    |
| 7 Author                      |                                                   |
| 8 Solvent                     | CDC13                                             |
| 9 Temperature                 | 298.1                                             |
| 10 Pulse Sequence             | zgpg30                                            |
| 11 Experiment                 | 1D                                                |
| 12 Probe                      | Z114607_0339 (PA BBO<br>600S3 BBF-H-D-05 Z<br>SP) |
| 13 Number of Scans            | 500                                               |
| 14 Receiver Gain              | 101.0                                             |
| 15 Relaxation Delay           | 2.0000                                            |
| 16 Pulse Width                | 11.5000                                           |
| 17 Presaturation<br>Frequency |                                                   |
| 18 Acquisition Time           | 0.9175                                            |
| 19 Class                      |                                                   |
| 20 Spectrometer<br>Frequency  | 150.91                                            |
| 21 Spectral Width             | 35714.3                                           |
| 22 Lowest Frequency           | -2746.4                                           |
| 23 Nucleus                    | 13C                                               |
| 24 Acquired Size              | 32768                                             |
| 25 Spectral Size              | 32768                                             |

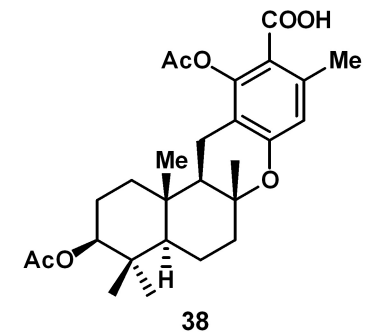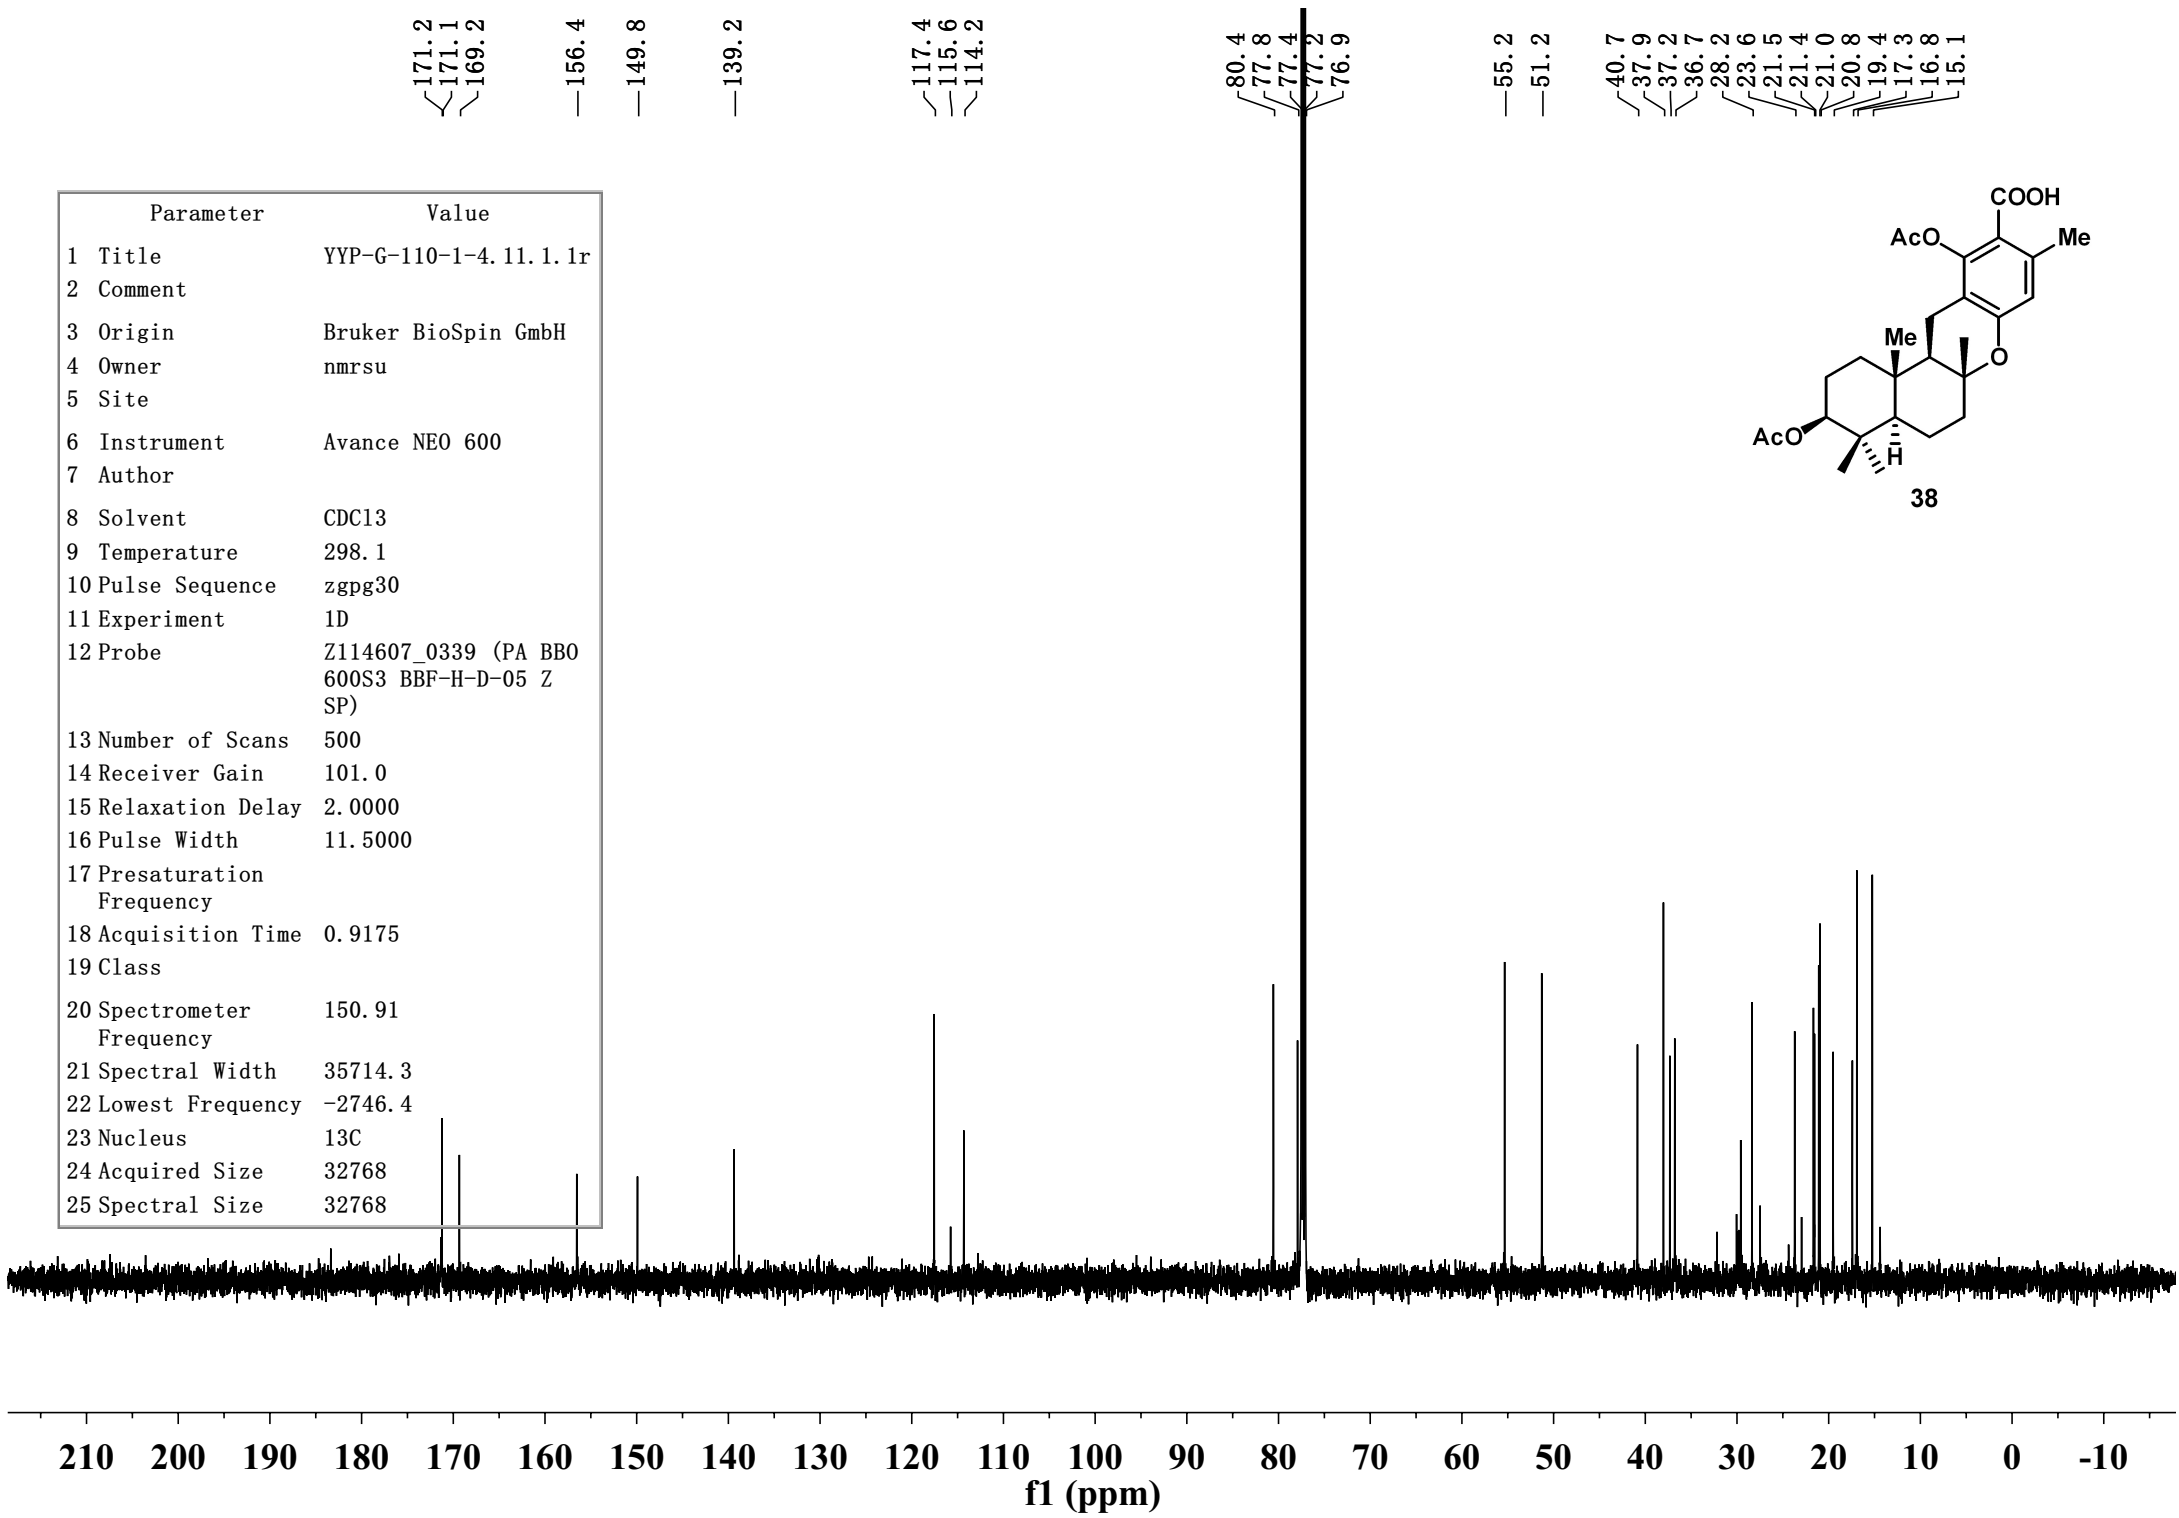

| Parameter                     | Value                                             |
|-------------------------------|---------------------------------------------------|
| 1 Title                       | YYP-G-112-1-1.1.1.1r                              |
| 2 Comment                     |                                                   |
| 3 Origin                      | Bruker BioSpin GmbH                               |
| 4 Owner                       | nmrsu                                             |
| 5 Site                        |                                                   |
| 6 Instrument                  | AVANCE NEO 400 MHZ<br>DIGITAL NMR<br>SPECTROMETER |
| 7 Author                      |                                                   |
| 8 Solvent                     | CDC13                                             |
| 9 Temperature                 | 293.7                                             |
| 10 Pulse Sequence             | zg30                                              |
| 11 Experiment                 | 1D                                                |
| 12 Probe                      | Z116098_0723 (PA BBO<br>400S1 BBF-H-D-05 Z SP)    |
| 13 Number of Scans            | 8                                                 |
| 14 Receiver Gain              | 101.0                                             |
| 15 Relaxation Delay           | 1.0000                                            |
| 16 Pulse Width                | 8.8100                                            |
| 17 Presaturation<br>Frequency |                                                   |
| 18 Acquisition Time           | 3.9977                                            |
| 19 Acquisition Date           | 2023-11-14T18:20:19                               |
| 20 Modification Date          | 2023-11-14T18:39:02                               |
| 21 Class                      |                                                   |
| 22 Spectrometer<br>Frequency  | 400.13                                            |
| 23 Spectral Width             | 8196.7                                            |
| 24 Lowest Frequency           | -1637.2                                           |
| 25 Nucleus                    | 1H                                                |
| 26 Acquired Size              | 32768                                             |
| 27 Spectral Size              | 65536                                             |

6.21  
4.54  
4.52  
4.51  
4.50  
2.69  
2.68  
2.65  
2.63  
2.51  
2.34  
2.31  
2.30  
2.26  
2.12  
2.11  
2.10  
2.09  
2.08  
2.07  
2.05  
2.04  
1.88  
1.87  
1.86  
1.85  
1.84  
1.83  
1.79  
1.78  
1.77  
1.76  
1.75  
1.74  
1.73  
1.72  
1.70  
1.68  
1.67  
1.67  
1.66  
1.64  
1.55  
1.54  
1.52  
1.50  
1.46  
1.46  
1.46  
1.20  
1.19  
1.16  
1.15  
1.15  
1.12  
1.11  
1.09  
1.08  
0.95  
0.91  
0.89

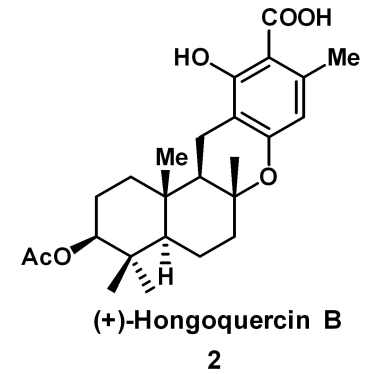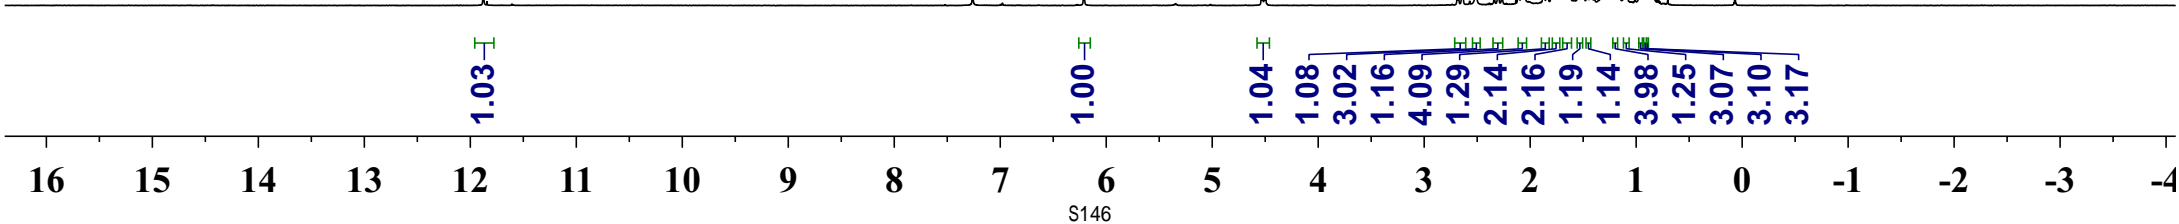

| Parameter                     | Value                                          |
|-------------------------------|------------------------------------------------|
| 1 Title                       | YYP-G-112-1-1.23.1.1r                          |
| 2 Comment                     |                                                |
| 3 Origin                      | Bruker BioSpin GmbH                            |
| 4 Owner                       | nmrsu                                          |
| 5 Site                        |                                                |
| 6 Instrument                  | Avance NEO 600                                 |
| 7 Author                      |                                                |
| 8 Solvent                     | CDC13                                          |
| 9 Temperature                 | 298.1                                          |
| 10 Pulse Sequence             | zgpg30                                         |
| 11 Experiment                 | 1D                                             |
| 12 Probe                      | Z114607_0339 (PA BBO<br>600S3 BBF-H-D-05 Z SP) |
| 13 Number of Scans            | 7500                                           |
| 14 Receiver Gain              | 101.0                                          |
| 15 Relaxation Delay           | 2.0000                                         |
| 16 Pulse Width                | 11.5000                                        |
| 17 Presaturation<br>Frequency |                                                |
| 18 Acquisition Time           | 0.9175                                         |
| 19 Acquisition Date           | 2023-11-16T05:08:57                            |
| 20 Modification Date          | 2023-11-16T09:27:54                            |
| 21 Class                      |                                                |
| 22 Spectrometer<br>Frequency  | 150.91                                         |
| 23 Spectral Width             | 35714.3                                        |
| 24 Lowest Frequency           | -2921.0                                        |
| 25 Nucleus                    | 13C                                            |
| 26 Acquired Size              | 32768                                          |
| 27 Spectral Size              | 32768                                          |

—175.7 —171.2 —164.0 —158.8 —141.7  
 —112.7 —107.9 —102.8  
 —80.6 —78.1 —77.4 —77.2 —77.0  
 —55.3 —51.4  
 —40.8 —37.9 —37.3 —36.8 —28.3 —24.3 —23.7 —21.4 —20.8 —19.5 —16.9 —16.8 —15.2

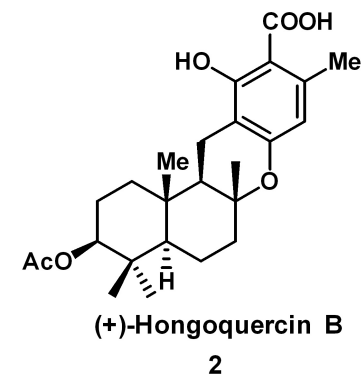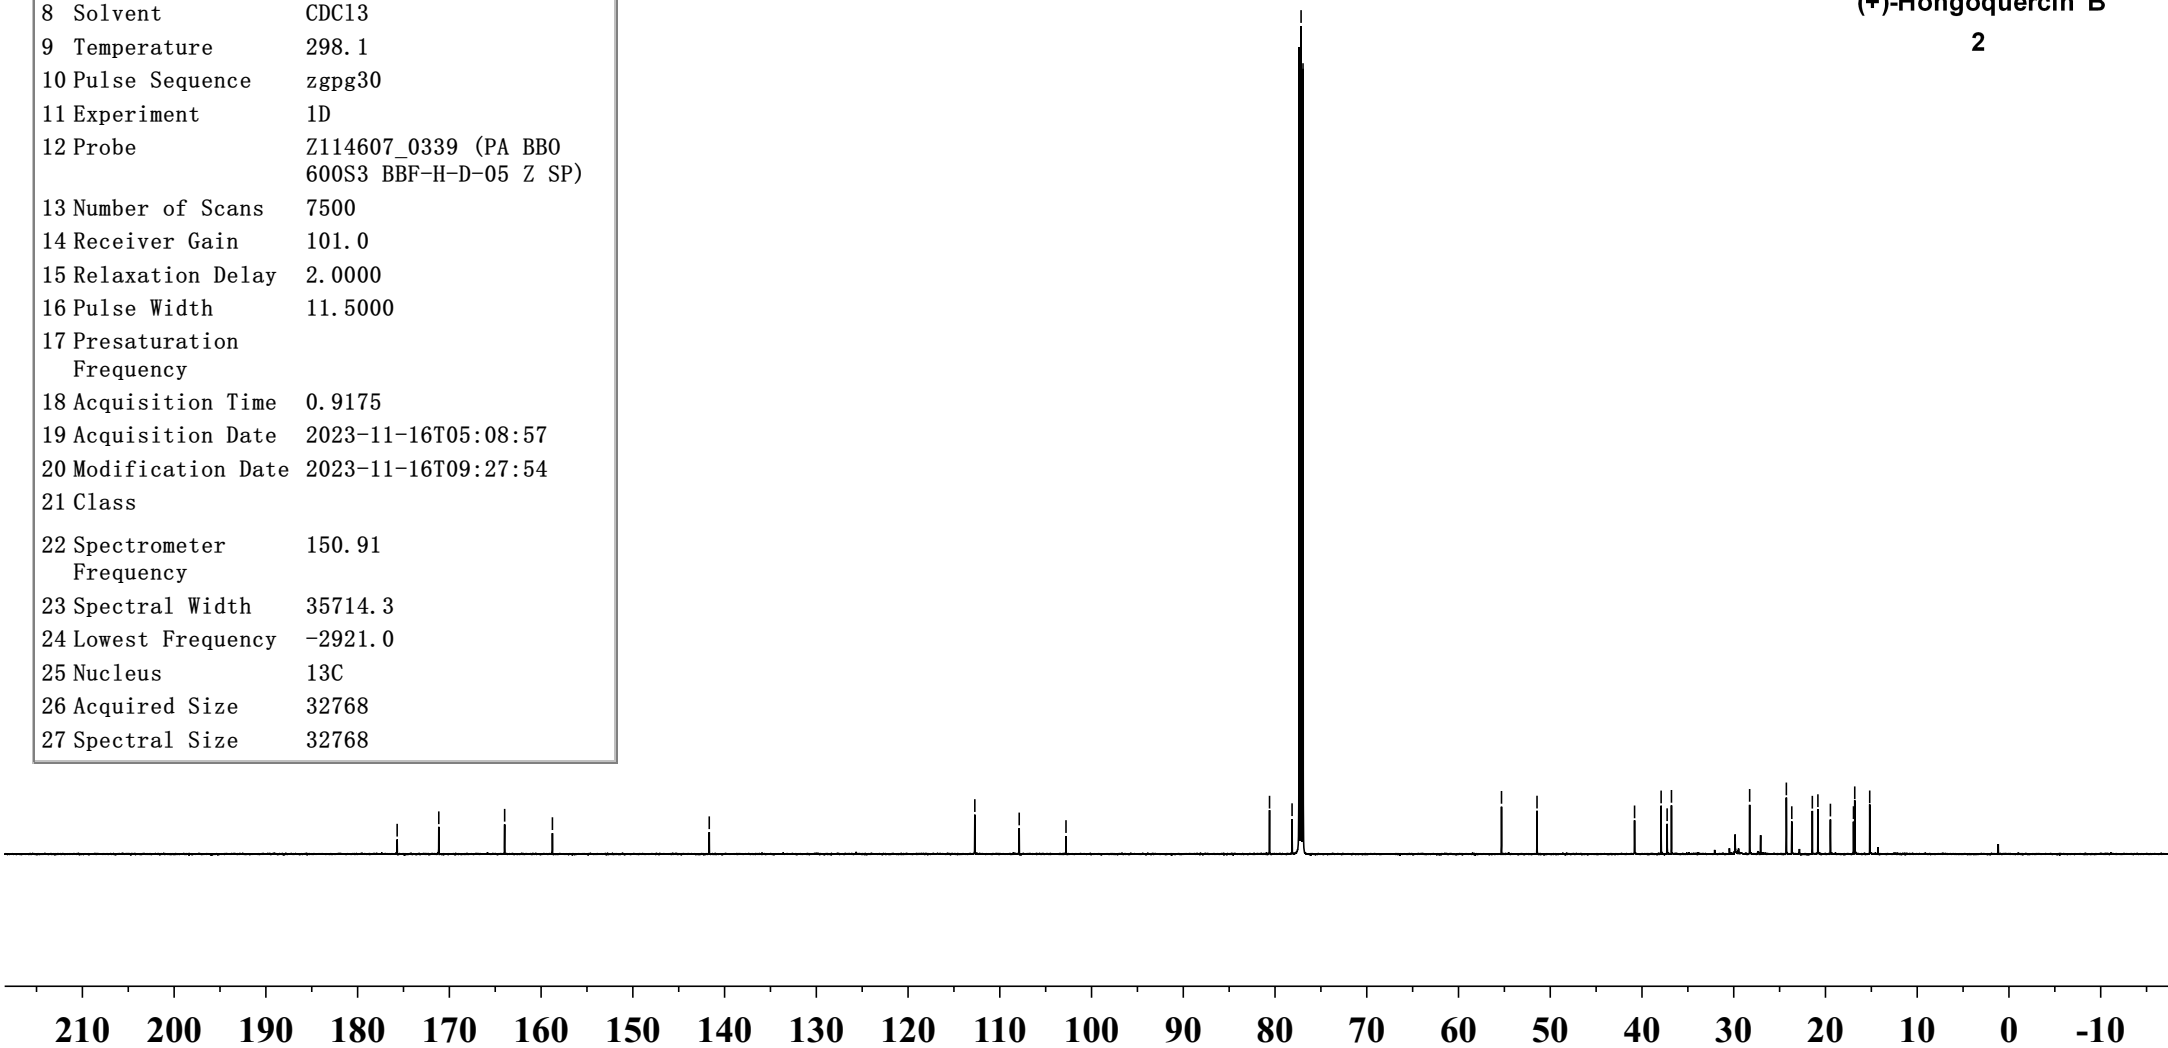

| Parameter                     | Value                                          |
|-------------------------------|------------------------------------------------|
| 1 Title                       | YYP-G-119-1-1.10.1.1r                          |
| 2 Comment                     |                                                |
| 3 Origin                      | Bruker BioSpin GmbH                            |
| 4 Owner                       | nmrsu                                          |
| 5 Site                        |                                                |
| 6 Instrument                  | Avance NEO 600                                 |
| 7 Author                      |                                                |
| 8 Solvent                     | CDCl3                                          |
| 9 Temperature                 | 298.1                                          |
| 10 Pulse Sequence             | zg30                                           |
| 11 Experiment                 | 1D                                             |
| 12 Probe                      | Z114607_0339 (PA BBO<br>600S3 BBF-H-D-05 Z SP) |
| 13 Number of Scans            | 8                                              |
| 14 Receiver Gain              | 90.5                                           |
| 15 Relaxation Delay           | 1.0000                                         |
| 16 Pulse Width                | 10.0000                                        |
| 17 Presaturation<br>Frequency |                                                |
| 18 Acquisition Time           | 2.7525                                         |
| 19 Acquisition Date           | 2023-11-28T11:45:02                            |
| 20 Modification Date          | 2023-11-28T12:14:41                            |
| 21 Class                      |                                                |
| 22 Spectrometer<br>Frequency  | 600.15                                         |
| 23 Spectral Width             | 11904.8                                        |
| 24 Lowest Frequency           | -2260.9                                        |
| 25 Nucleus                    | 1H                                             |
| 26 Acquired Size              | 32768                                          |
| 27 Spectral Size              | 65536                                          |

—7.26

5.67 5.67 5.66 5.66 4.83 4.79 2.13 1.88 1.88 1.86 1.86 1.80 1.80 1.79 1.64 1.63 1.62 1.62 1.60 1.60 1.59 1.42 1.42 1.41 1.41 1.41 1.40 1.40 1.39 1.30 1.29 1.28 1.27 1.20 1.19 1.18 1.17 1.15 0.97 0.93 0.86

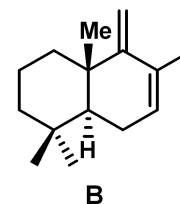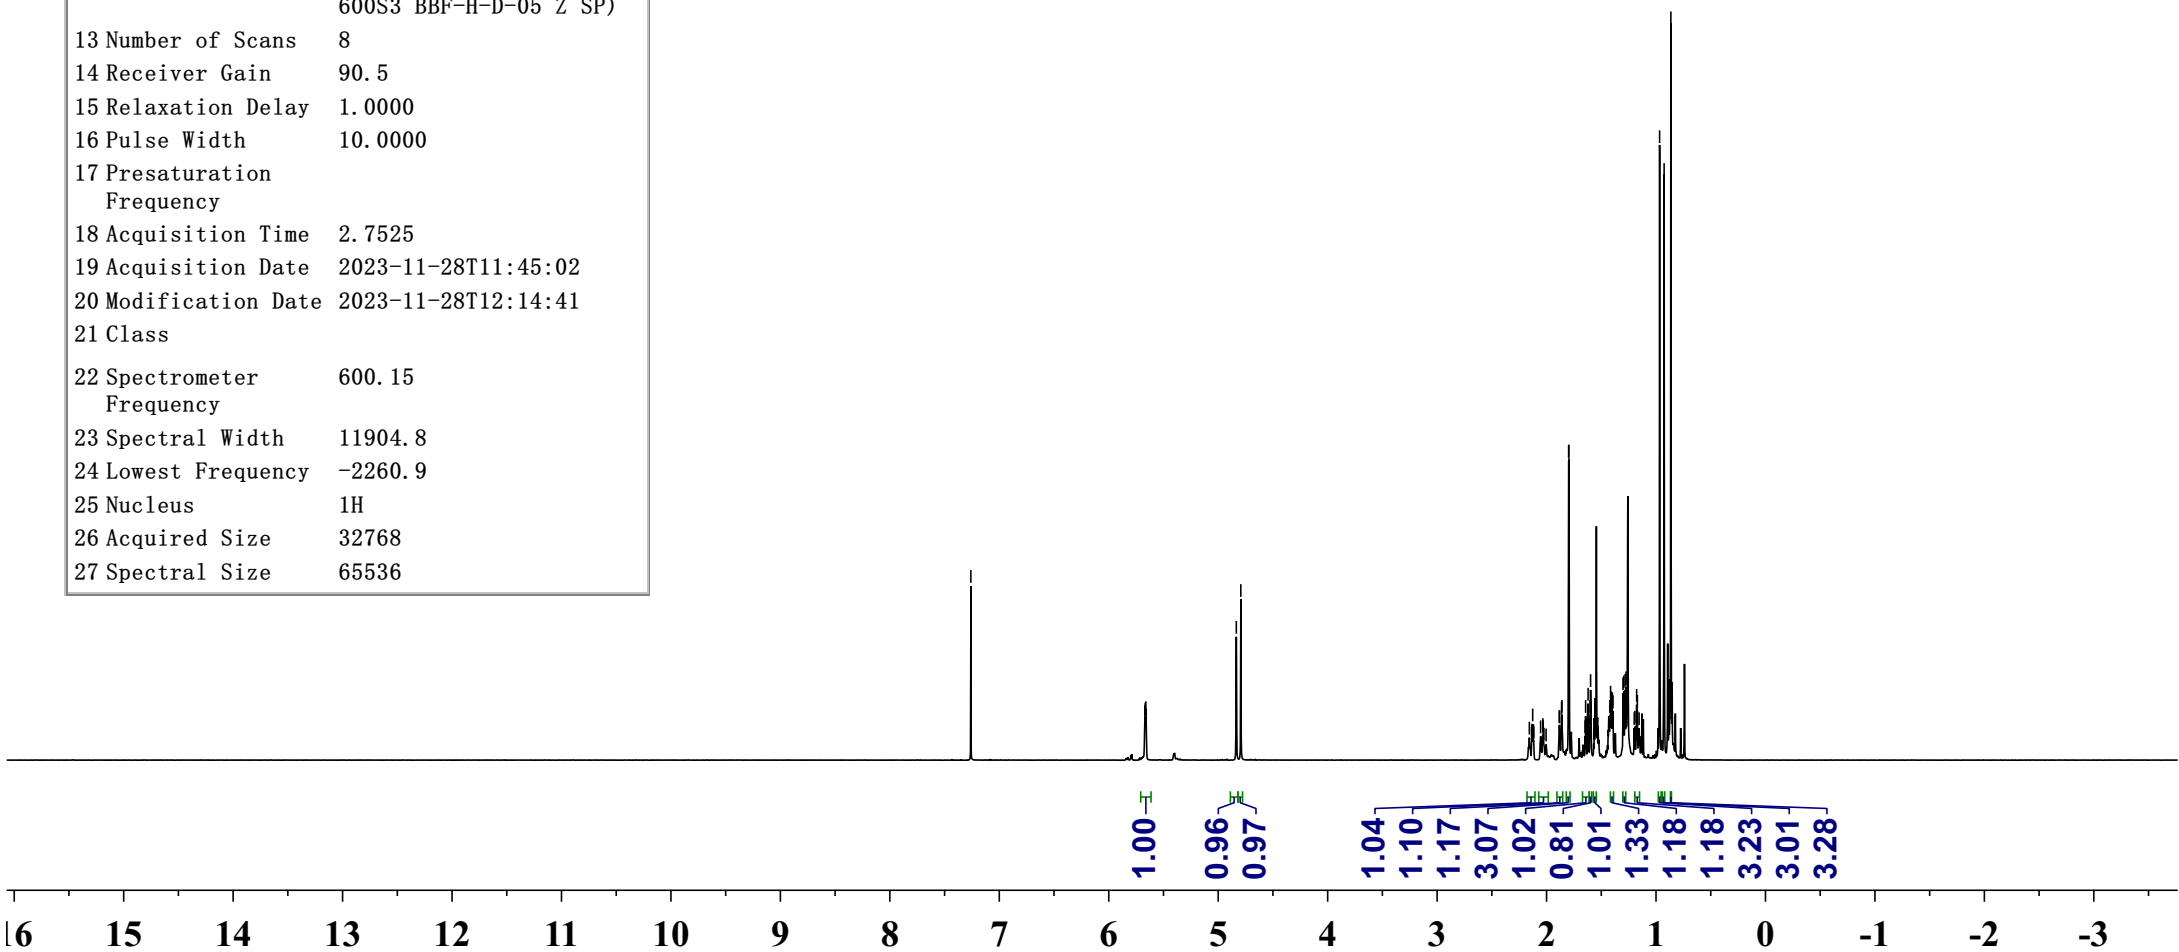



| Parameter                     | Value                                                  |
|-------------------------------|--------------------------------------------------------|
| 1 Title                       | YYP-D-126-2-1.11.1.1r                                  |
| 2 Comment                     |                                                        |
| 3 Origin                      | Bruker BioSpin GmbH                                    |
| 4 Owner                       | nmrsu                                                  |
| 5 Site                        |                                                        |
| 6 Instrument                  | Avance NEO 600                                         |
| 7 Author                      |                                                        |
| 8 Solvent                     | CDC13                                                  |
| 9 Temperature                 | 298.2                                                  |
| 10 Pulse Sequence             | zgpg30                                                 |
| 11 Experiment                 | 1D                                                     |
| 12 Probe                      | Z168773_0027 (CPP1.1<br>BBO 600S3 BB-H&F-D-05 Z<br>XT) |
| 13 Number of Scans            | 44                                                     |
| 14 Receiver Gain              | 101.0                                                  |
| 15 Relaxation Delay           | 2.0000                                                 |
| 16 Pulse Width                | 9.9100                                                 |
| 17 Presaturation<br>Frequency |                                                        |
| 18 Acquisition Time           | 0.9175                                                 |
| 19 Acquisition Date           | 2022-02-15T10:53:06                                    |
| 20 Modification Date          | 2023-12-05T15:13:03                                    |
| 21 Class                      |                                                        |
| 22 Spectrometer<br>Frequency  | 150.91                                                 |
| 23 Spectral Width             | 35714.3                                                |
| 24 Lowest Frequency           | -2745.8                                                |
| 25 Nucleus                    | 13C                                                    |
| 26 Acquired Size              | 32768                                                  |
| 27 Spectral Size              | 32768                                                  |

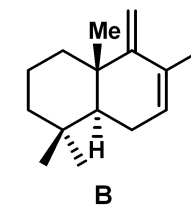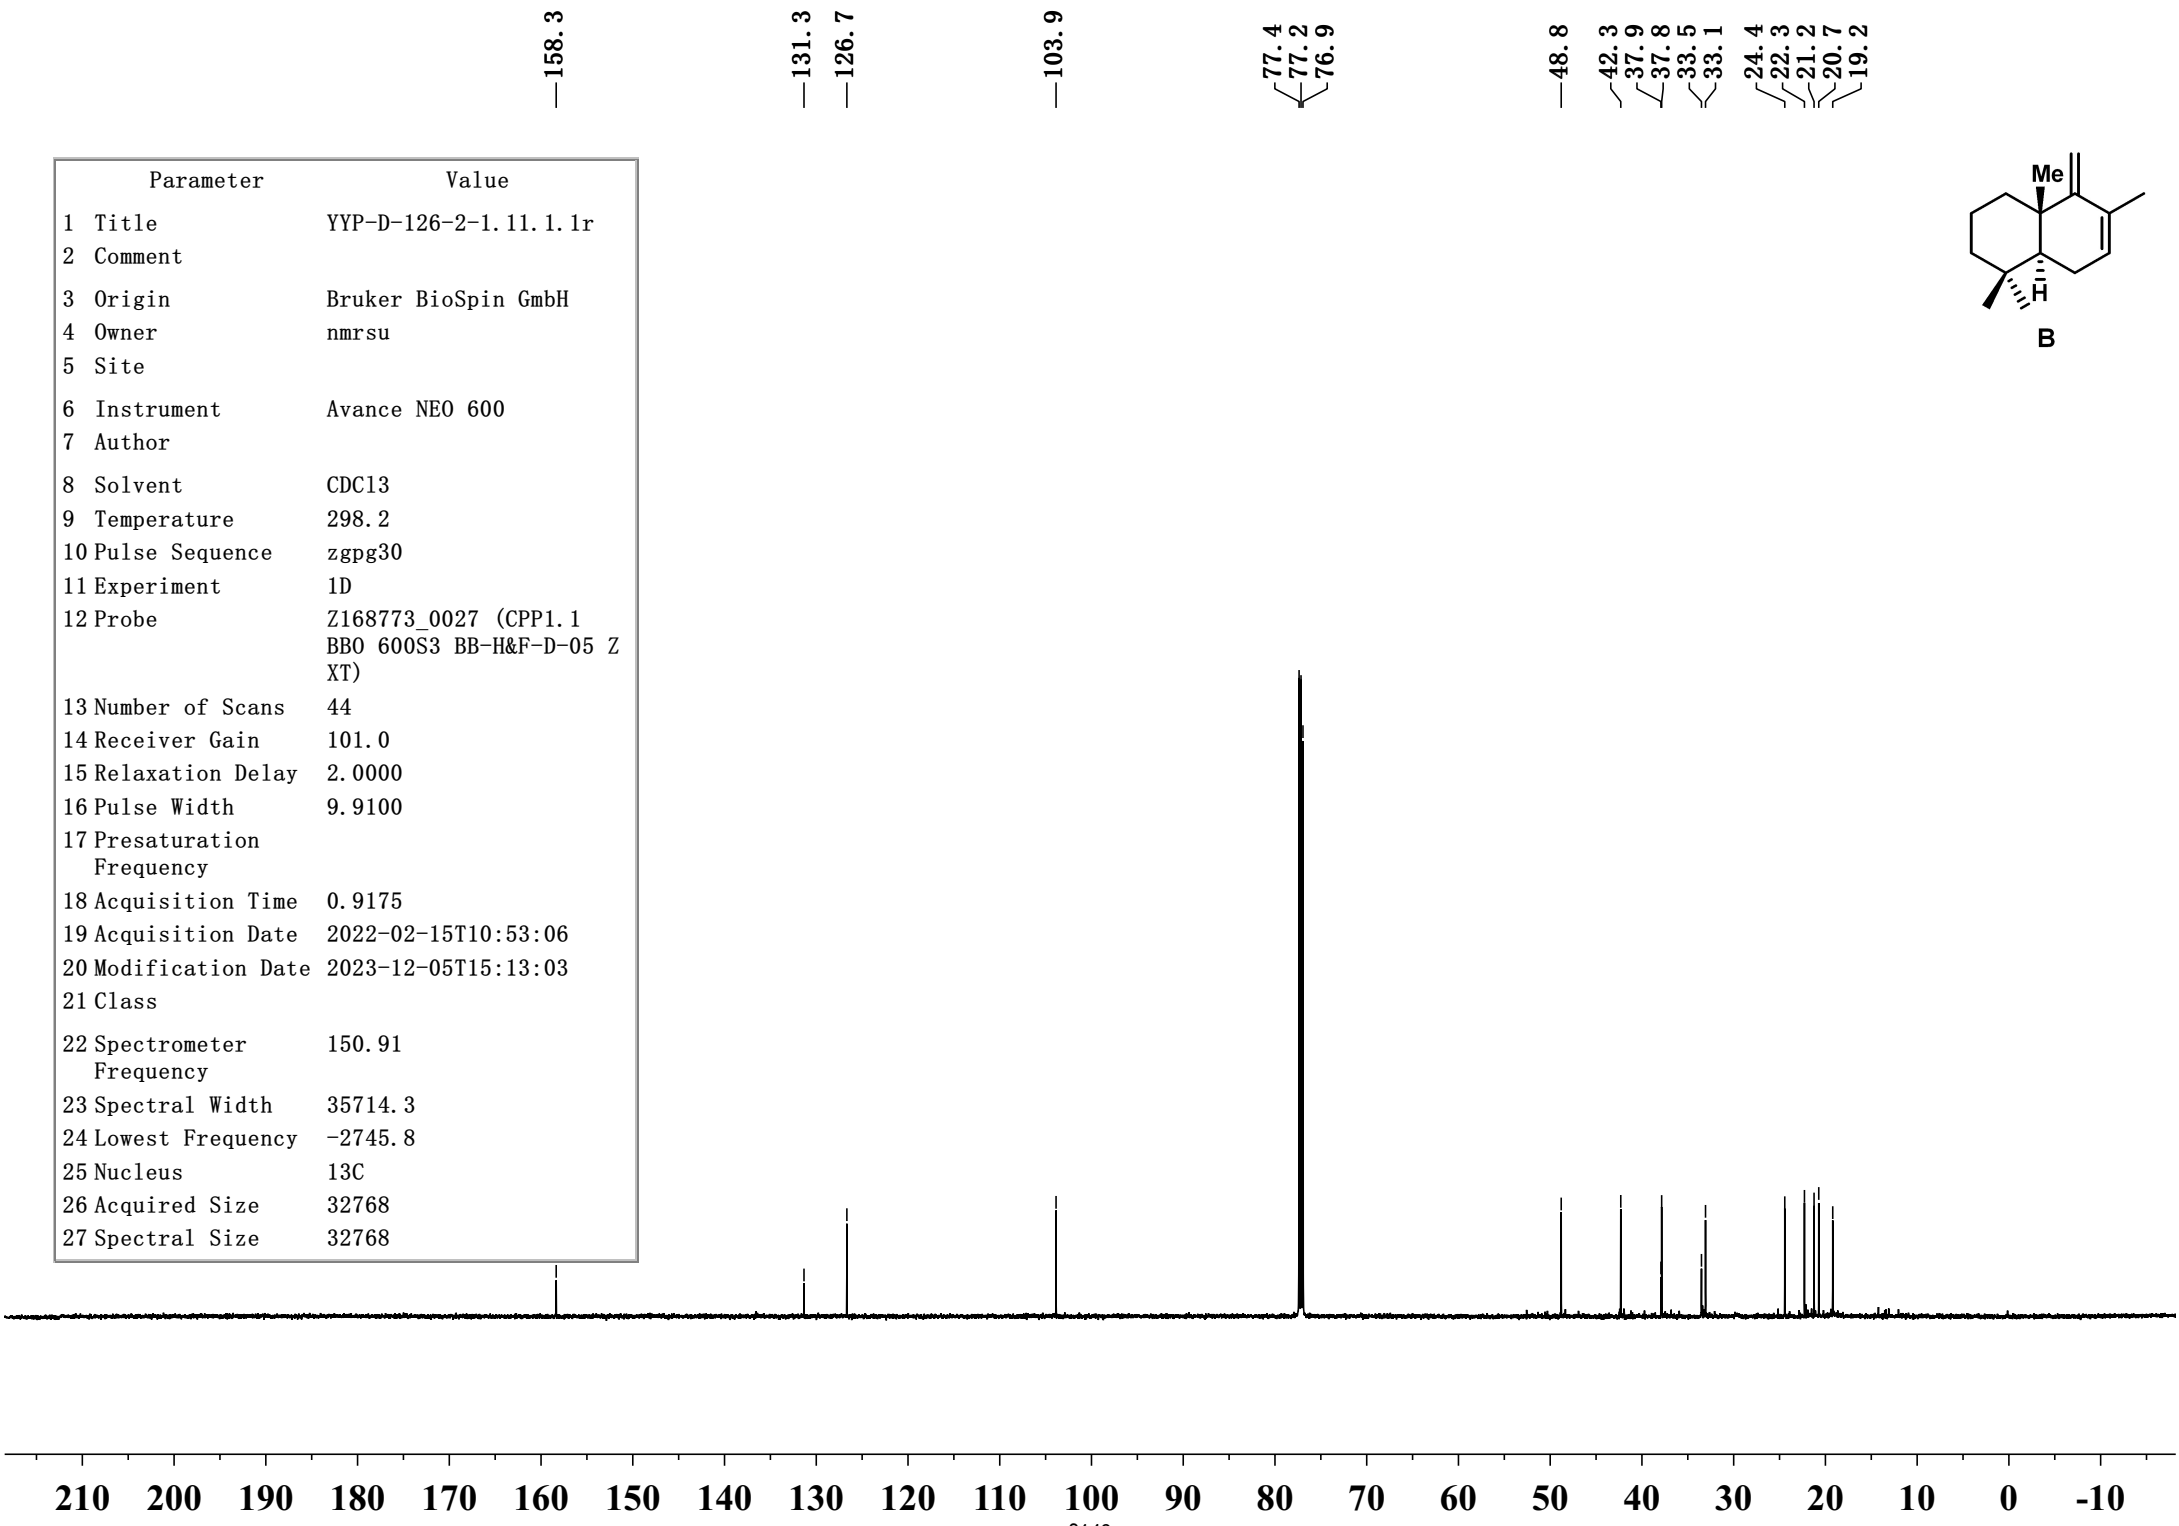

| Parameter                     | Value                                          |
|-------------------------------|------------------------------------------------|
| 1 Title                       | YYP-G-119-12-3.10.1.1r                         |
| 2 Comment                     |                                                |
| 3 Origin                      | Bruker BioSpin GmbH                            |
| 4 Owner                       | nmrsu                                          |
| 5 Site                        |                                                |
| 6 Instrument                  | Avance NEO 600                                 |
| 7 Author                      |                                                |
| 8 Solvent                     | CDC13                                          |
| 9 Temperature                 | 298.2                                          |
| 10 Pulse Sequence             | zg30                                           |
| 11 Experiment                 | 1D                                             |
| 12 Probe                      | Z114607_0339 (PA BBO<br>600S3 BBF-H-D-05 Z SP) |
| 13 Number of Scans            | 8                                              |
| 14 Receiver Gain              | 101.0                                          |
| 15 Relaxation Delay           | 1.0000                                         |
| 16 Pulse Width                | 10.0000                                        |
| 17 Presaturation<br>Frequency |                                                |
| 18 Acquisition Time           | 2.7525                                         |
| 19 Acquisition Date           | 2023-11-28T17:36:52                            |
| 20 Modification Date          | 2023-11-28T17:50:17                            |
| 21 Class                      |                                                |
| 22 Spectrometer<br>Frequency  | 600.15                                         |
| 23 Spectral Width             | 11904.8                                        |
| 24 Lowest Frequency           | -2260.4                                        |
| 25 Nucleus                    | <sup>1</sup> H                                 |
| 26 Acquired Size              | 32768                                          |
| 27 Spectral Size              | 65536                                          |

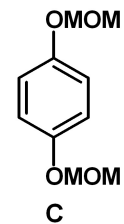

—7.26  
—6.97  
  
—5.12  
  
—3.48

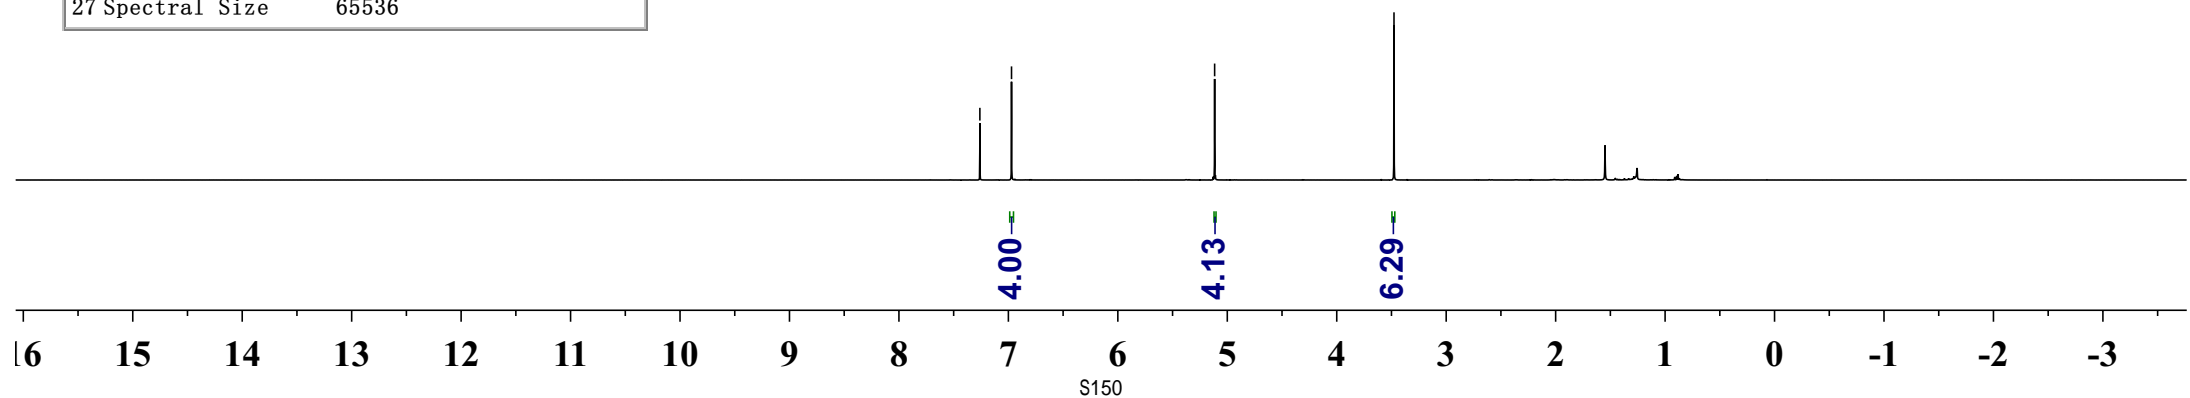

| Parameter                     | Value                                          |
|-------------------------------|------------------------------------------------|
| 1 Title                       | YYP-G-119-12-3. 11. 1. 1r                      |
| 2 Comment                     |                                                |
| 3 Origin                      | Bruker BioSpin GmbH                            |
| 4 Owner                       | nmrsu                                          |
| 5 Site                        |                                                |
| 6 Instrument                  | Avance NEO 600                                 |
| 7 Author                      |                                                |
| 8 Solvent                     | CDC13                                          |
| 9 Temperature                 | 298.1                                          |
| 10 Pulse Sequence             | zgpg30                                         |
| 11 Experiment                 | 1D                                             |
| 12 Probe                      | Z114607_0339 (PA BBO<br>600S3 BBF-H-D-05 Z SP) |
| 13 Number of Scans            | 200                                            |
| 14 Receiver Gain              | 101.0                                          |
| 15 Relaxation Delay           | 2.0000                                         |
| 16 Pulse Width                | 11.5000                                        |
| 17 Presaturation<br>Frequency |                                                |
| 18 Acquisition Time           | 0.9175                                         |
| 19 Acquisition Date           | 2023-11-28T17:48:04                            |
| 20 Modification Date          | 2023-11-28T17:50:17                            |
| 21 Class                      |                                                |
| 22 Spectrometer<br>Frequency  | 150.91                                         |
| 23 Spectral Width             | 35714.3                                        |
| 24 Lowest Frequency           | -2744.9                                        |
| 25 Nucleus                    | 13C                                            |
| 26 Acquired Size              | 32768                                          |
| 27 Spectral Size              | 32768                                          |

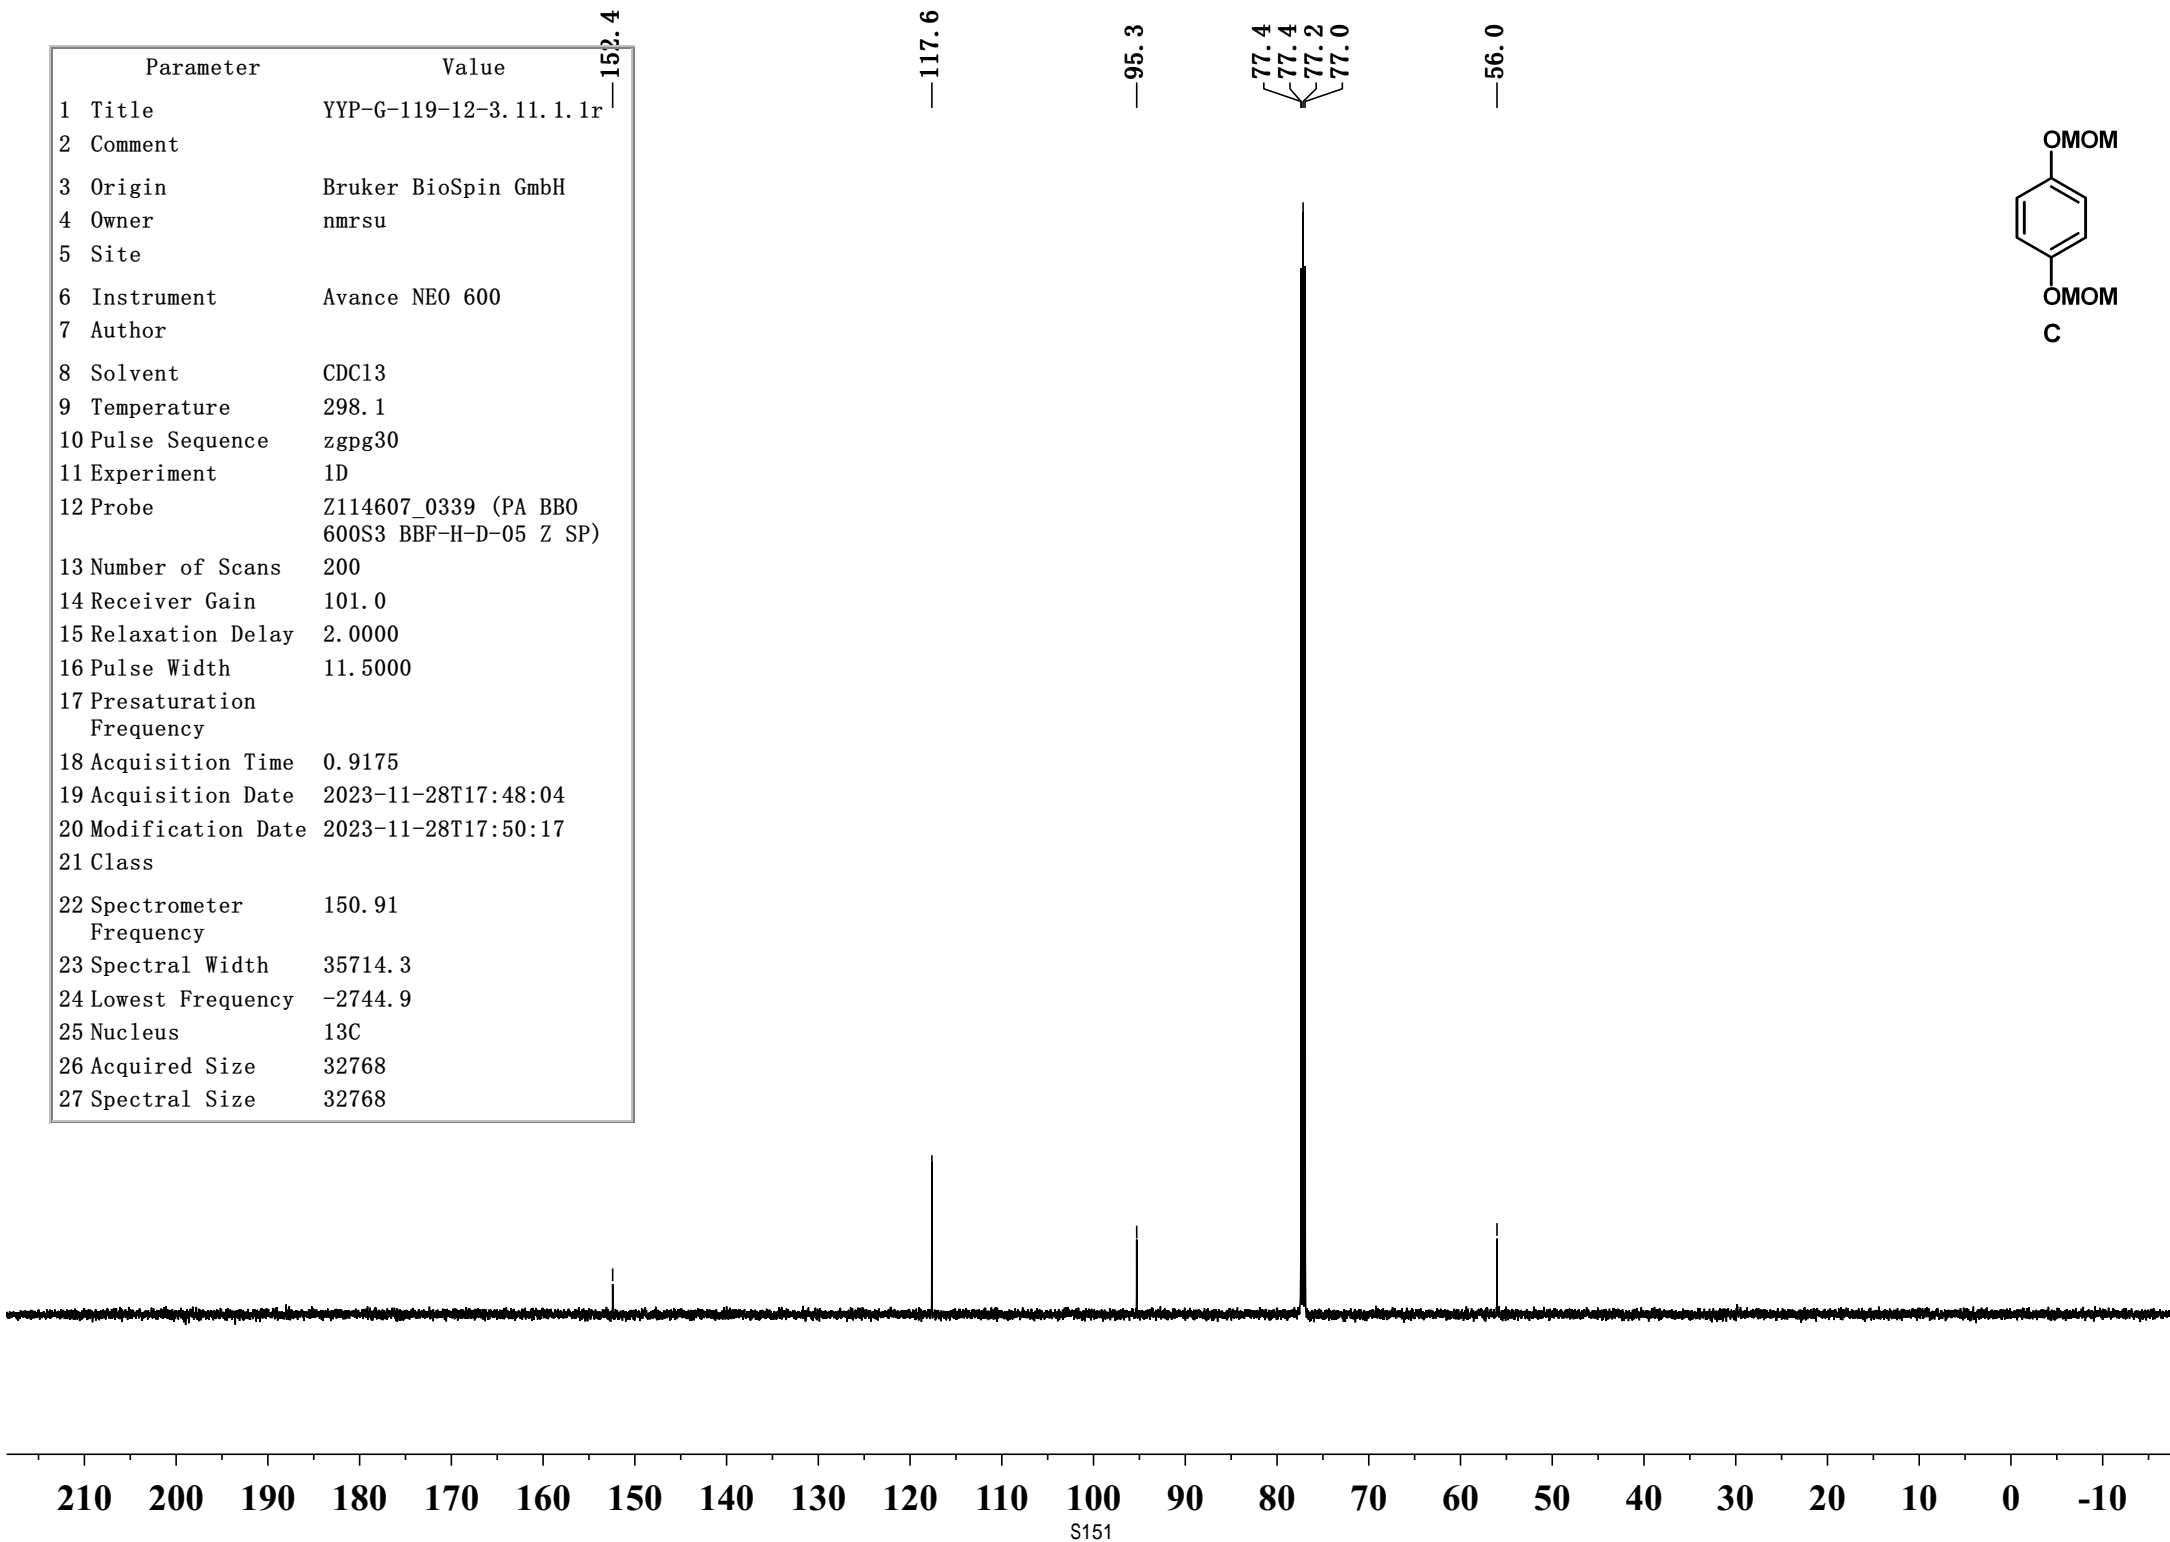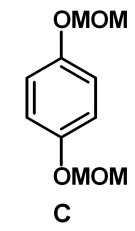

| Parameter                     | Value                                          |
|-------------------------------|------------------------------------------------|
| 1 Title                       | YYP-G-119-1-3. 10. 1. 1r                       |
| 2 Comment                     |                                                |
| 3 Origin                      | Bruker BioSpin GmbH                            |
| 4 Owner                       | nmrsu                                          |
| 5 Site                        |                                                |
| 6 Instrument                  | Avance NEO 600                                 |
| 7 Author                      |                                                |
| 8 Solvent                     | CDC13                                          |
| 9 Temperature                 | 298.1                                          |
| 10 Pulse Sequence             | zg30                                           |
| 11 Experiment                 | 1D                                             |
| 12 Probe                      | Z114607_0339 (PA BBO<br>600S3 BBF-H-D-05 Z SP) |
| 13 Number of Scans            | 8                                              |
| 14 Receiver Gain              | 101.0                                          |
| 15 Relaxation Delay           | 1.0000                                         |
| 16 Pulse Width                | 10.0000                                        |
| 17 Presaturation<br>Frequency |                                                |
| 18 Acquisition Time           | 2.7525                                         |
| 19 Acquisition Date           | 2023-11-28T11:53:04                            |
| 20 Modification Date          | 2023-11-28T12:14:40                            |
| 21 Class                      |                                                |
| 22 Spectrometer<br>Frequency  | 600.15                                         |
| 23 Spectral Width             | 11904.8                                        |
| 24 Lowest Frequency           | -2260.8                                        |
| 25 Nucleus                    | <sup>1</sup> H                                 |
| 26 Acquired Size              | 32768                                          |
| 27 Spectral Size              | 65536                                          |

7.26  
7.14  
7.12  
7.00  
6.99  
6.98  
6.97  
5.13  
4.99  
3.48  
3.33

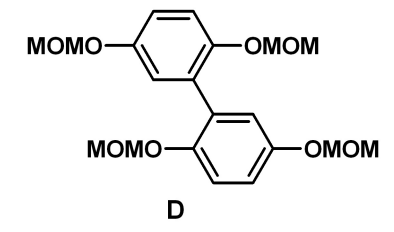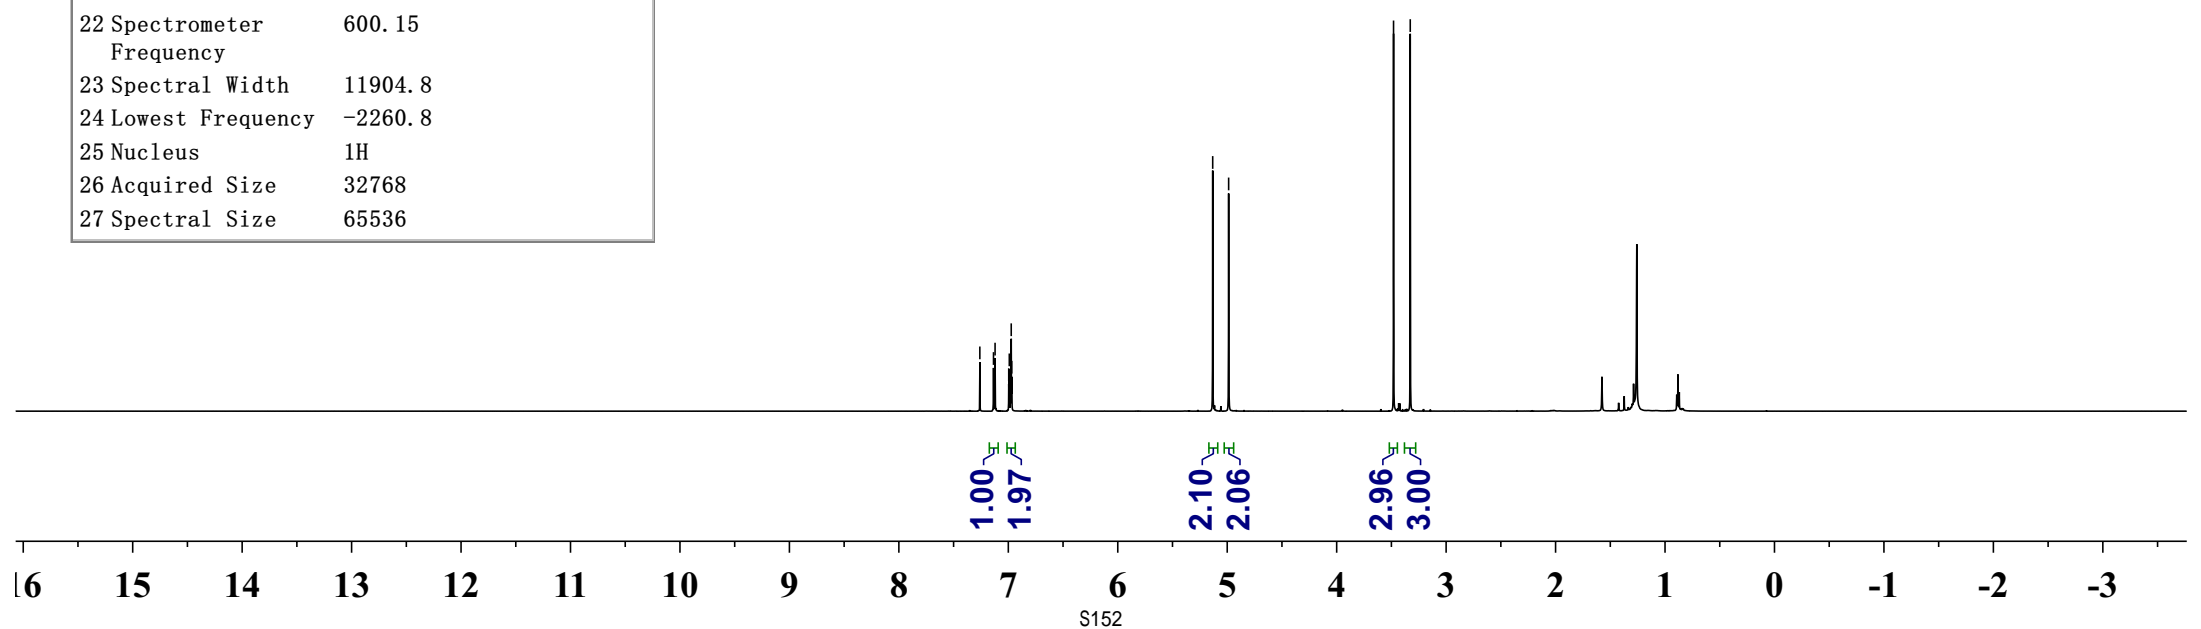

| Parameter                     | Value                                          |
|-------------------------------|------------------------------------------------|
| 1 Title                       | YYP-G-119-1-3.11.1.1r                          |
| 2 Comment                     |                                                |
| 3 Origin                      | Bruker BioSpin GmbH                            |
| 4 Owner                       | nmsu                                           |
| 5 Site                        |                                                |
| 6 Instrument                  | Avance NEO 600                                 |
| 7 Author                      |                                                |
| 8 Solvent                     | CDC13                                          |
| 9 Temperature                 | 298.1                                          |
| 10 Pulse Sequence             | zgpg30                                         |
| 11 Experiment                 | 1D                                             |
| 12 Probe                      | Z114607_0339 (PA BBO<br>600S3 BBF-H-D-05 Z SP) |
| 13 Number of Scans            | 64                                             |
| 14 Receiver Gain              | 101.0                                          |
| 15 Relaxation Delay           | 2.0000                                         |
| 16 Pulse Width                | 11.5000                                        |
| 17 Presaturation<br>Frequency |                                                |
| 18 Acquisition Time           | 0.9175                                         |
| 19 Acquisition Date           | 2023-11-28T11:57:17                            |
| 20 Modification Date          | 2023-11-28T12:14:40                            |
| 21 Class                      |                                                |
| 22 Spectrometer<br>Frequency  | 150.91                                         |
| 23 Spectral Width             | 35714.3                                        |
| 24 Lowest Frequency           | -2746.1                                        |
| 25 Nucleus                    | 13C                                            |
| 26 Acquired Size              | 32768                                          |
| 27 Spectral Size              | 32768                                          |

~152.2  
~150.0

~130.2

~119.8  
~117.4  
~116.6

~96.2  
~95.3

~77.4  
~77.2  
~76.9

~56.0  
~56.0

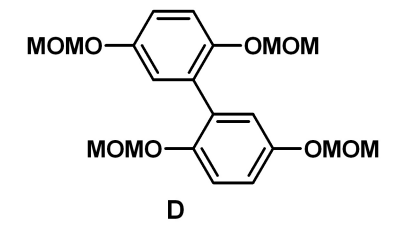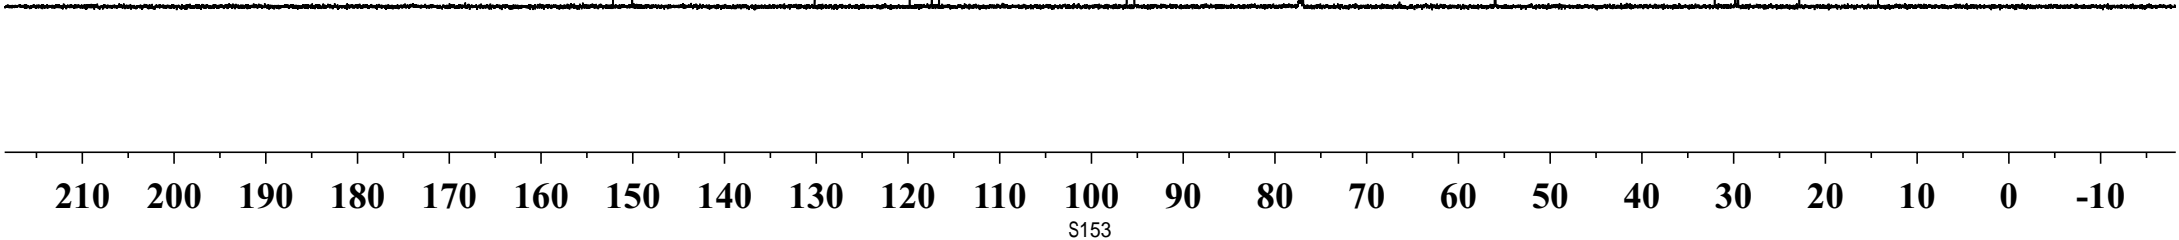

Supplement: d4sc06060a1.pdf [file d4sc06060a1.pdf]
